# Supplementary material
Source: MDPI journal article supplement (https://www.mdpi.com/2311-553X/8/4/51)

(a) Predicted Transcription Start site for THAP9

| General Information      |                                                             |
|--------------------------|-------------------------------------------------------------|
| Promoter ID:             | THAP9_1                                                     |
| Promoter type:           | region                                                      |
| Organism:                | Homo sapiens (Human)                                        |
| Gene Symbol:             | THAP9                                                       |
| Description of the gene: | THAP domain containing 9                                    |
| Sequence:                | agcccgcttctgtgacaaataaaggtcgtagccgcagagtcaacgggcGGAGCTAAAGT |
| Position in the genome:  | Chromosome [NC_000004.12]; Strand [+]; Position [82900735]  |
| Ensembl:                 | <a href="#">ENSG00000168152</a>                             |
| RefSeq:                  | <a href="#">NM_001317776</a>                                |
| NCBI Gene:               | <a href="#">THAP9</a>                                       |
| GeneCards:               | <a href="#">THAP9</a>                                       |

(b) Predicted Transcription Start sites for THAP9-AS1

| General Information      |                                                            |
|--------------------------|------------------------------------------------------------|
| Promoter ID:             | THAP9-AS1_1                                                |
| Promoter type:           | region                                                     |
| Organism:                | Homo sapiens (Human)                                       |
| Gene Symbol:             | THAP9-AS1                                                  |
| Description of the gene: | THAP9 antisense RNA 1 [Source:HGNC Symbol;Acc:HGNC:44172]  |
| Sequence:                | ccacgttgttcccagcagccaatcggaaggcctgagcctgaagacgtGCATTTGACCG |
| Position in the genome:  | Chromosome [NC_000004.12]; Strand [-]; Position [82900569] |
| Ensembl:                 | <a href="#">ENSG00000251022</a>                            |
| RefSeq:                  | <a href="#">NR_034075</a>                                  |
| NCBI Gene:               | <a href="#">THAP9-AS1</a>                                  |

| General Information      |                                                            |
|--------------------------|------------------------------------------------------------|
| Promoter ID:             | THAP9-AS1_2                                                |
| Promoter type:           | region                                                     |
| Organism:                | Homo sapiens (Human)                                       |
| Gene Symbol:             | THAP9-AS1                                                  |
| Description of the gene: | THAP9 antisense RNA 1 [Source:HGNC Symbol;Acc:HGNC:44172]  |
| Sequence:                | gtcacacacgcggcgcgacccacagtgcggccggccccgccacgccACGCCACGGCC  |
| Position in the genome:  | Chromosome [NC_000004.12]; Strand [-]; Position [82900944] |
| Ensembl:                 | <a href="#">ENSG00000251022</a>                            |
| RefSeq:                  | <a href="#">NR_034075</a>                                  |
| NCBI Gene:               | <a href="#">THAP9-AS1</a>                                  |

(c) Predicted CpG Islands for THAP9

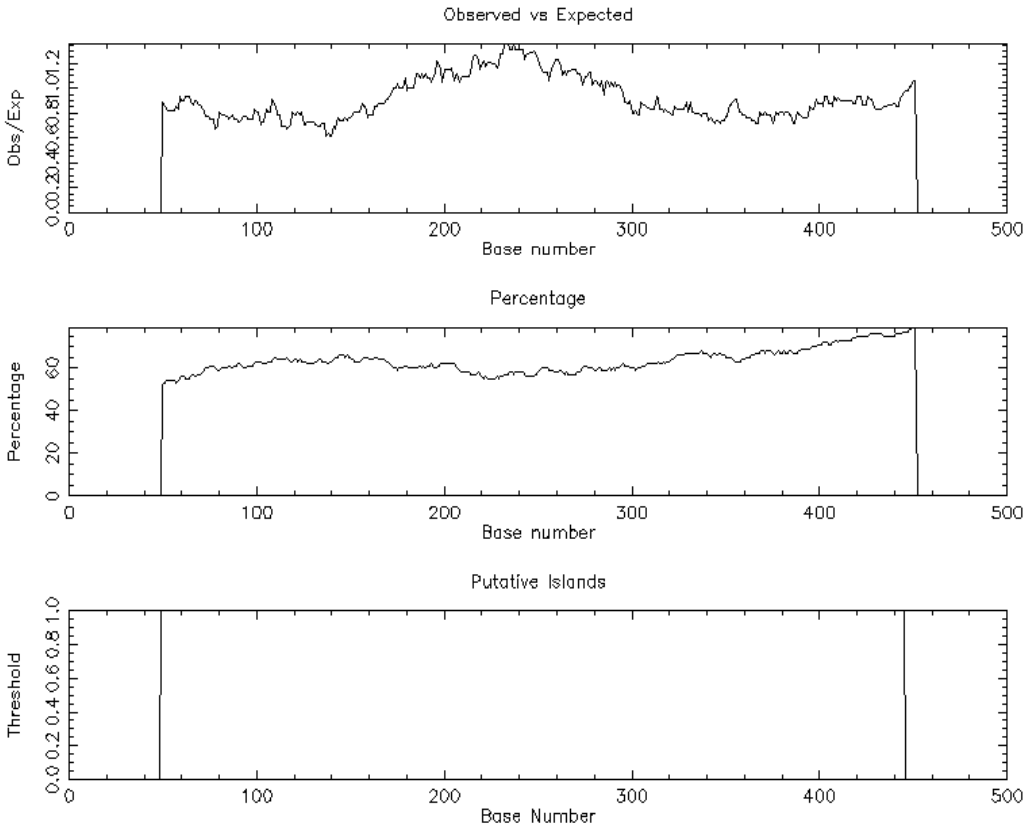

(d) Predicted CpG Islands for THAP9-AS1

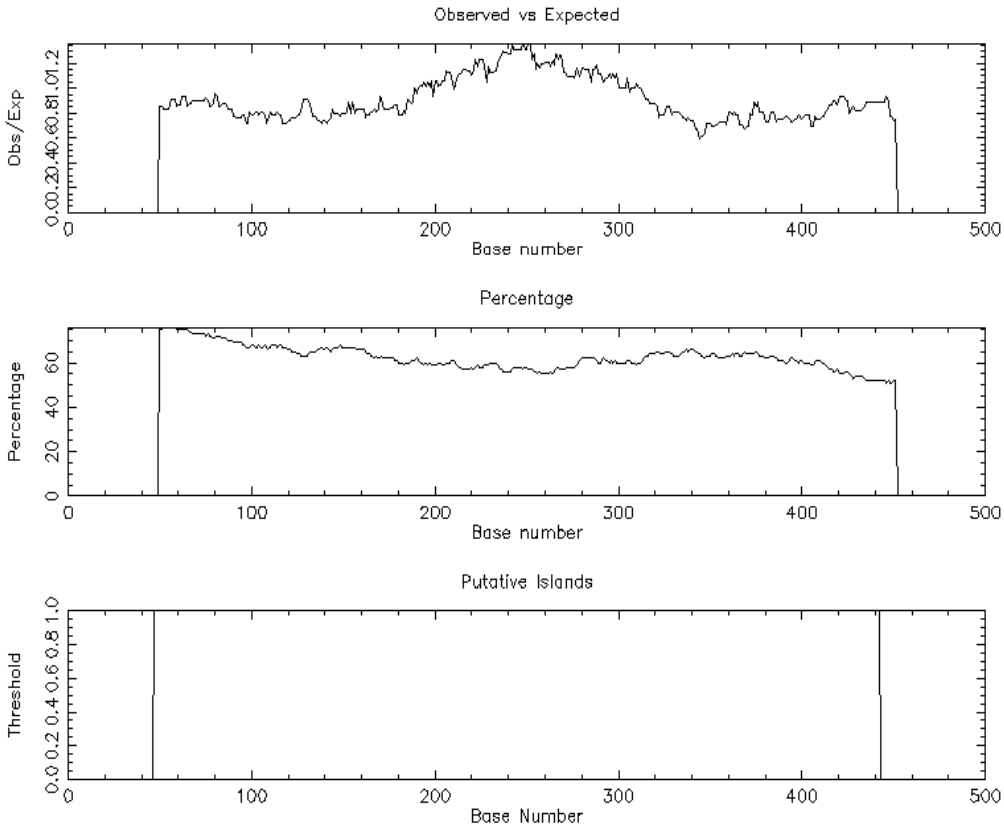

Supplement: s1 [file s1]
