# Supplementary material
Source: MDPI journal article supplement (https://www.mdpi.com/2311-553X/8/4/51)

Gain in correlation with THAP9AS1

GO Term Name TCGA-BLCA

Loss in correlation with THAP9AS1

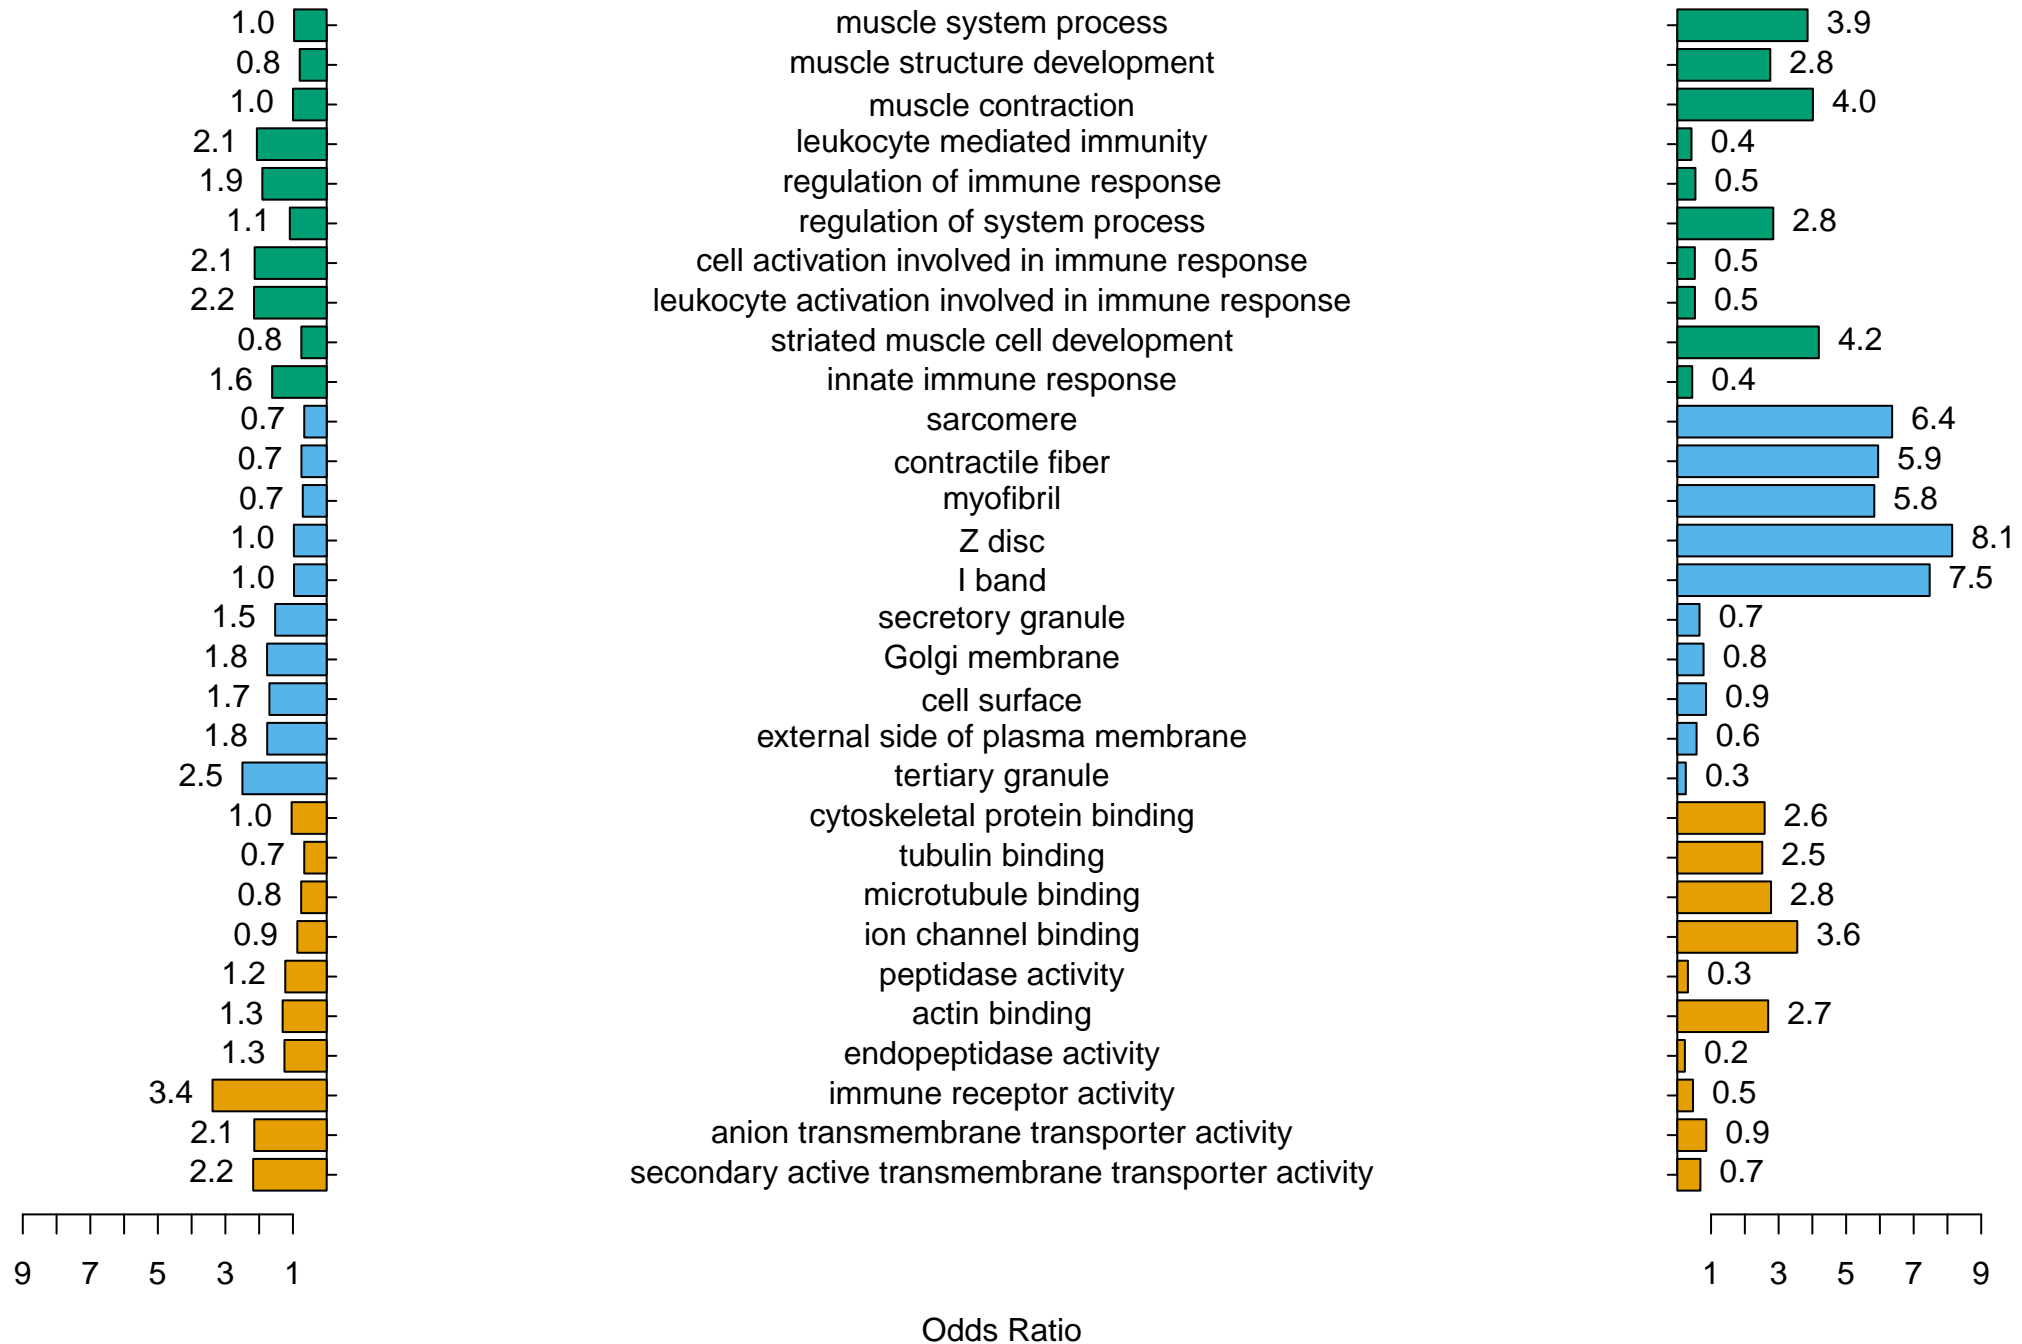

Gain in correlation with THAP9AS1    GO Term Name TCGA-BRCA    Loss in correlation with THAP9AS1

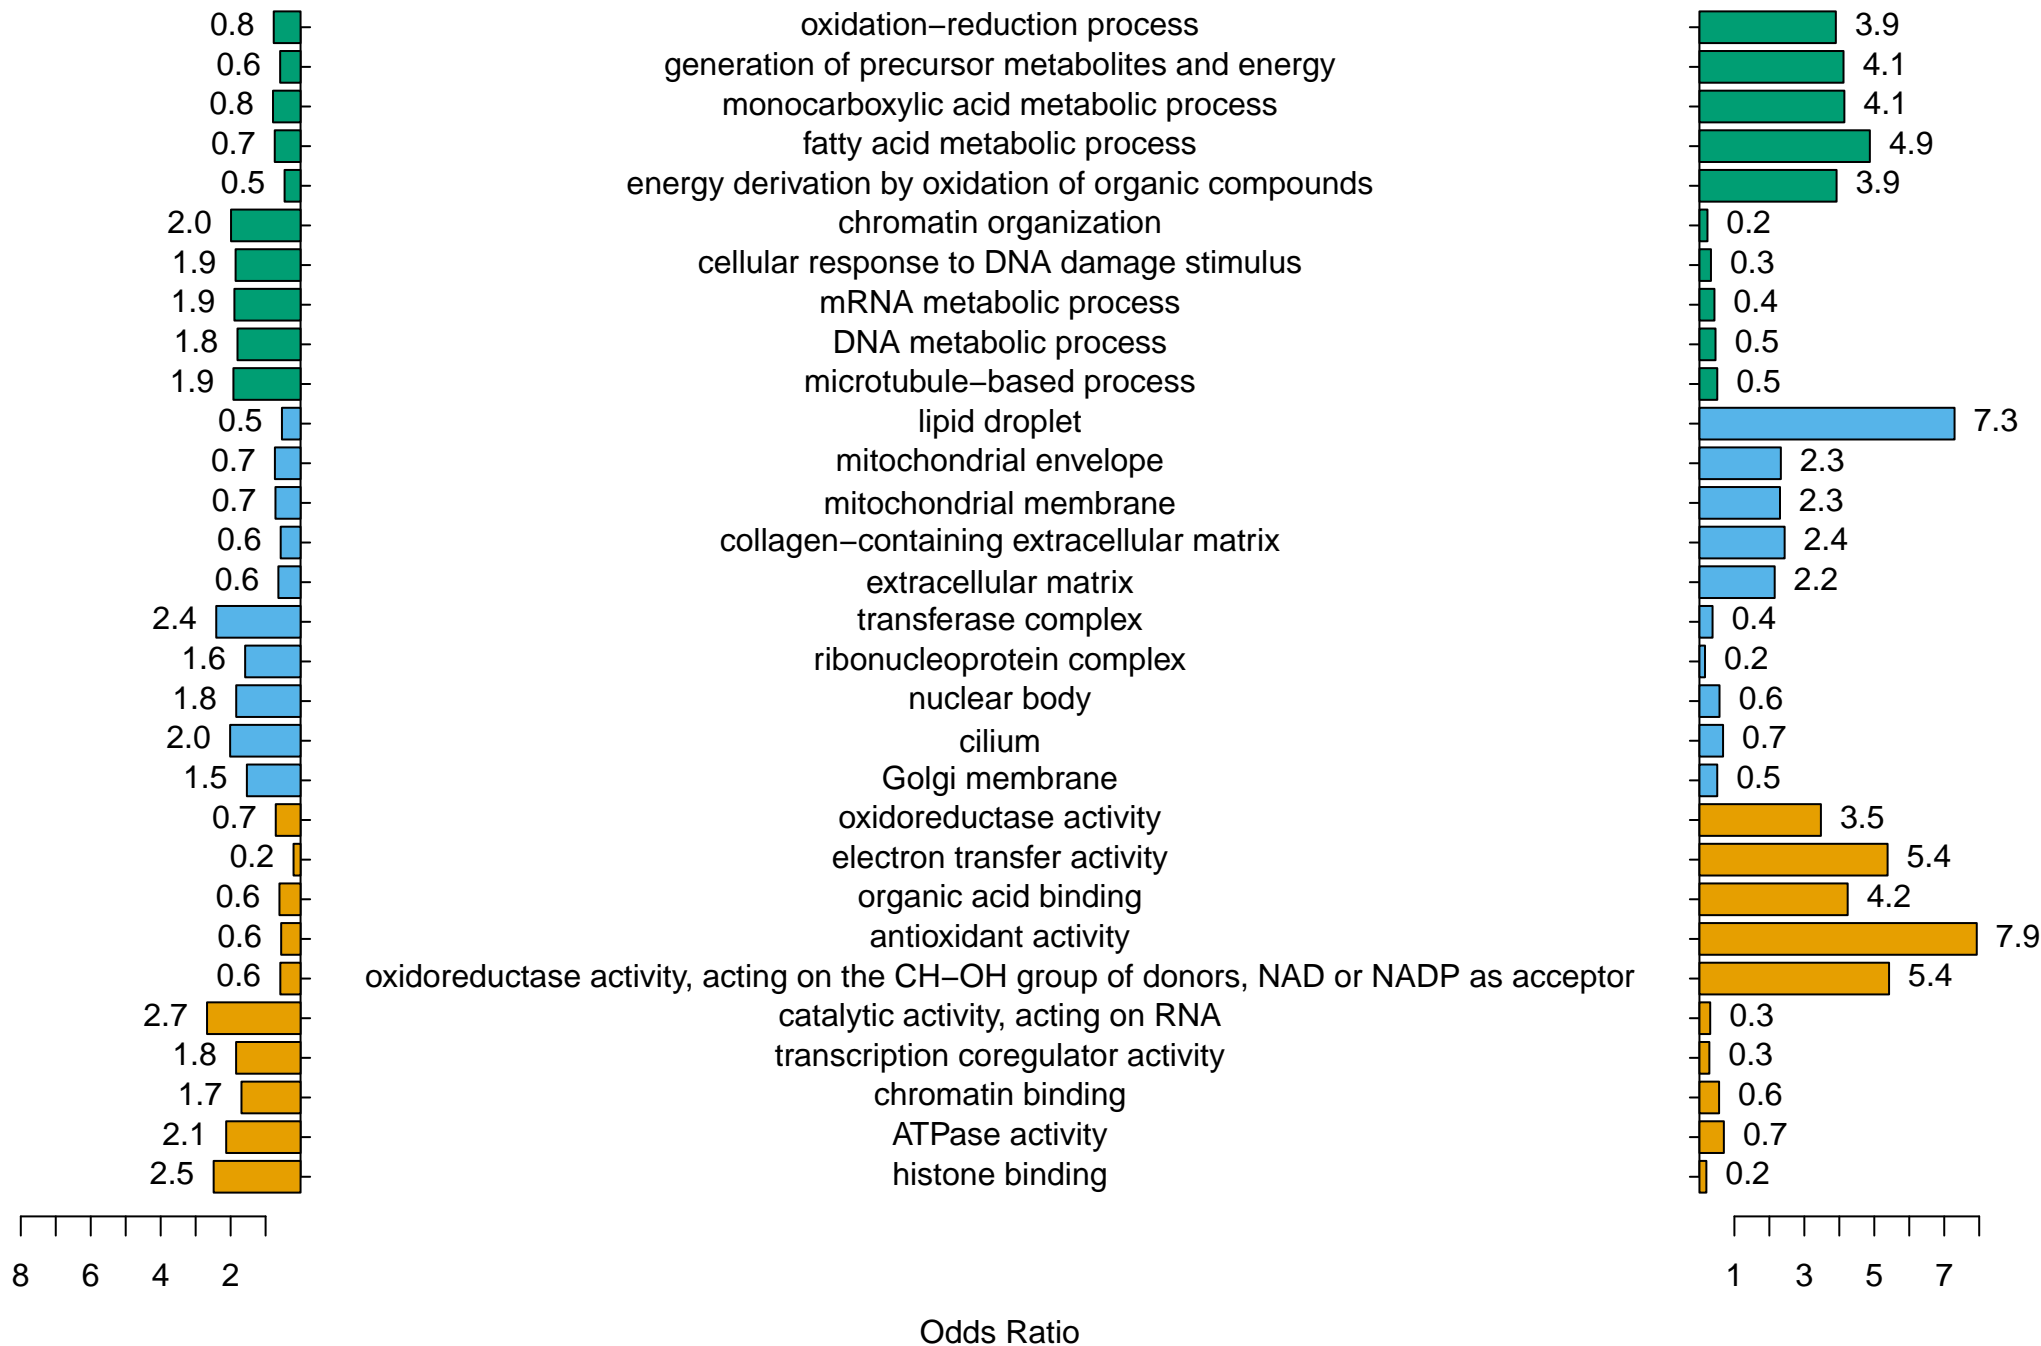

Gain in correlation with THAP9AS1    GO Term Name TCGA-CHOL    Loss in correlation with THAP9AS1

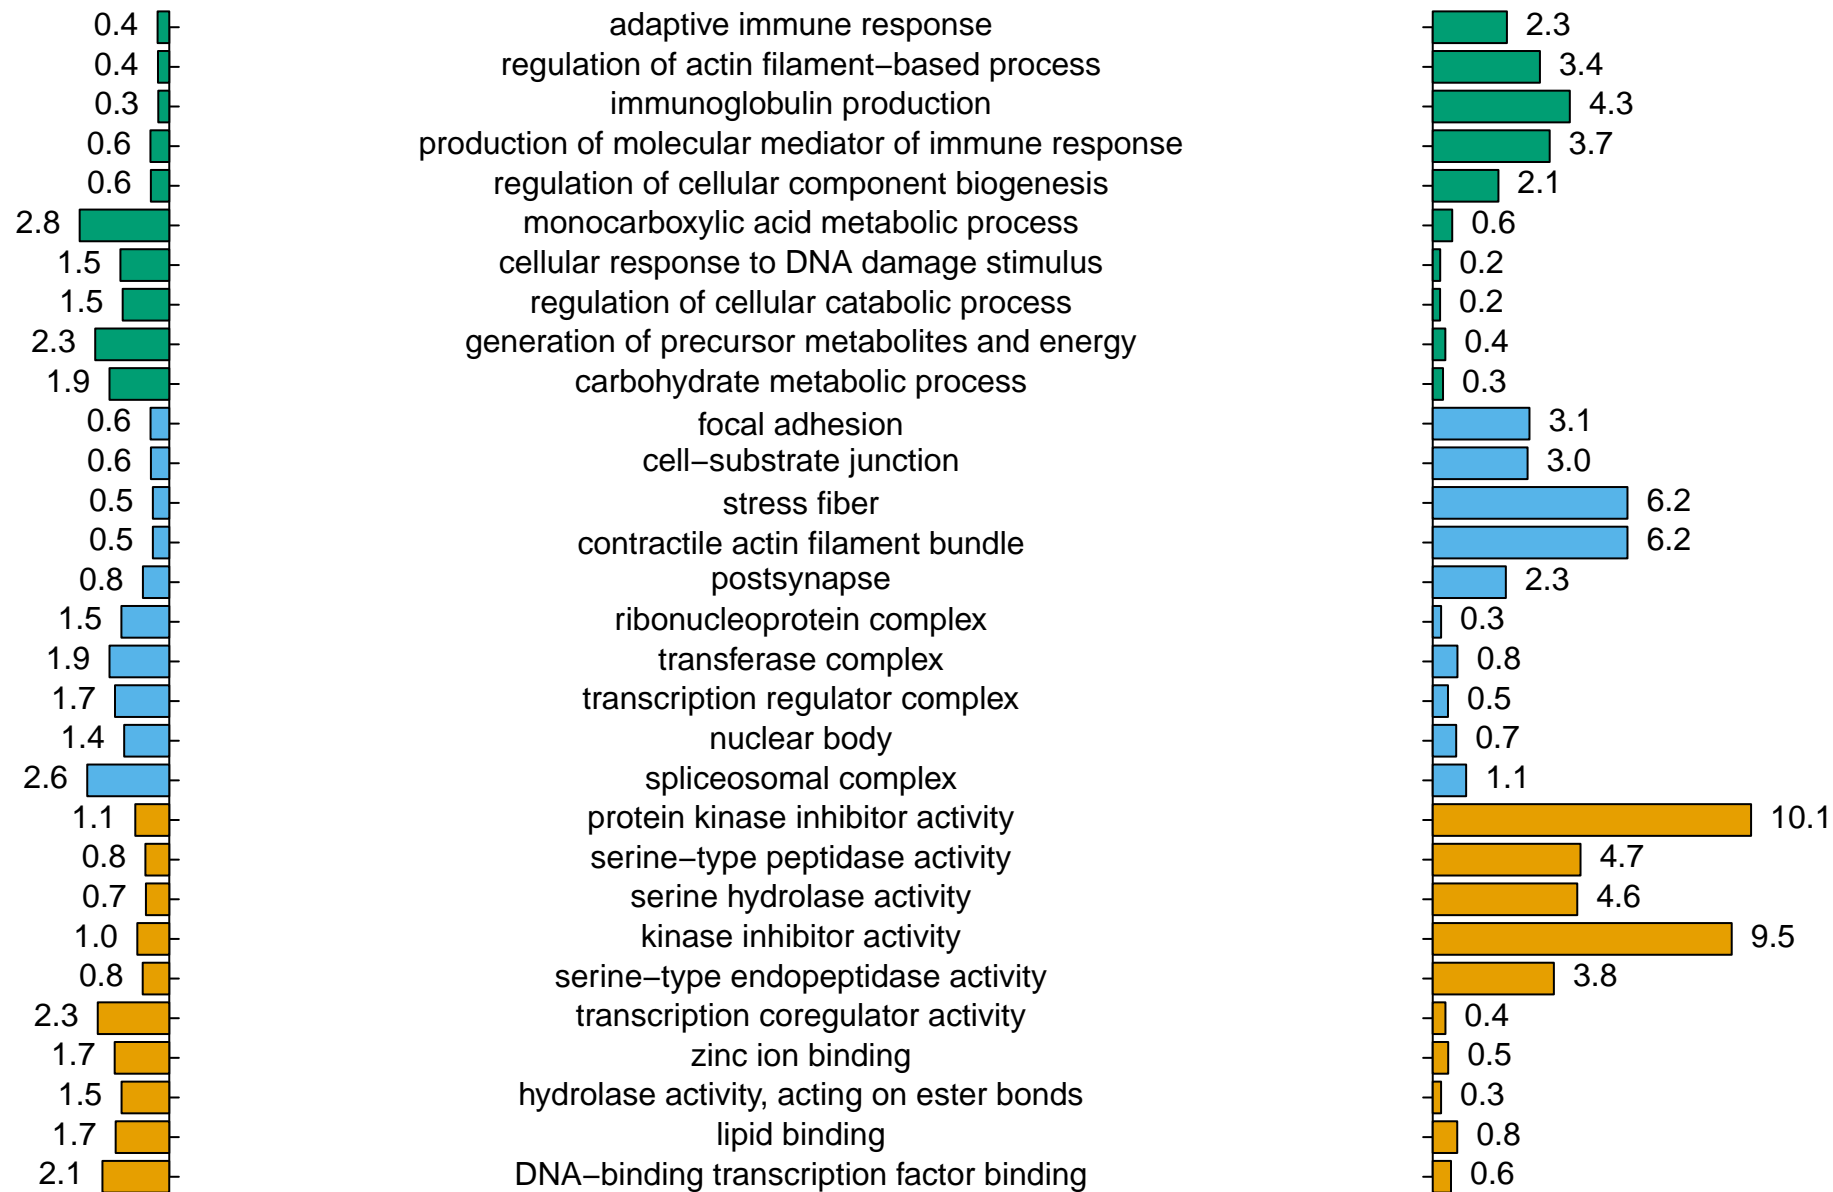

11 9 7 5 3 1

1 3 5 7 9 11

Odds Ratio

Gain in correlation with THAP9AS1    GO Term Name TCGA-COAD    Loss in correlation with THAP9AS1

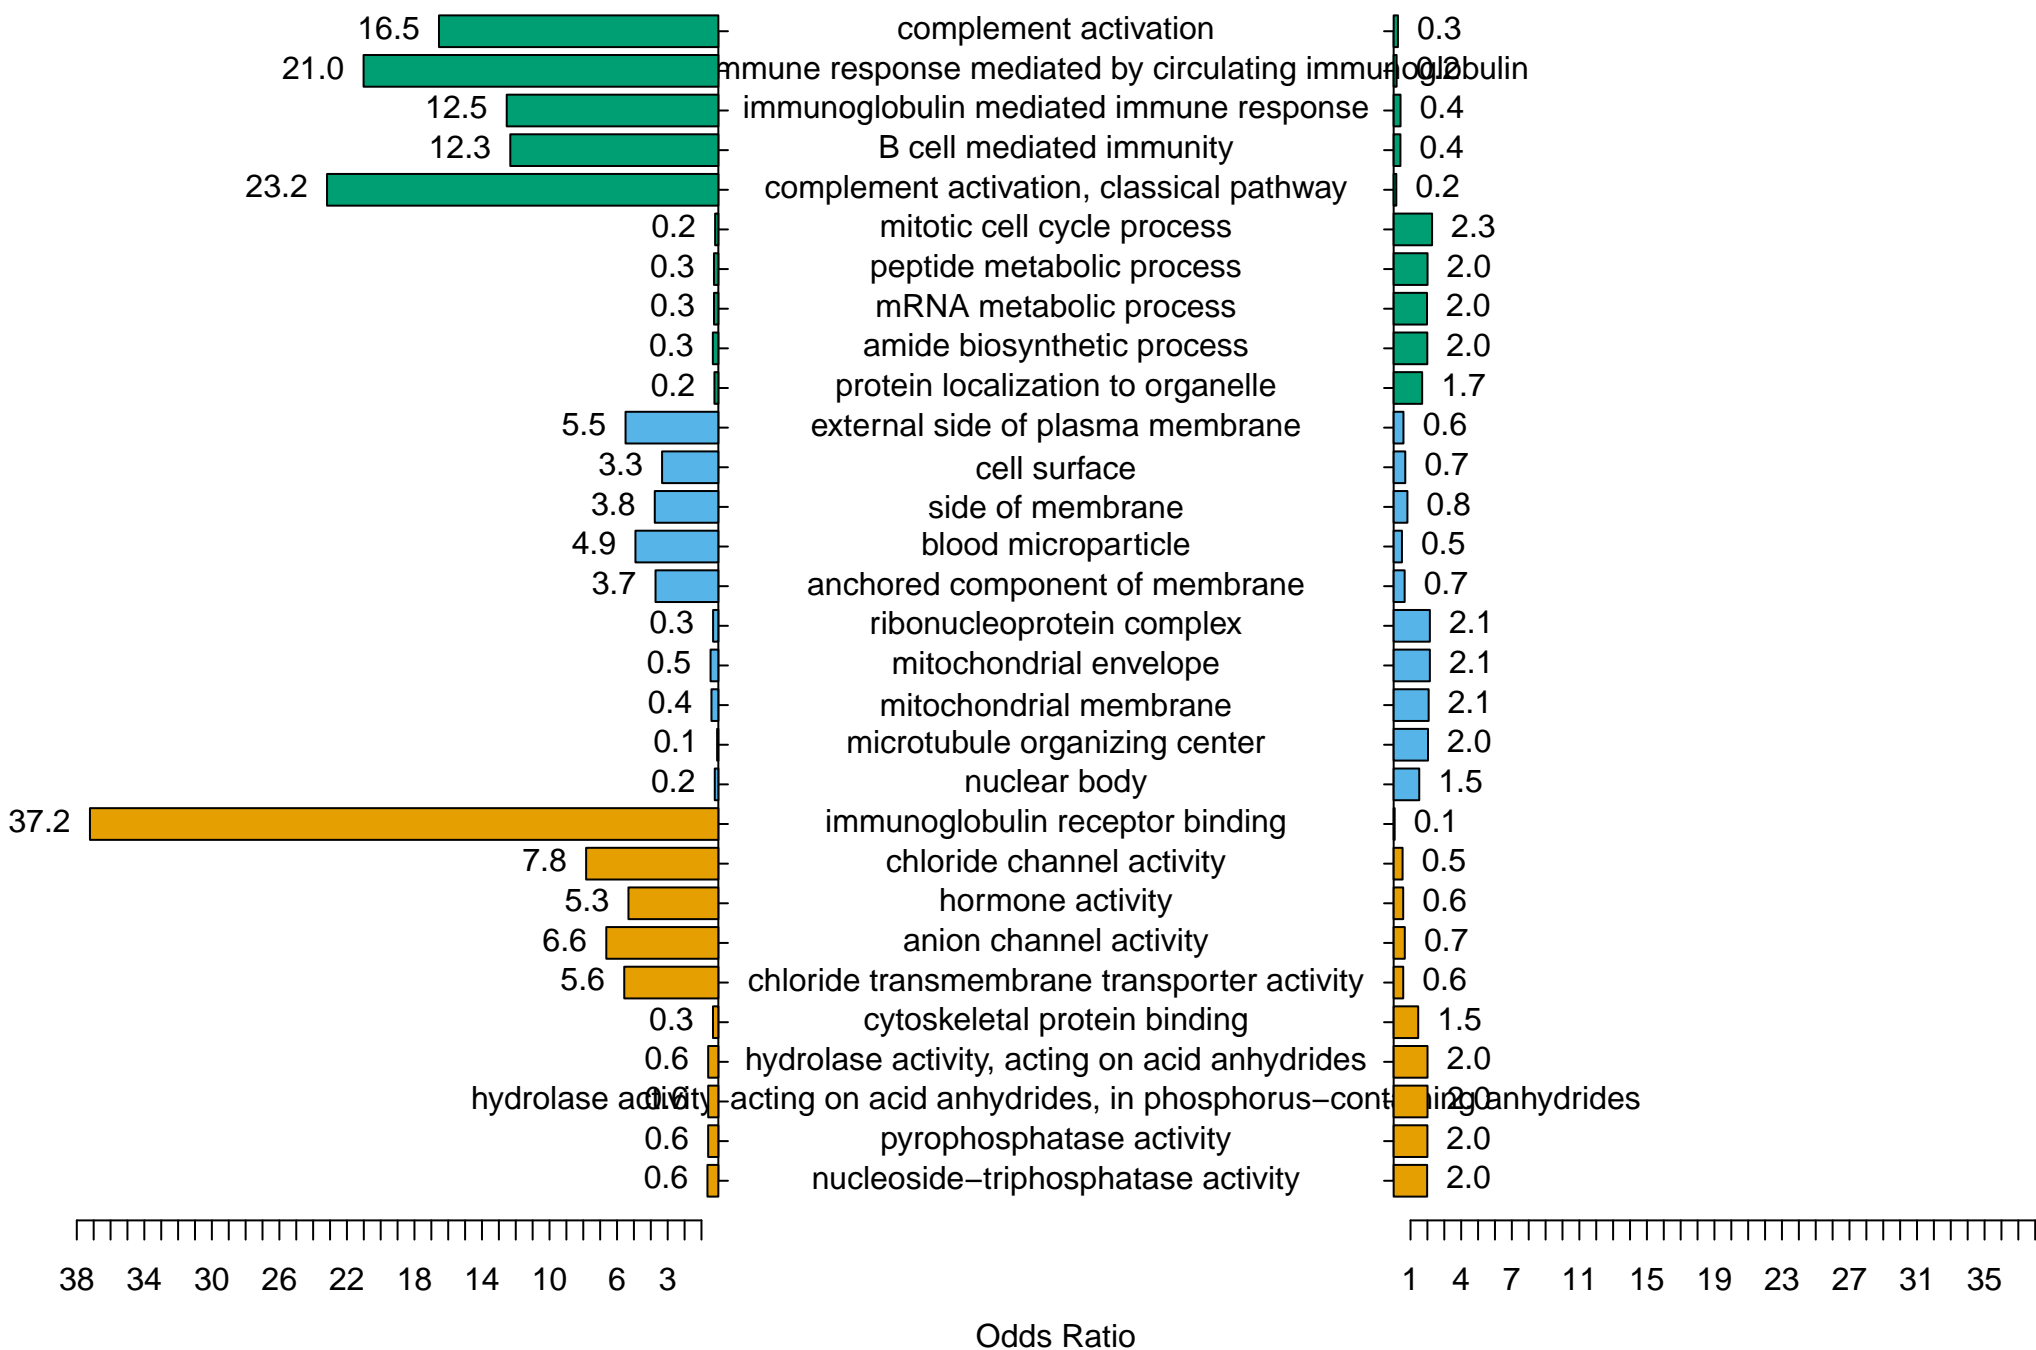

Gain in correlation with THAP9AS1    GO Term Name TCGA-ESCA    Loss in correlation with THAP9AS1

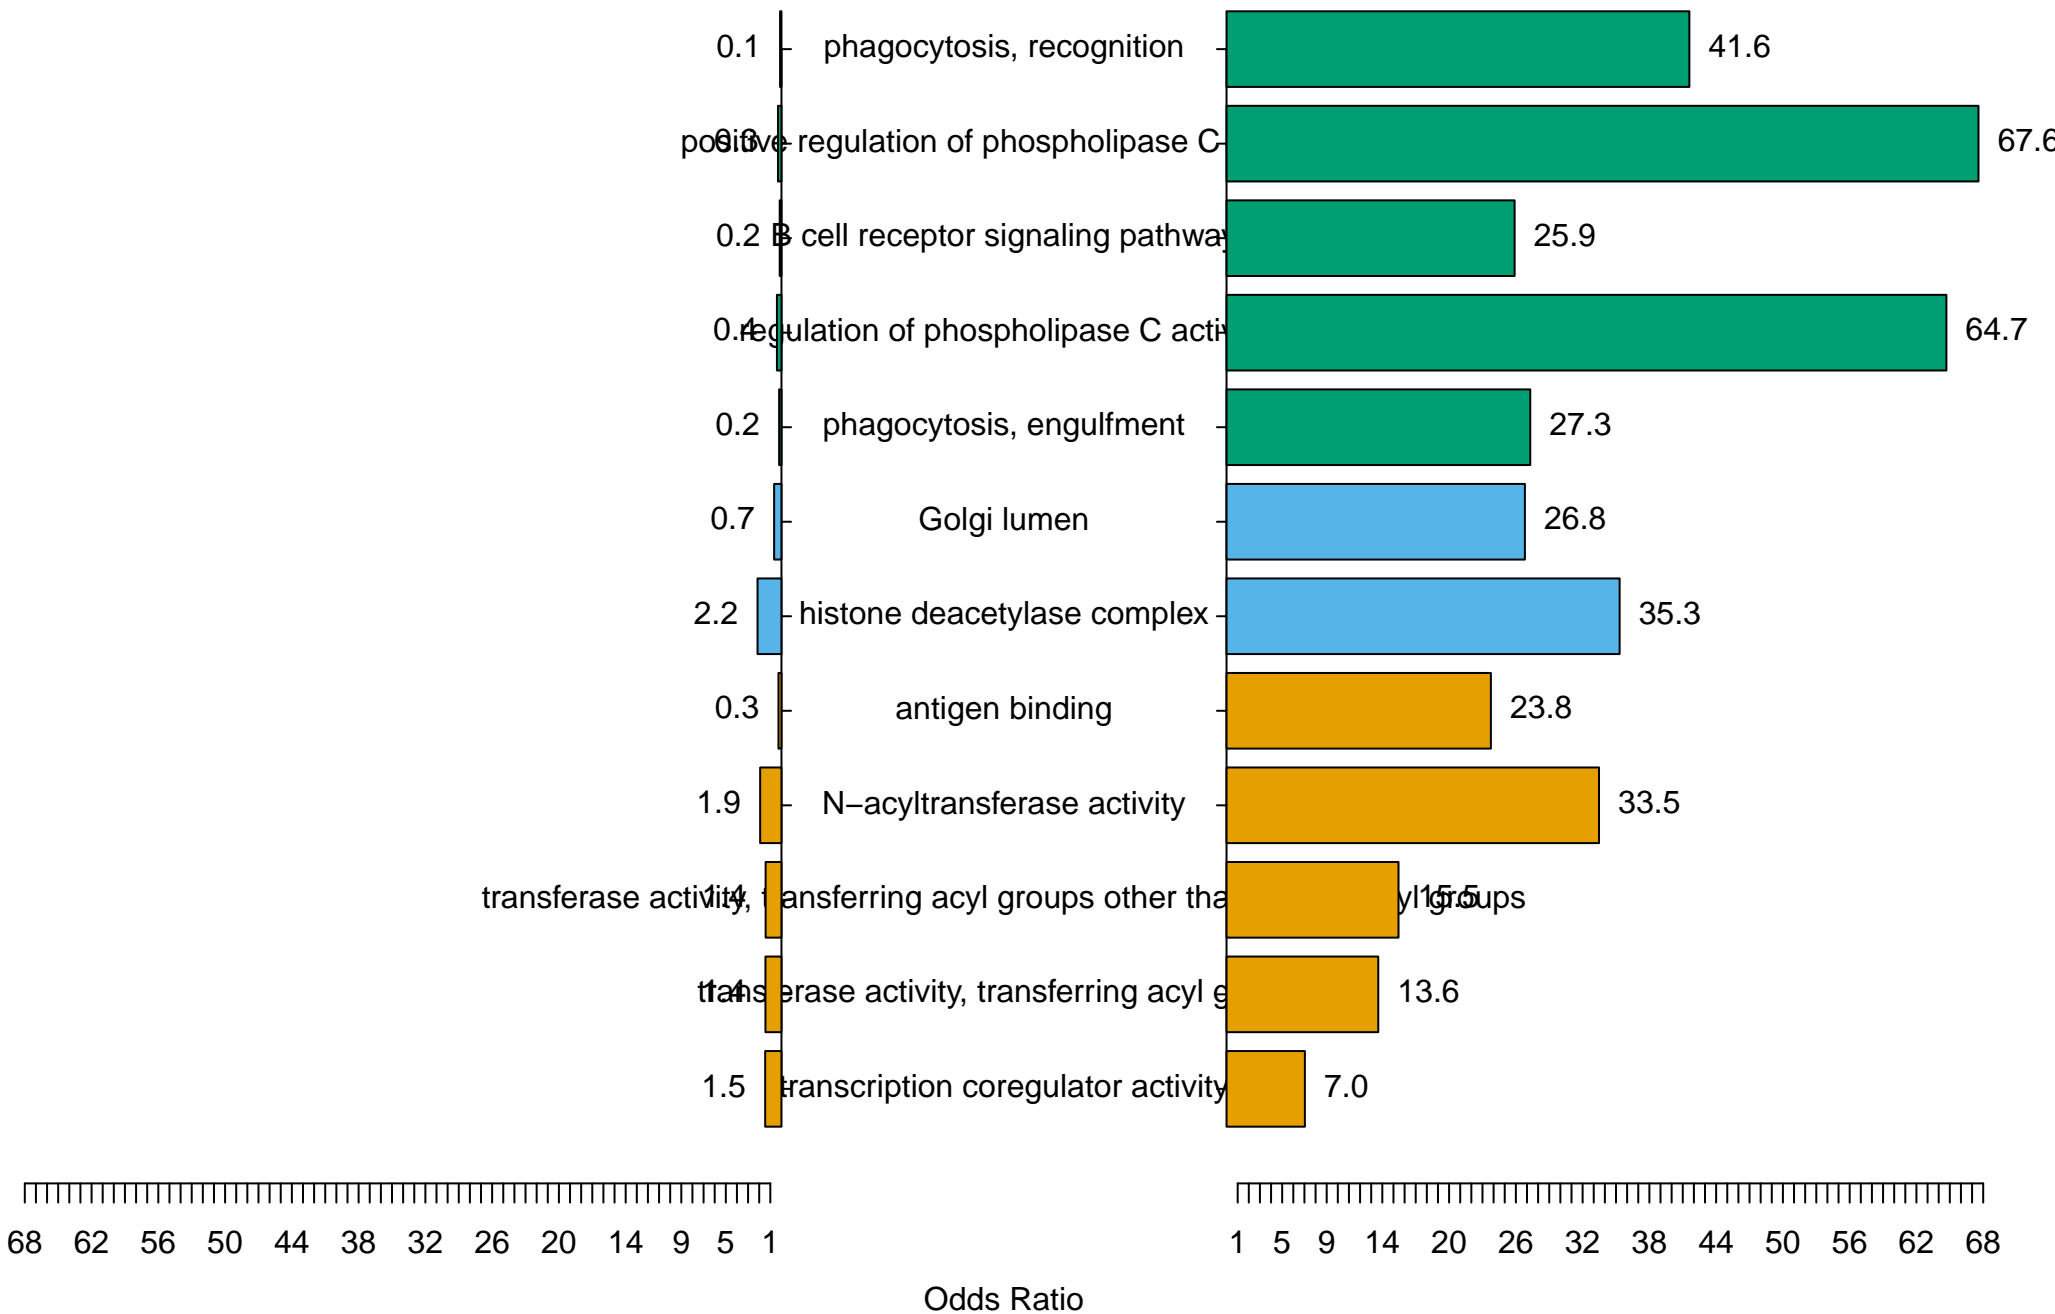

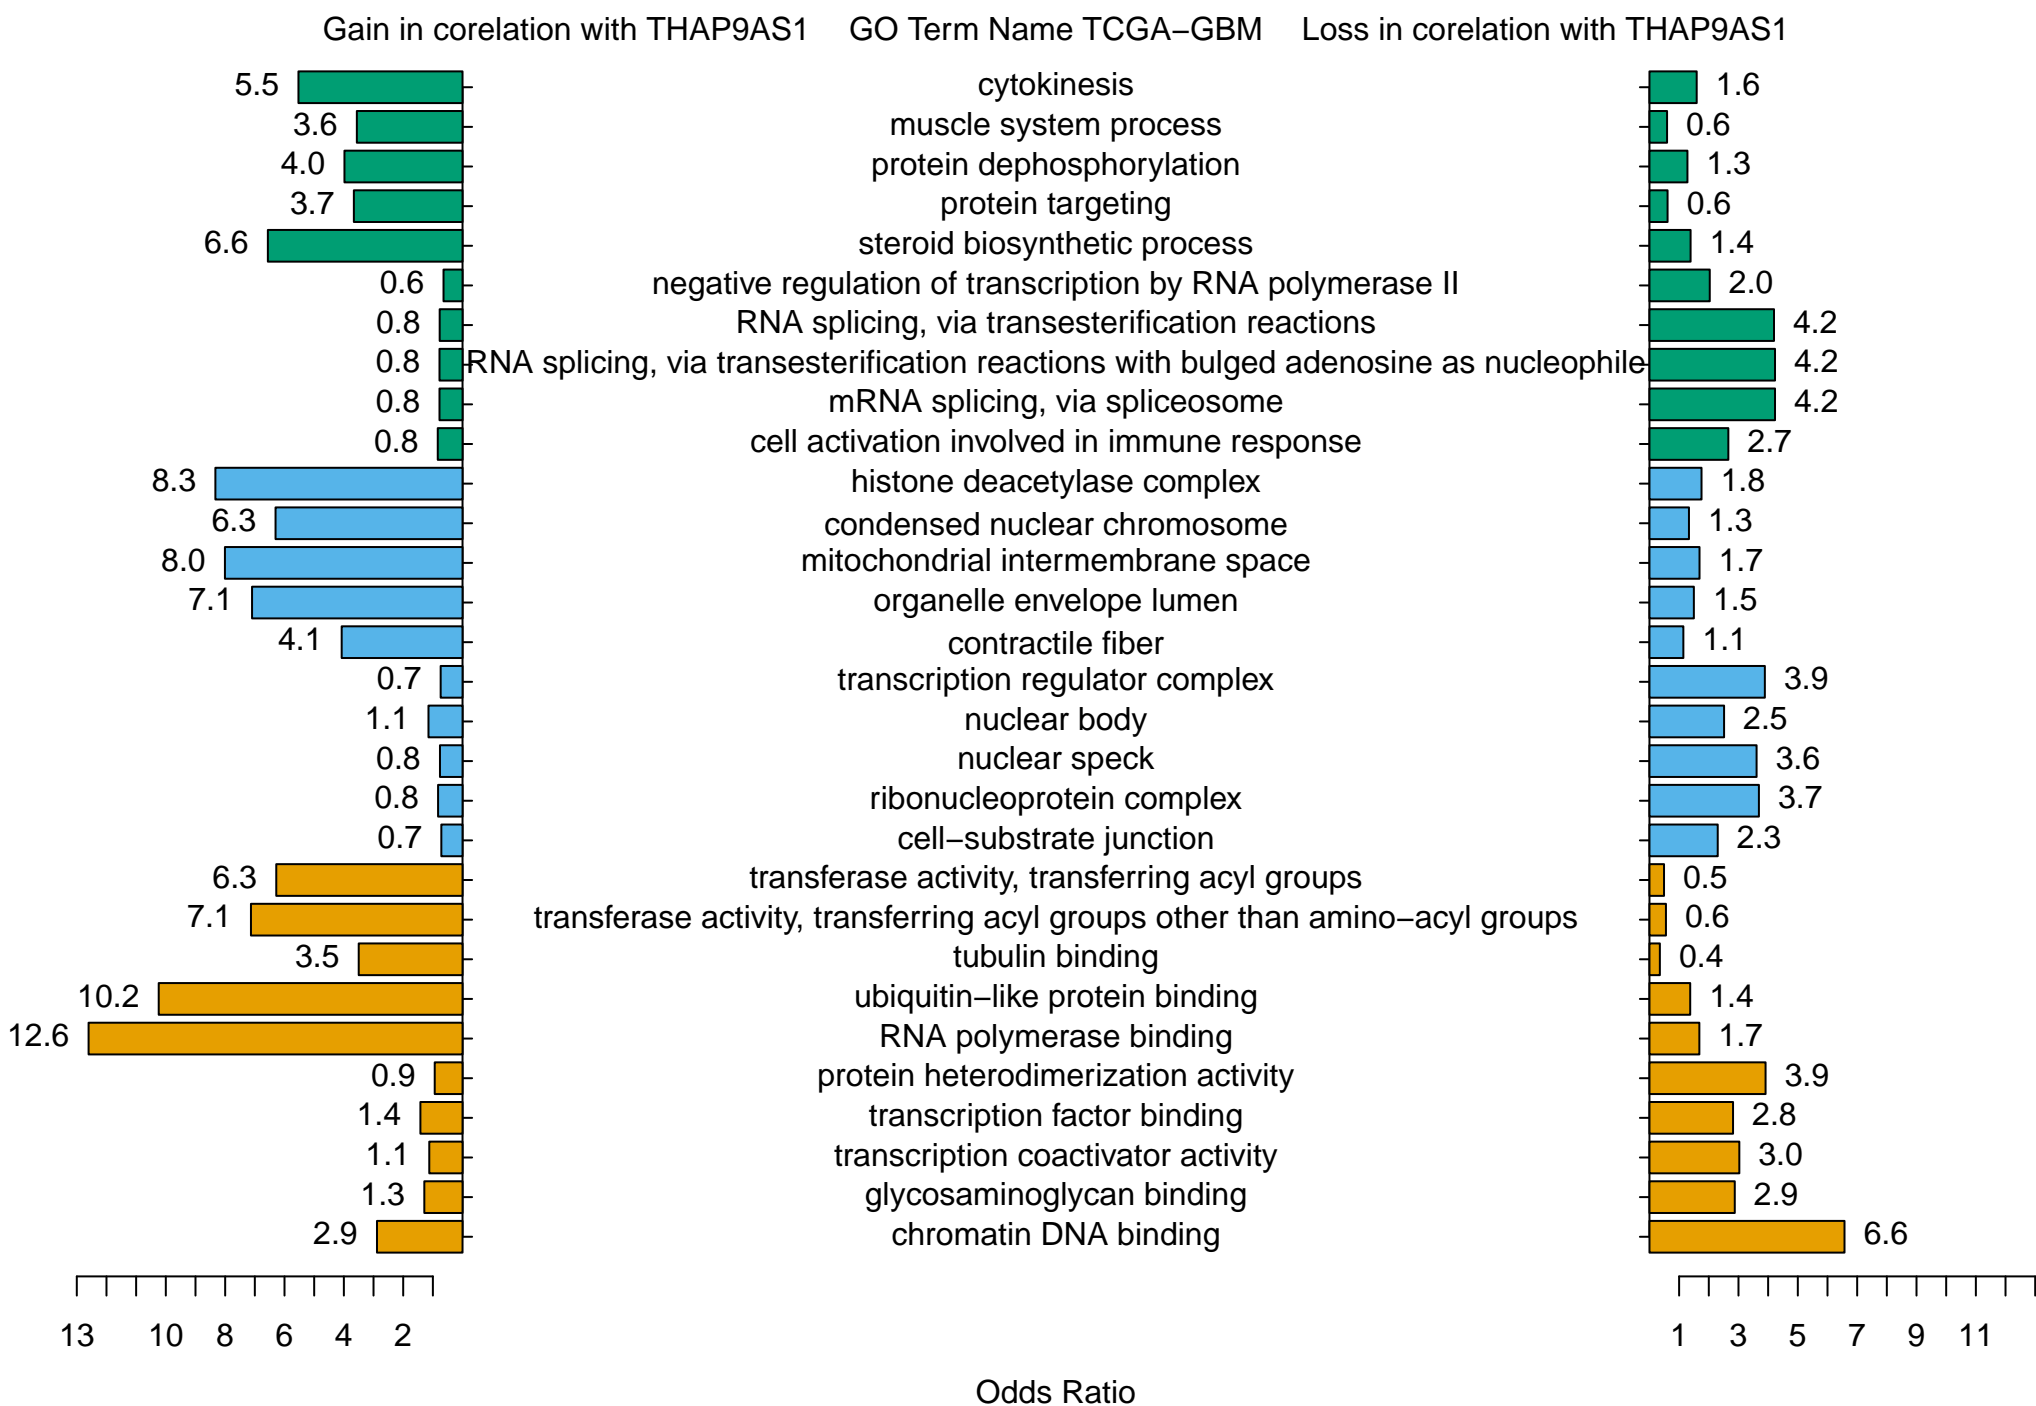

Gain in correlation with THAP9AS1    GO Term Name TCGA-HNSC    Loss in correlation with THAP9AS1

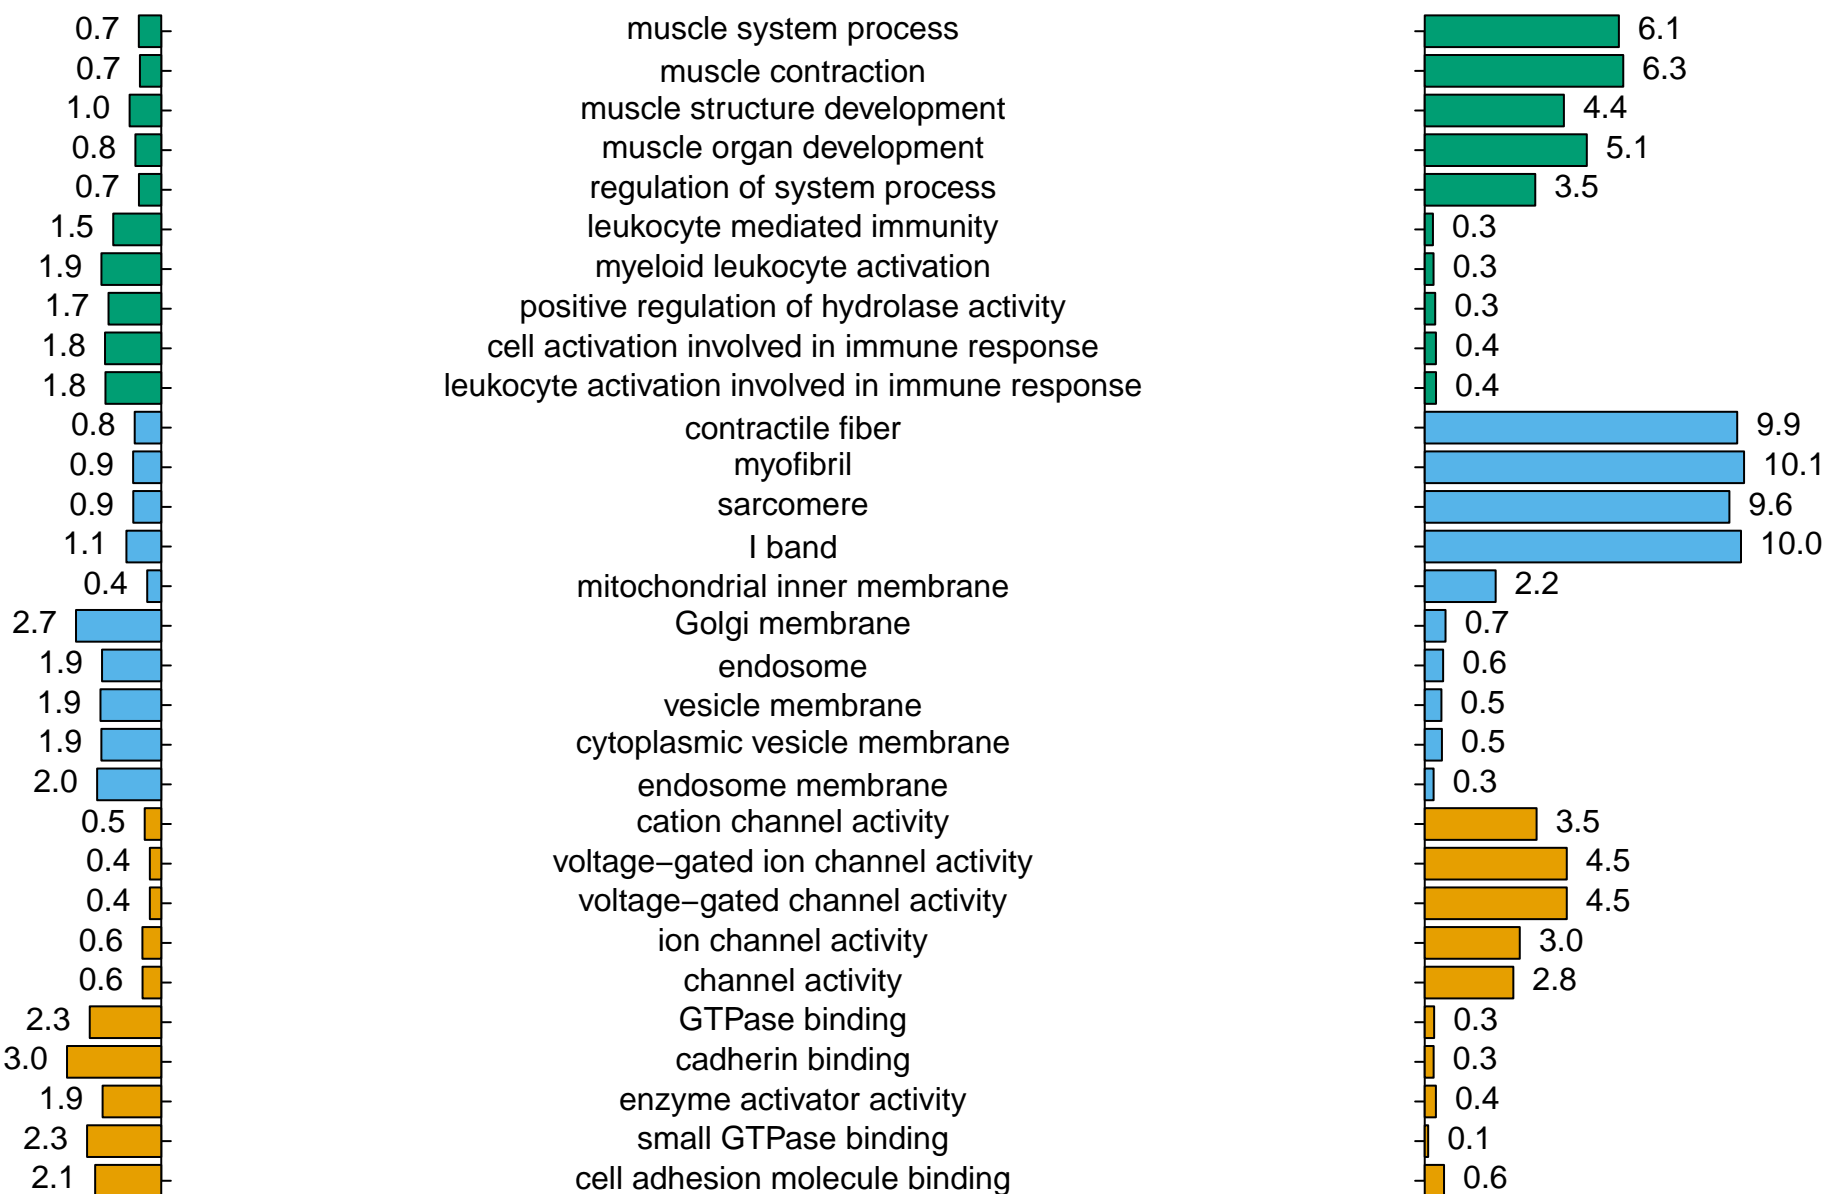

11 9 7 5 3 1

1 3 5 7 9 11

Odds Ratio

Gain in correlation with THAP9AS1

GO Term Name TCGA-KICH

Loss in correlation with THAP9AS1

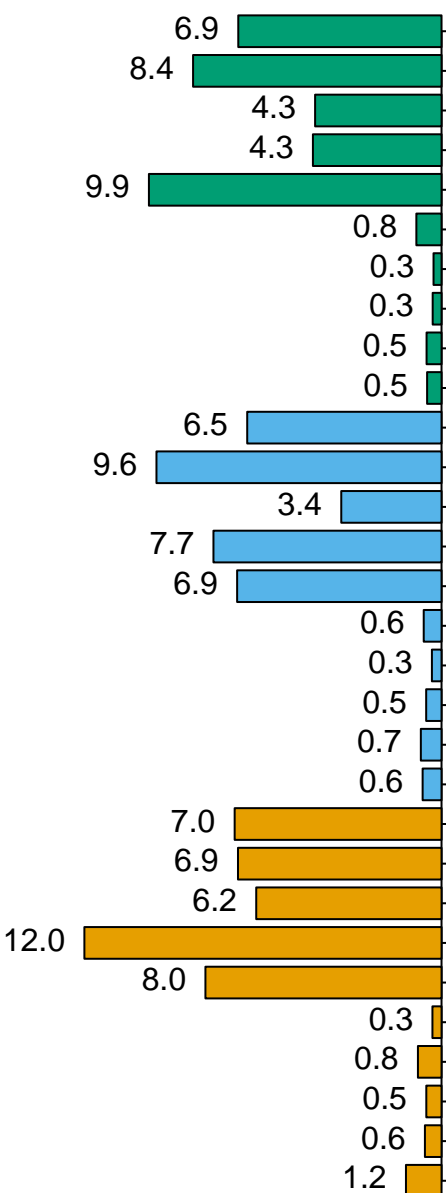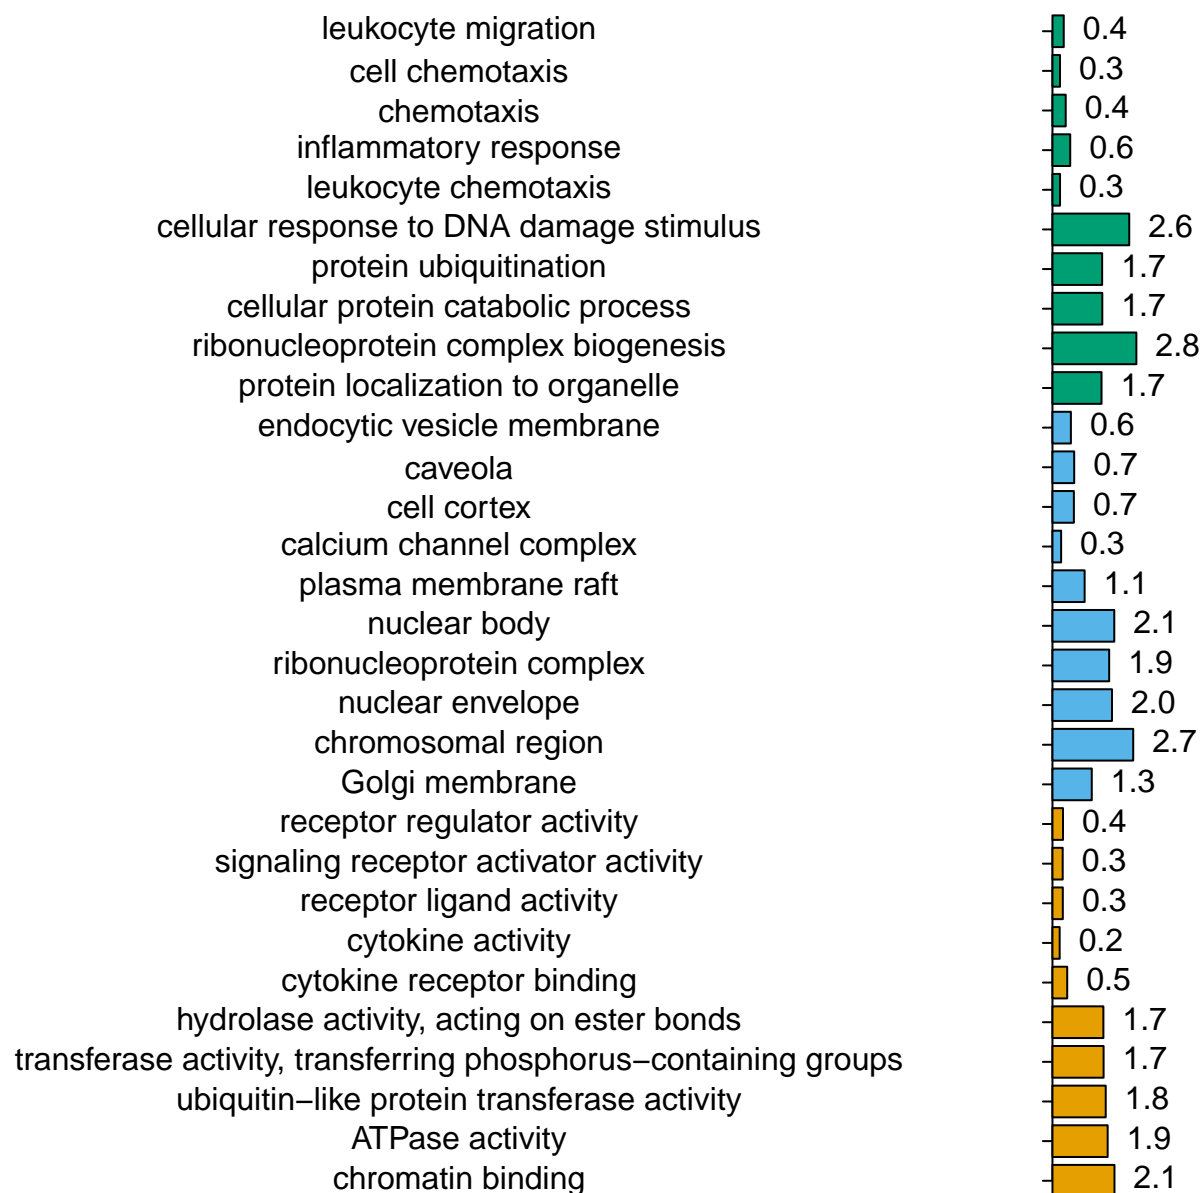

13 10 8 6 4 2

1 3 5 7 9 11

Odds Ratio



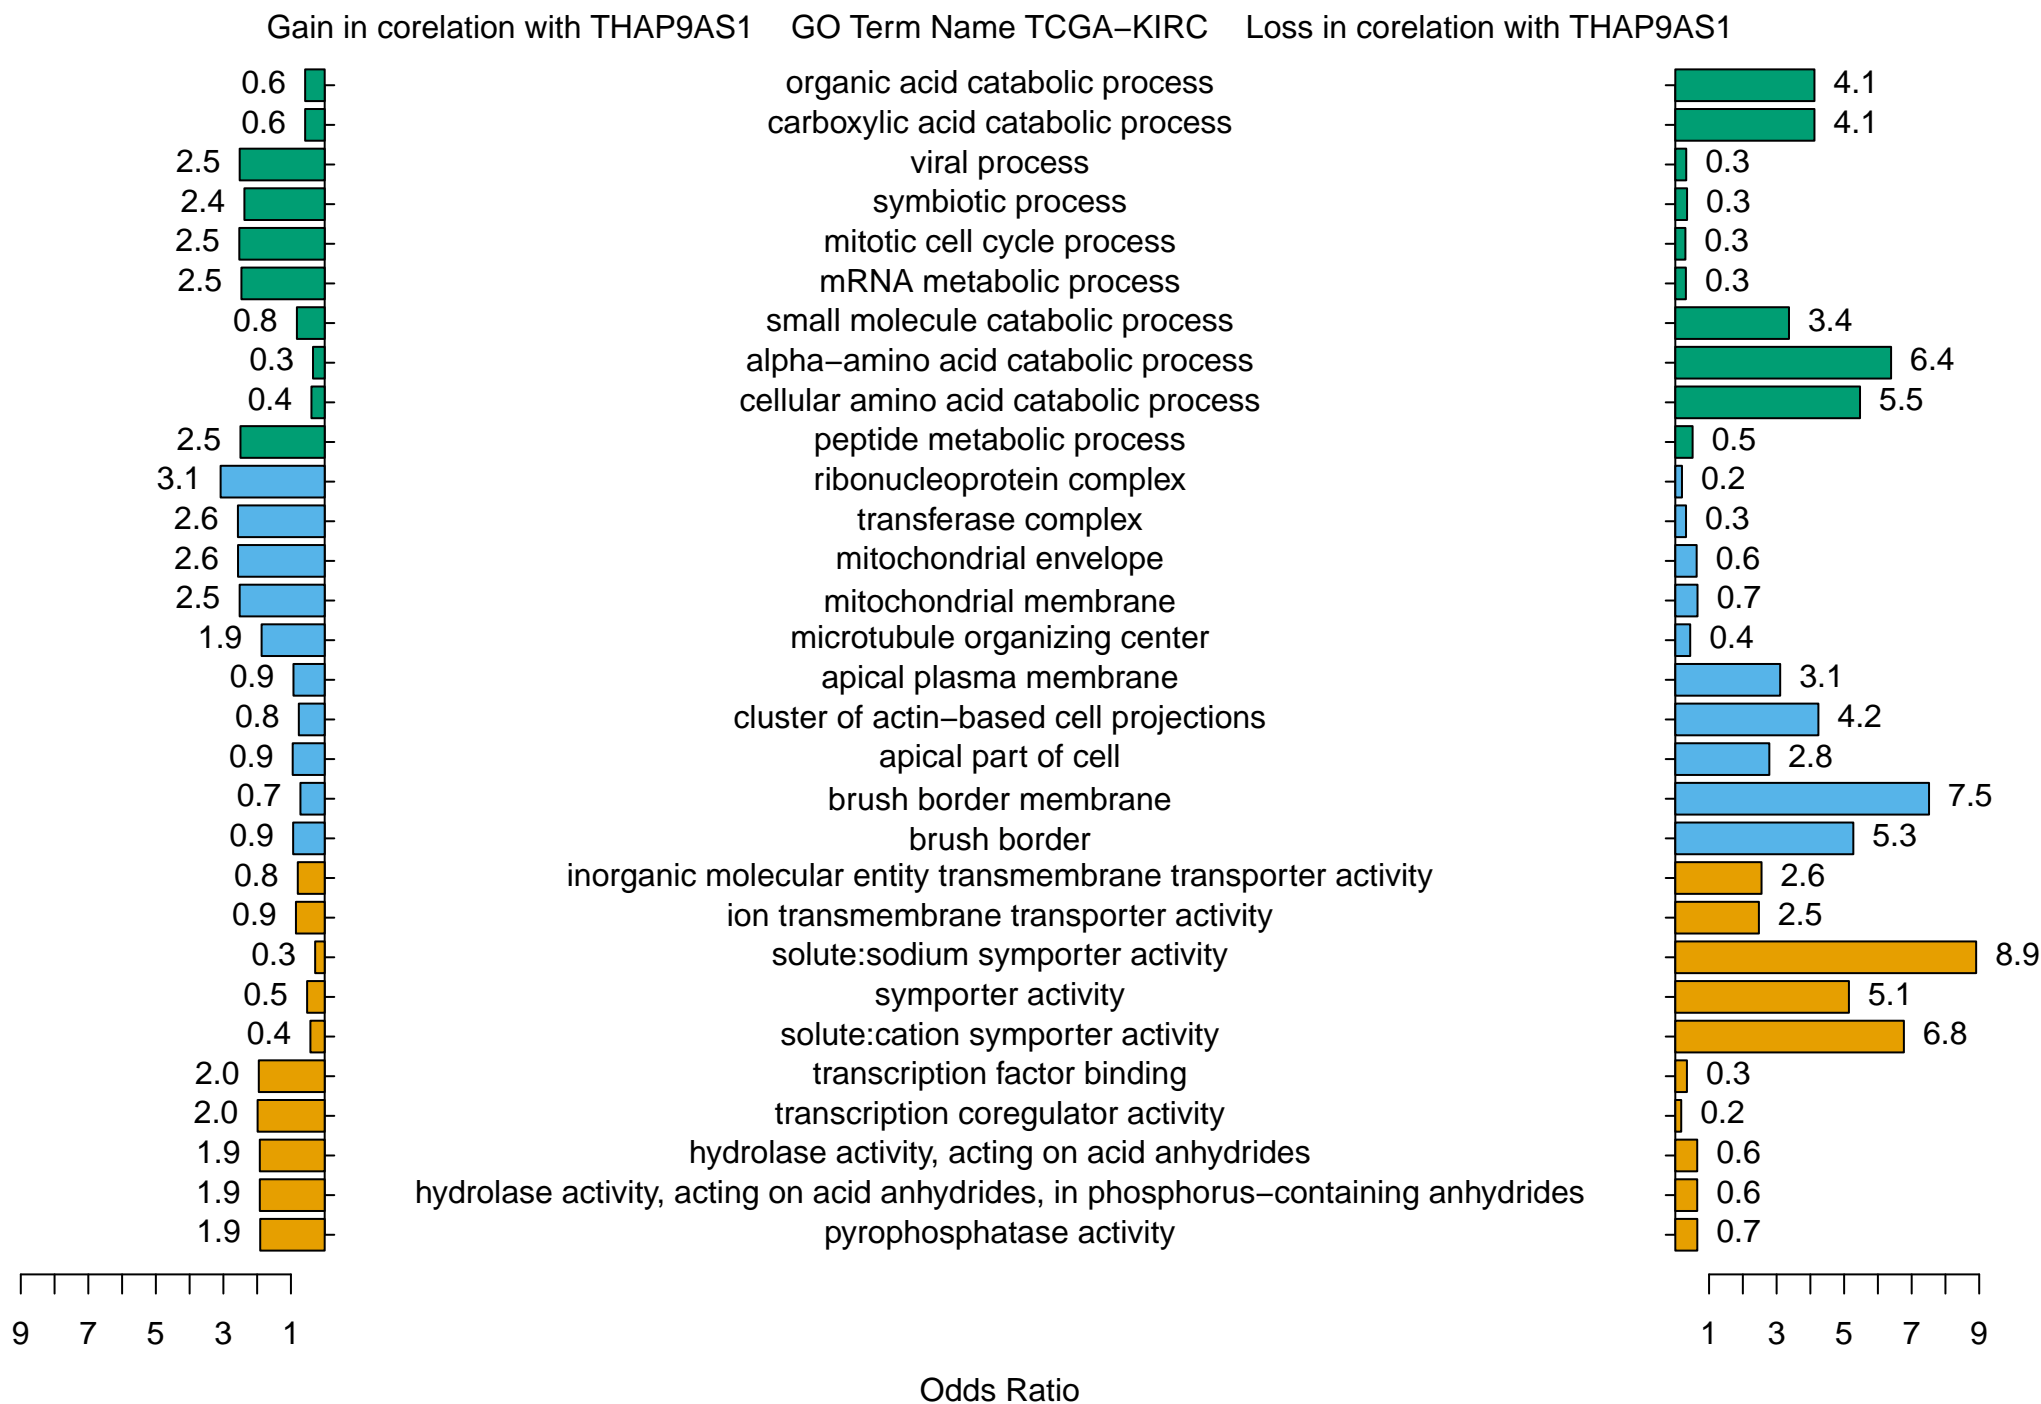

Gain in correlation with THAP9AS1    GO Term Name TCGA-KIRP    Loss in correlation with THAP9AS1

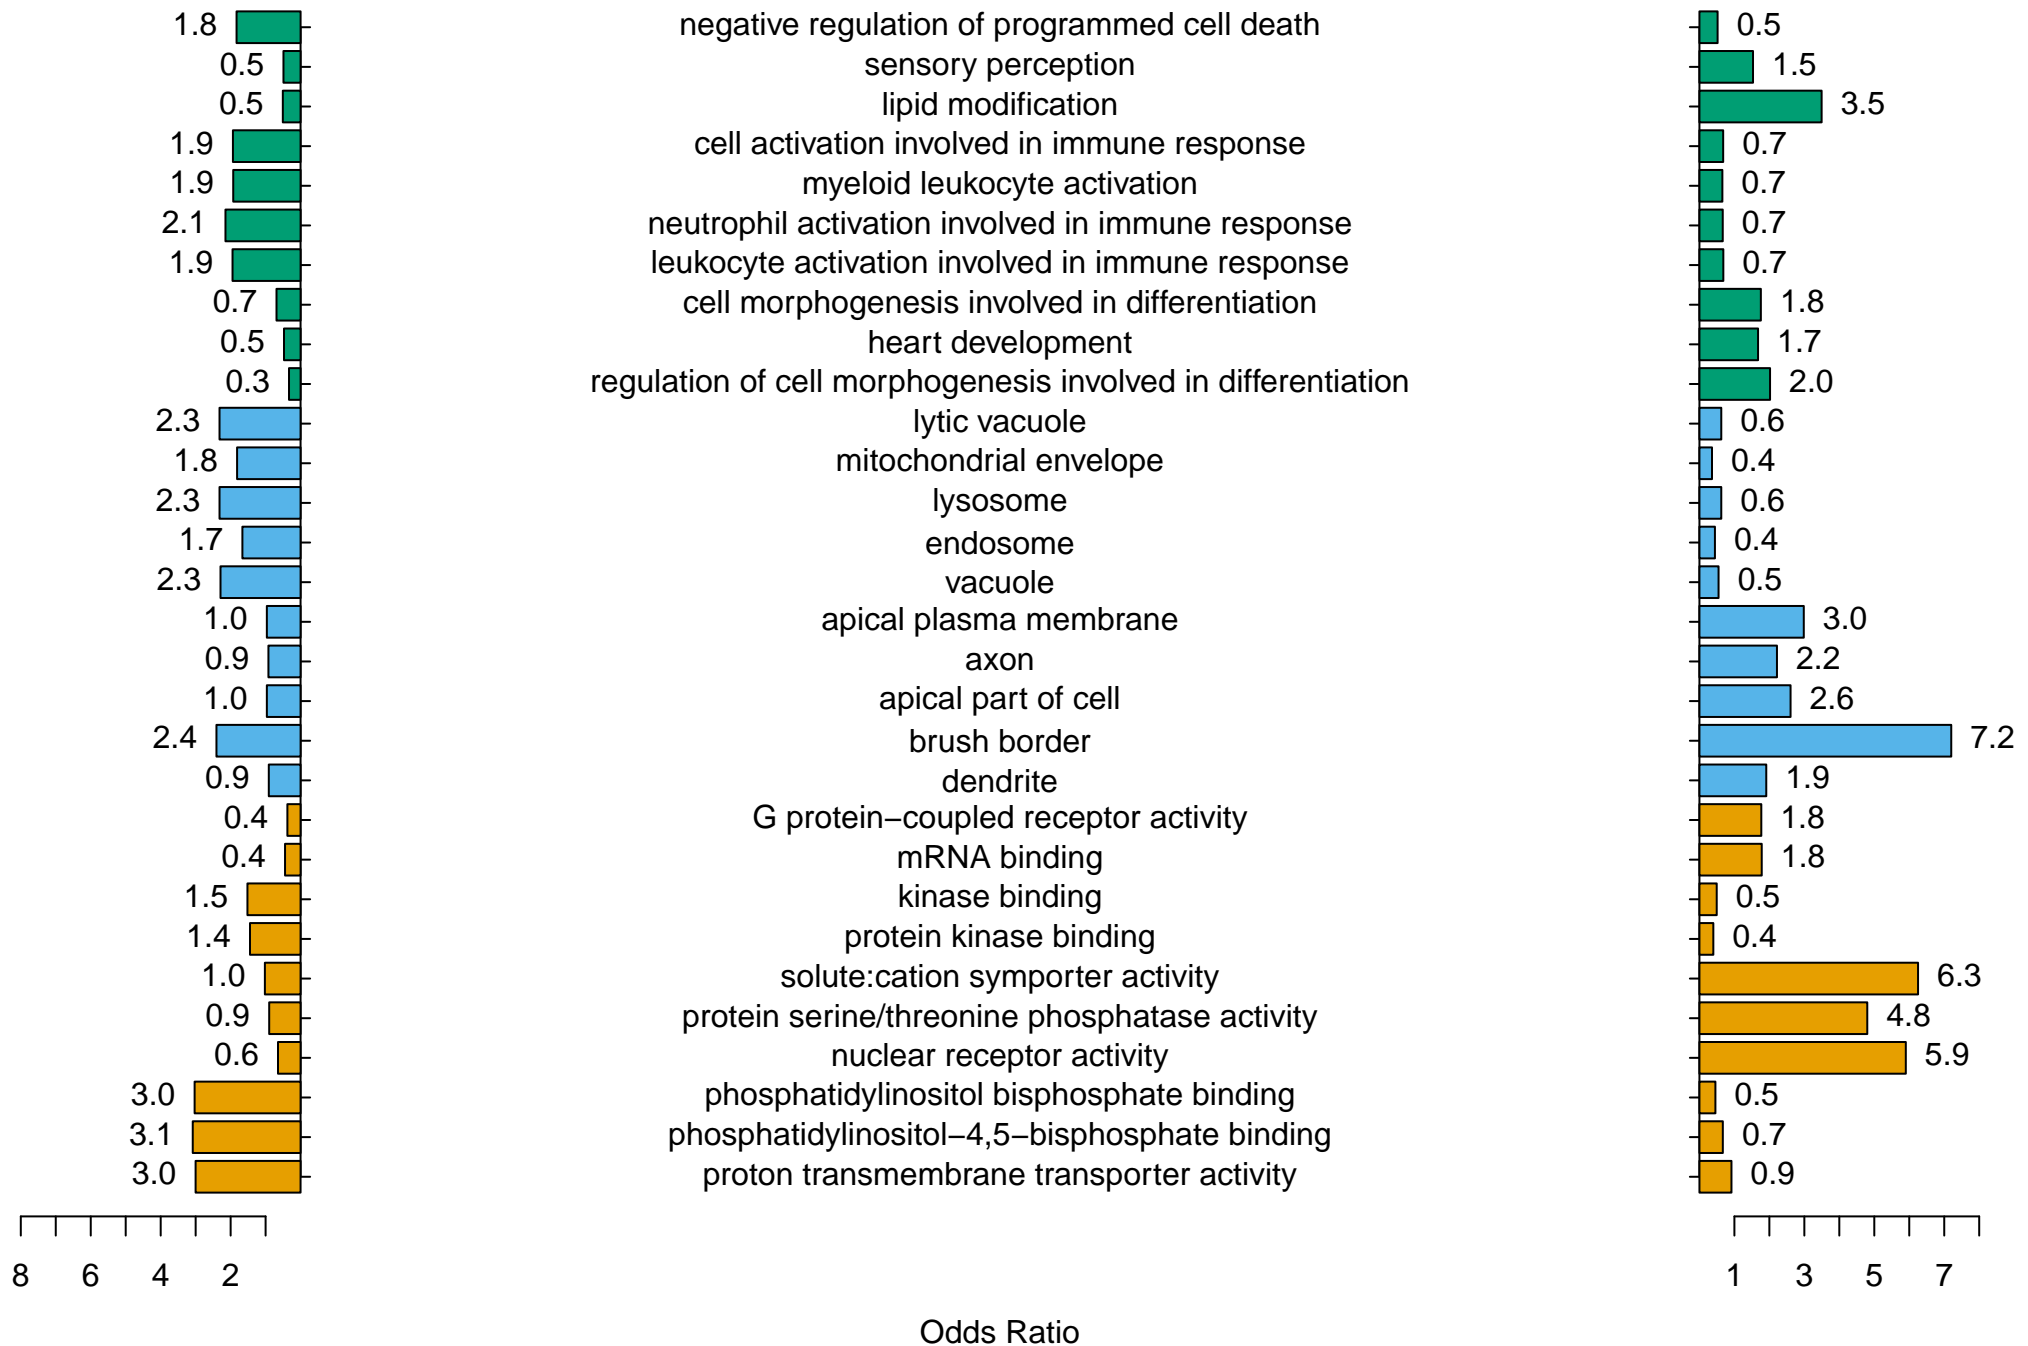

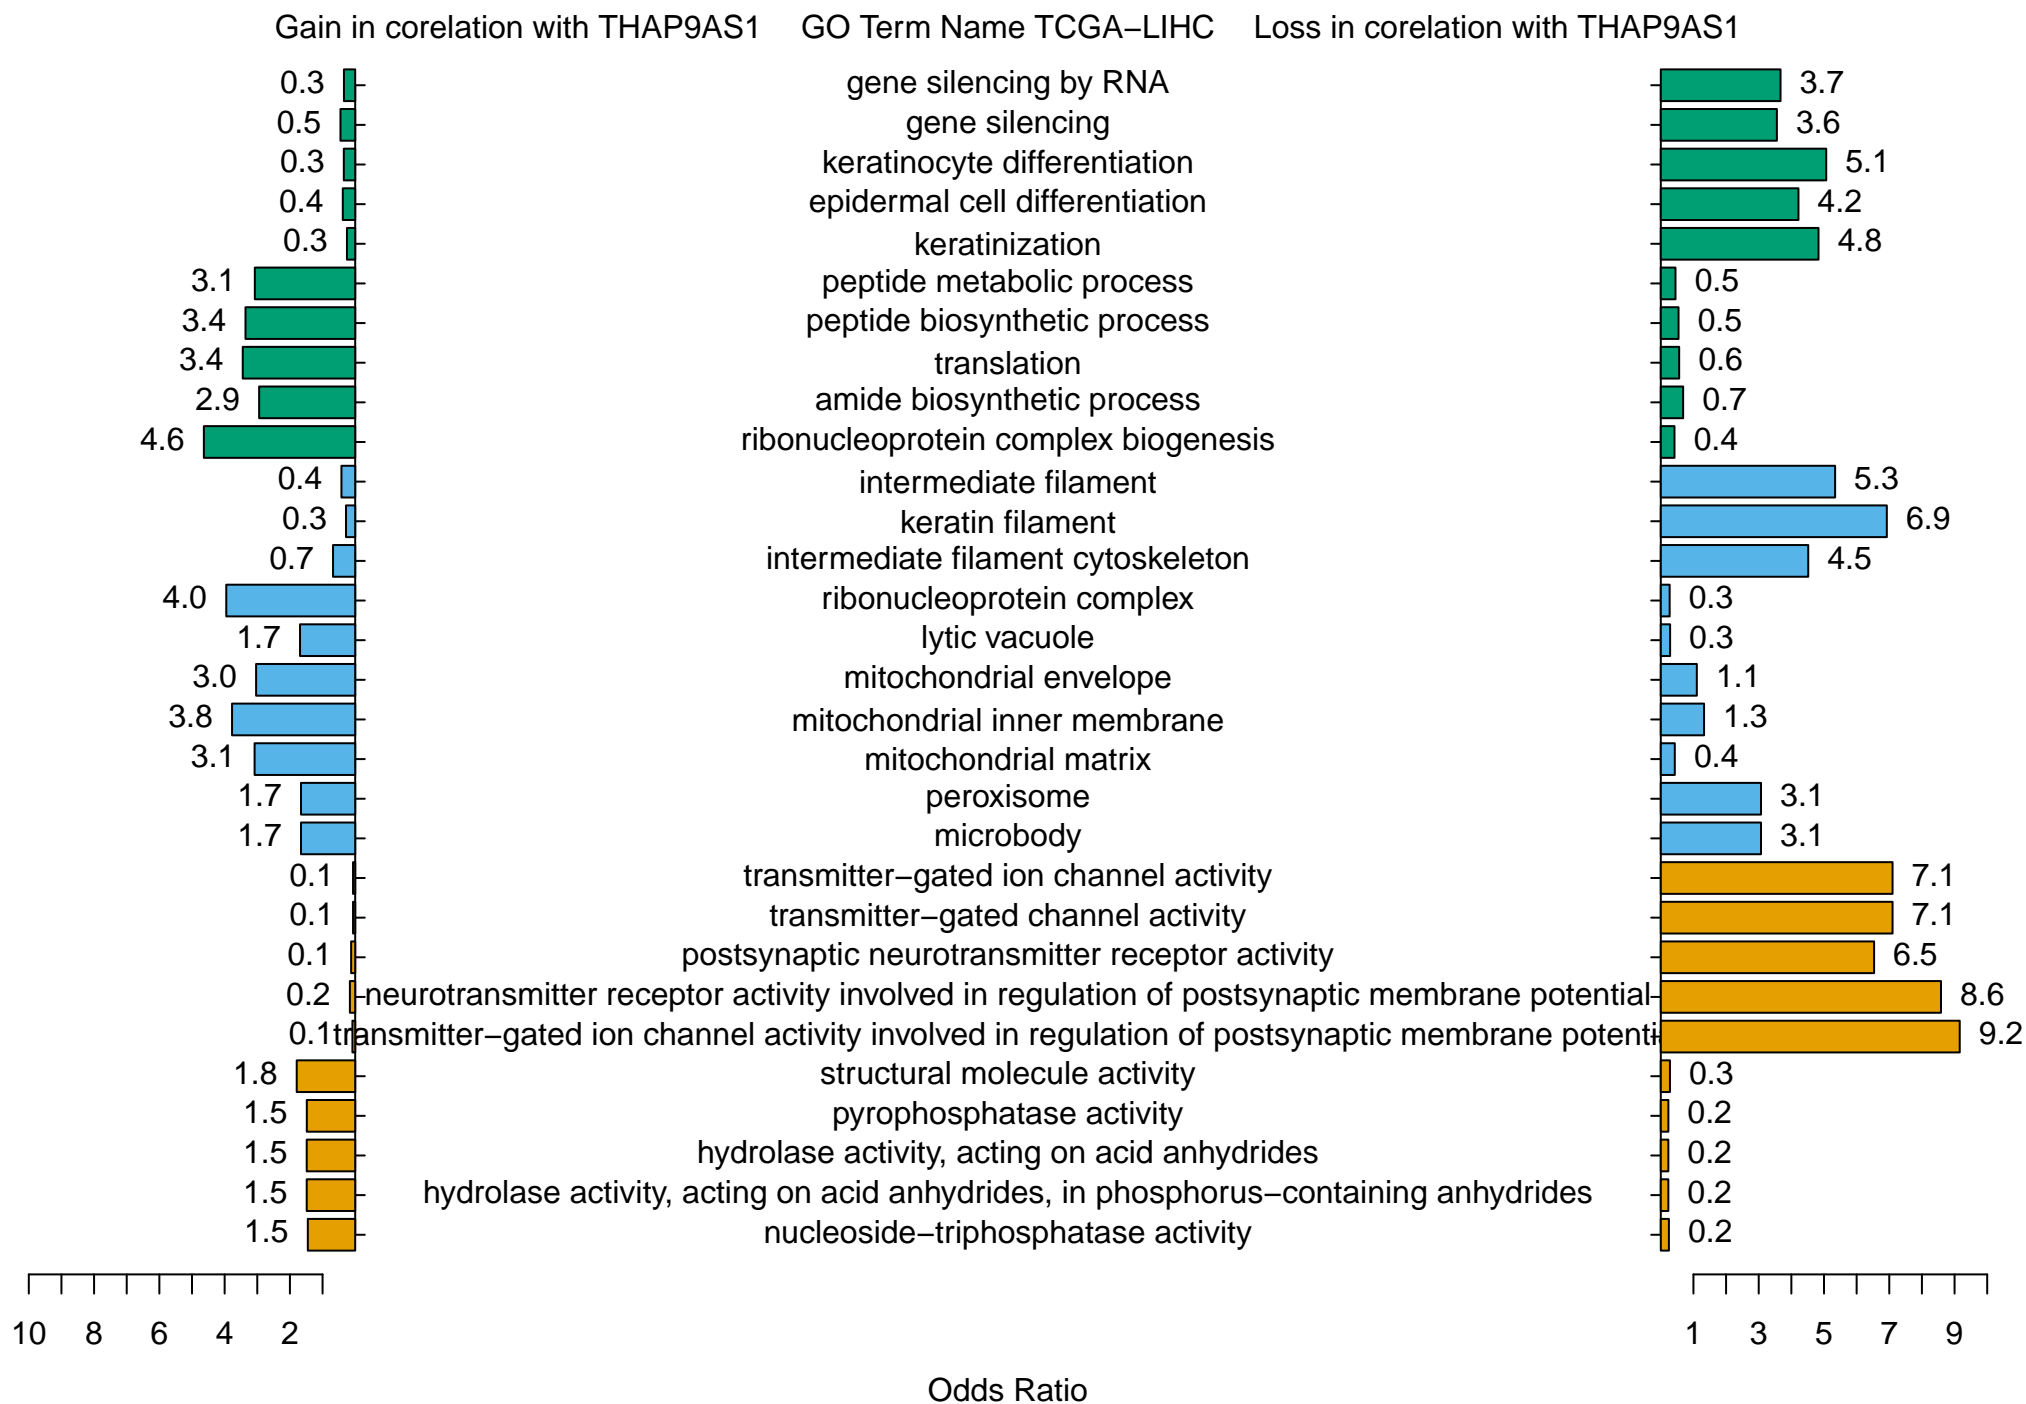

Gain in correlation with THAP9AS1    GO Term Name TCGA-LUAD    Loss in correlation with THAP9AS1

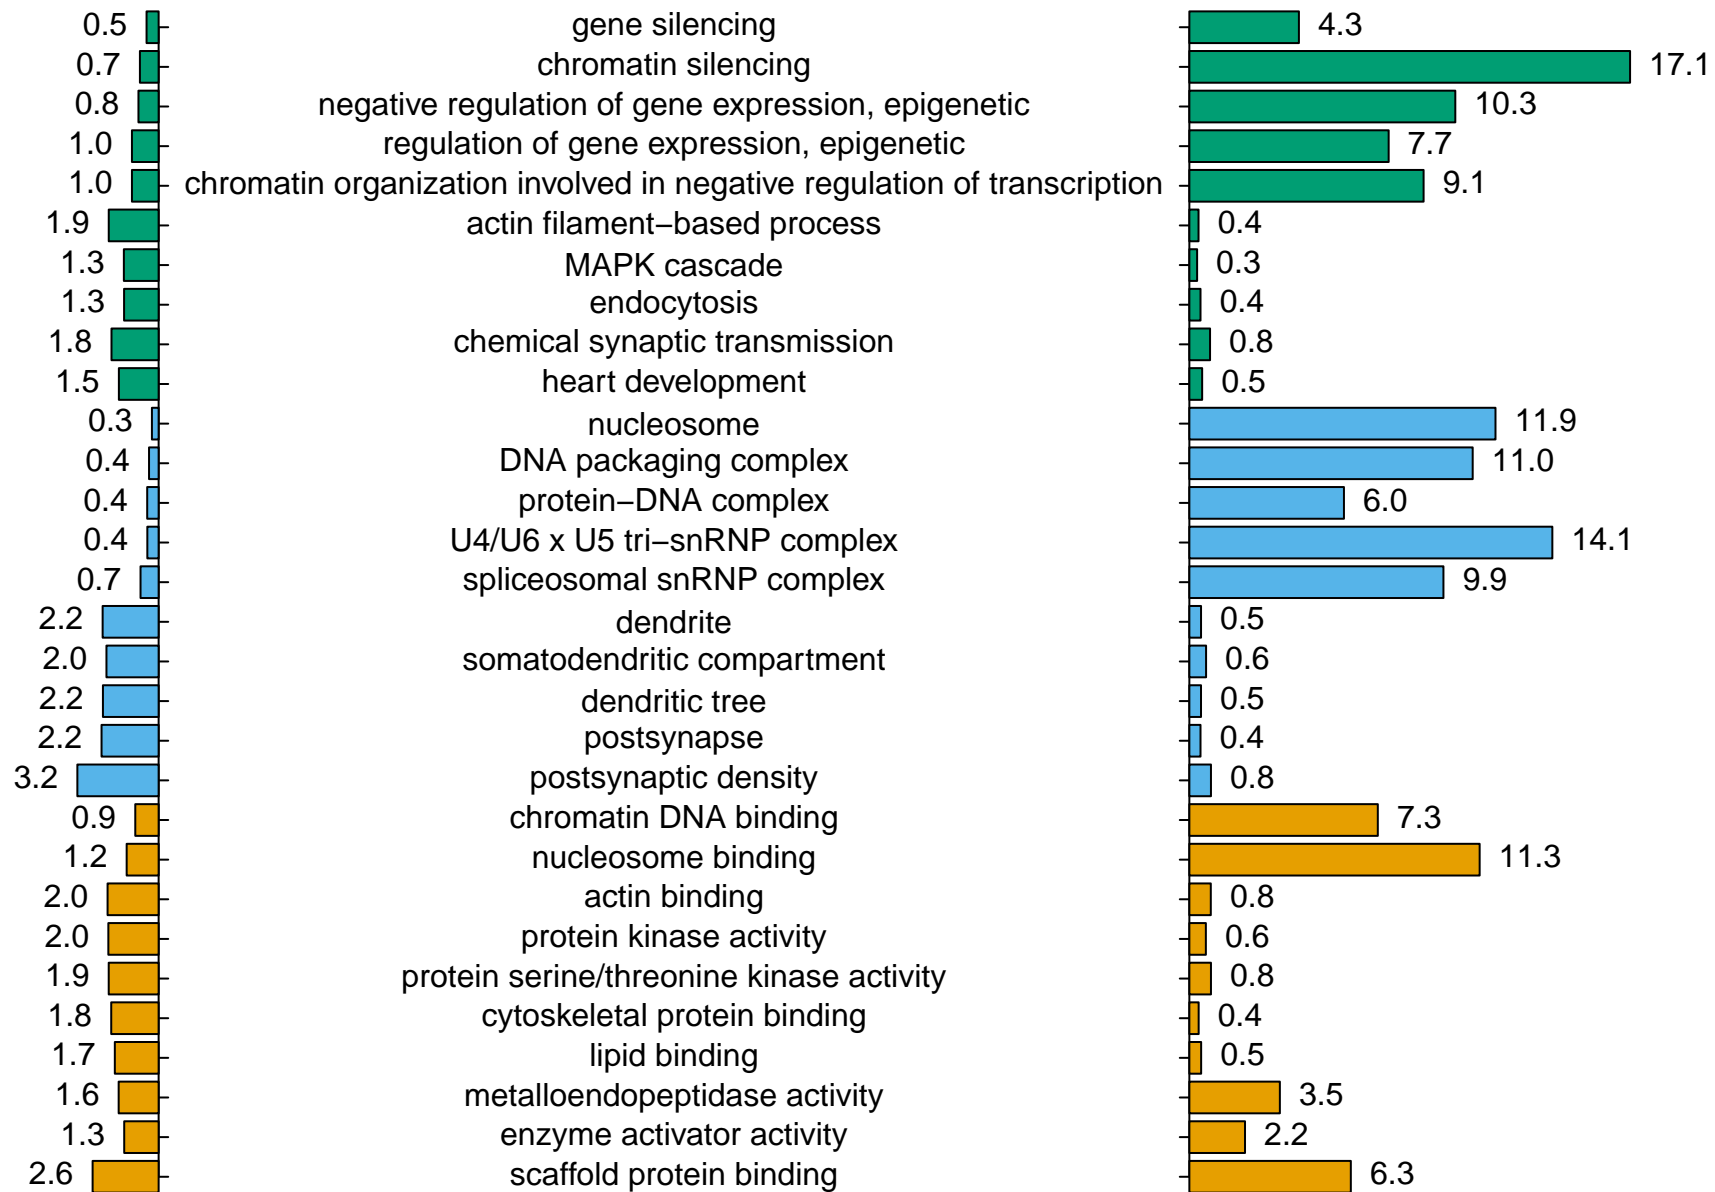

18 15 12 9 7 5 3 1

Odds Ratio

1 3 5 7 9 12 15 18

Gain in correlation with THAP9AS1    GO Term Name TCGA-LUSC    Loss in correlation with THAP9AS1

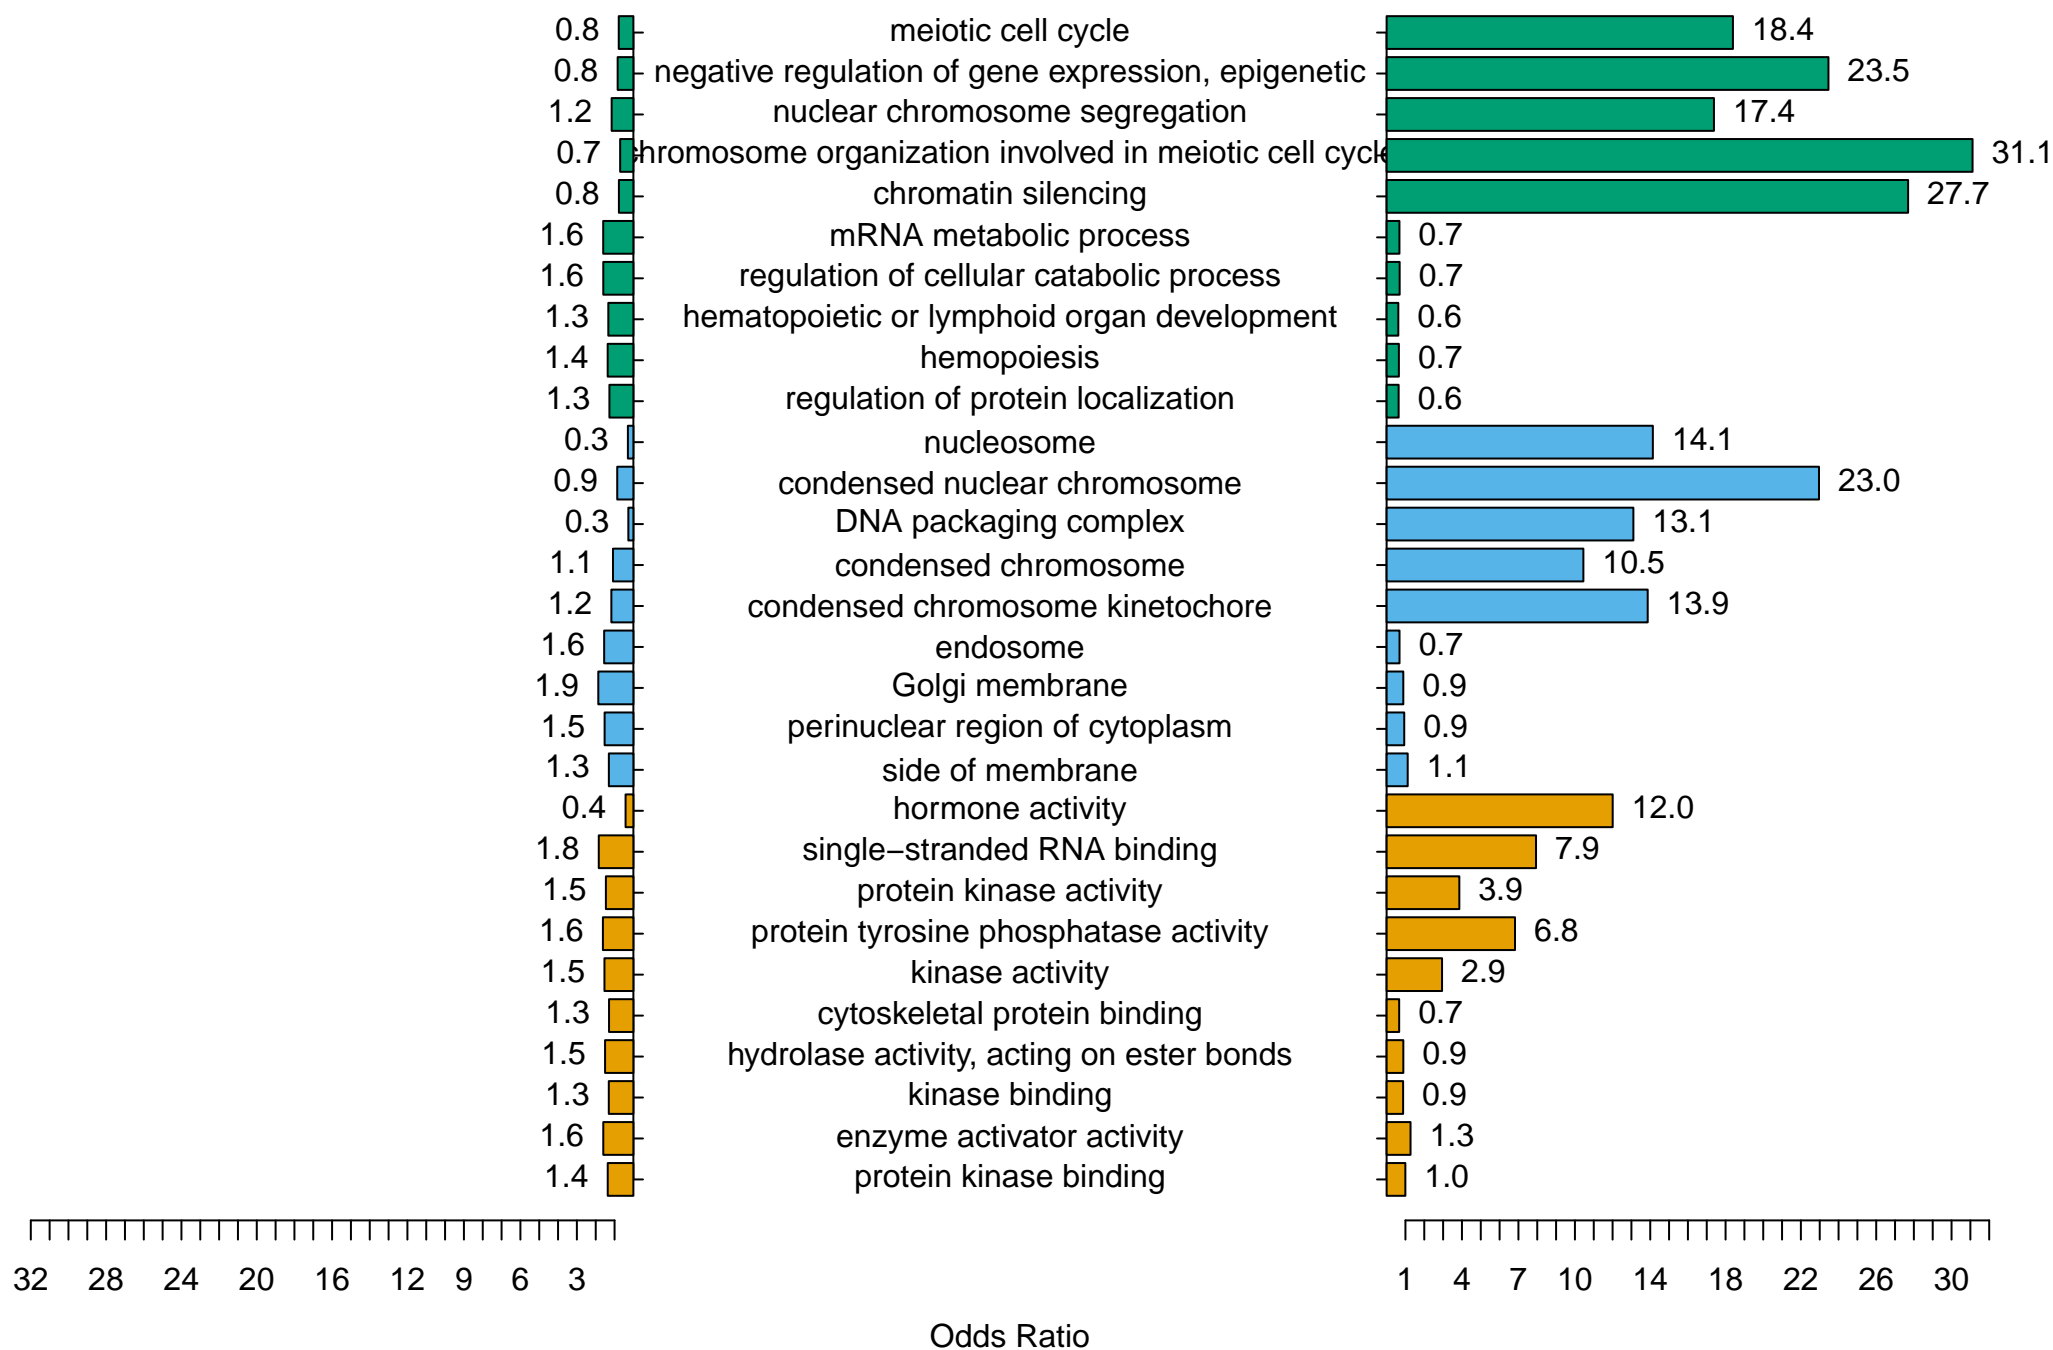

Gain in correlation with THAP9AS1    GO Term Name TCGA-PAAD    Loss in correlation with THAP9AS1

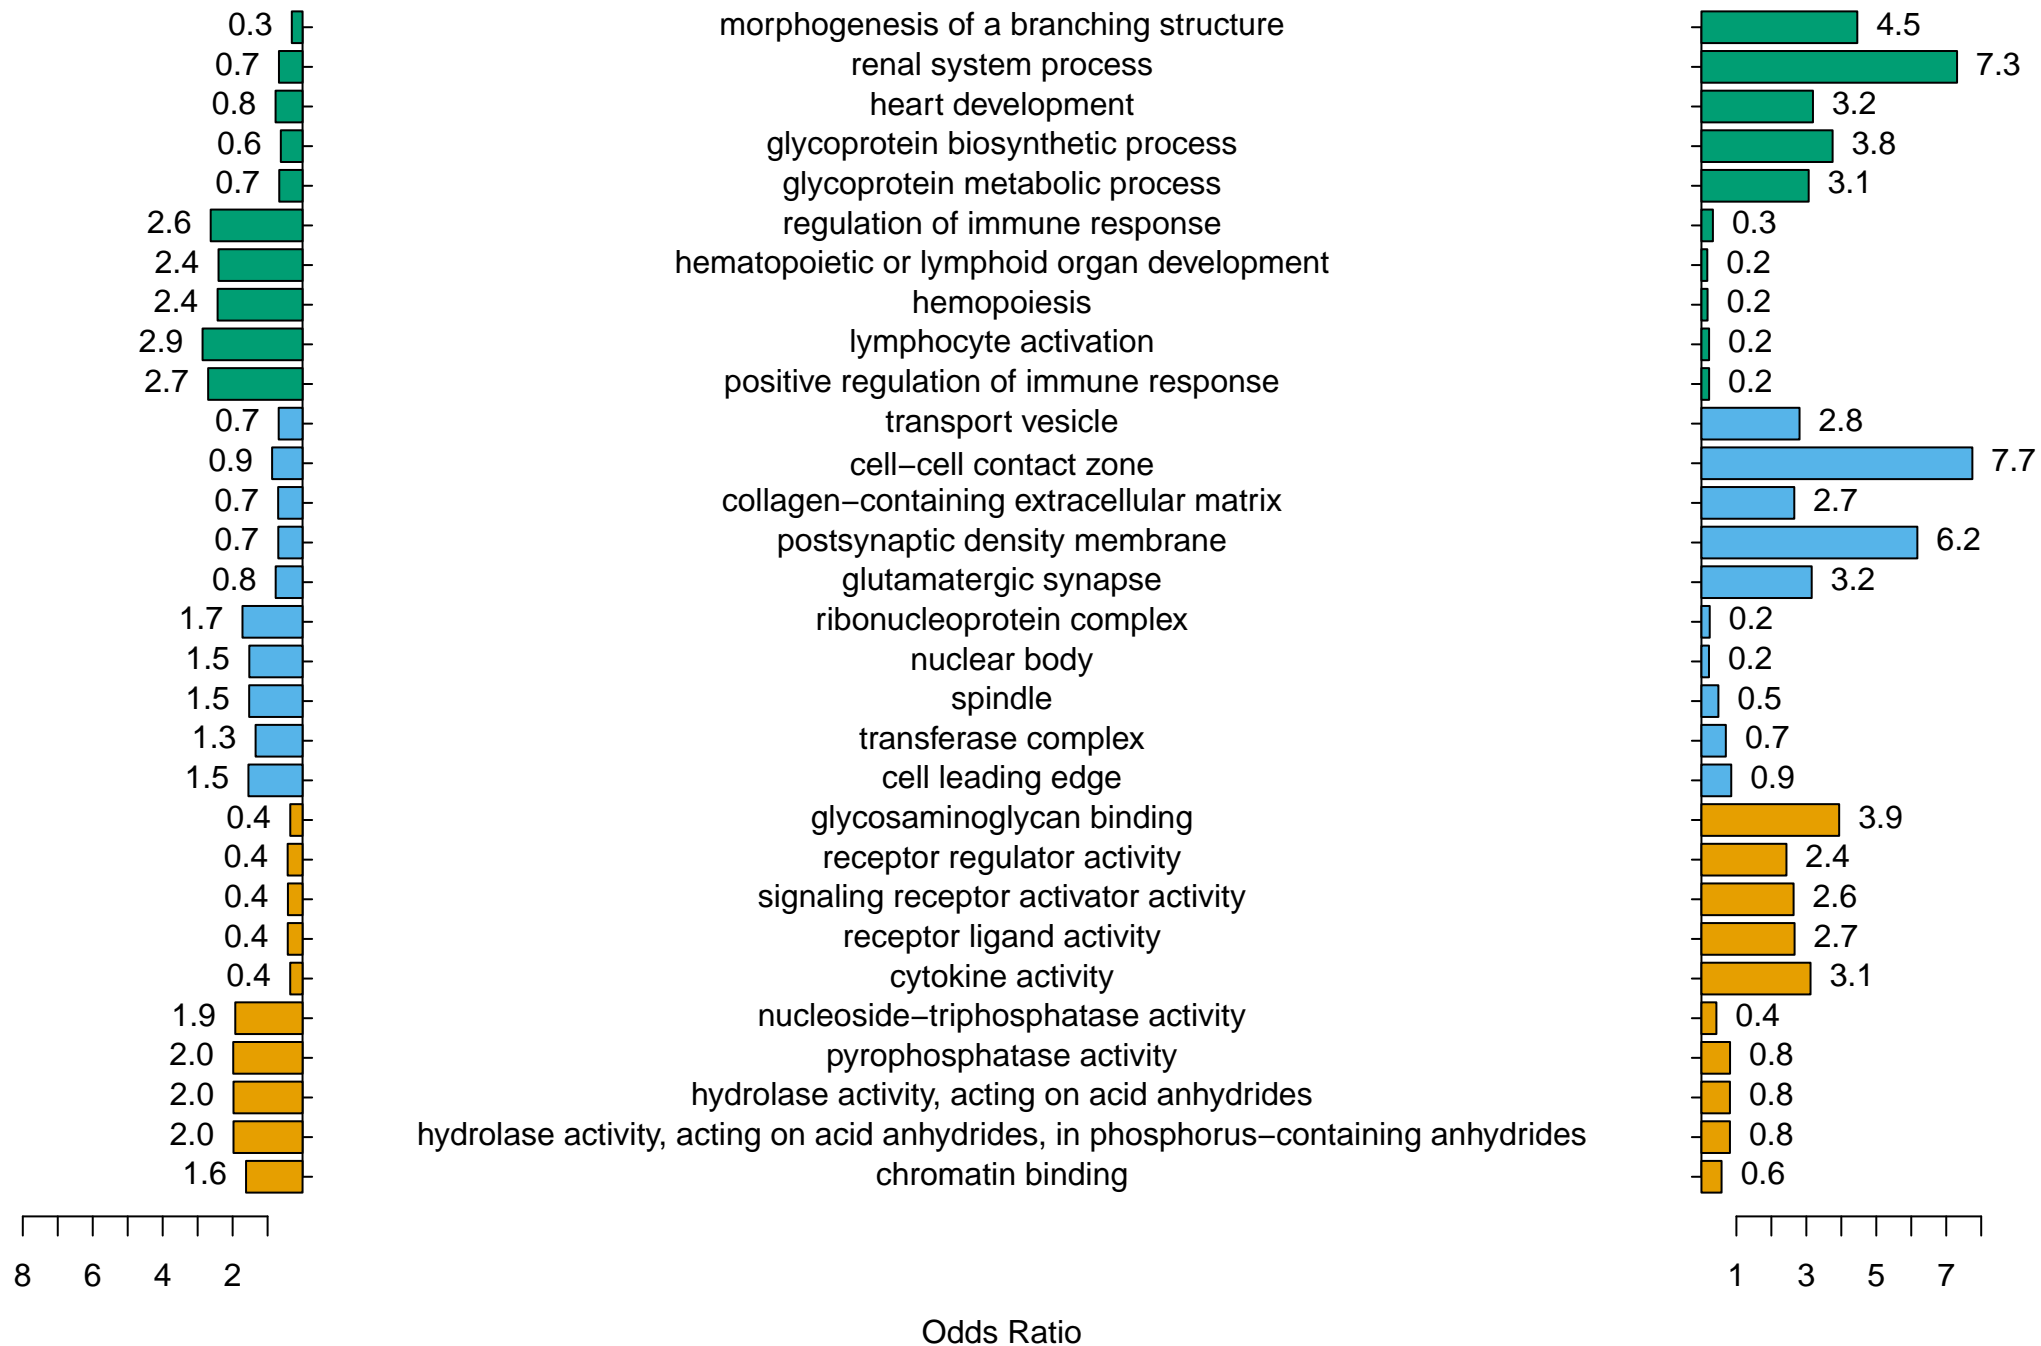

Gain in correlation with THAP9AS1    GO Term Name TCGA-PRAD    Loss in correlation with THAP9AS1

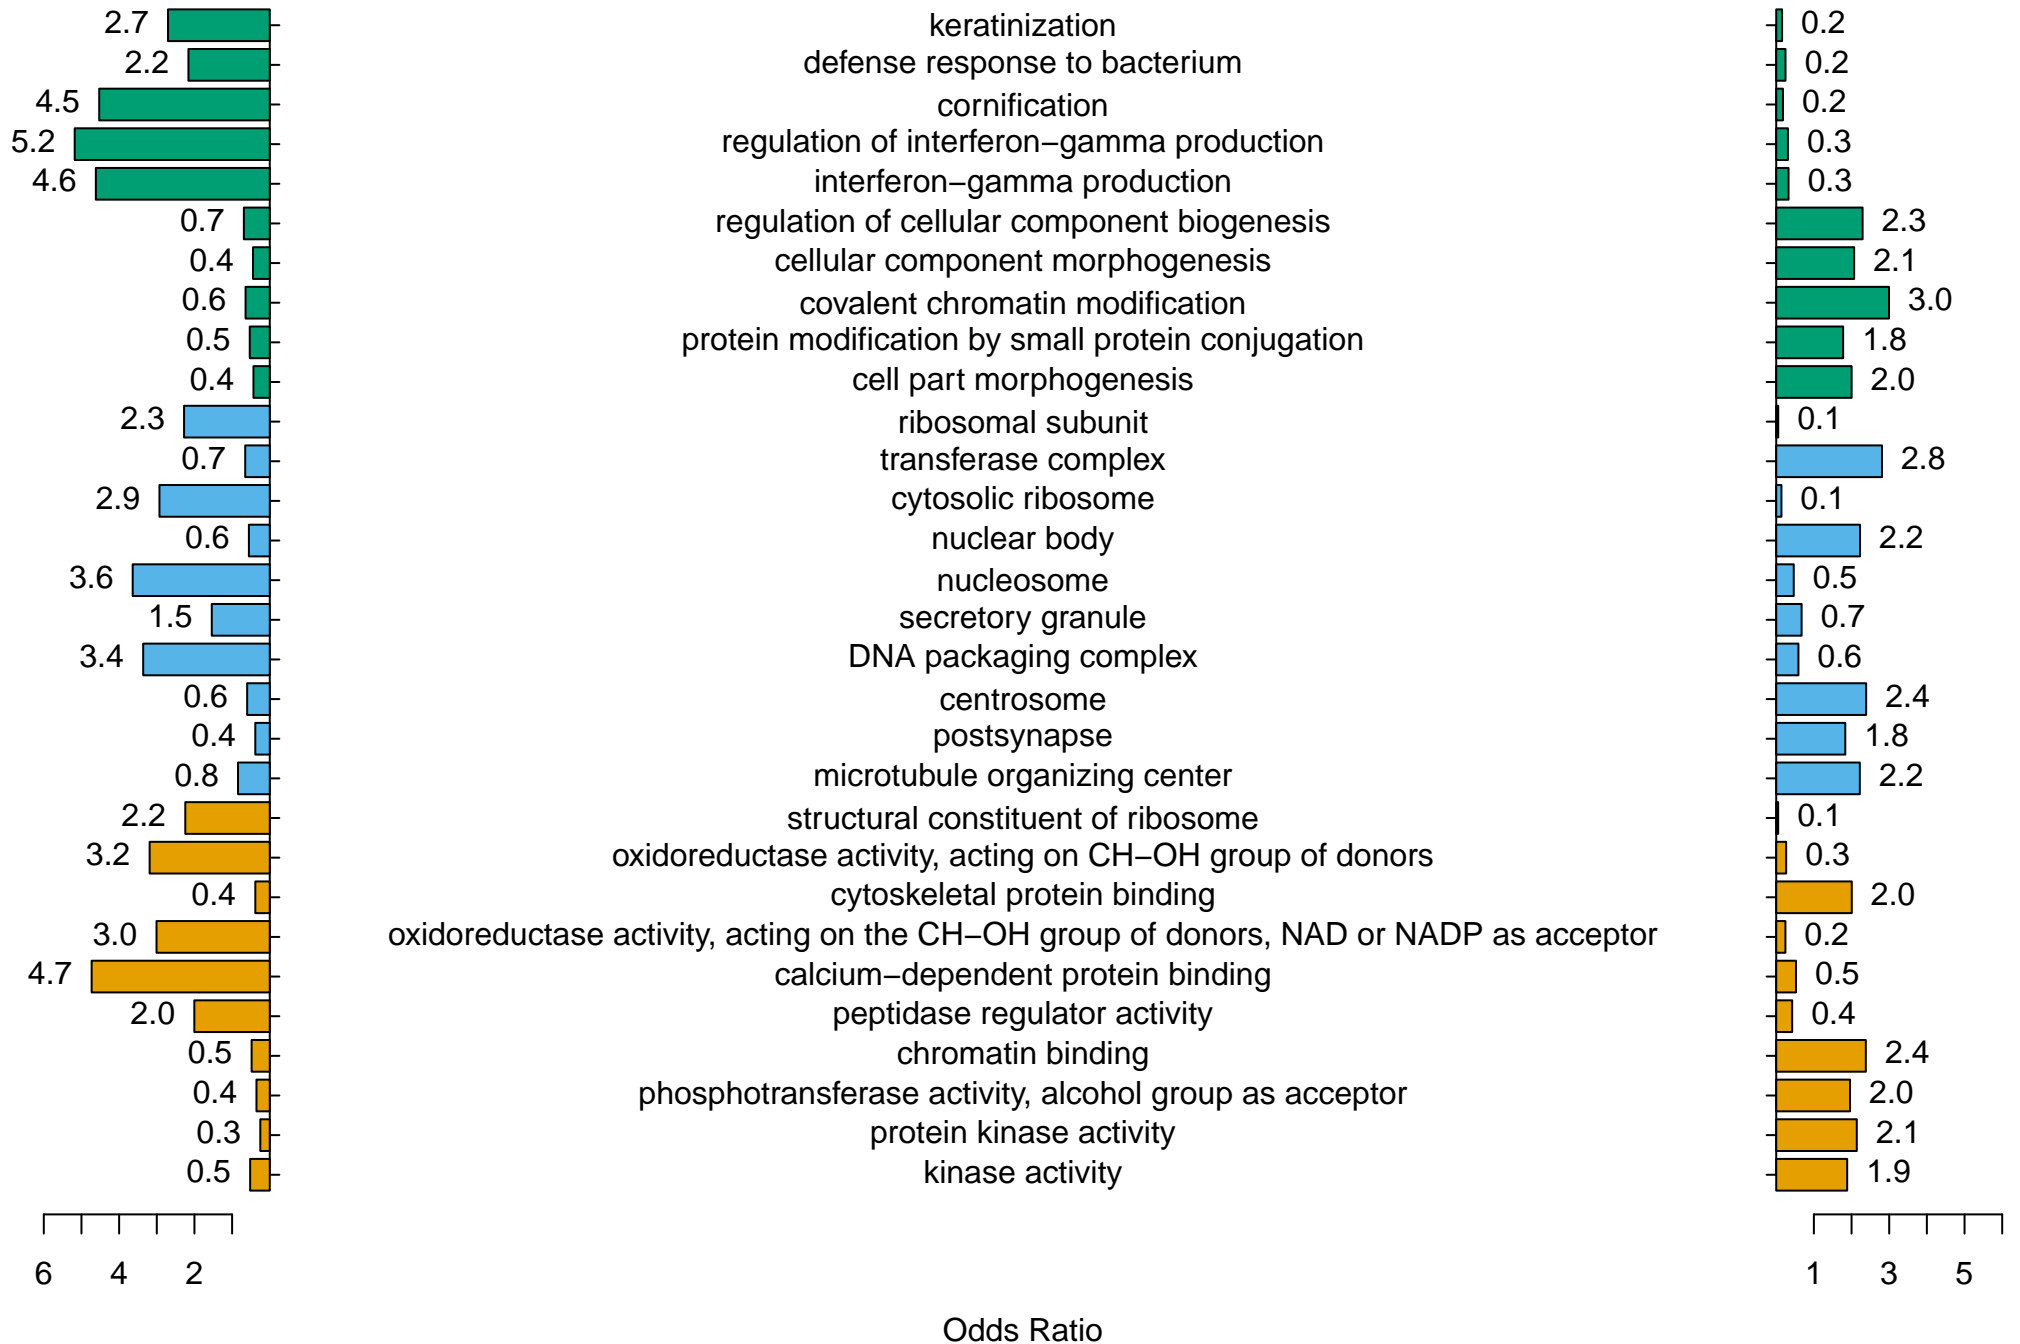

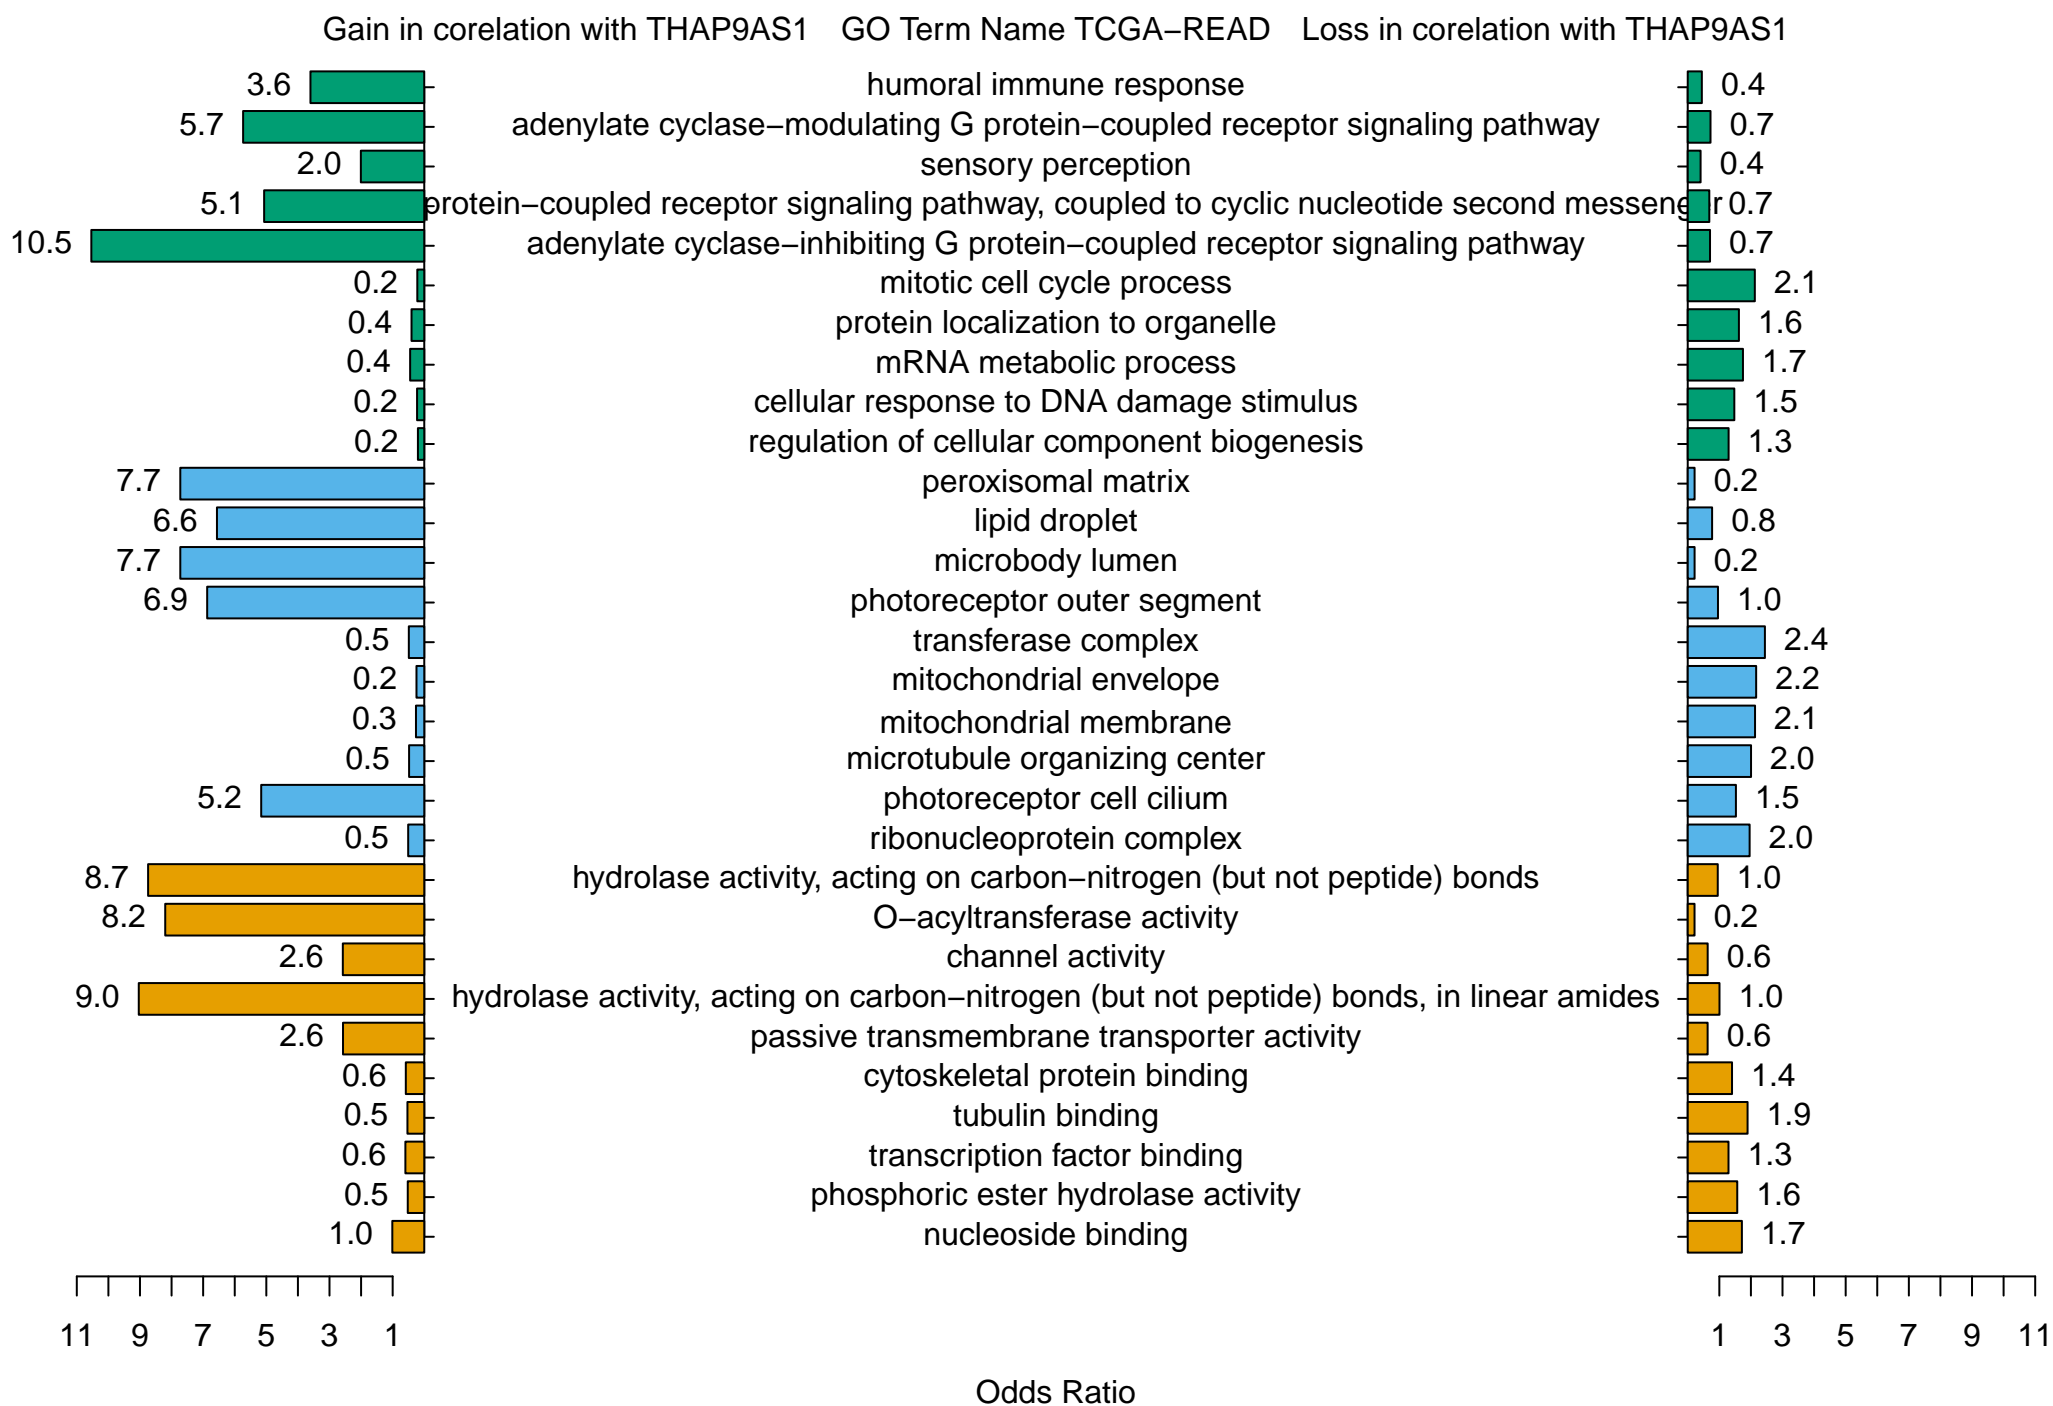



Gain in correlation with THAP9AS1    GO Term Name TCGA-STAD    Loss in correlation with THAP9AS1

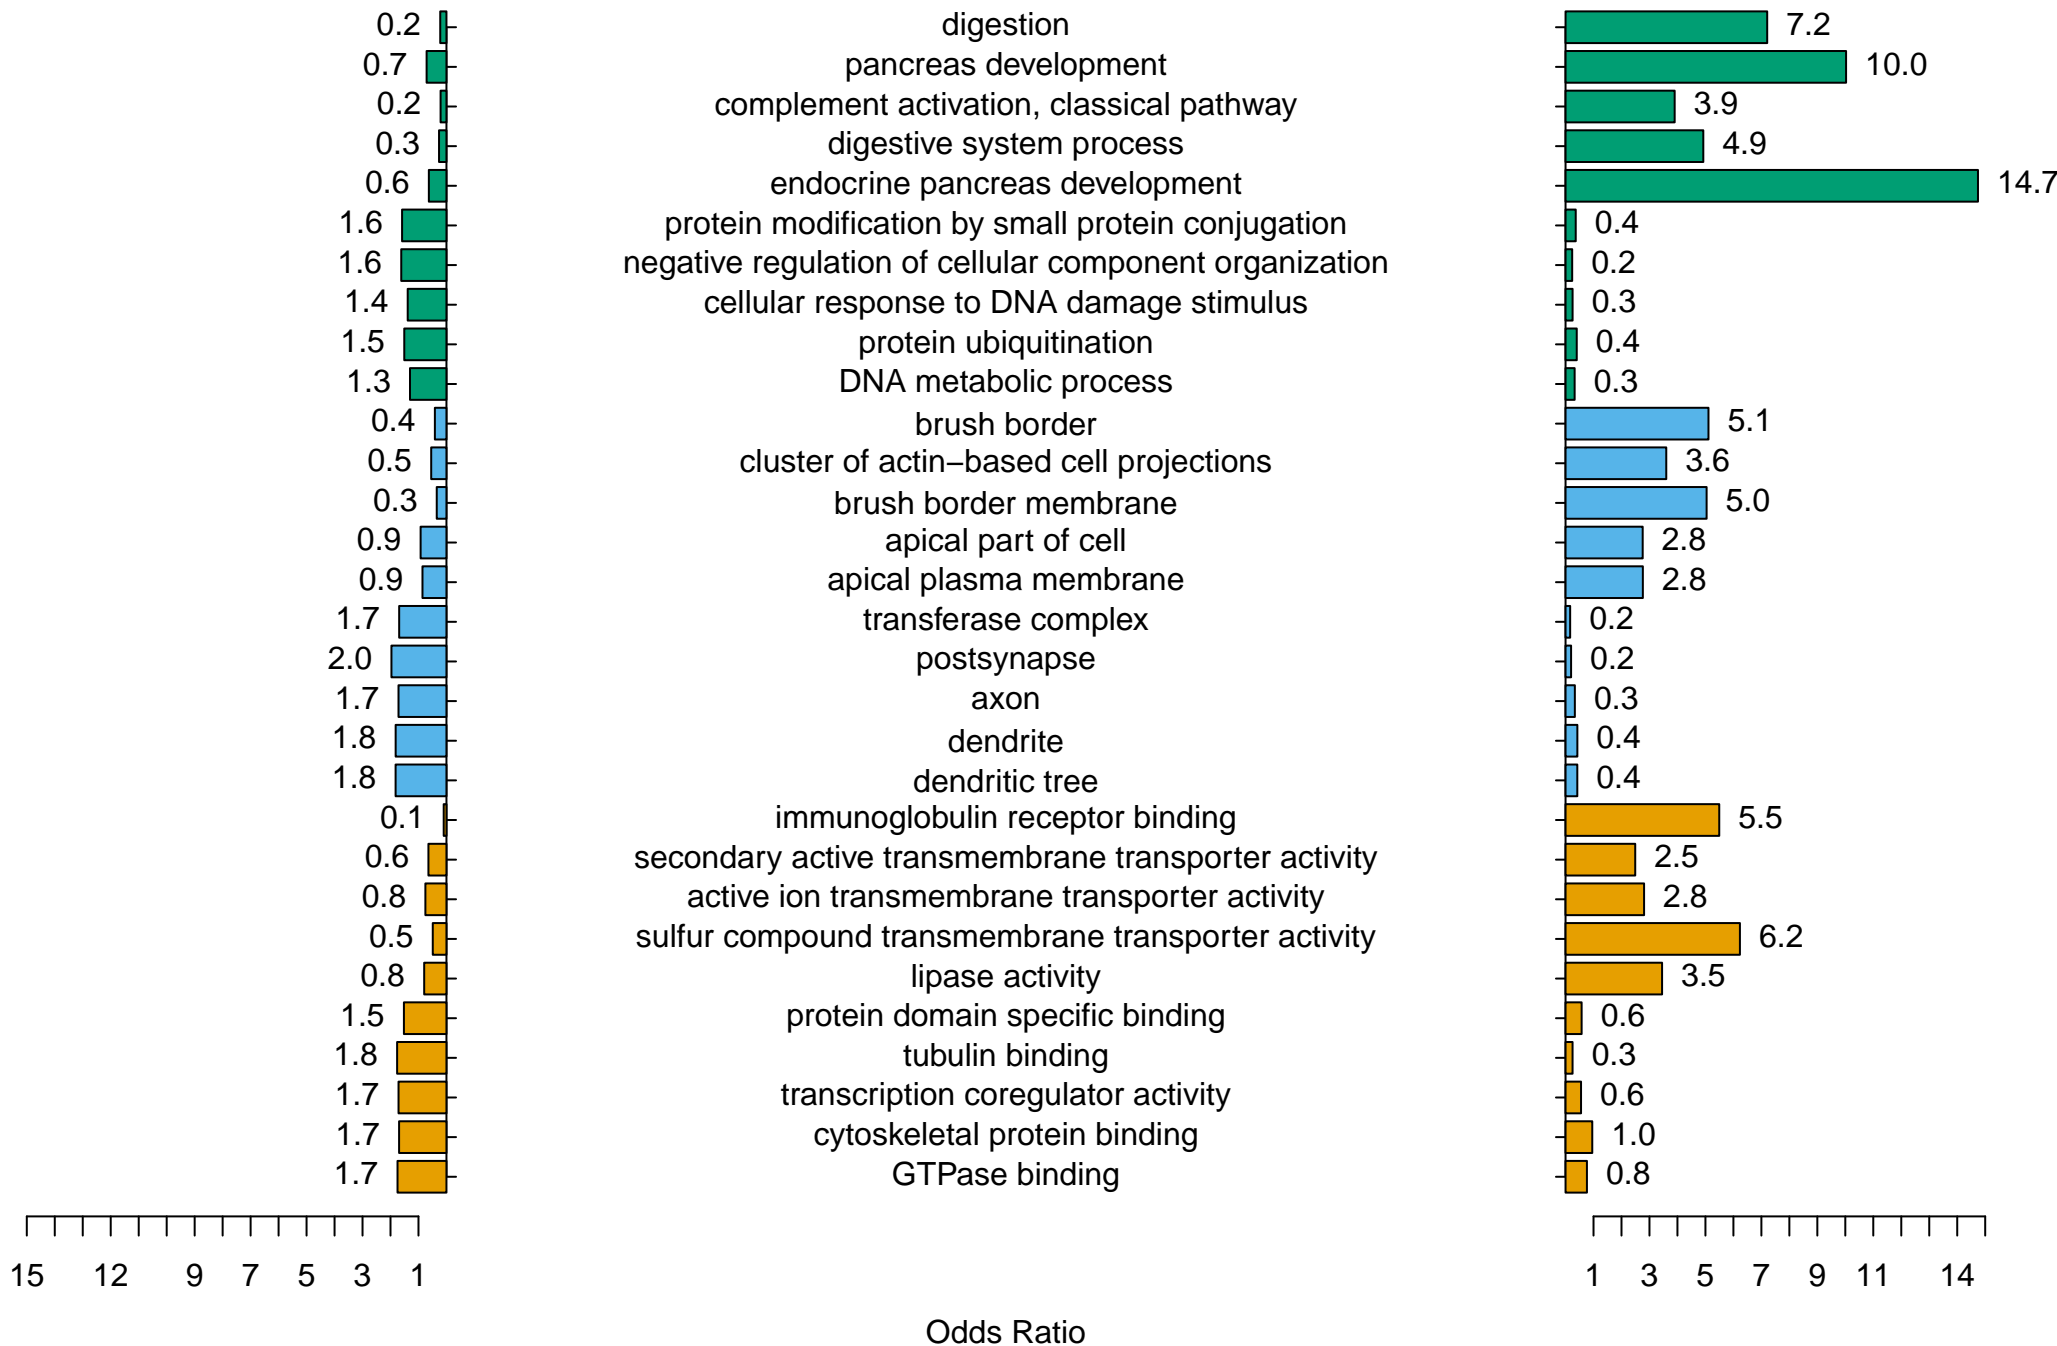

Gain in correlation with THAP9AS1    GO Term Name TCGA-THCA    Loss in correlation with THAP9AS1

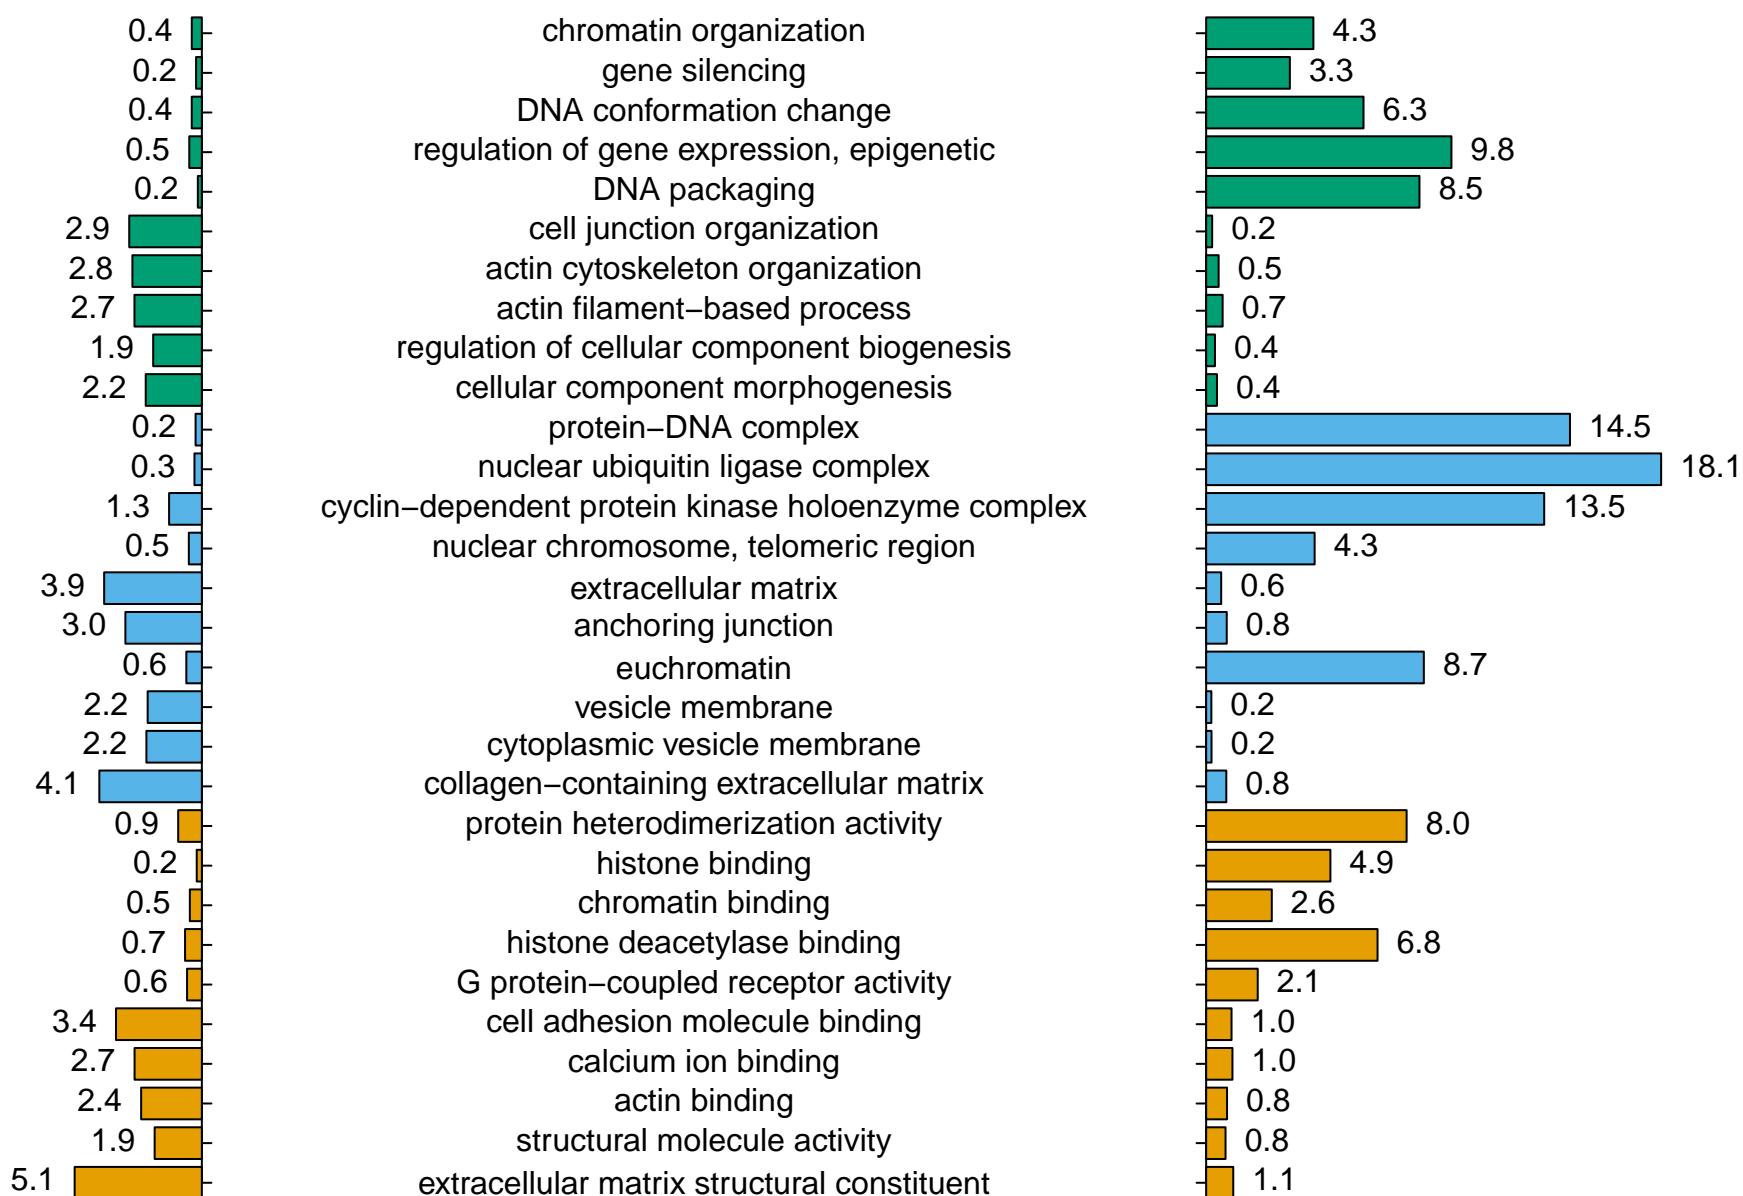

19 16 13 10 7 5 3 1

1 3 5 7 9 12 15 18

Odds Ratio

Gain in correlation with THAP9AS1    GO Term Name TCGA-UCEC    Loss in correlation with THAP9AS1

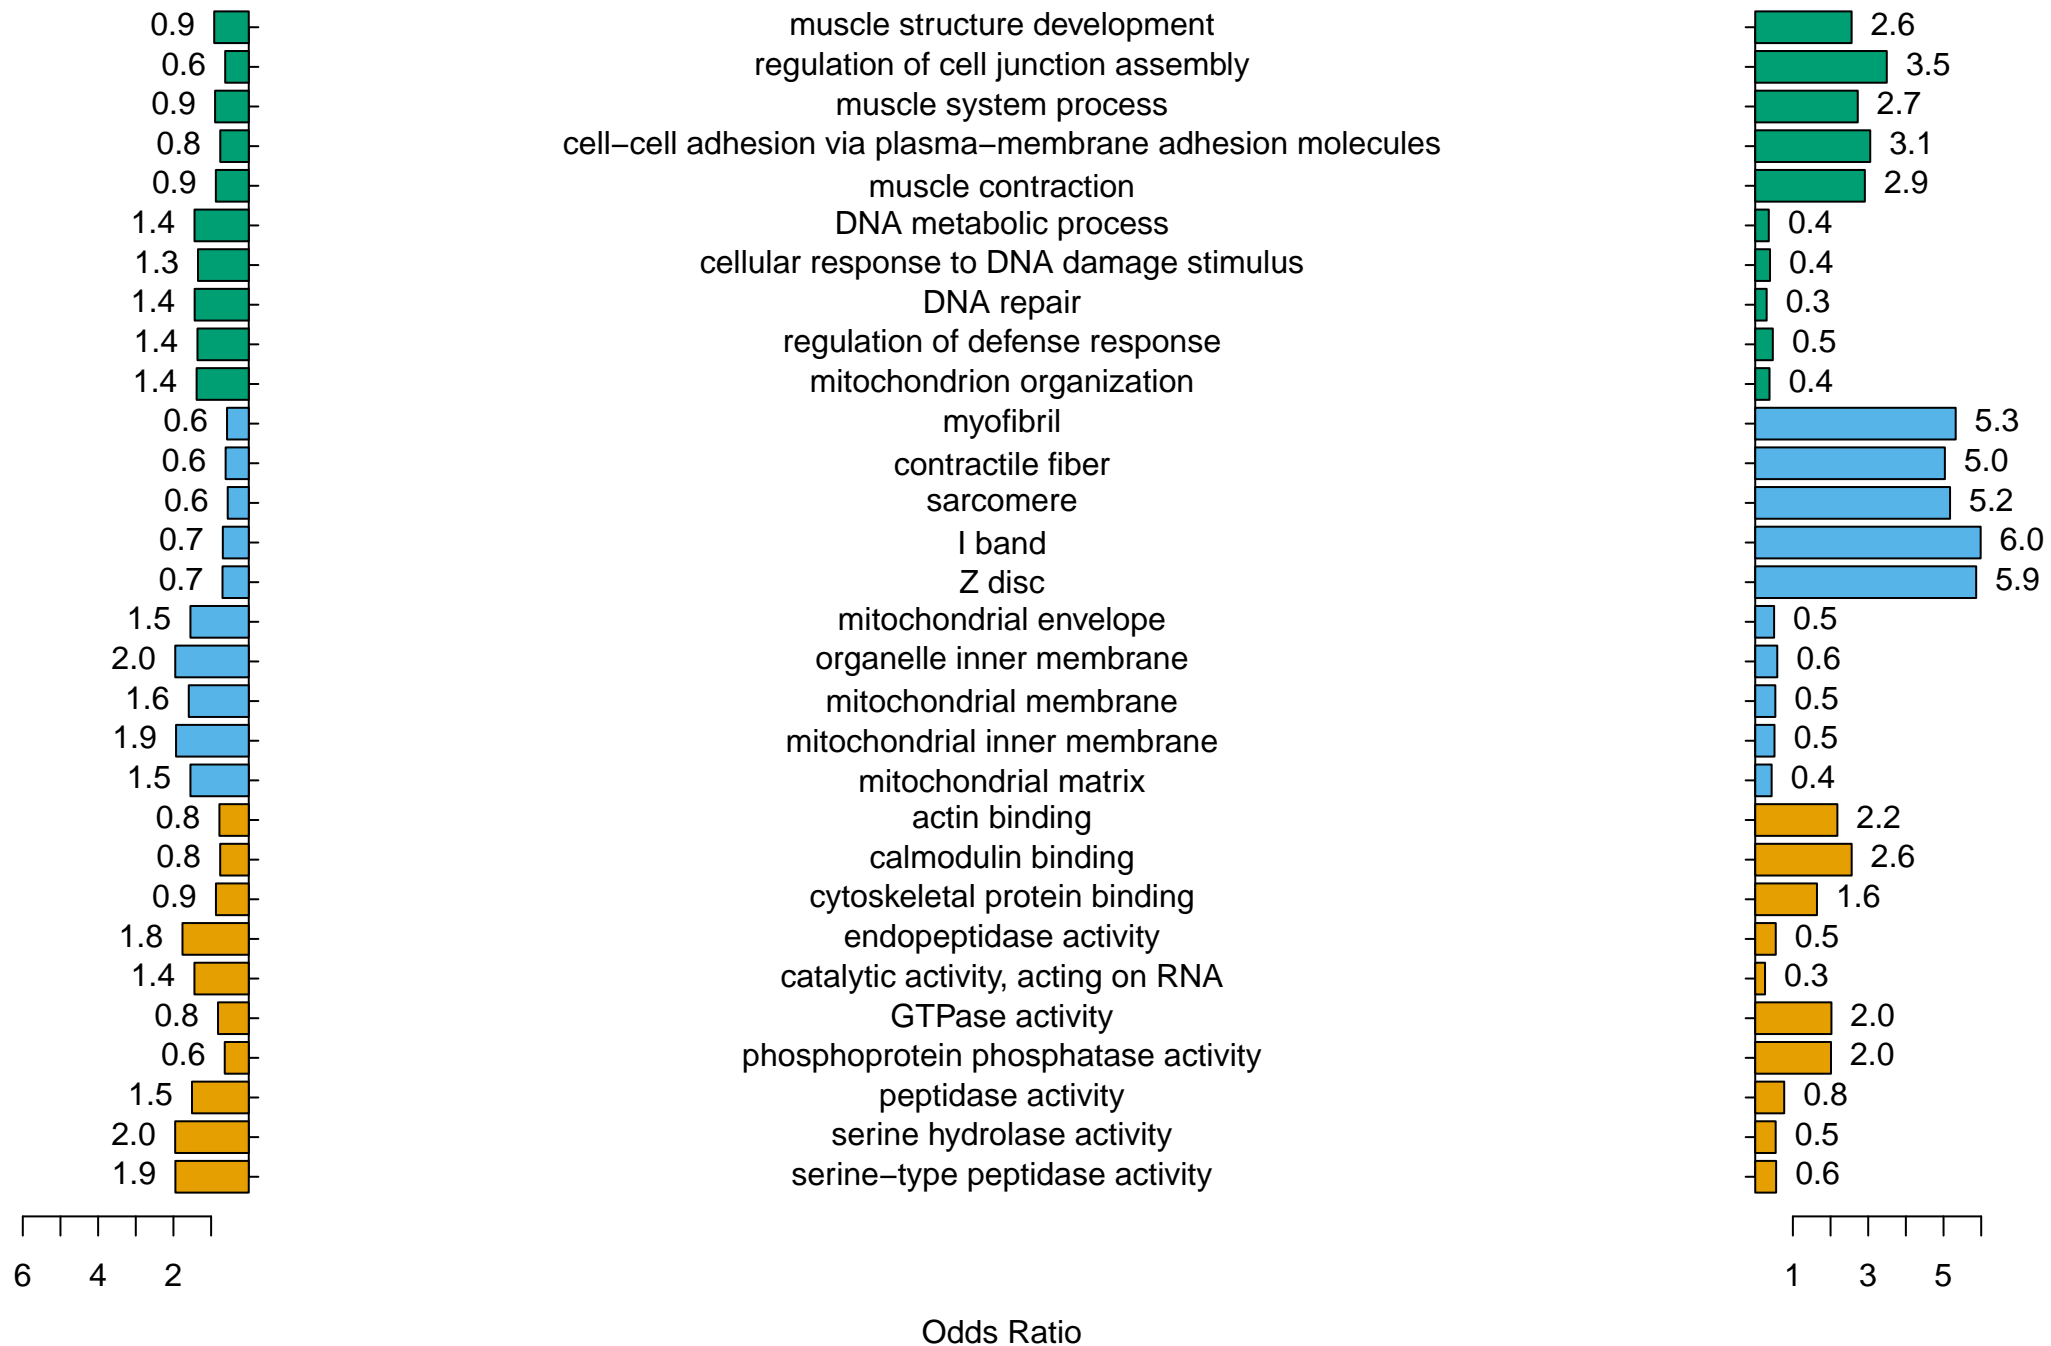

Supplement: s1 [file s1]
