# Supplementary material
Source: MDPI journal article supplement (https://www.mdpi.com/2311-553X/8/4/51)
Supplement: s1 [file s1]

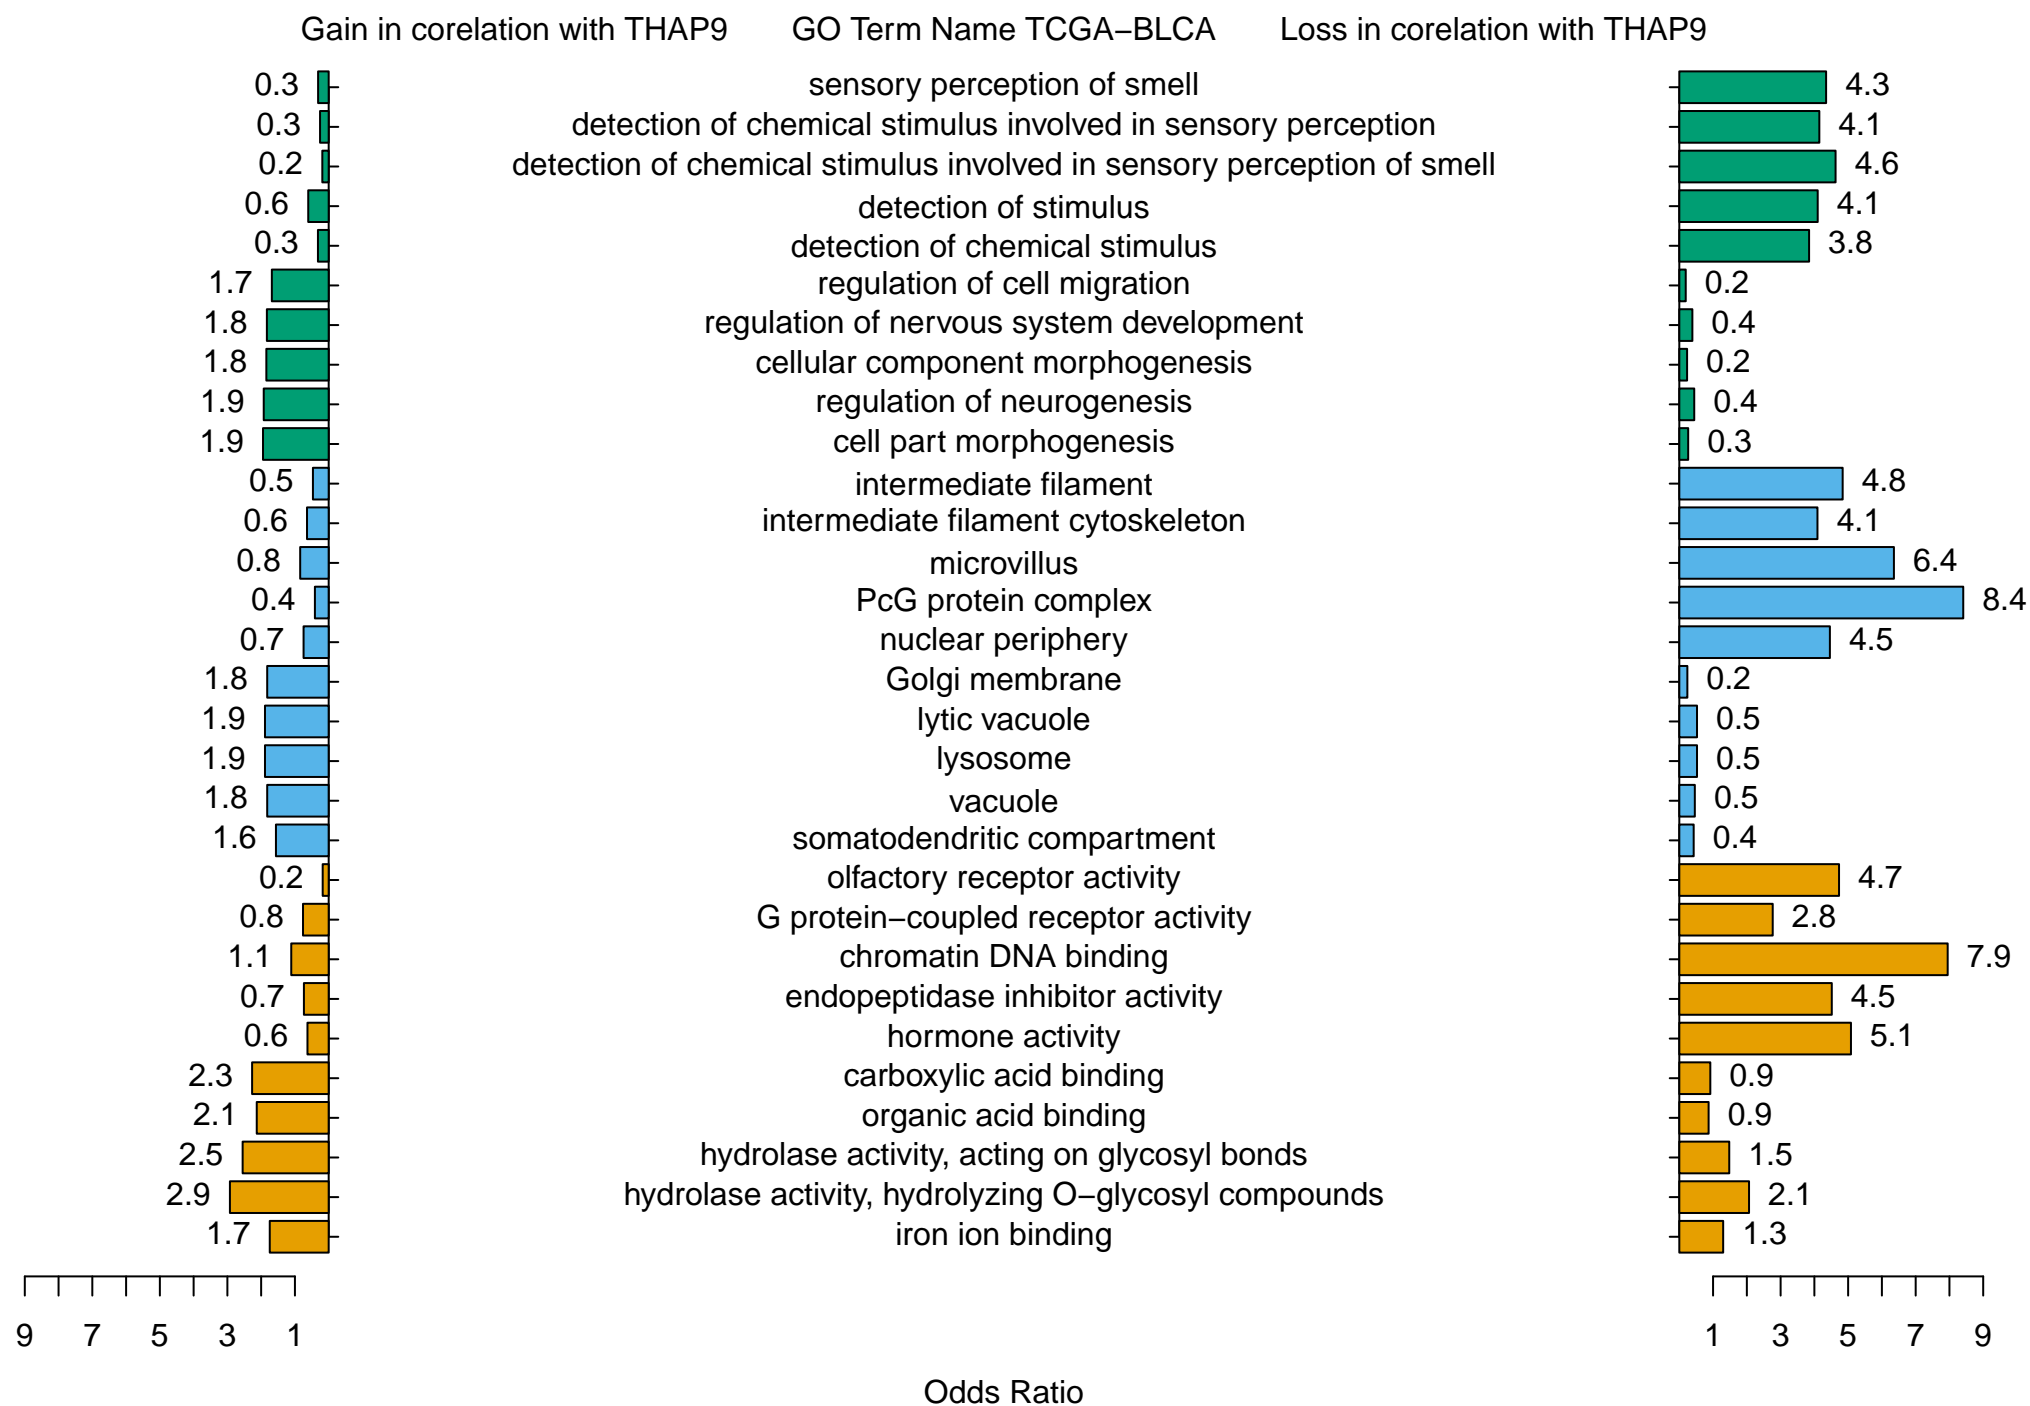

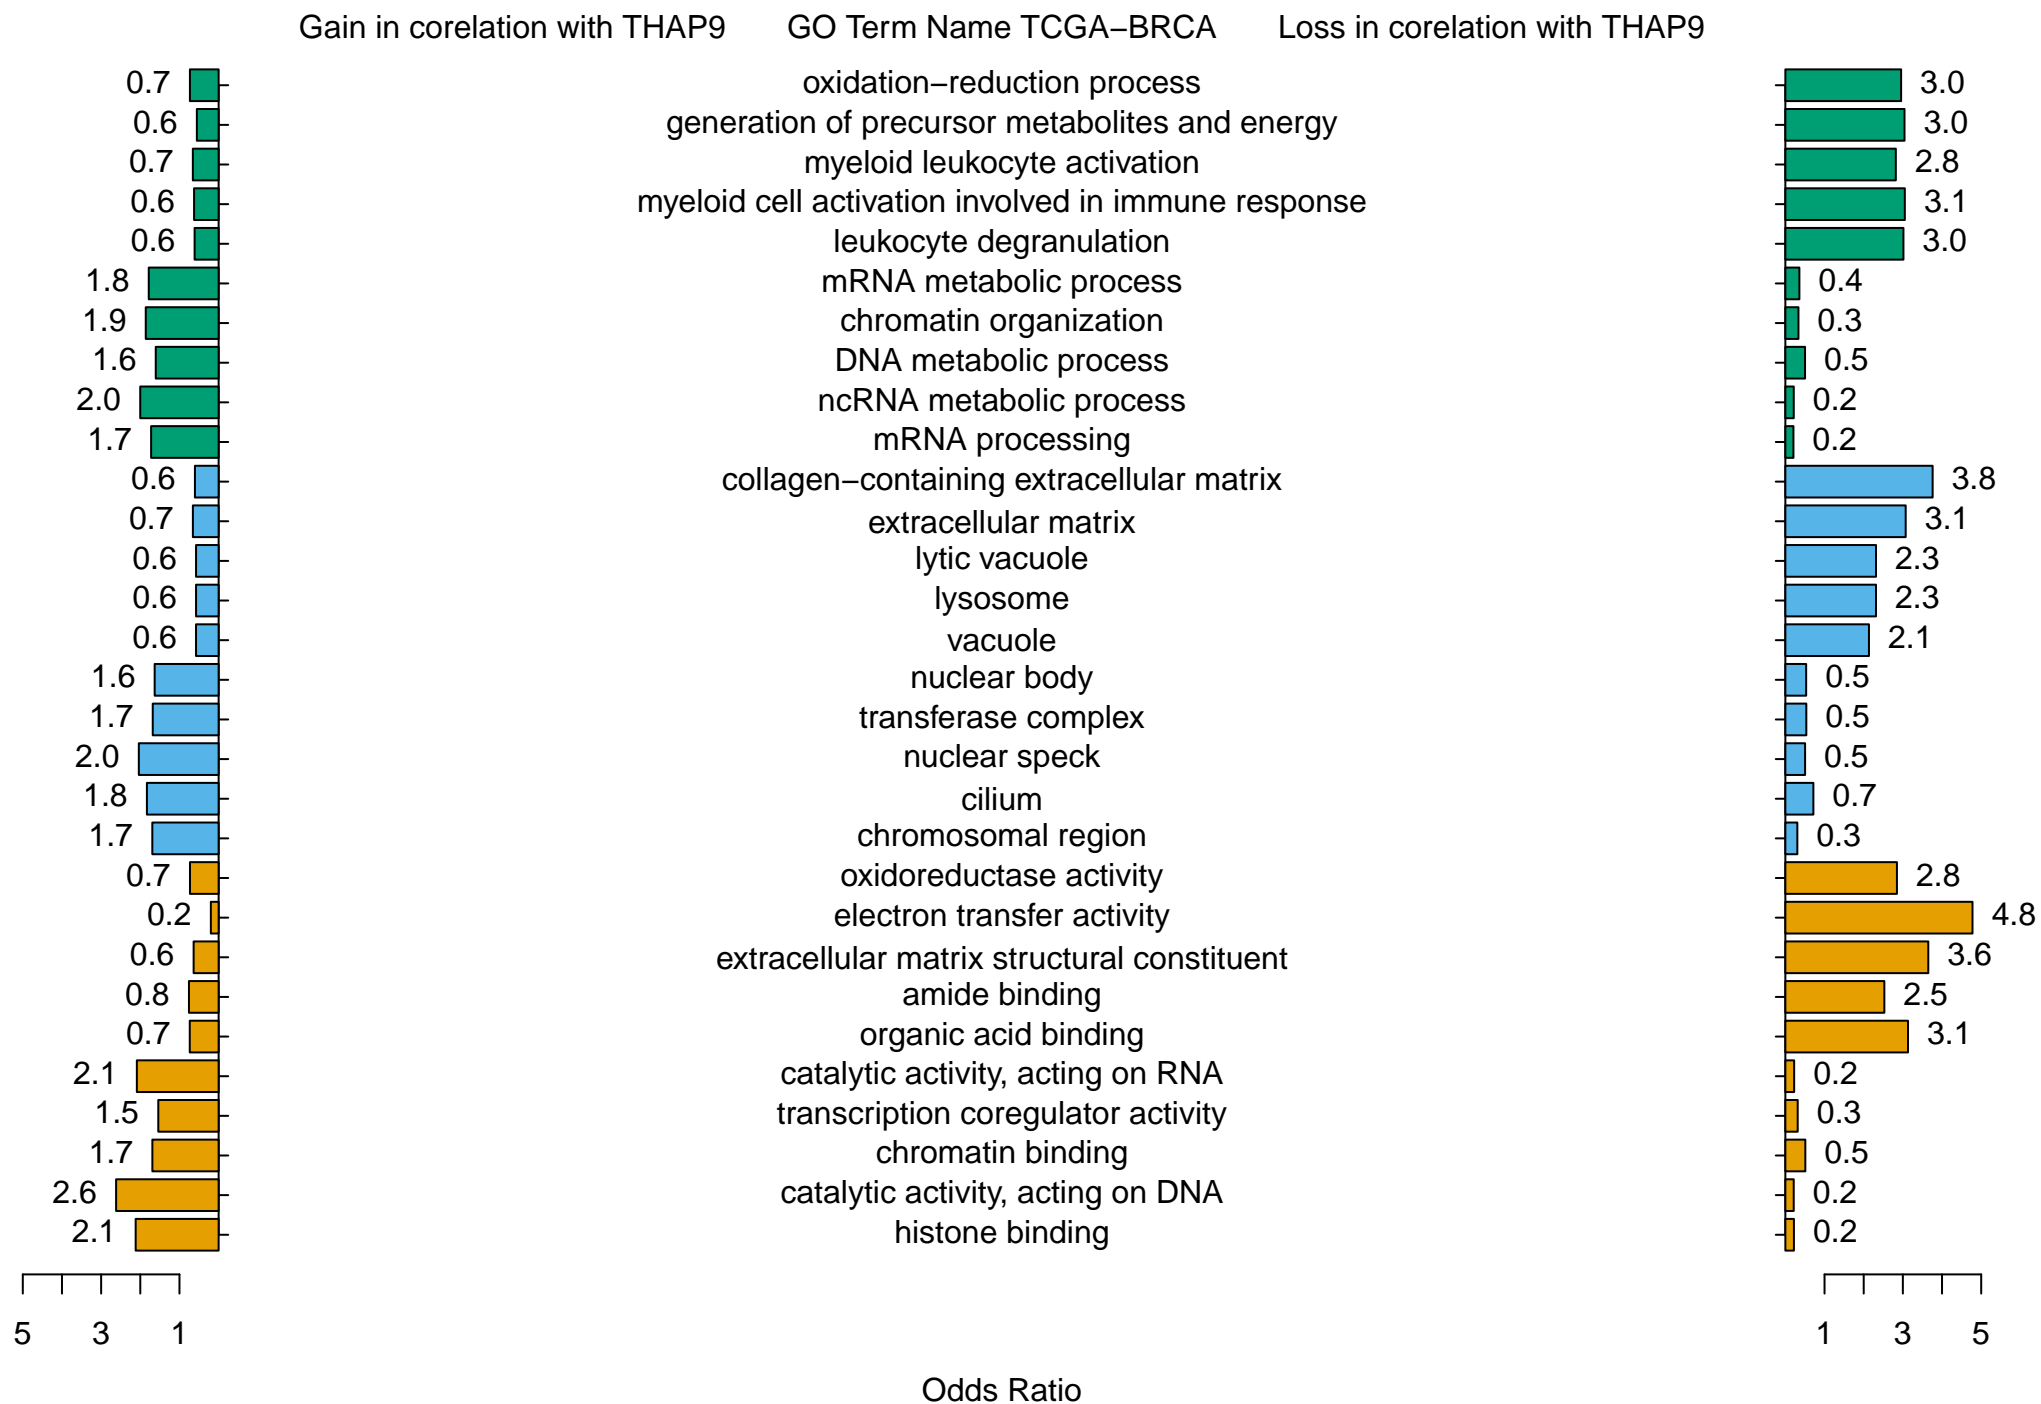

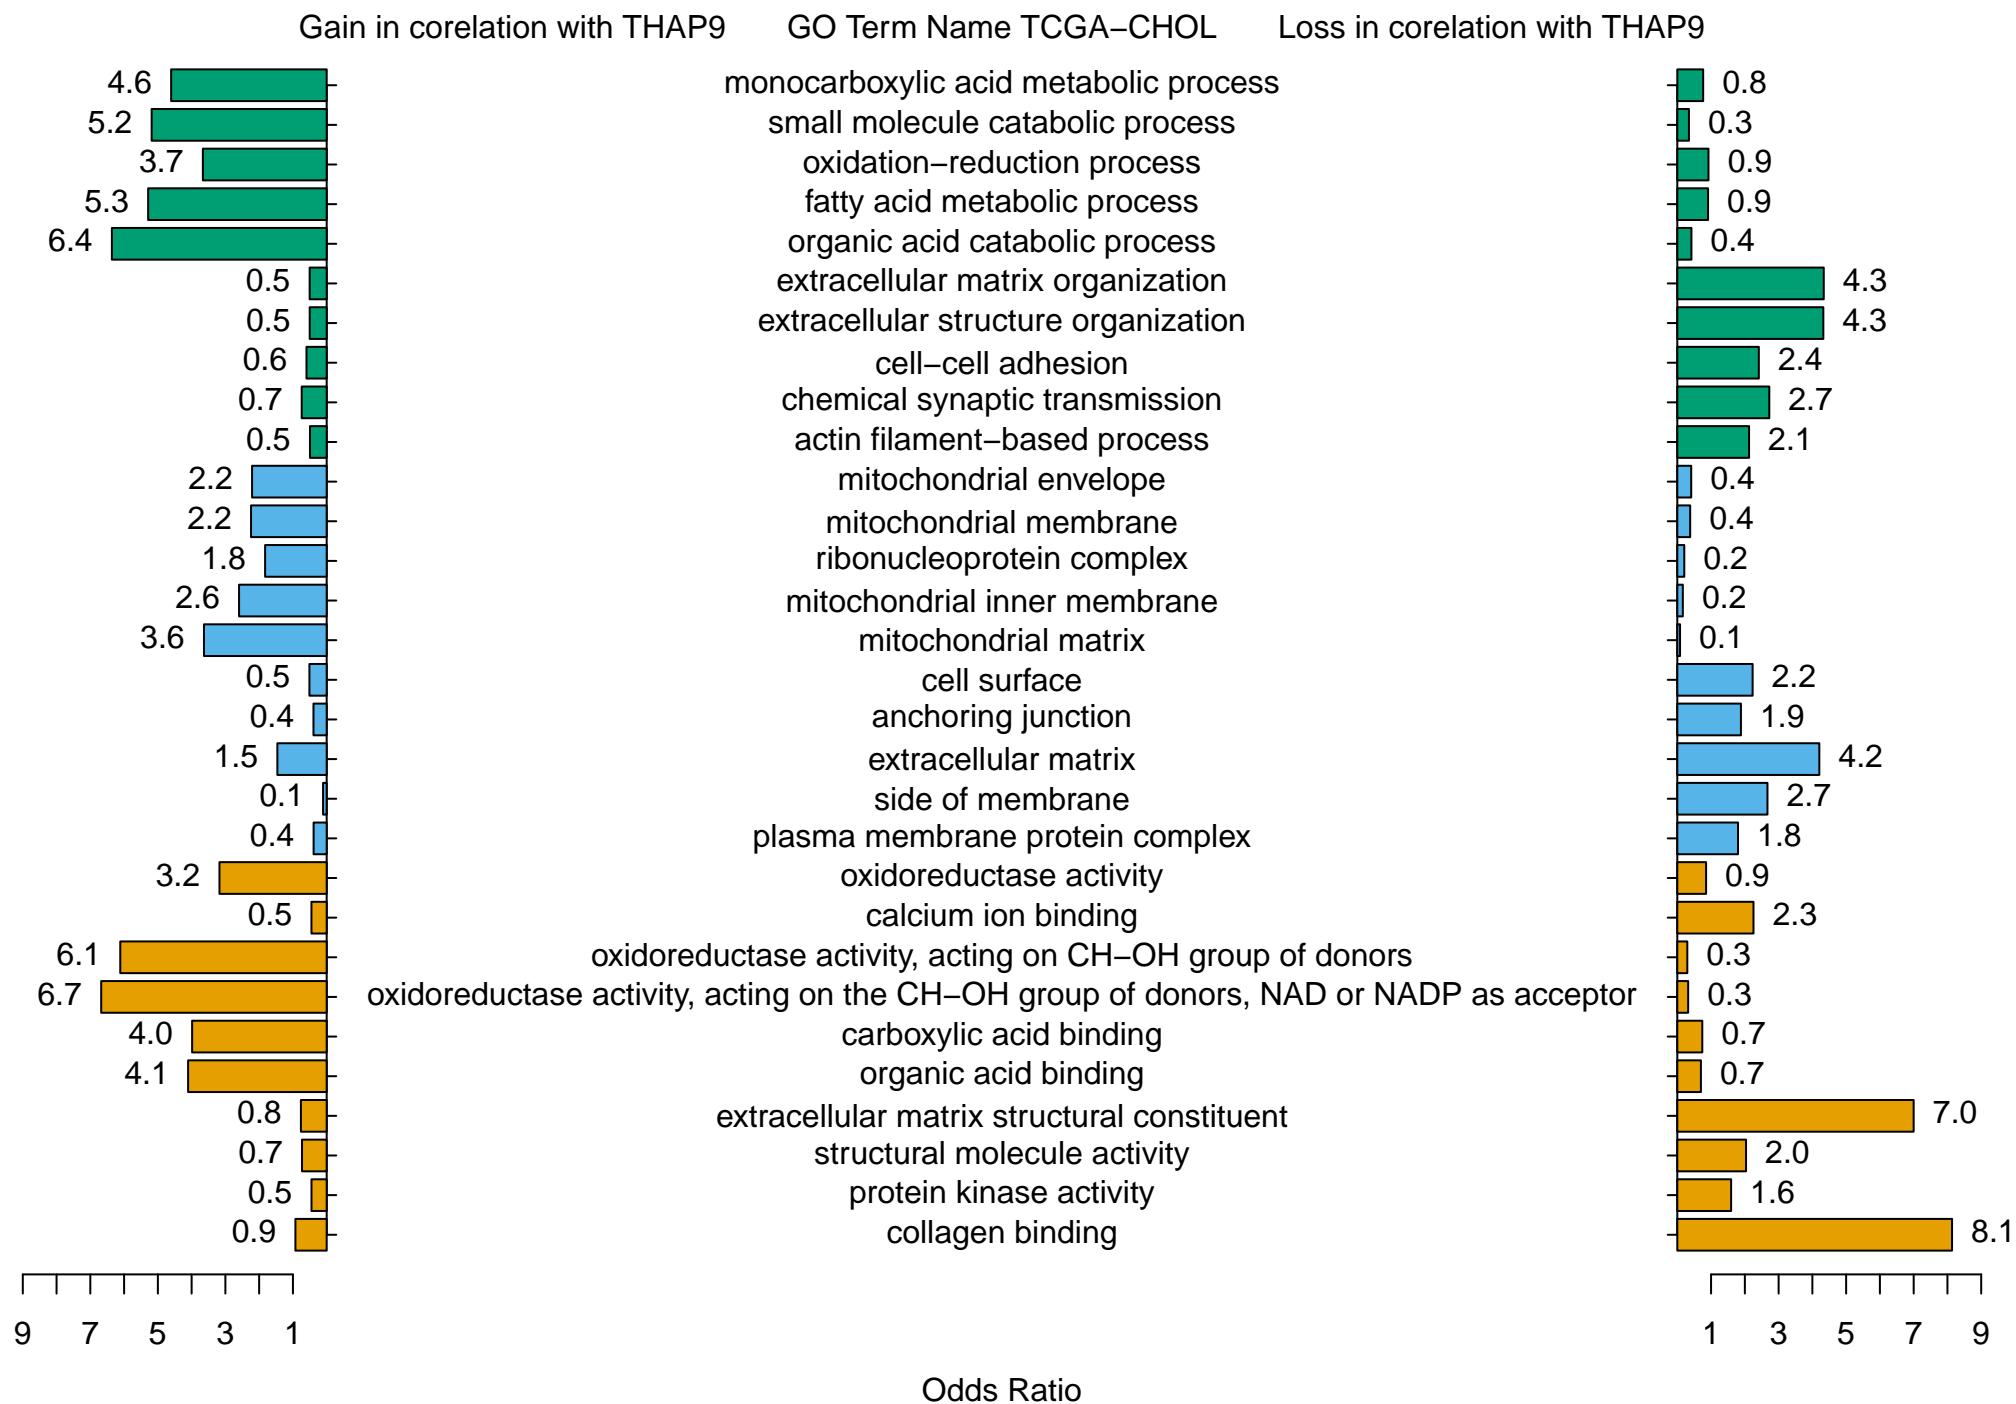

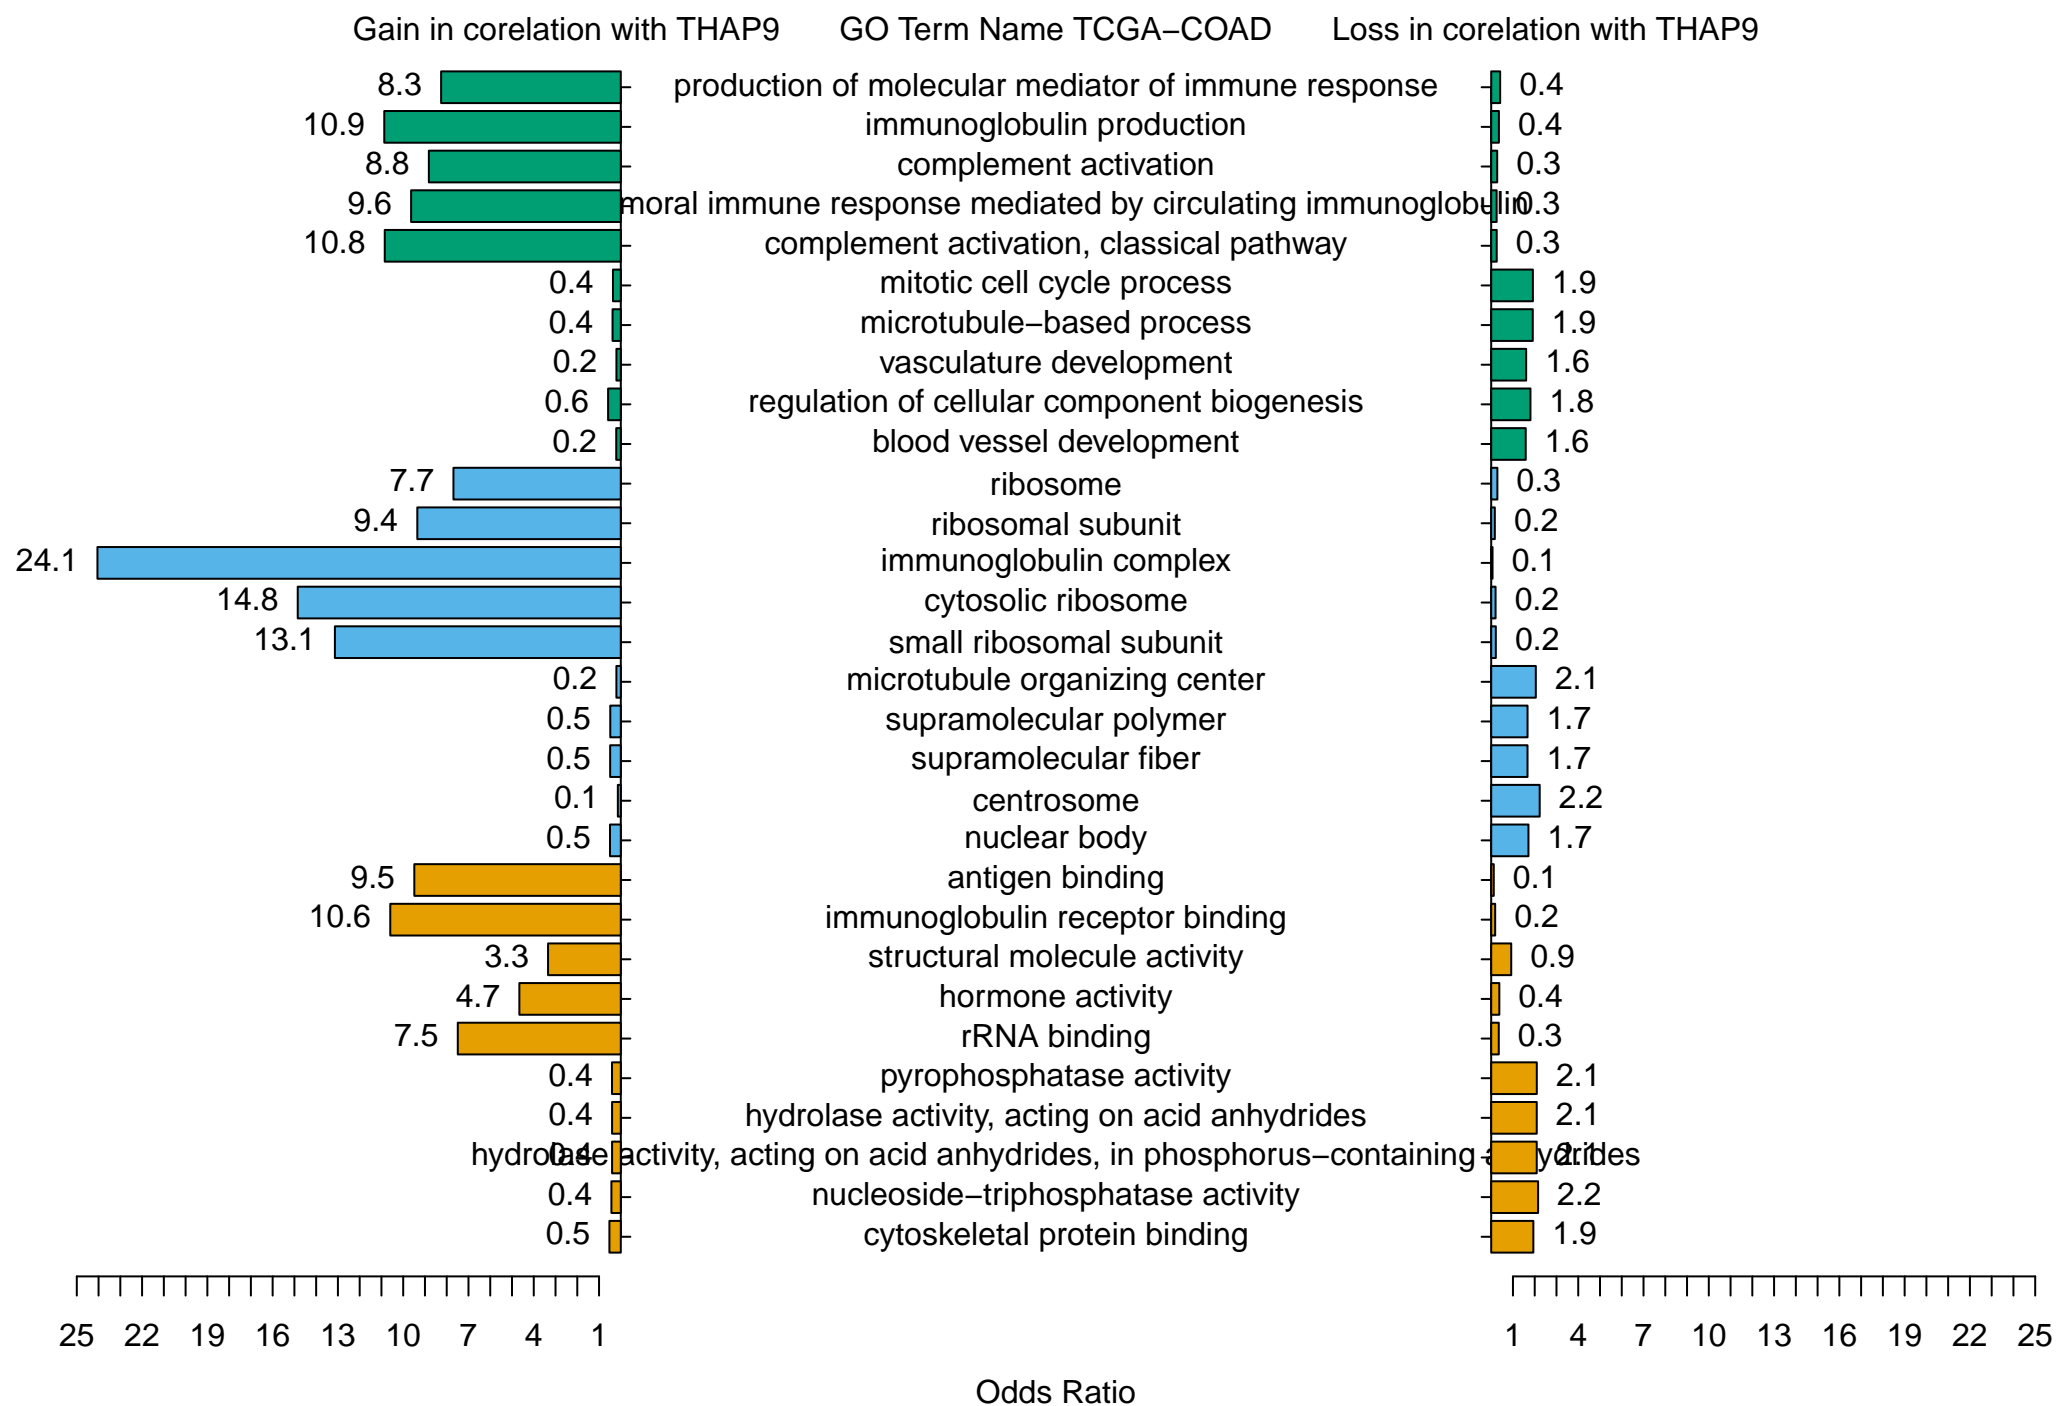

Gain in correlation with THAP9

GO Term Name TCGA-ESCA

Loss in correlation with THAP9

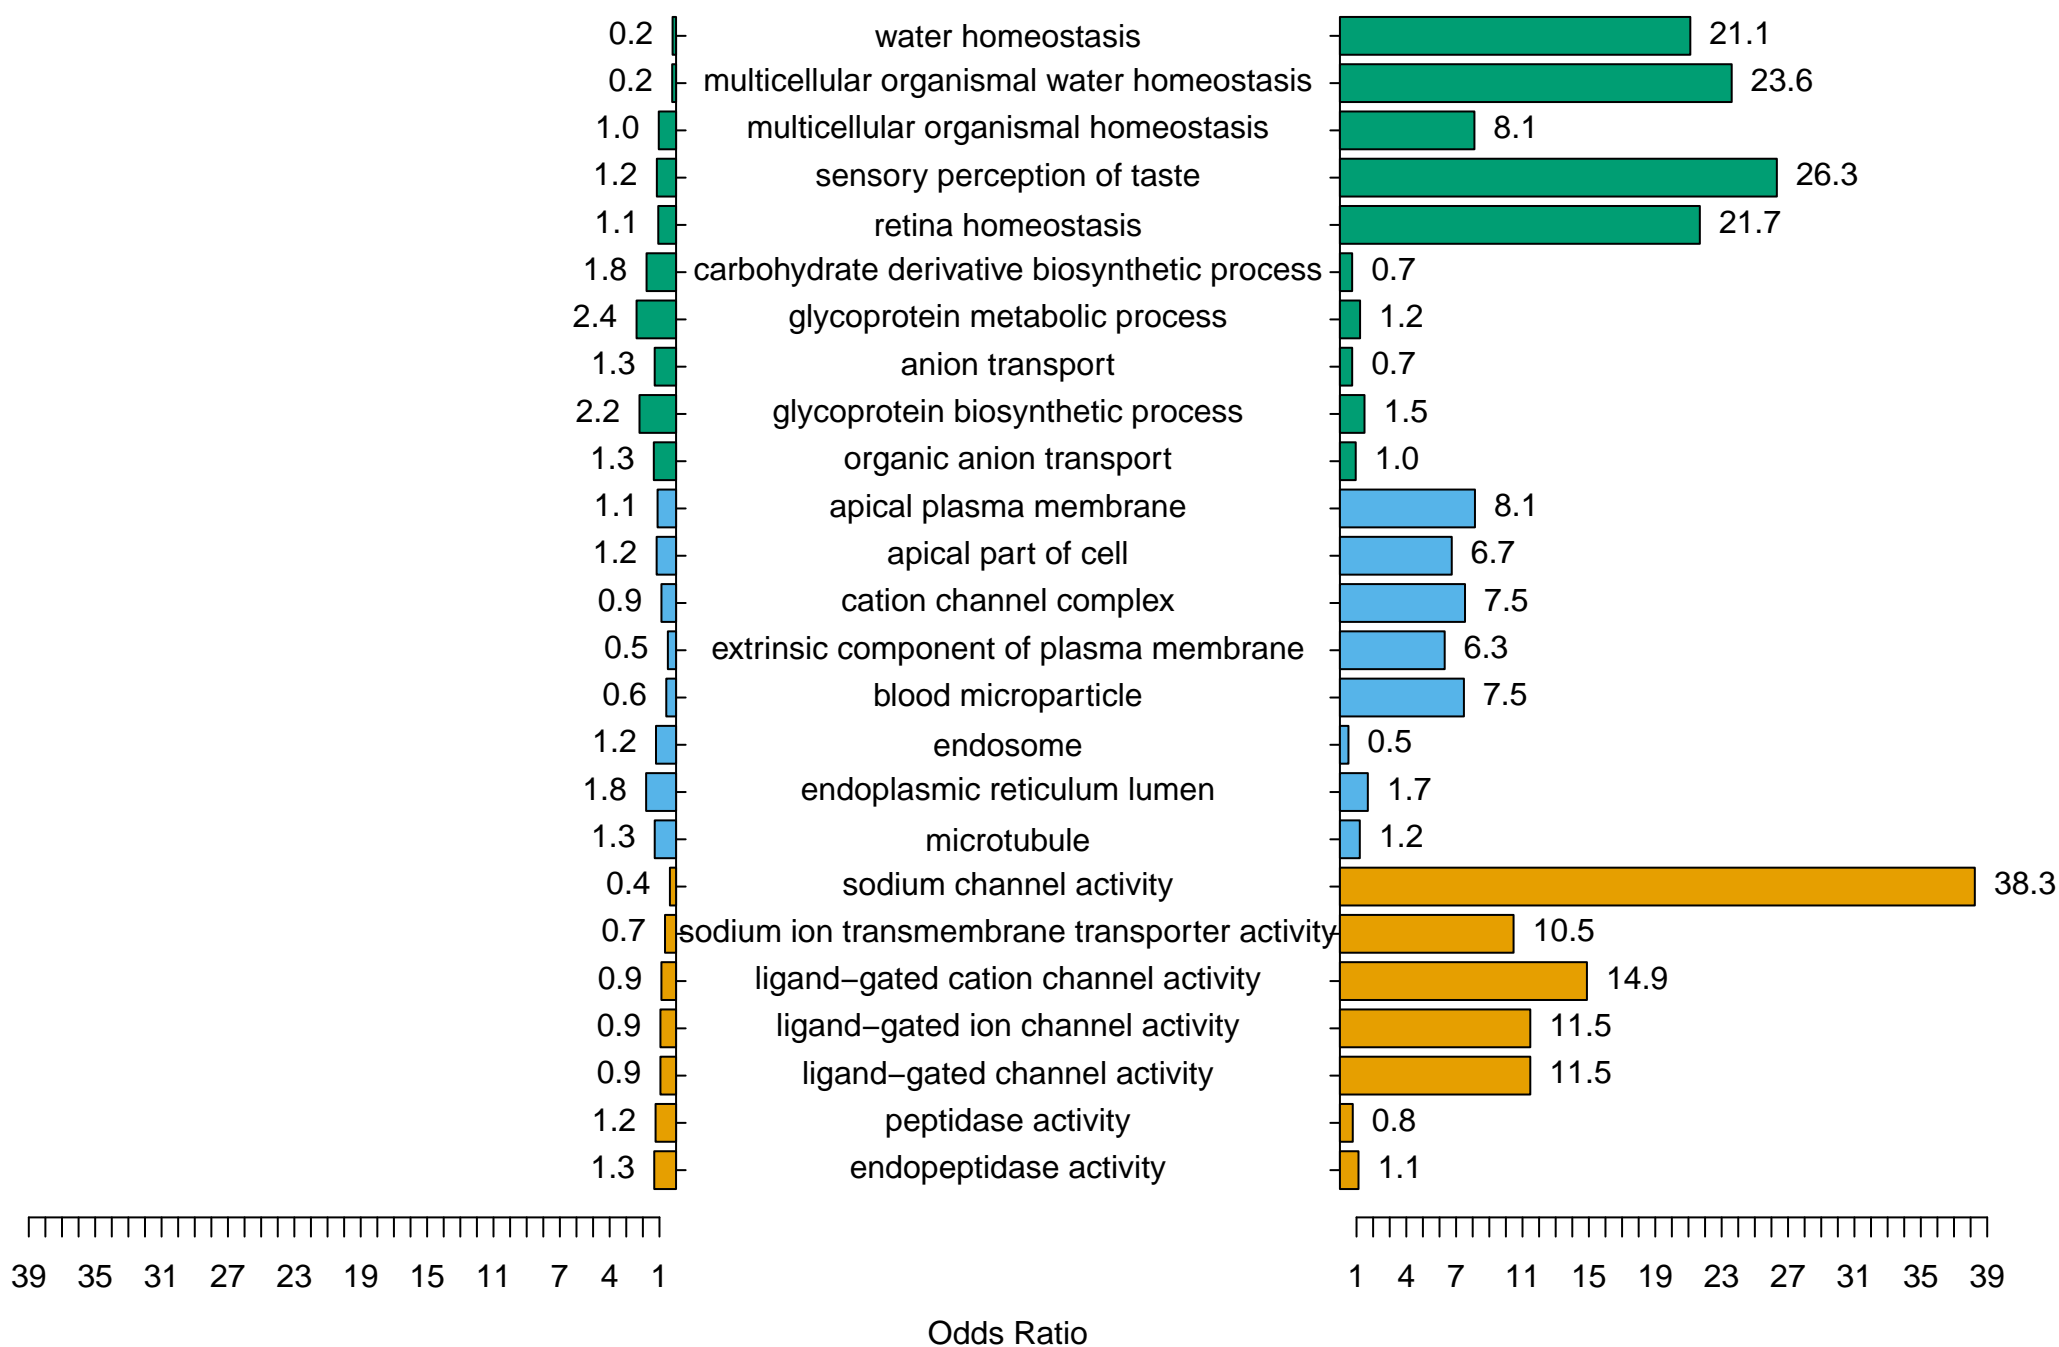

Gain in correlation with THAP9

GO Term Name TCGA-GBM

Loss in correlation with THAP9

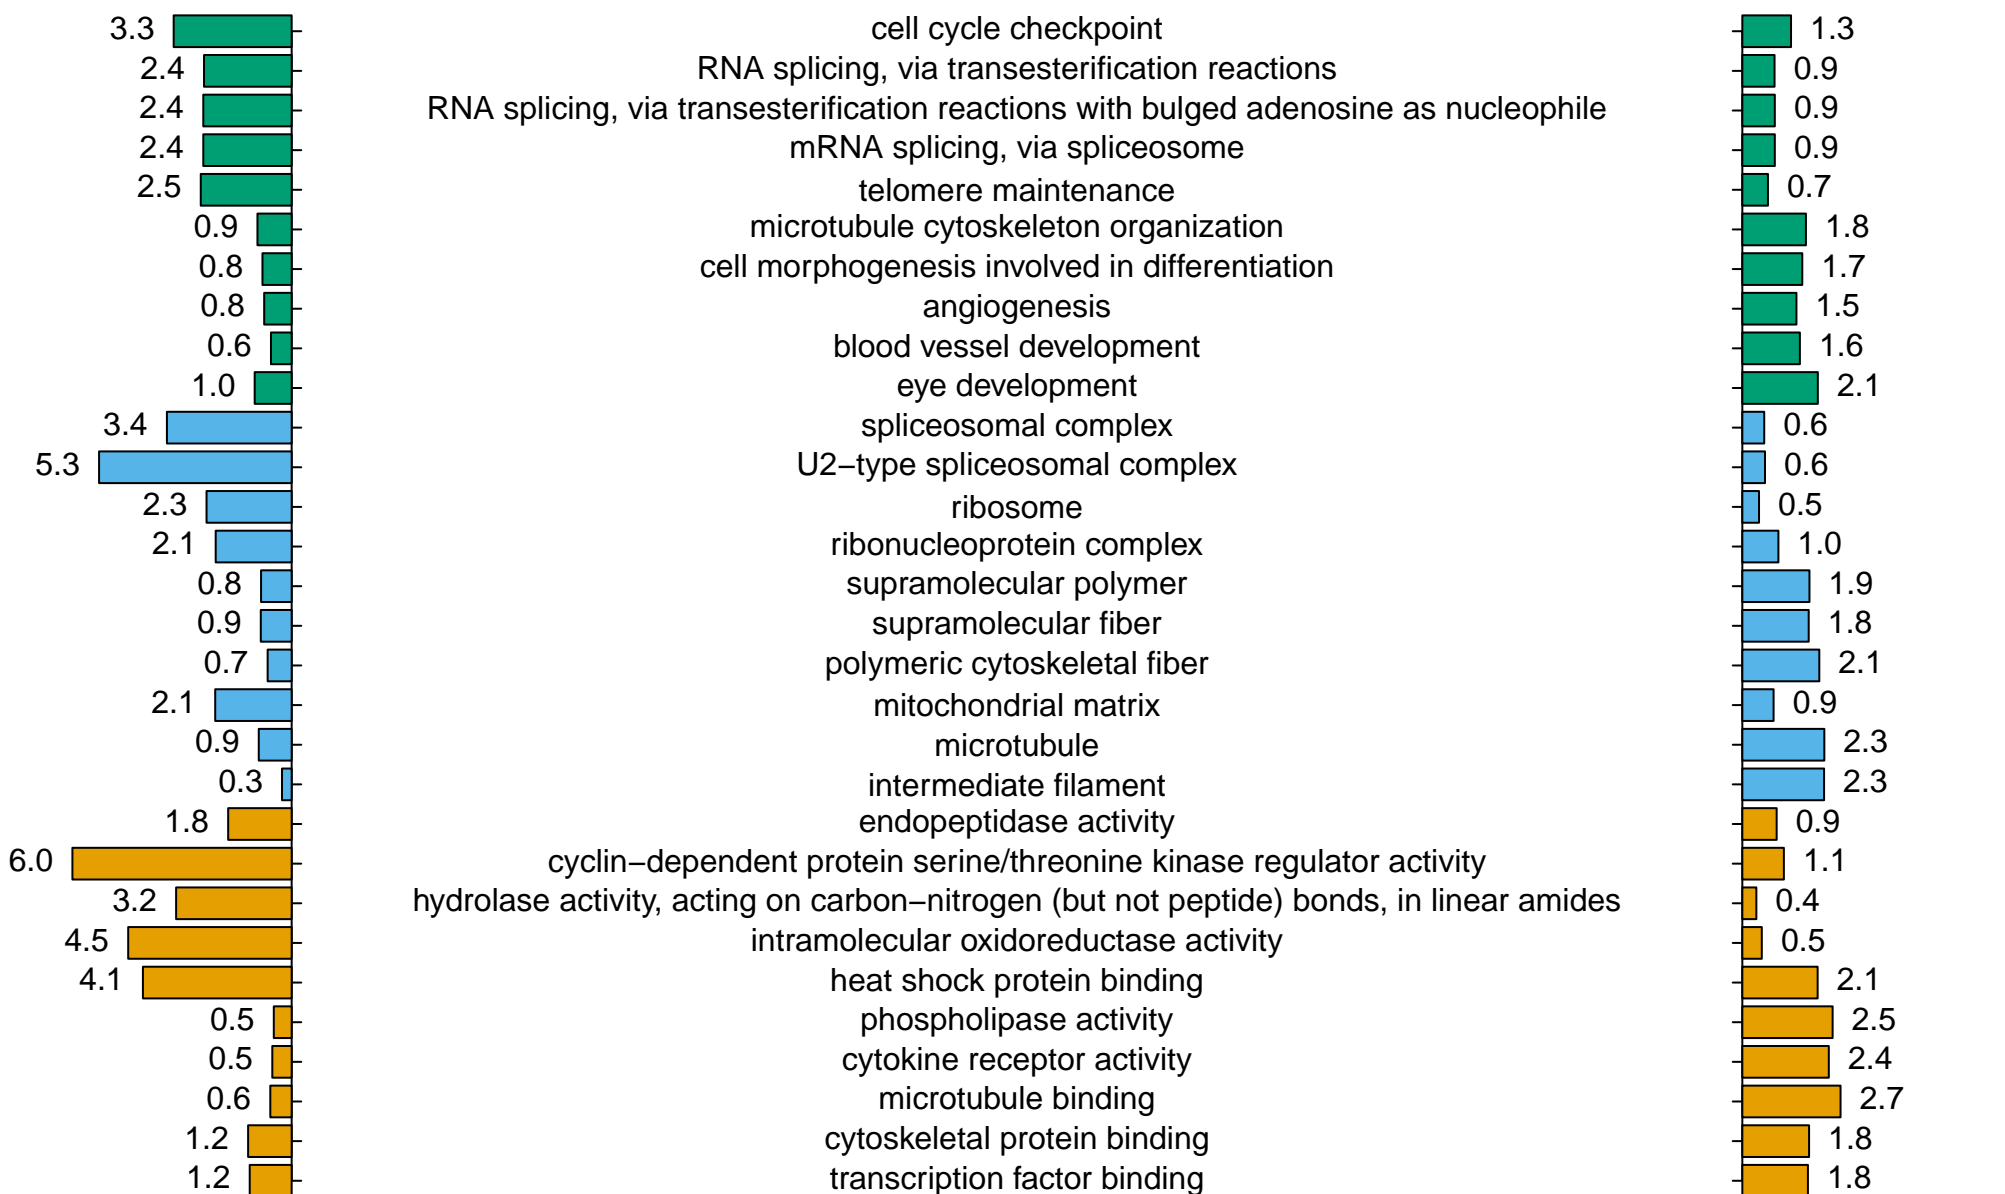

Odds Ratio

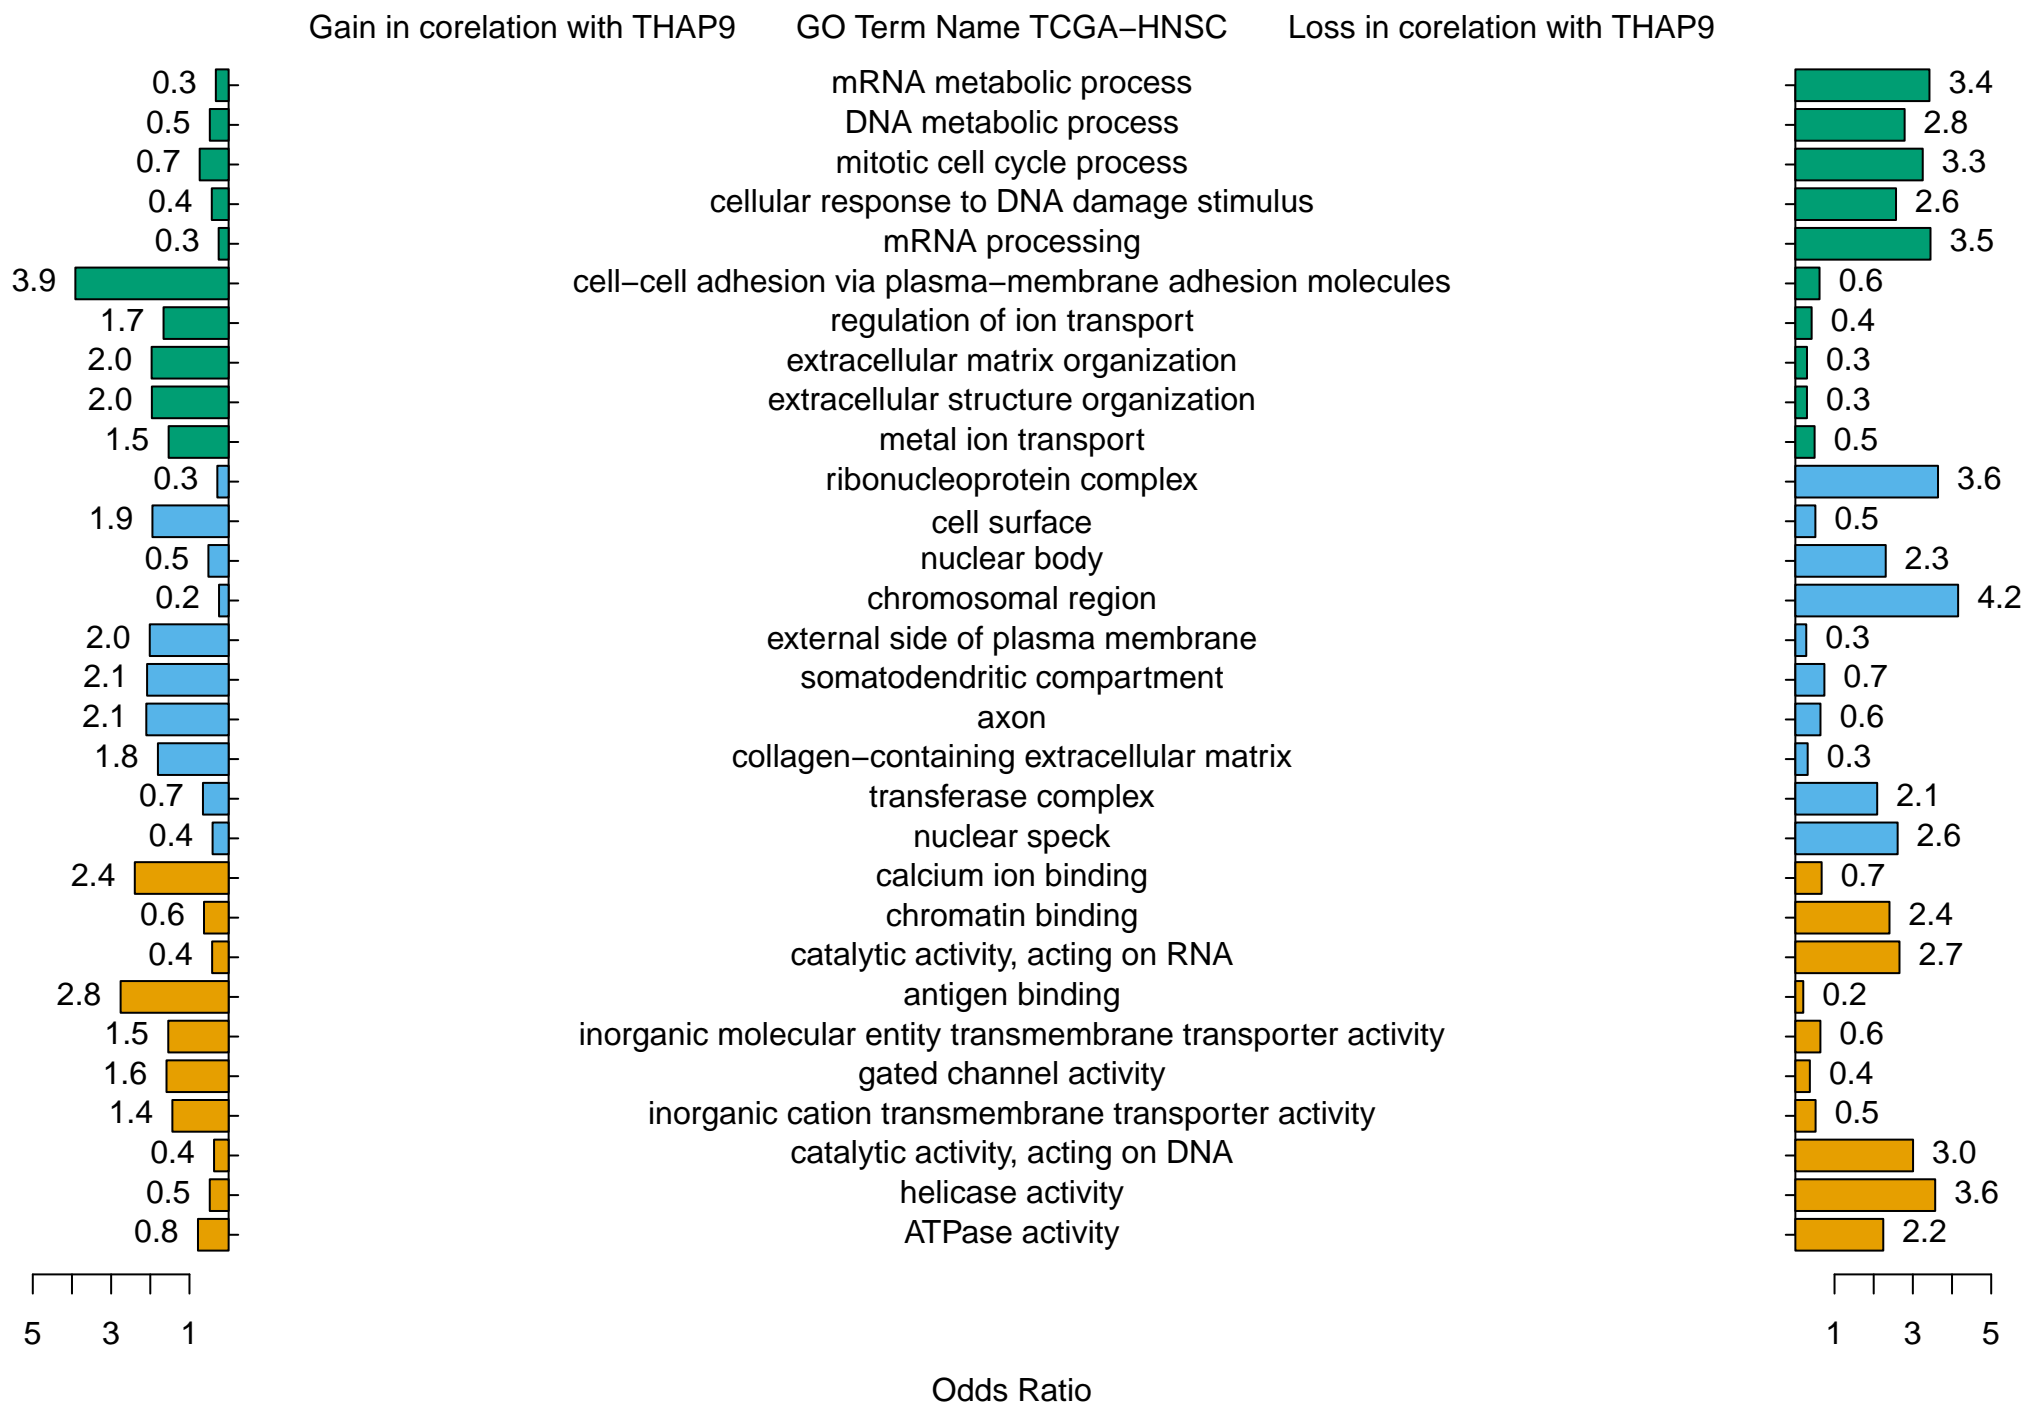

Gain in correlation with THAP9

GO Term Name TCGA-KICH

Loss in correlation with THAP9

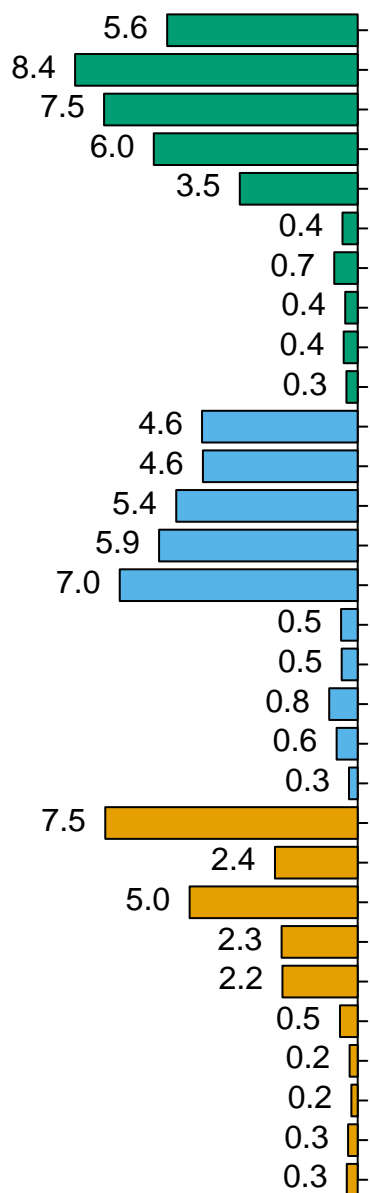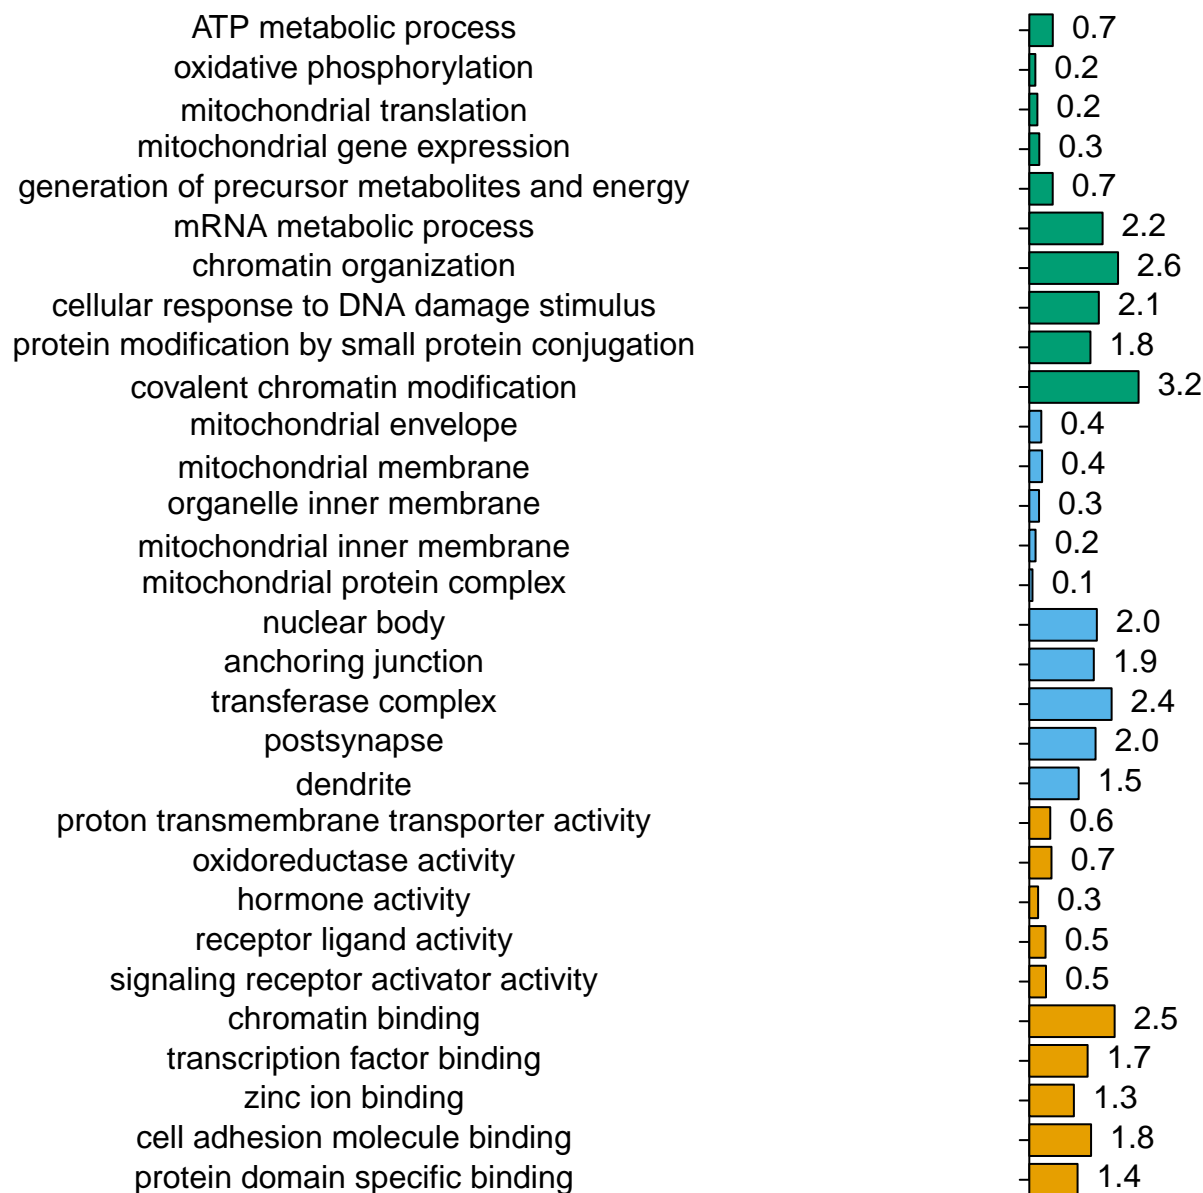

9 7 5 3 1

1 3 5 7 9

Odds Ratio



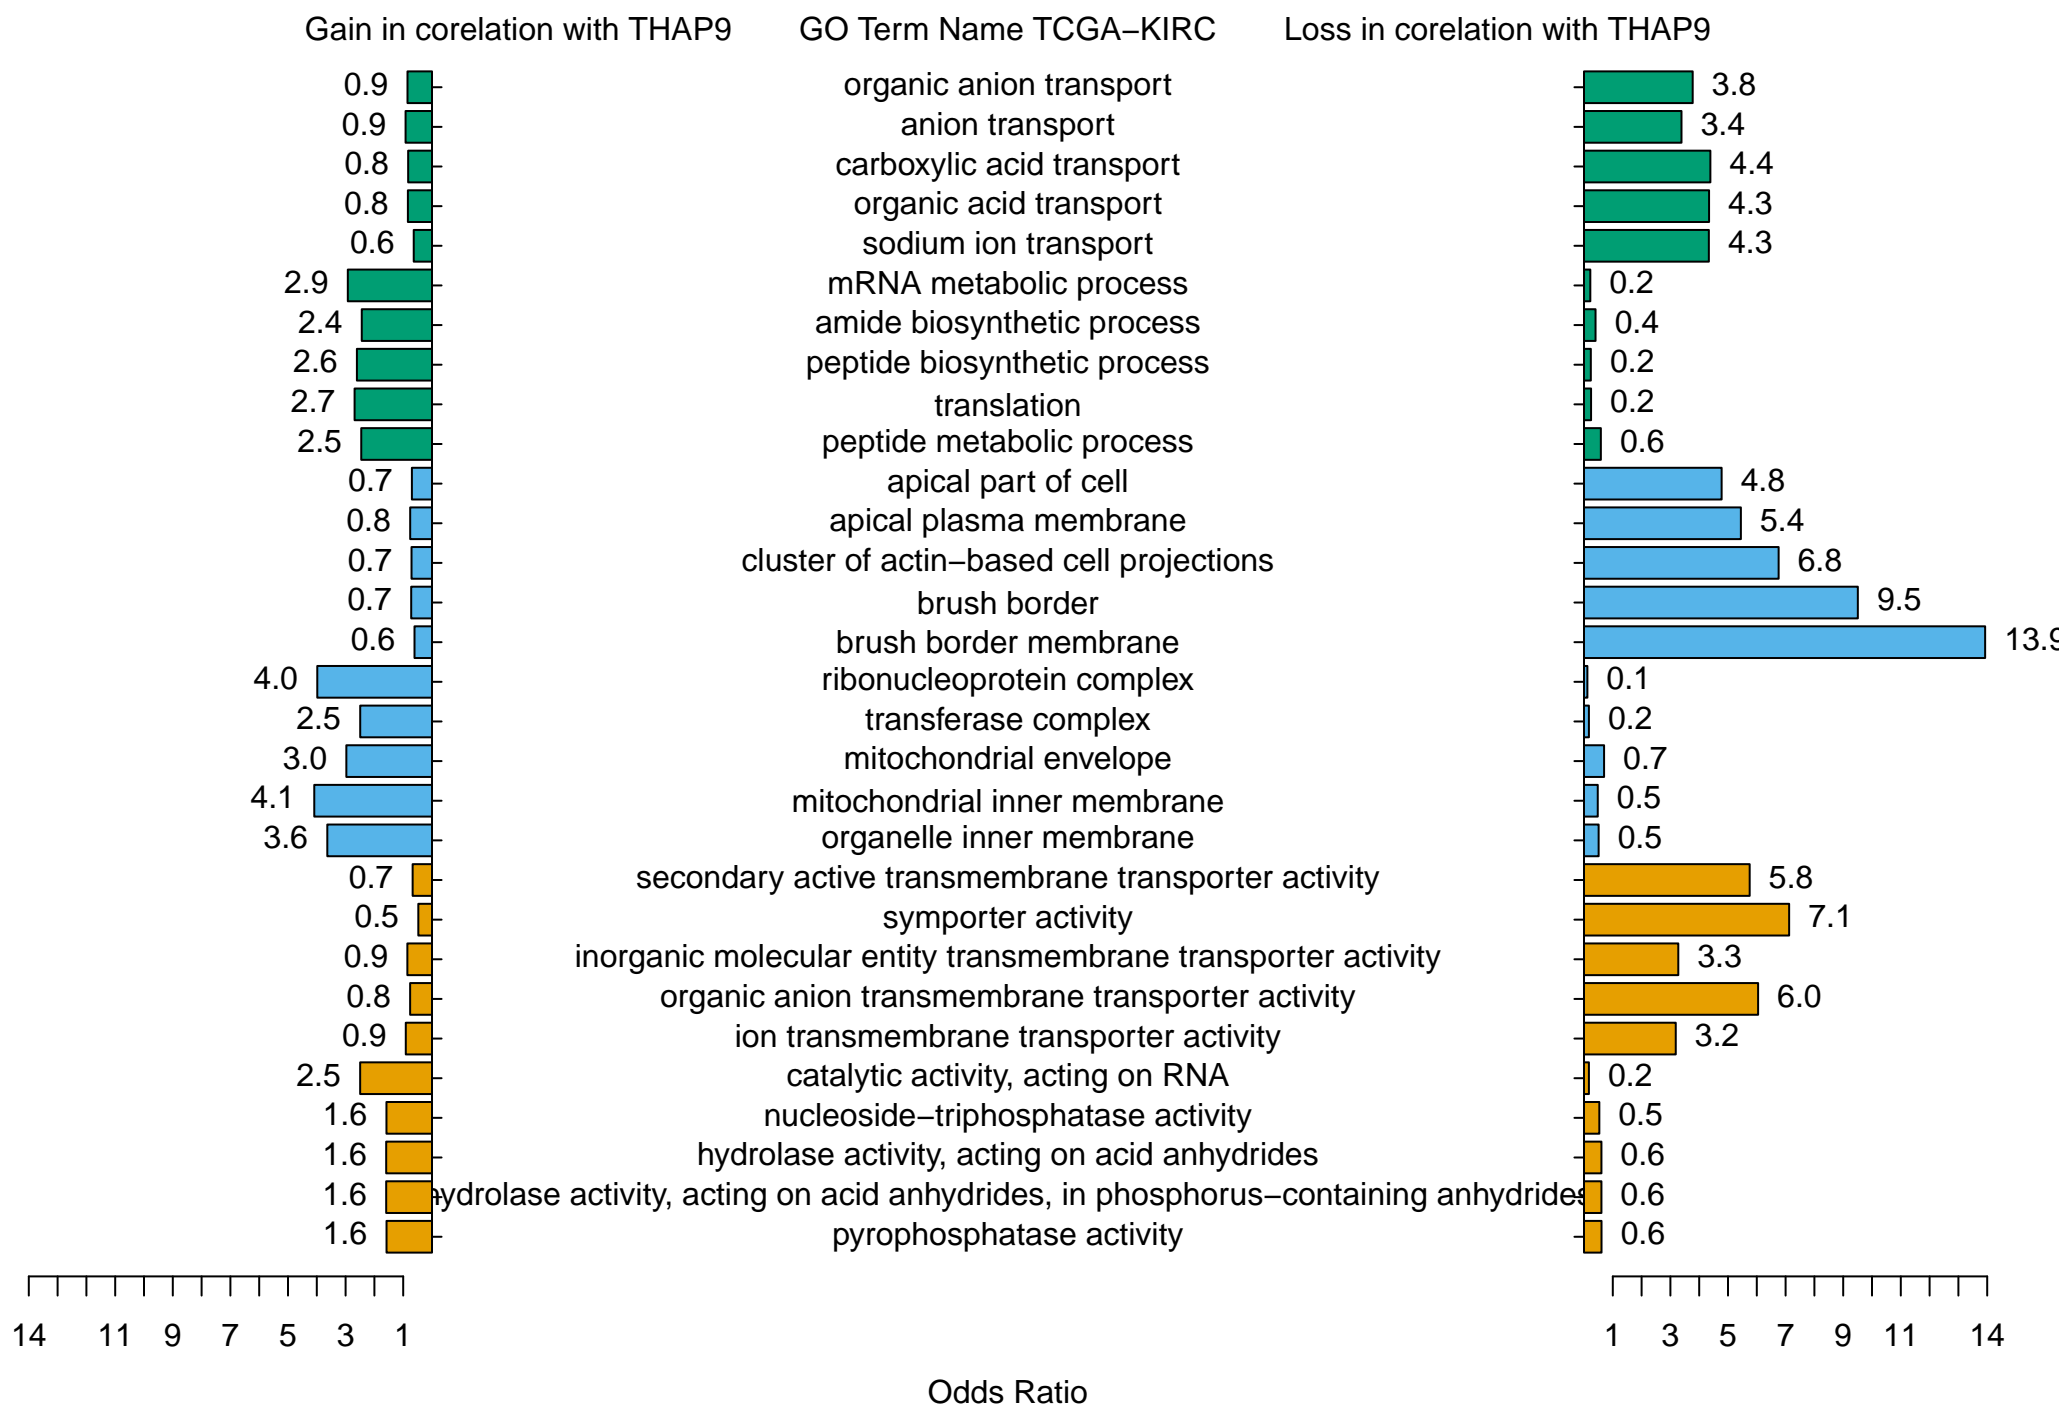

Gain in correlation with THAP9

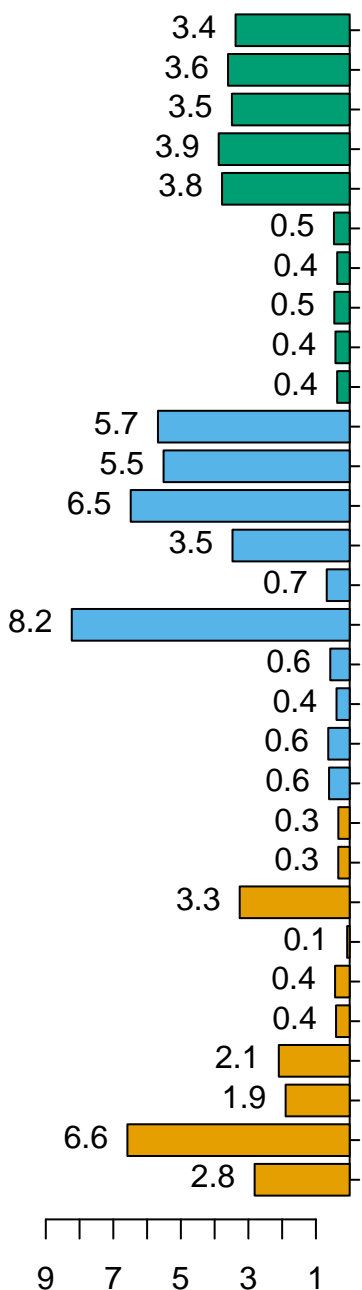

GO Term Name TCGA-KIRP

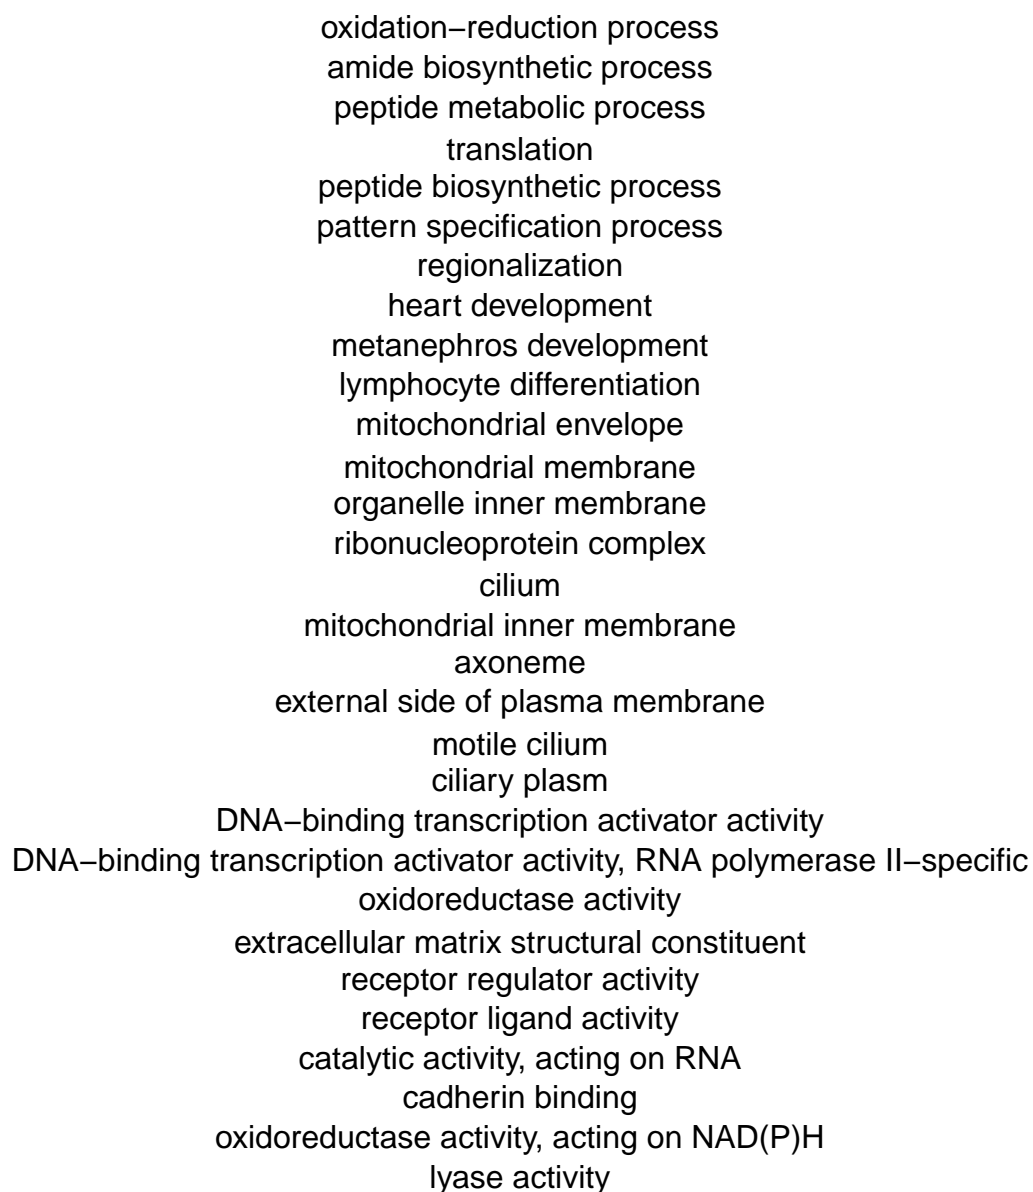

Loss in correlation with THAP9

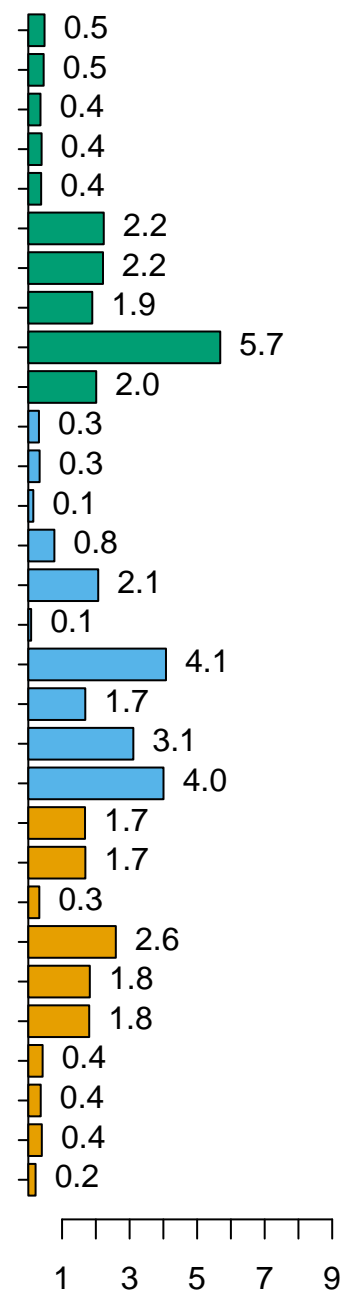

Odds Ratio

Gain in correlation with THAP9

GO Term Name TCGA-LIHC

Loss in correlation with THAP9

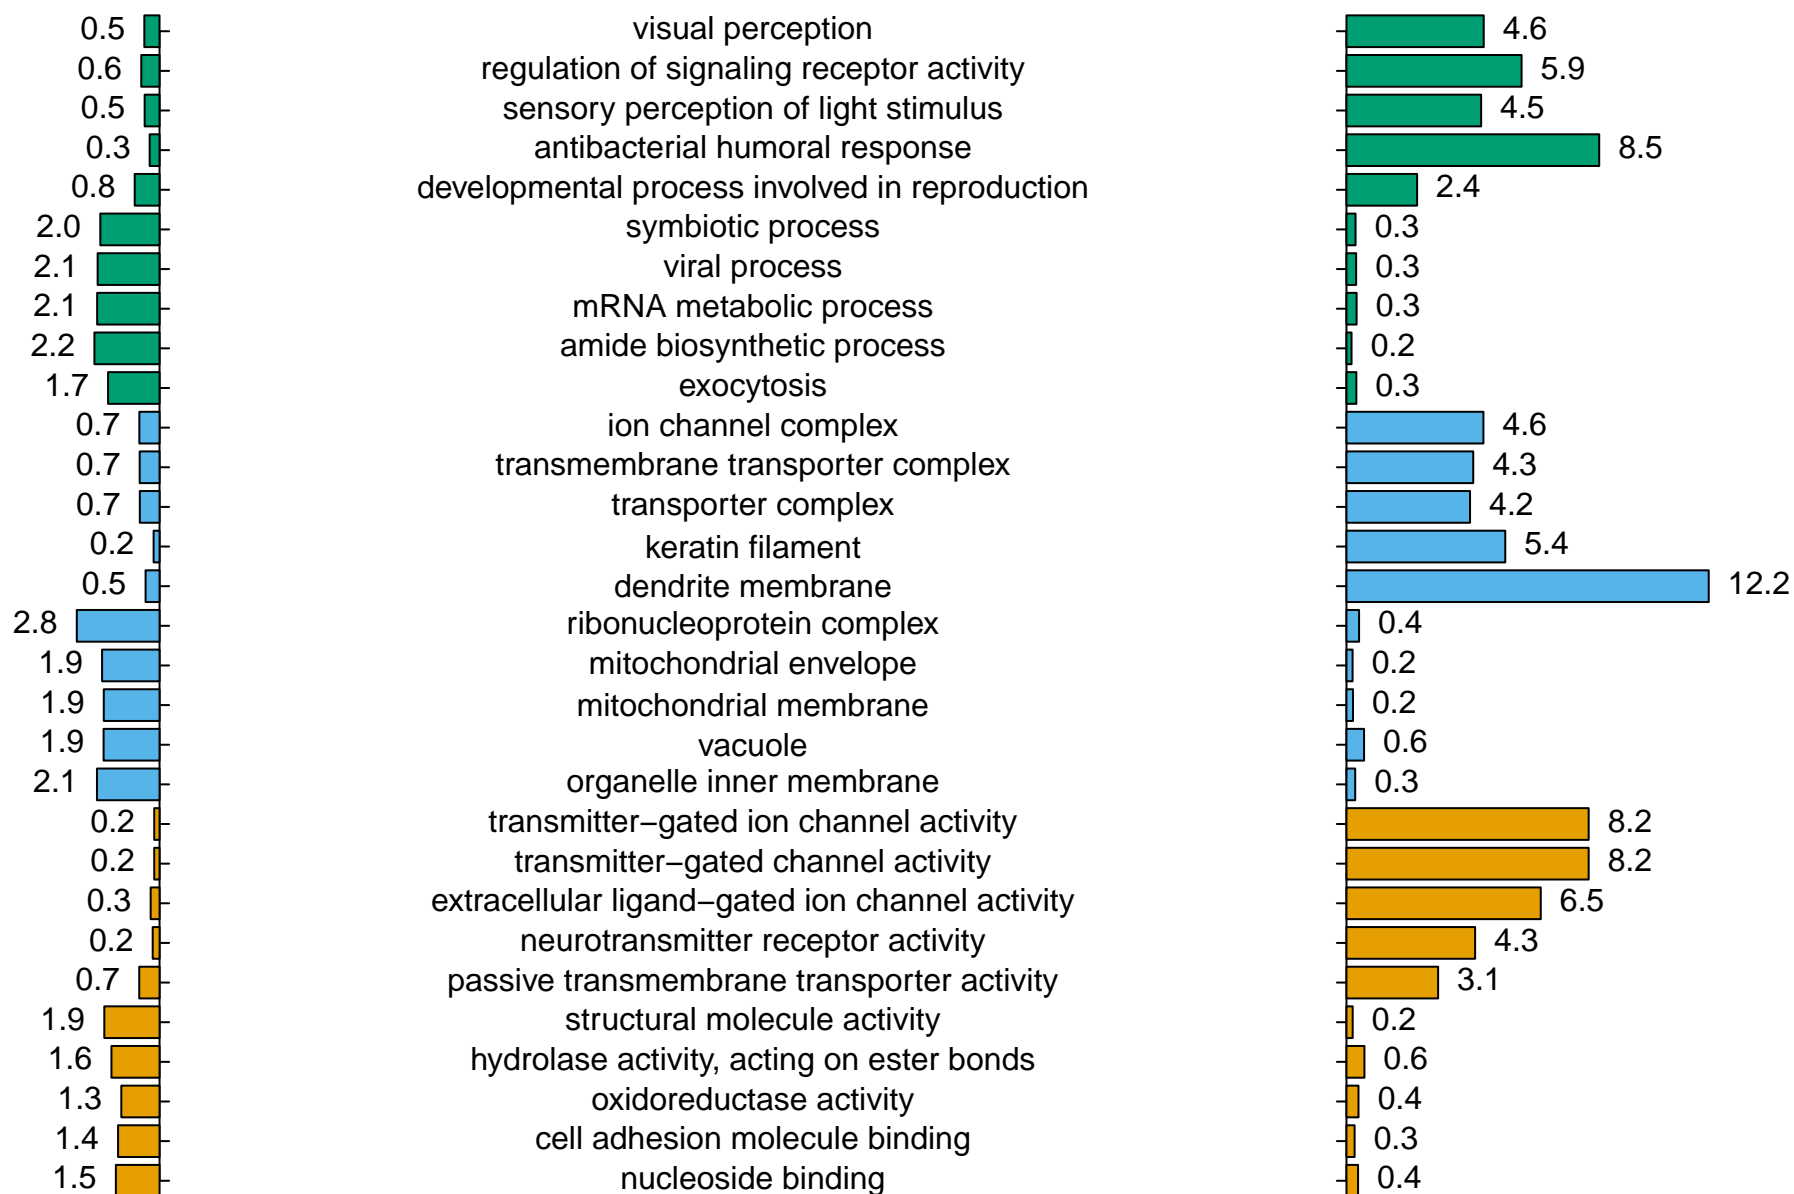

13 10 8 6 4 2

1 3 5 7 9 11

Odds Ratio

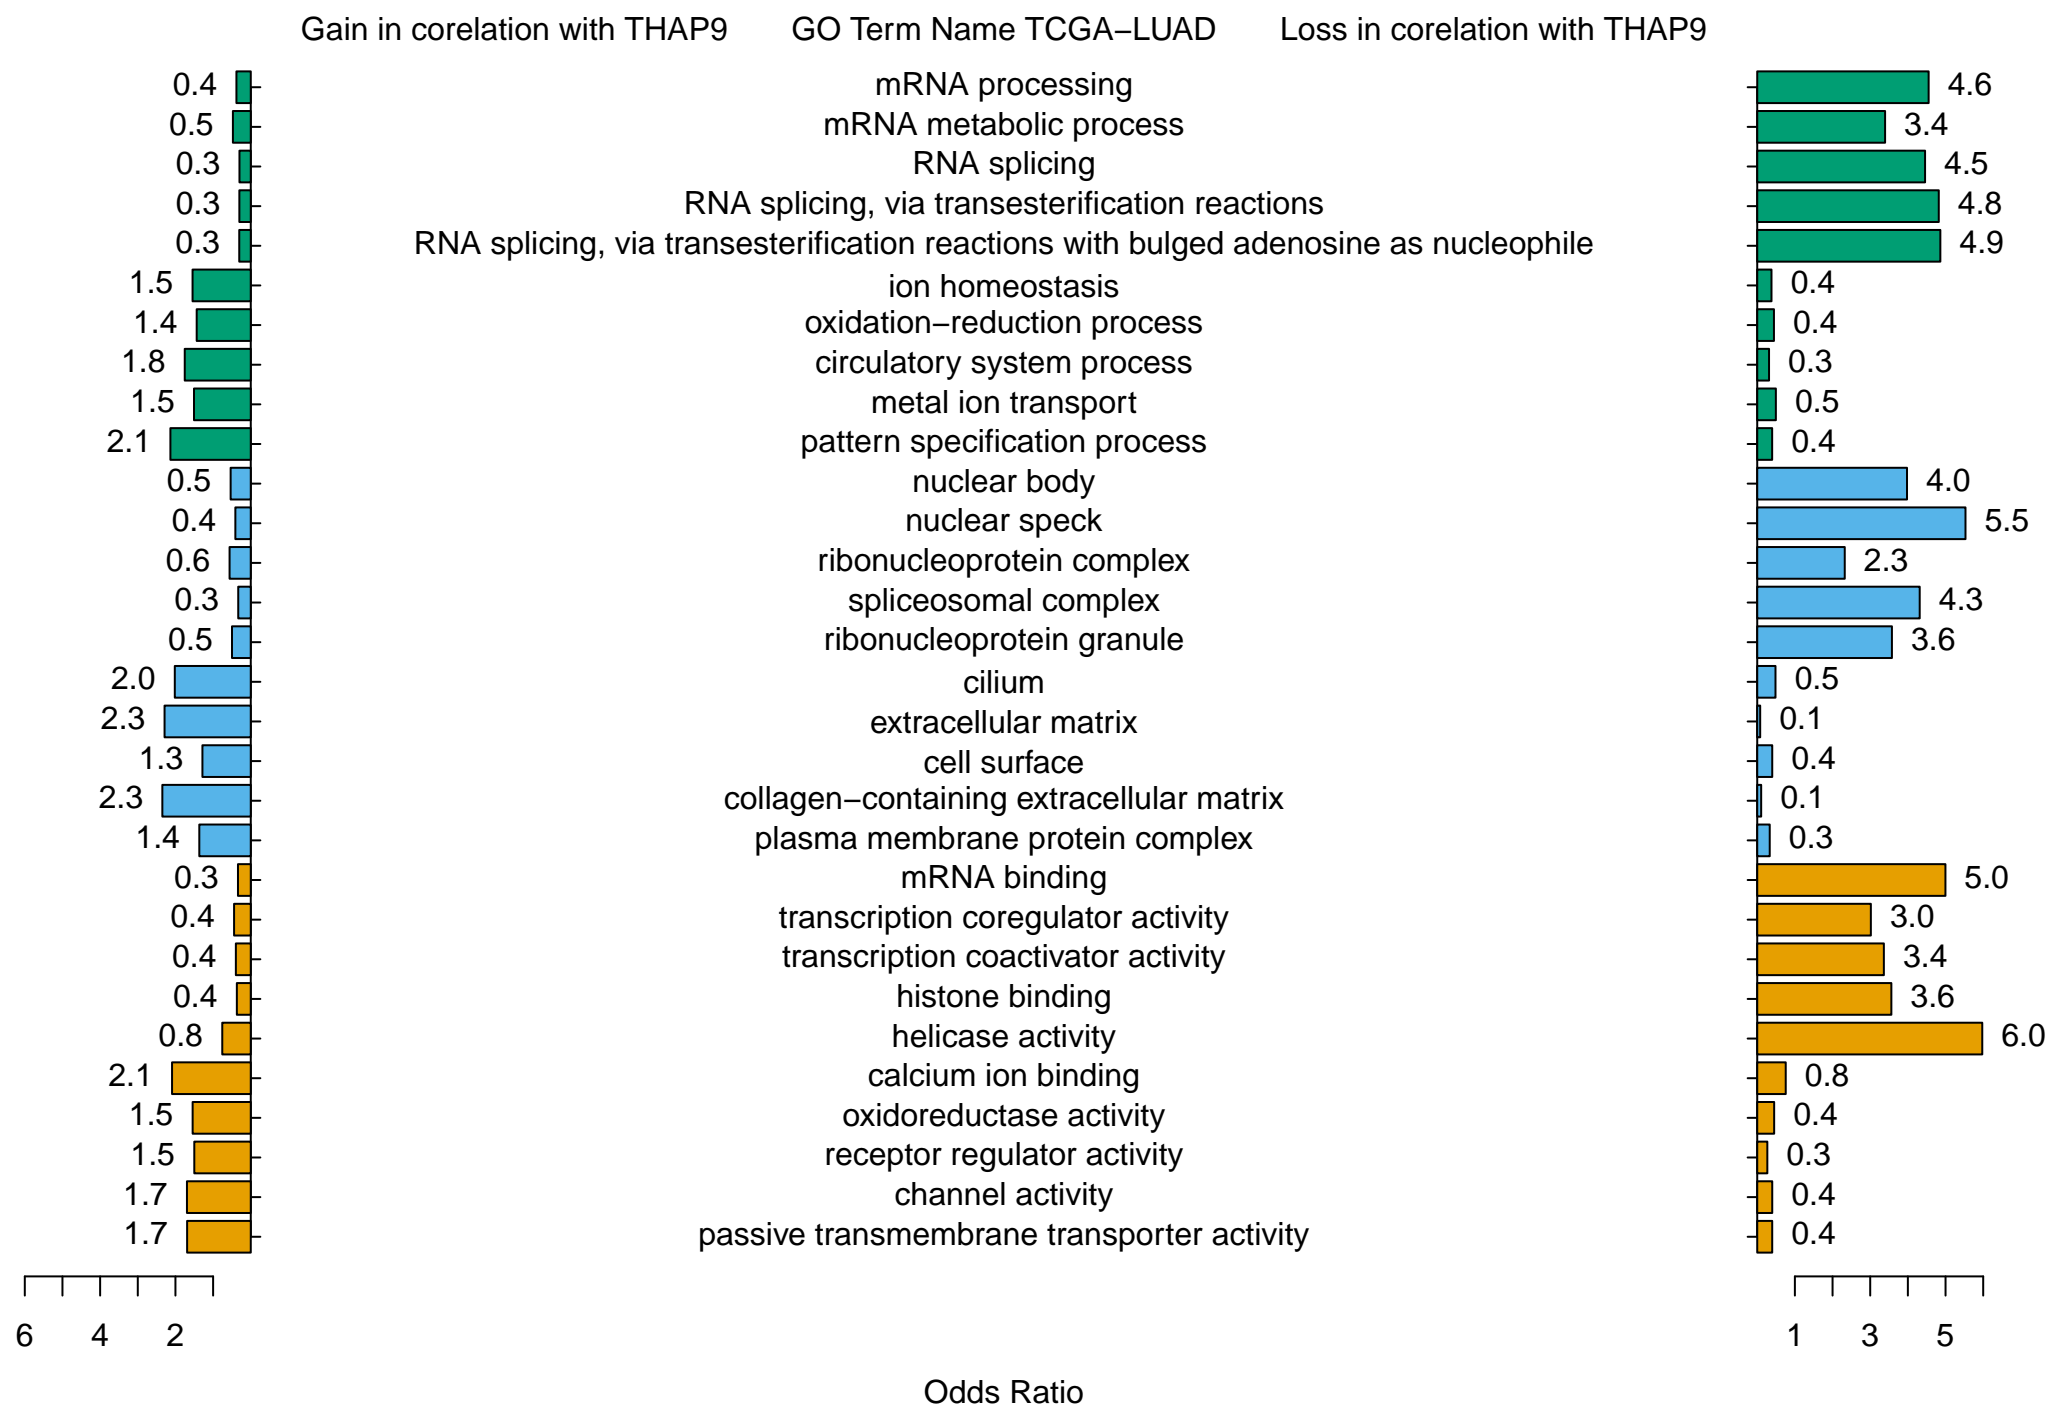

Gain in correlation with THAP9

GO Term Name TCGA-LUSC

Loss in correlation with THAP9

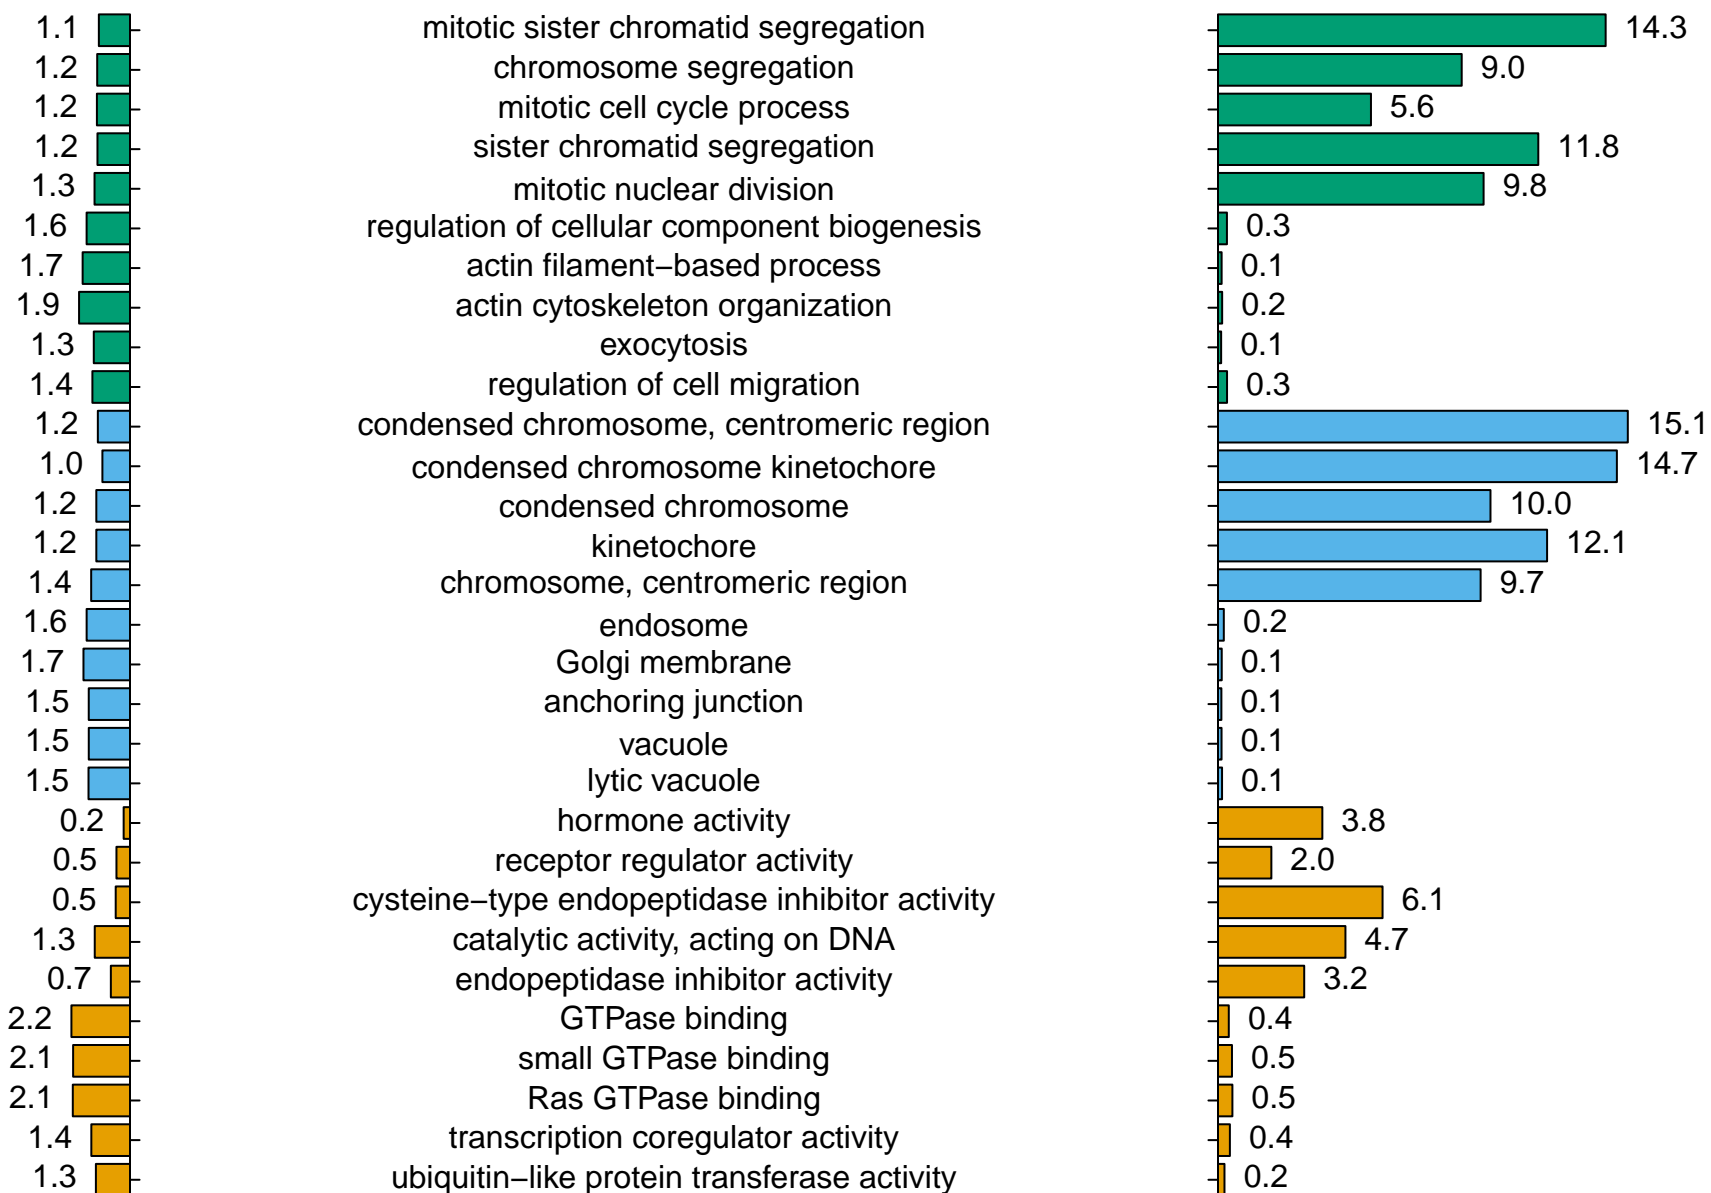

16 13 10 8 6 4 2

1 3 5 7 9 11 14

Odds Ratio

Gain in corelation with THAP9

GO Term Name TCGA-PAAD

Loss in corelation with THAP9

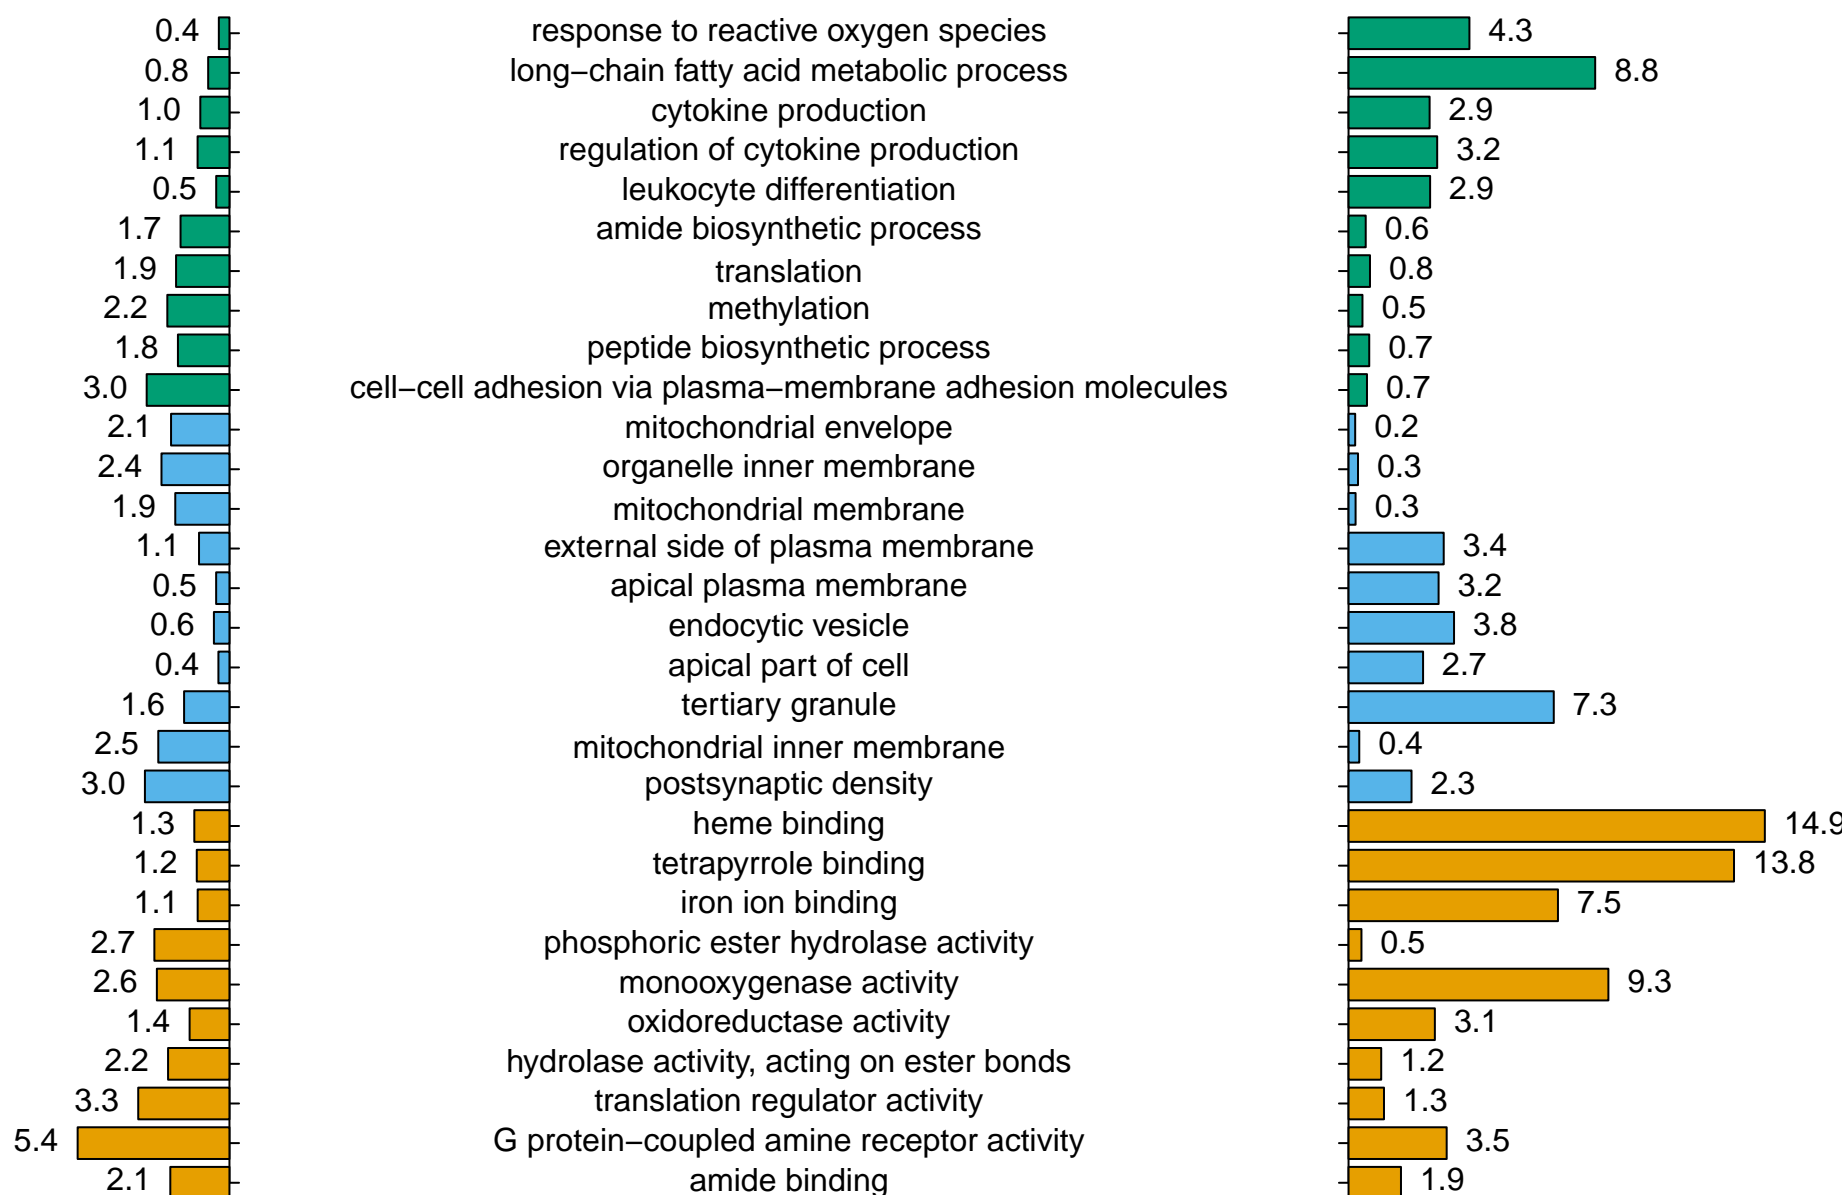

15 12 9 7 5 3 1

1 3 5 7 9 11 14

Odds Ratio

Gain in correlation with THAP9

GO Term Name TCGA-PRAD

Loss in correlation with THAP9

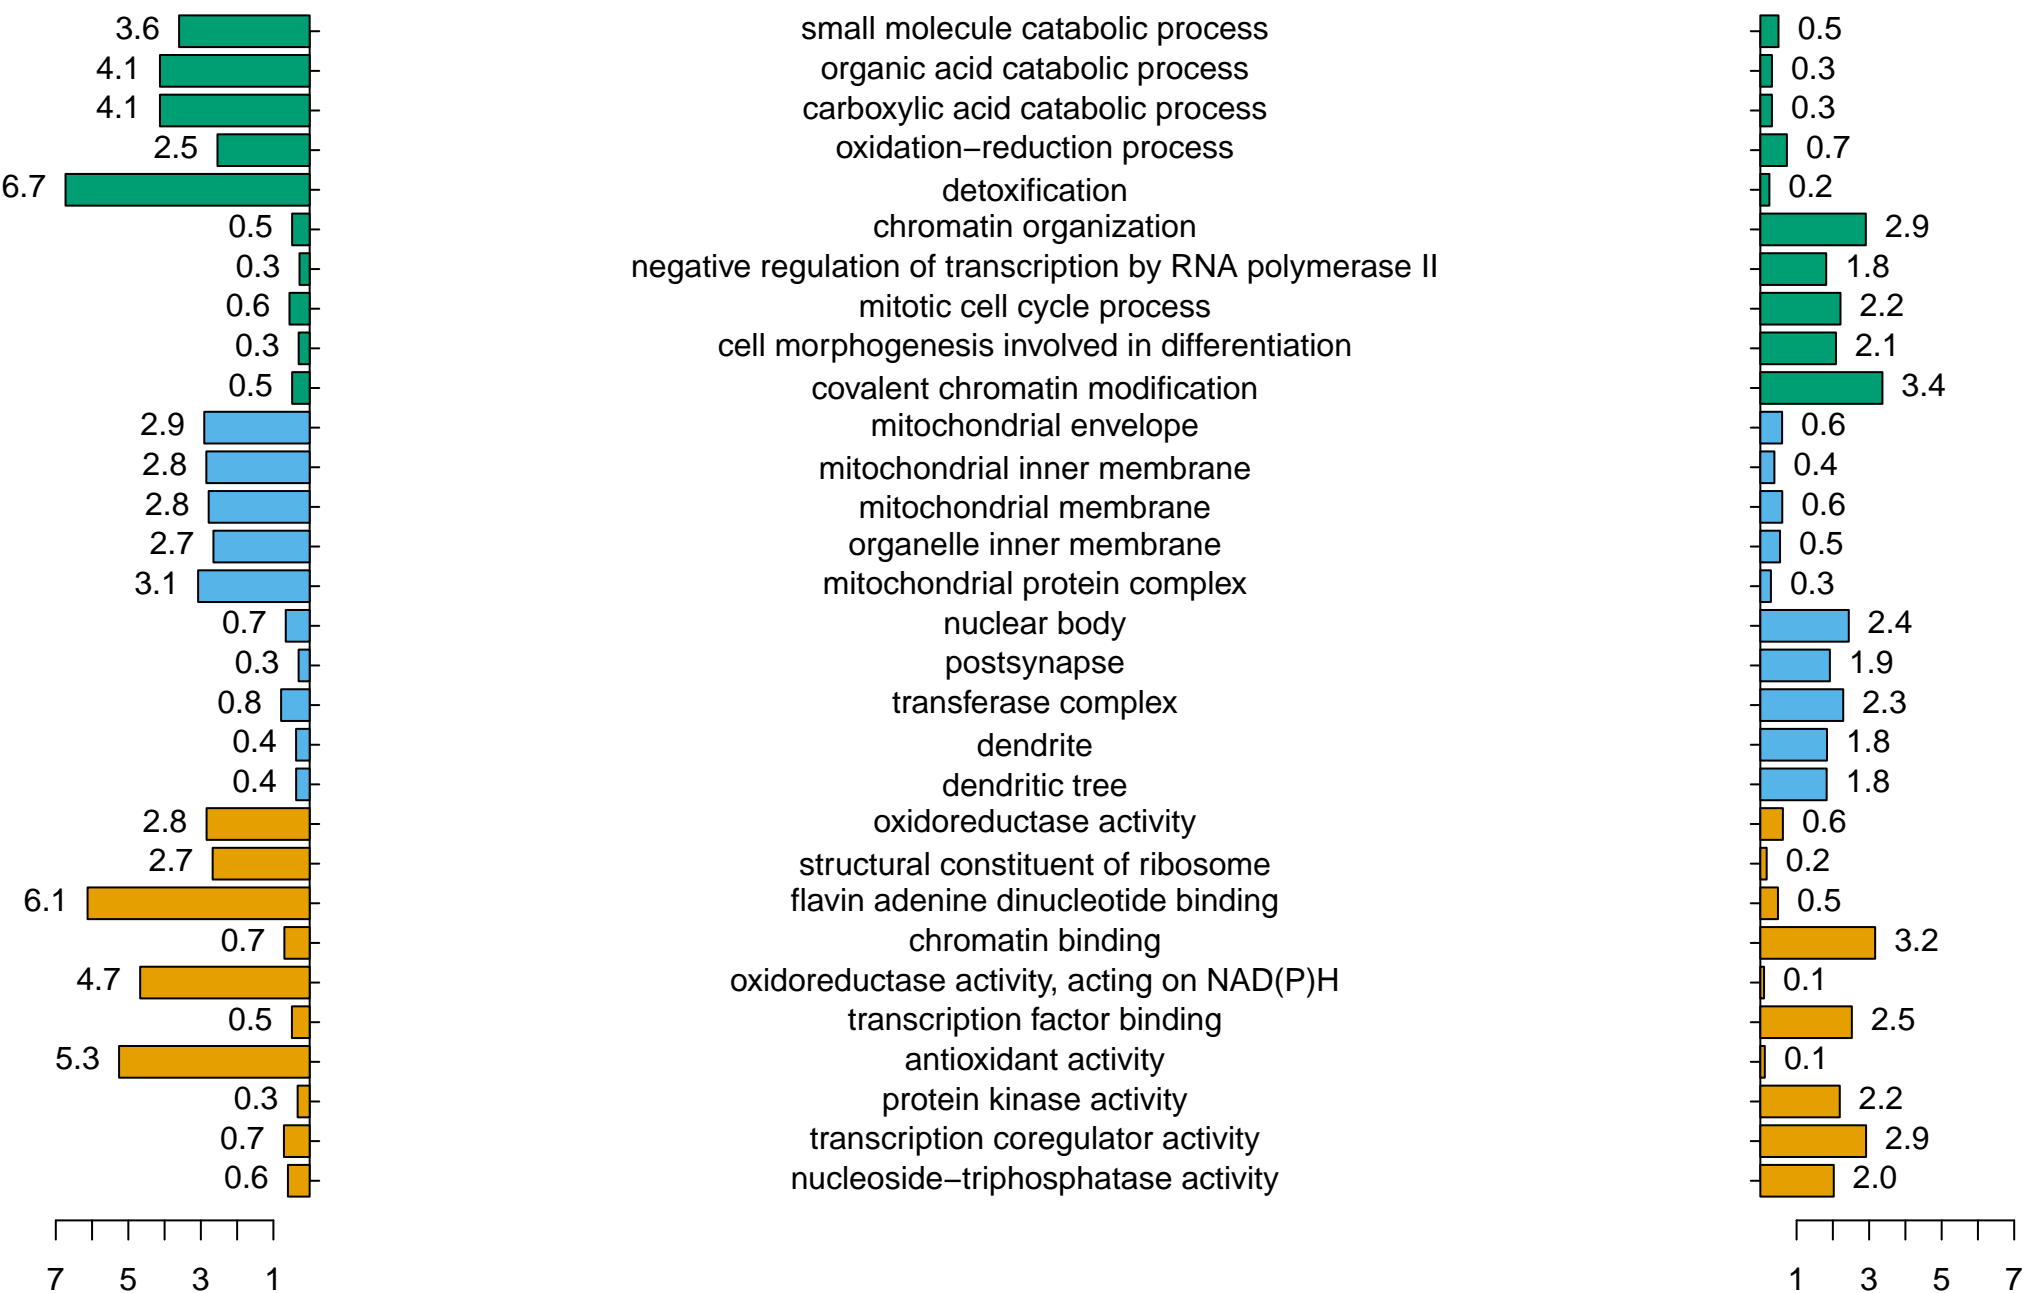

Odds Ratio

Gain in correlation with THAP9

GO Term Name TCGA-READ

Loss in correlation with THAP9

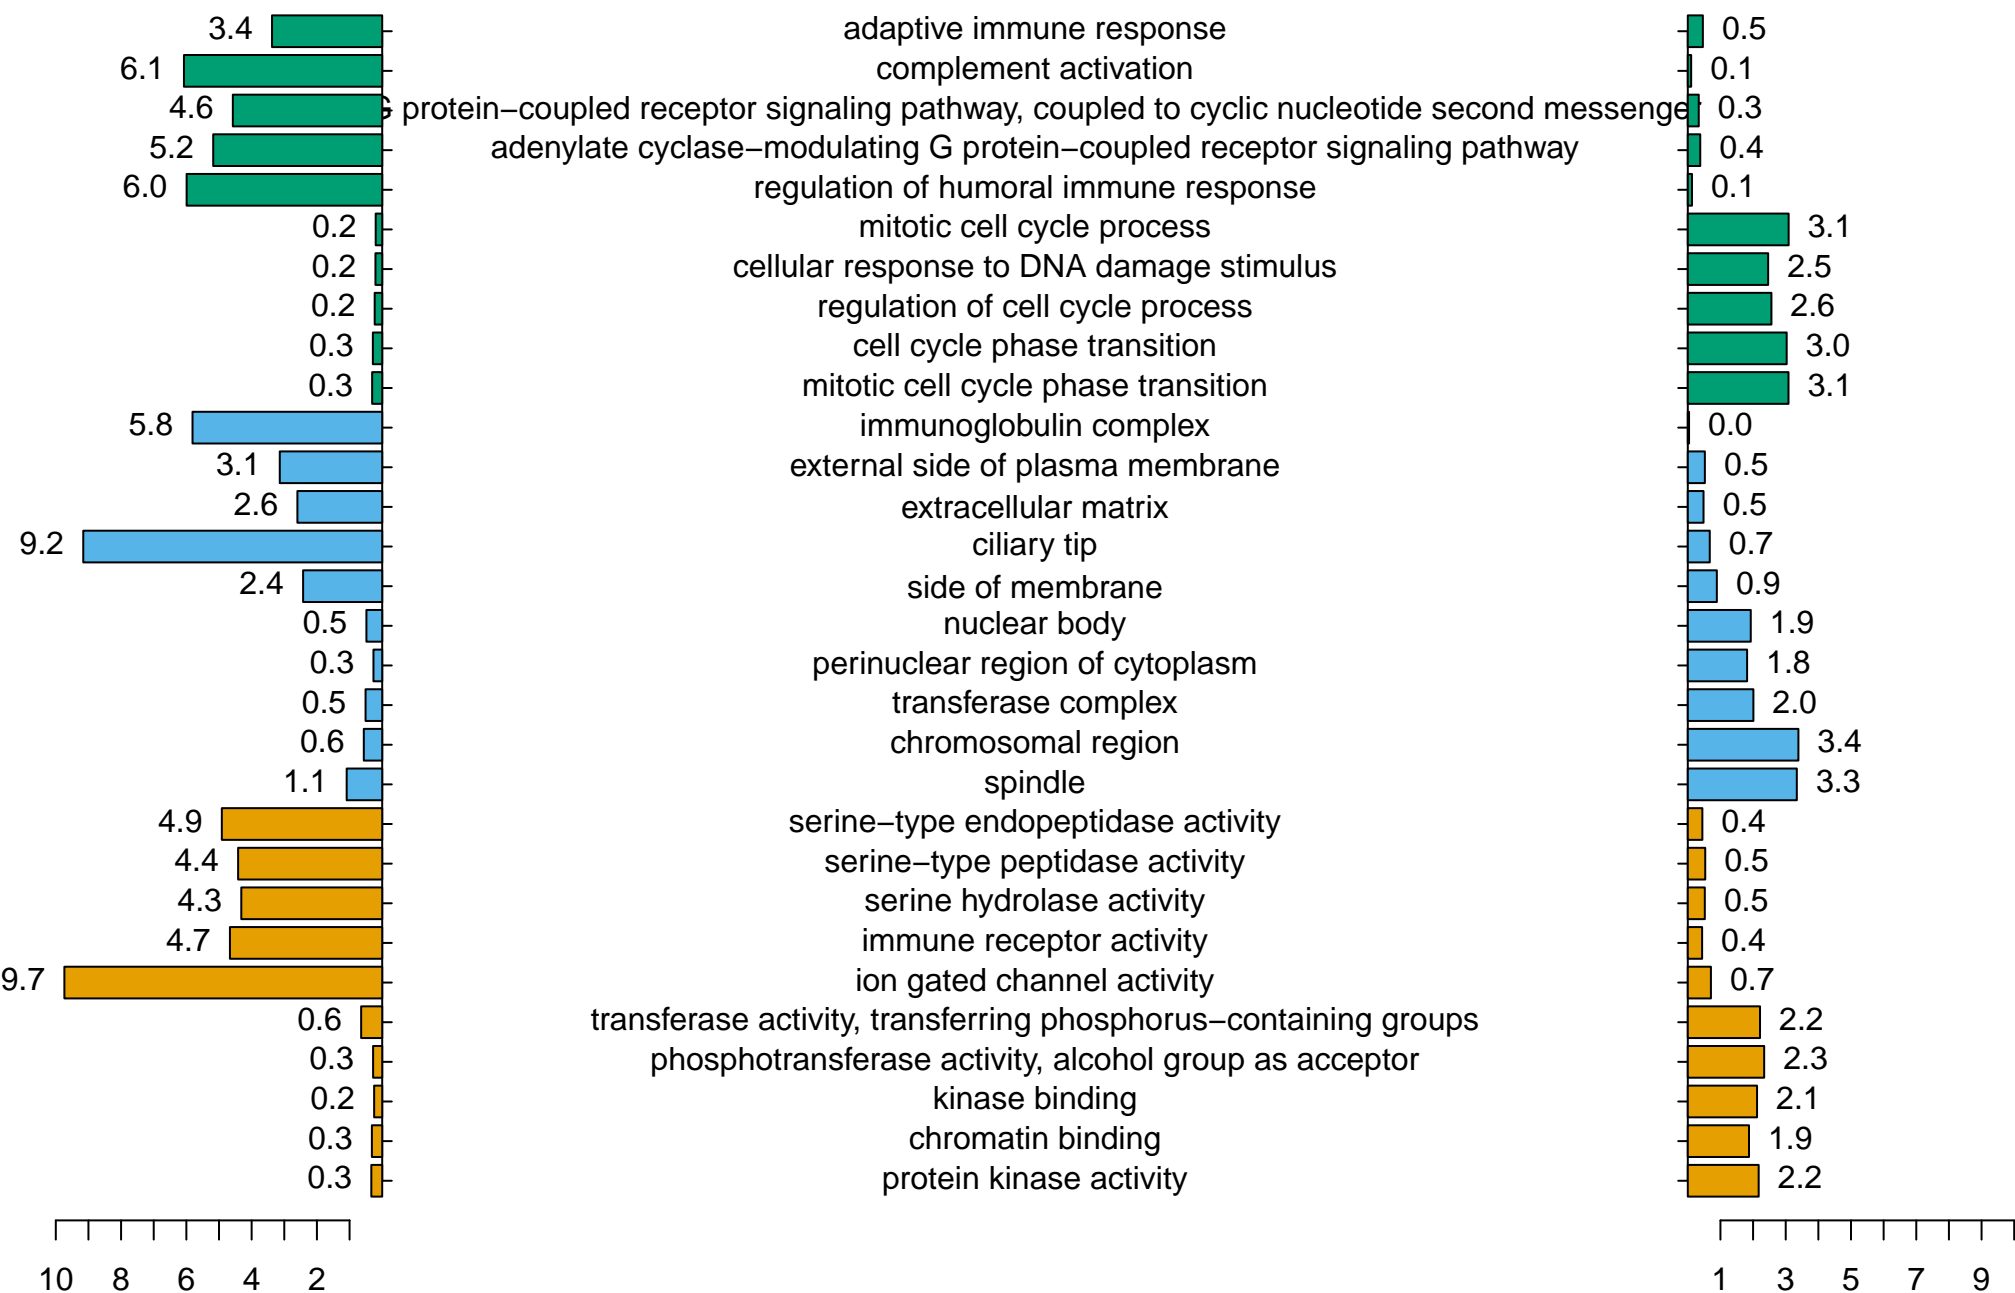

Odds Ratio



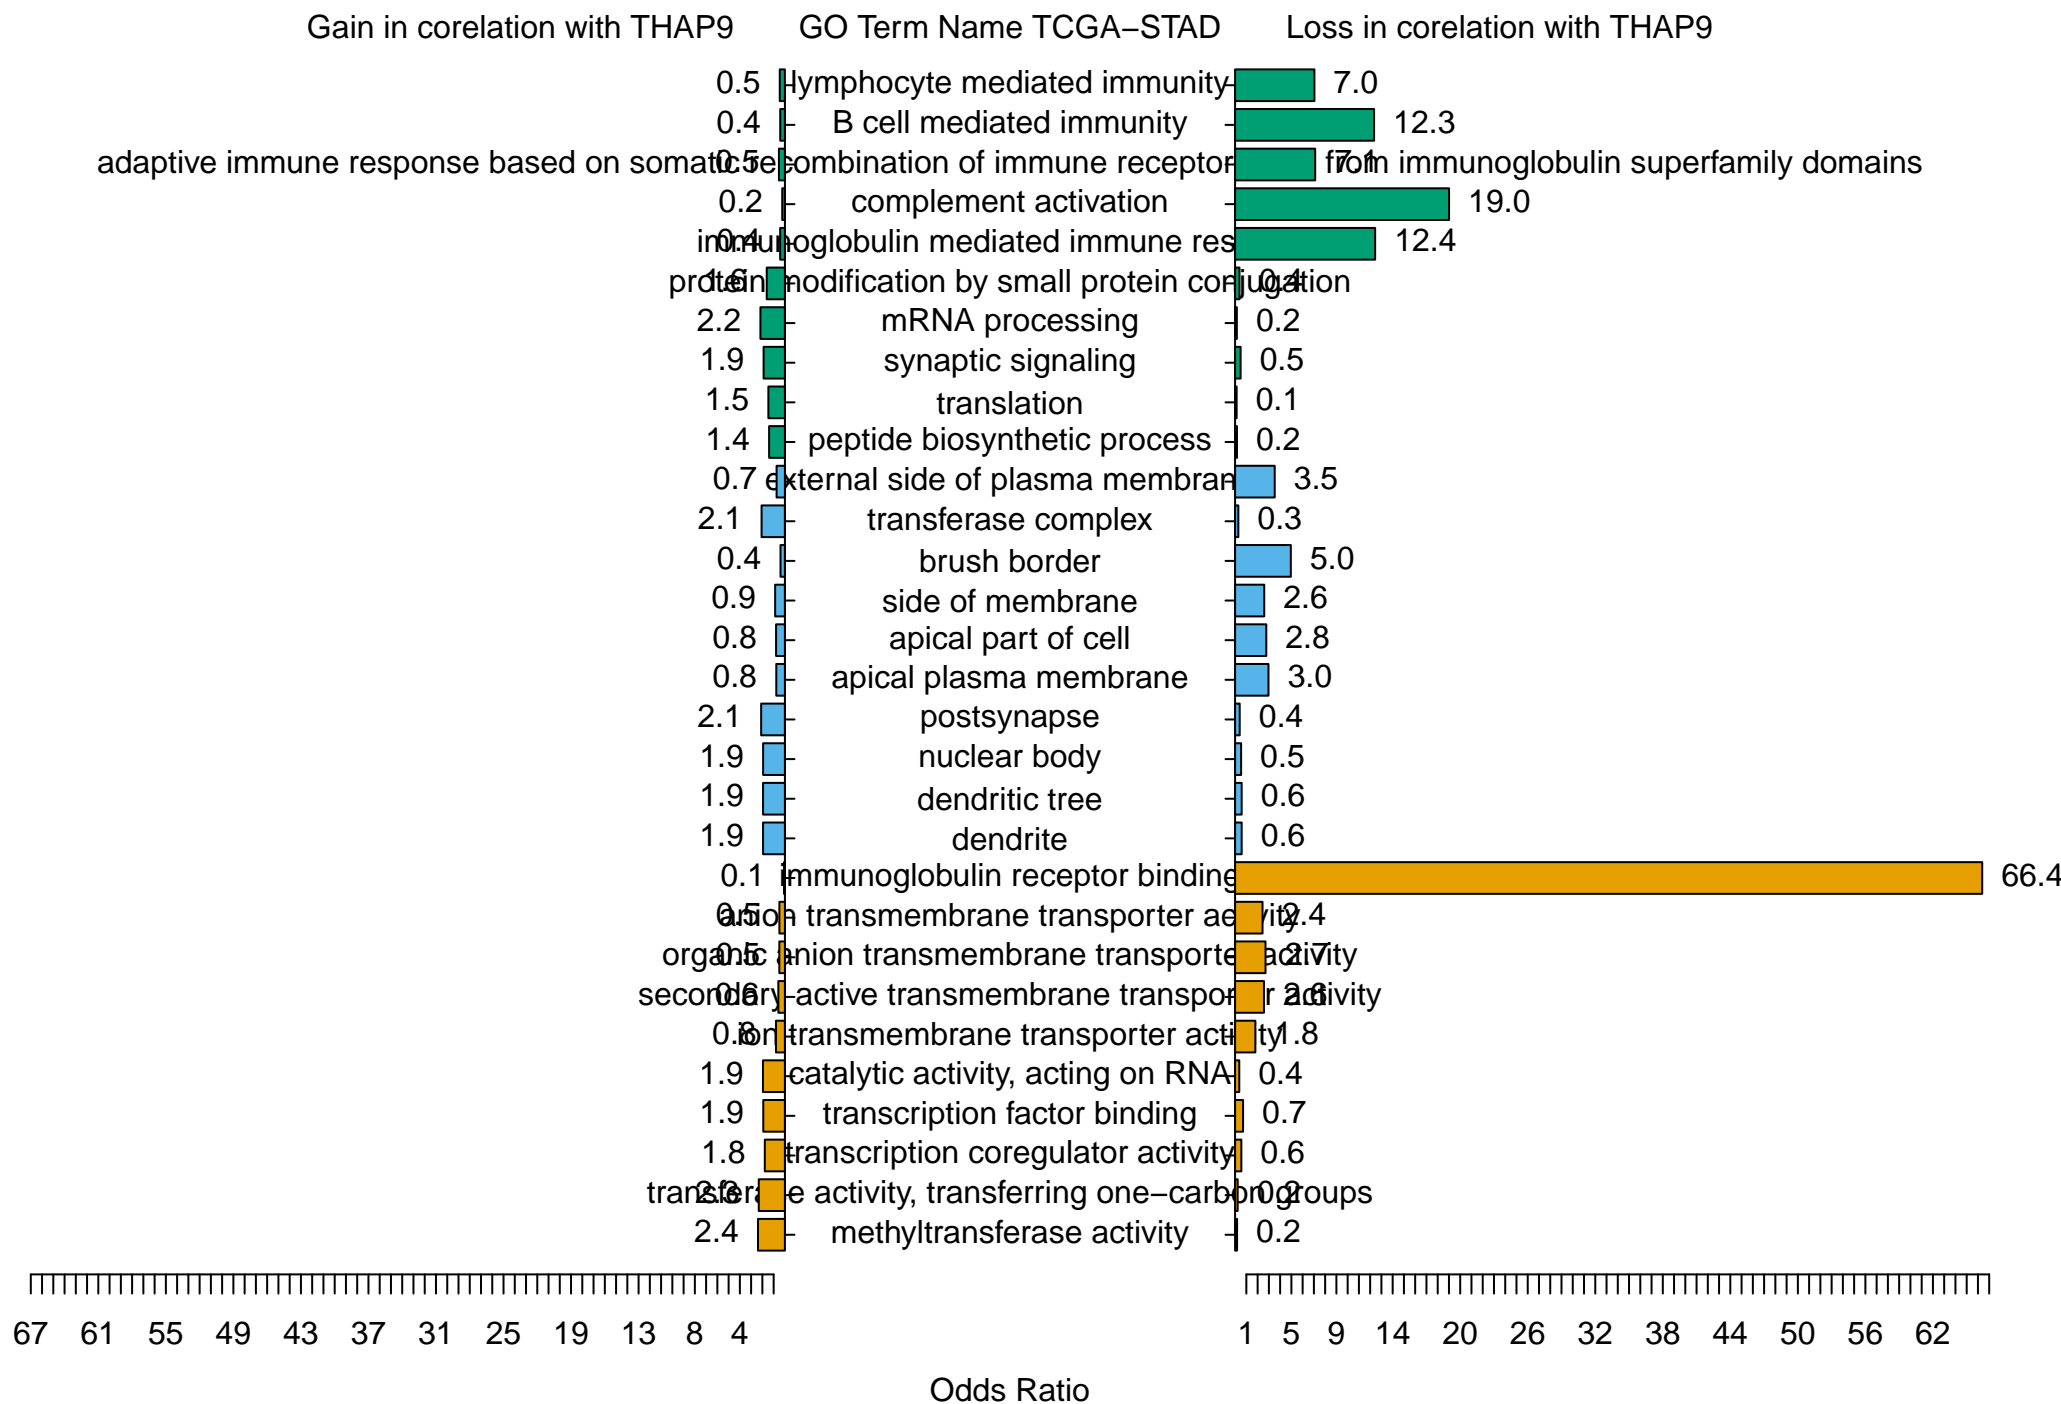

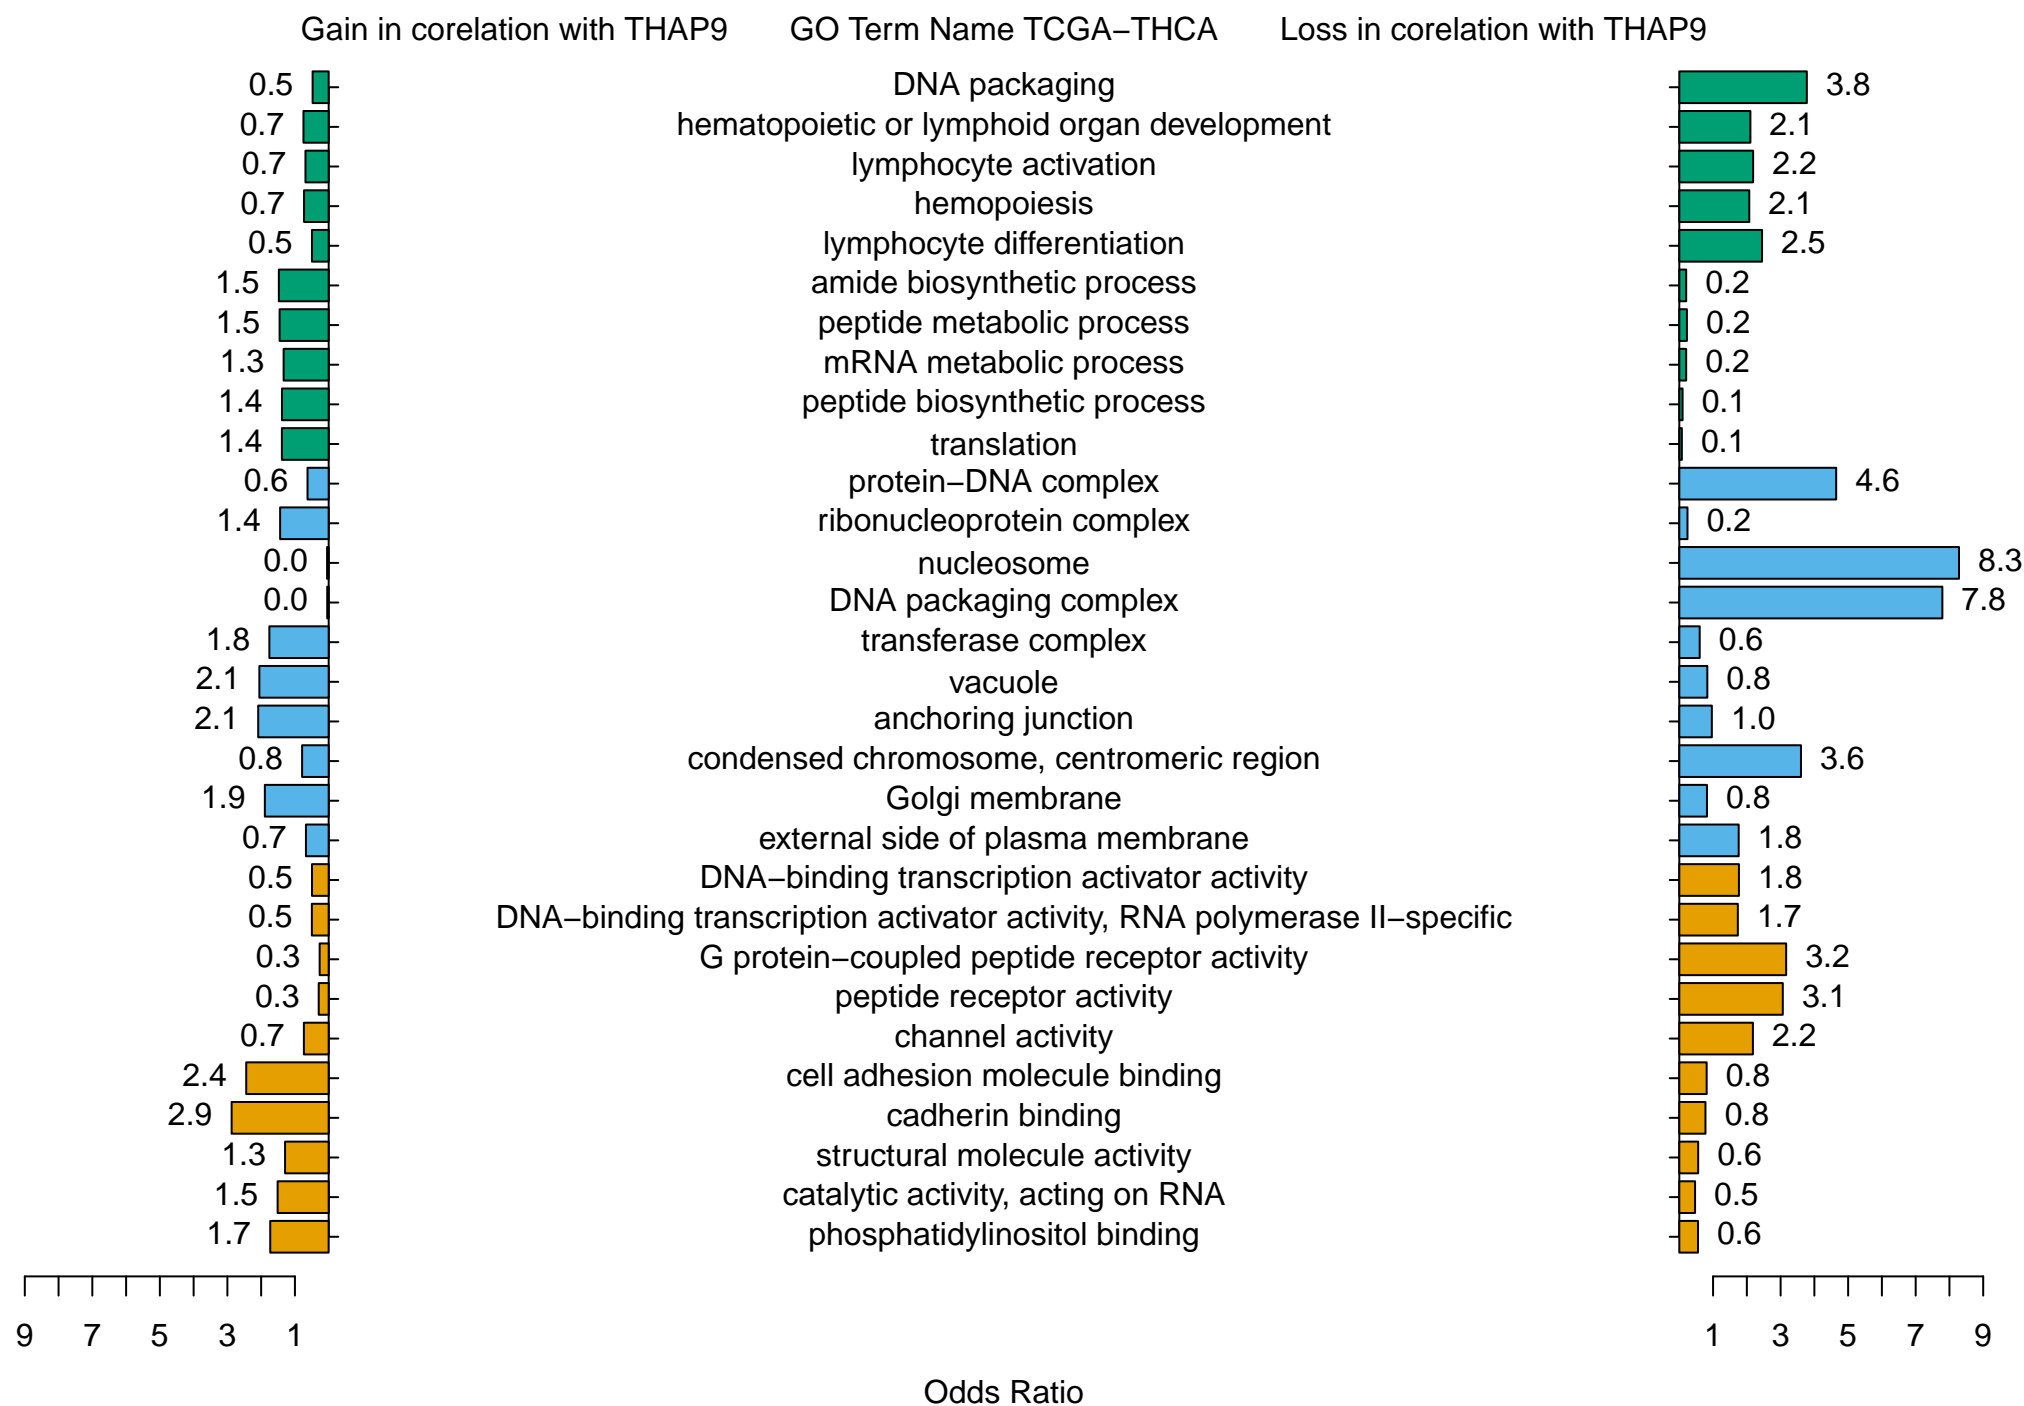

Gain in correlation with THAP9

GO Term Name TCGA-UCEC

Loss in correlation with THAP9

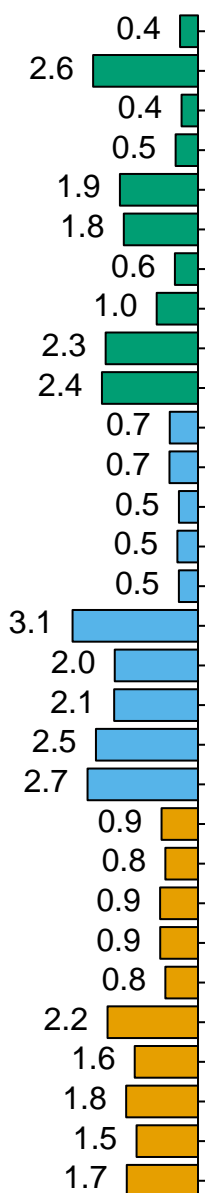

4 2

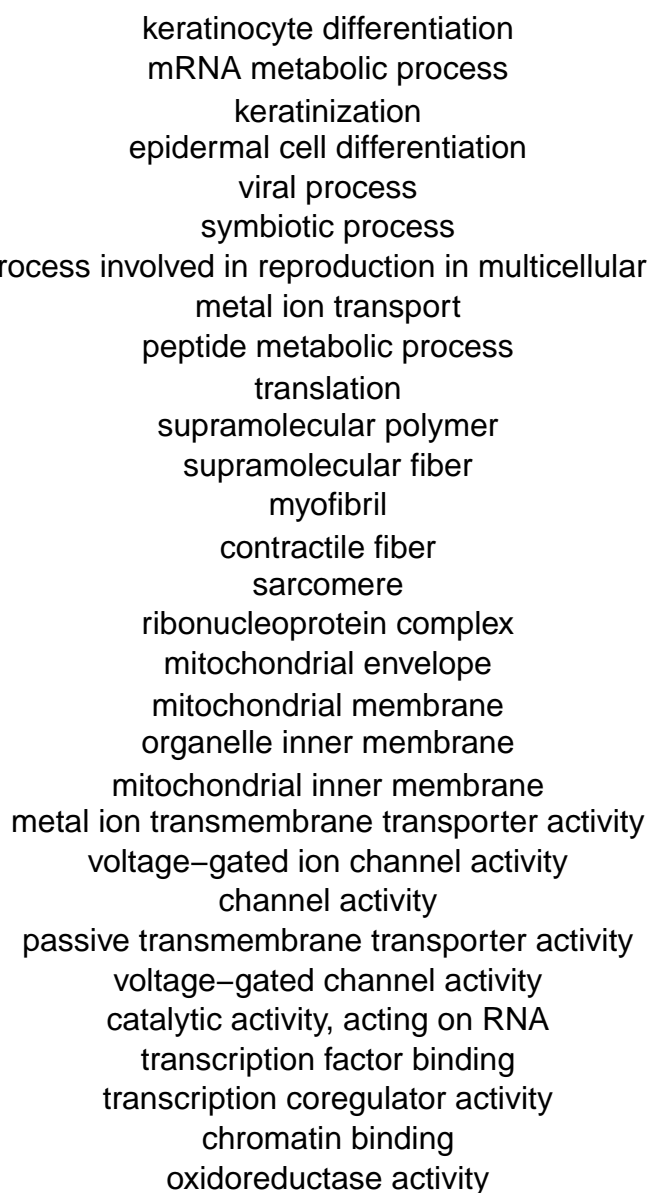

1 3

Odds Ratio
