# Supplementary material
Source: MDPI journal article supplement (https://www.mdpi.com/2311-553X/8/4/51)

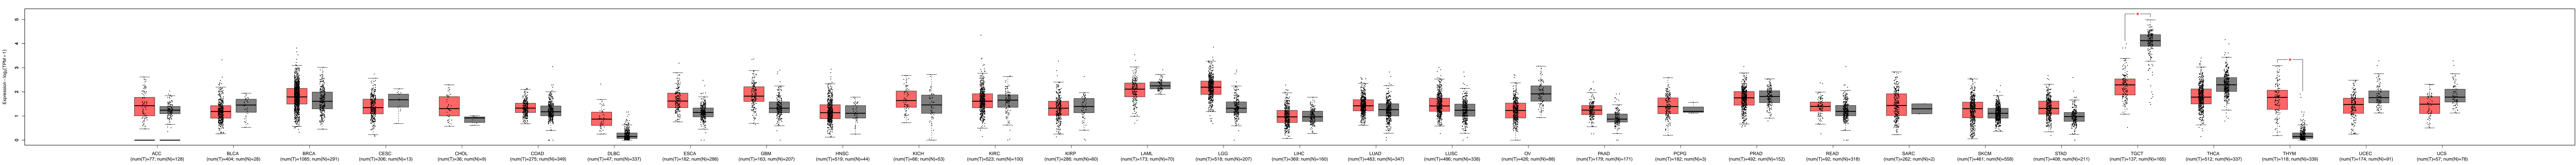

Supplement: s1 [file s1]

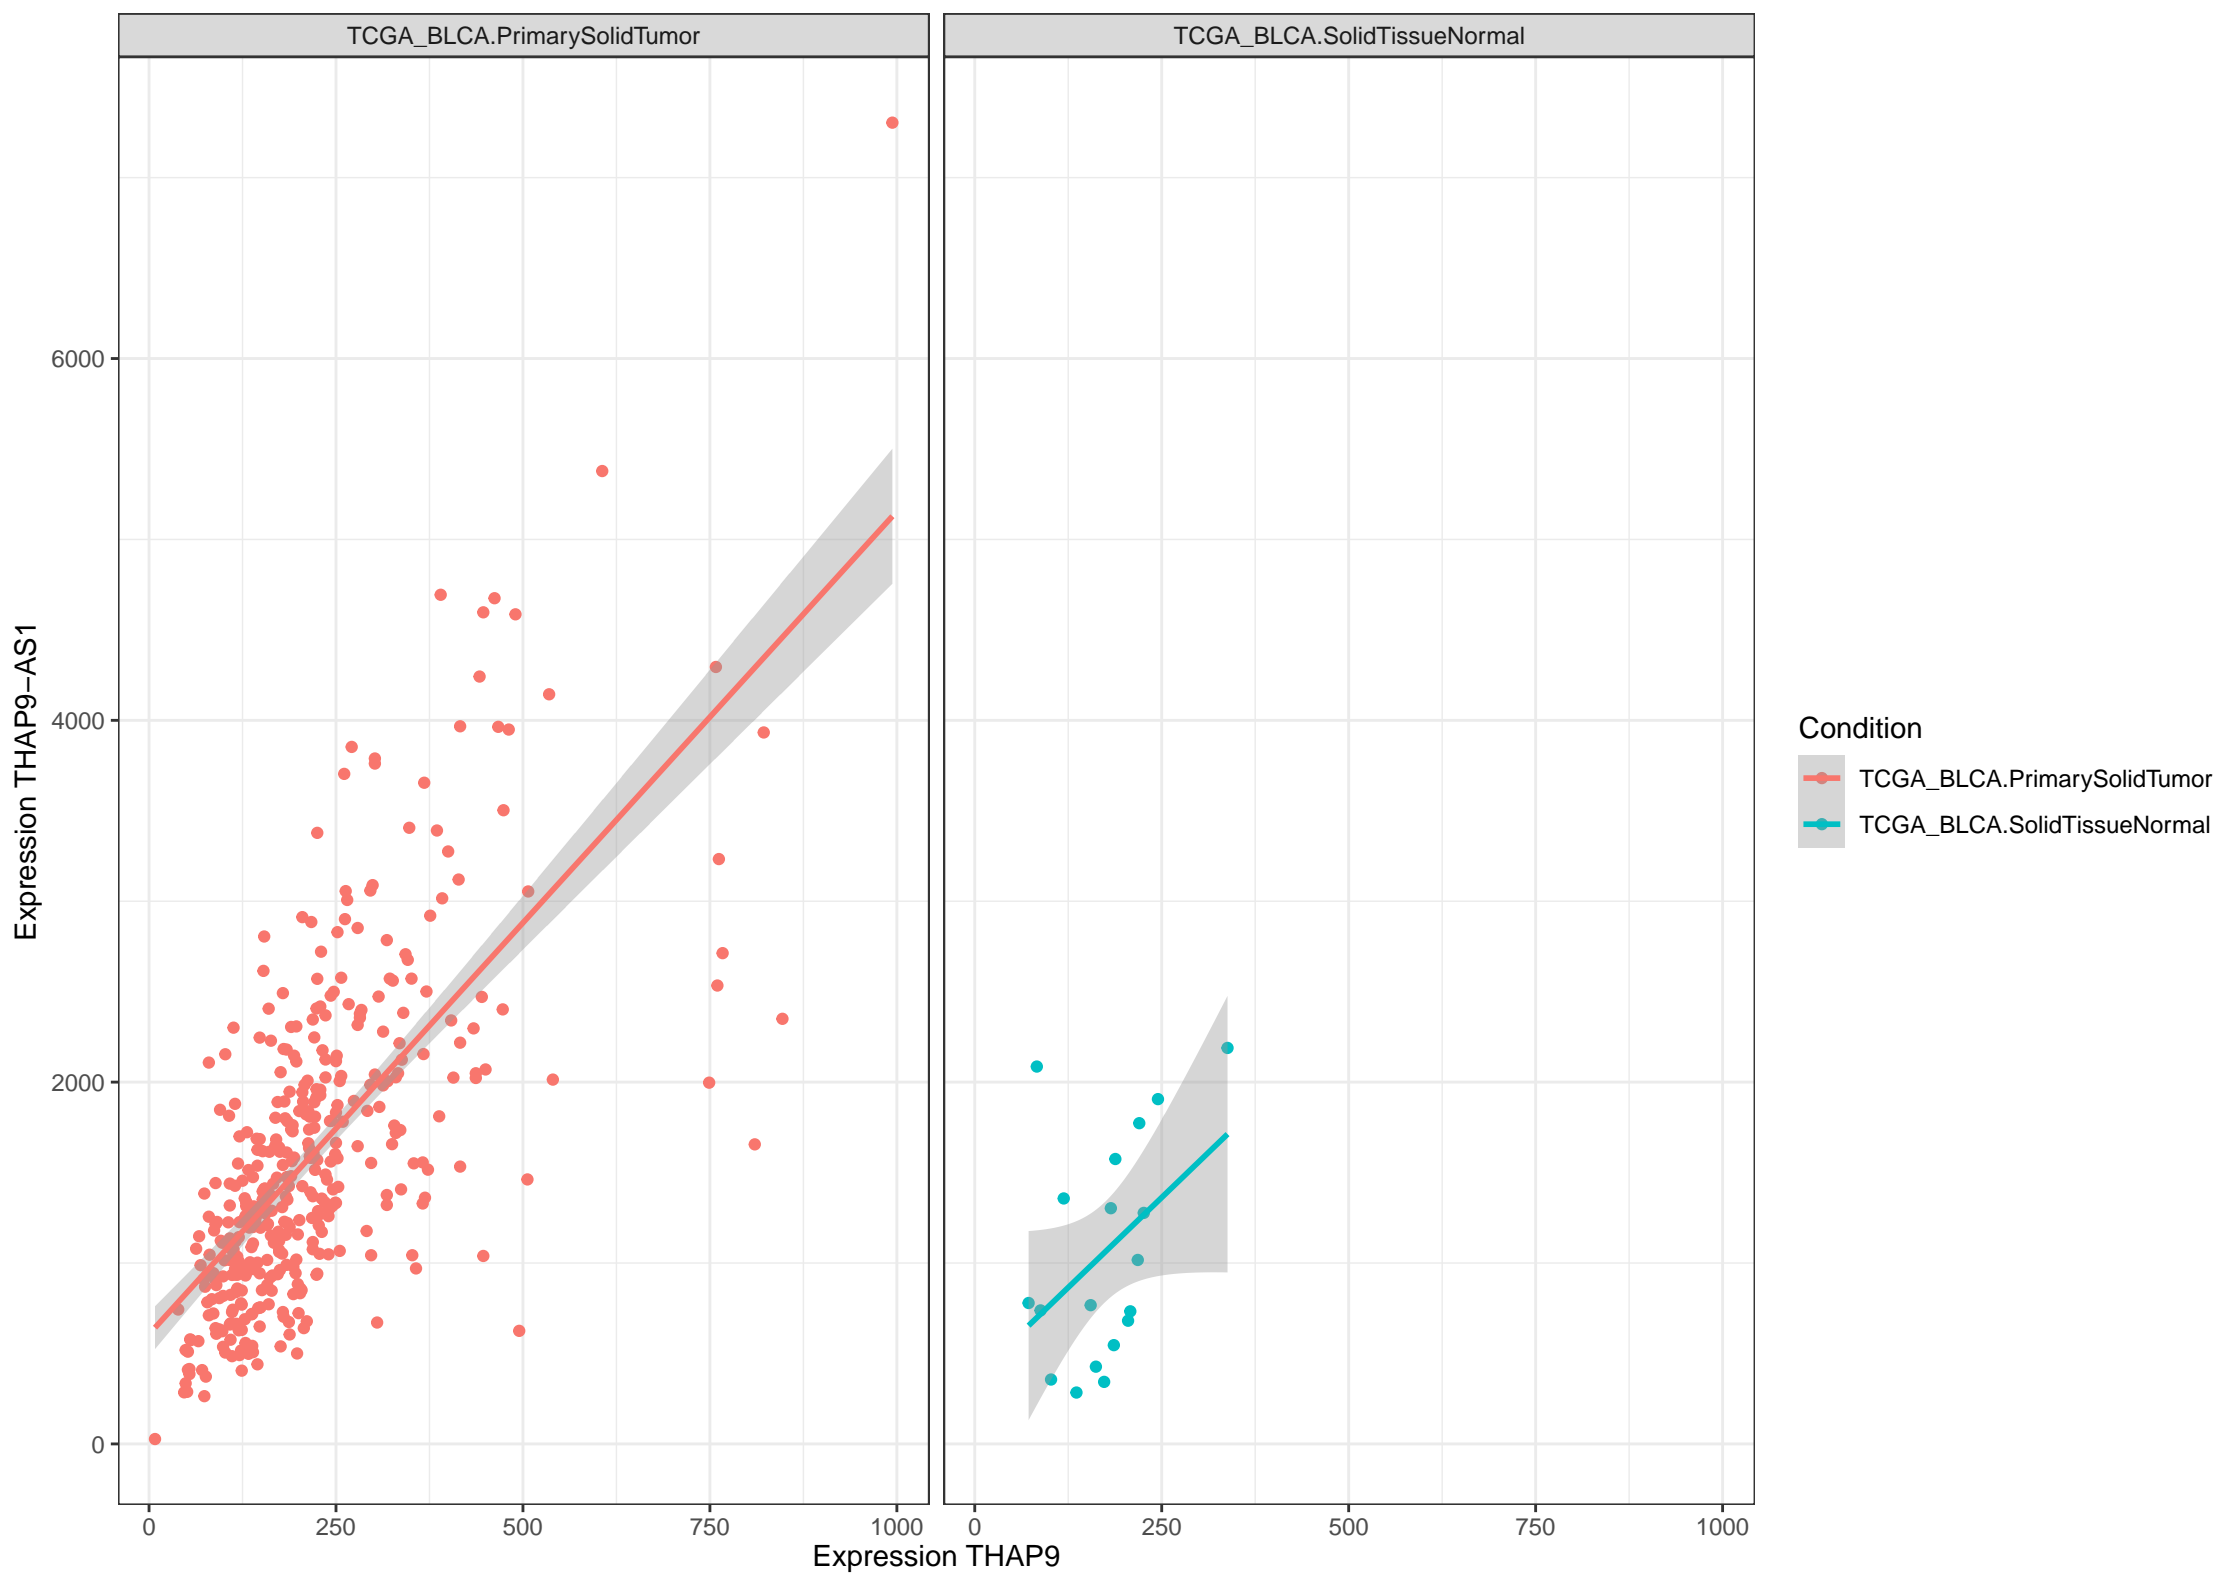

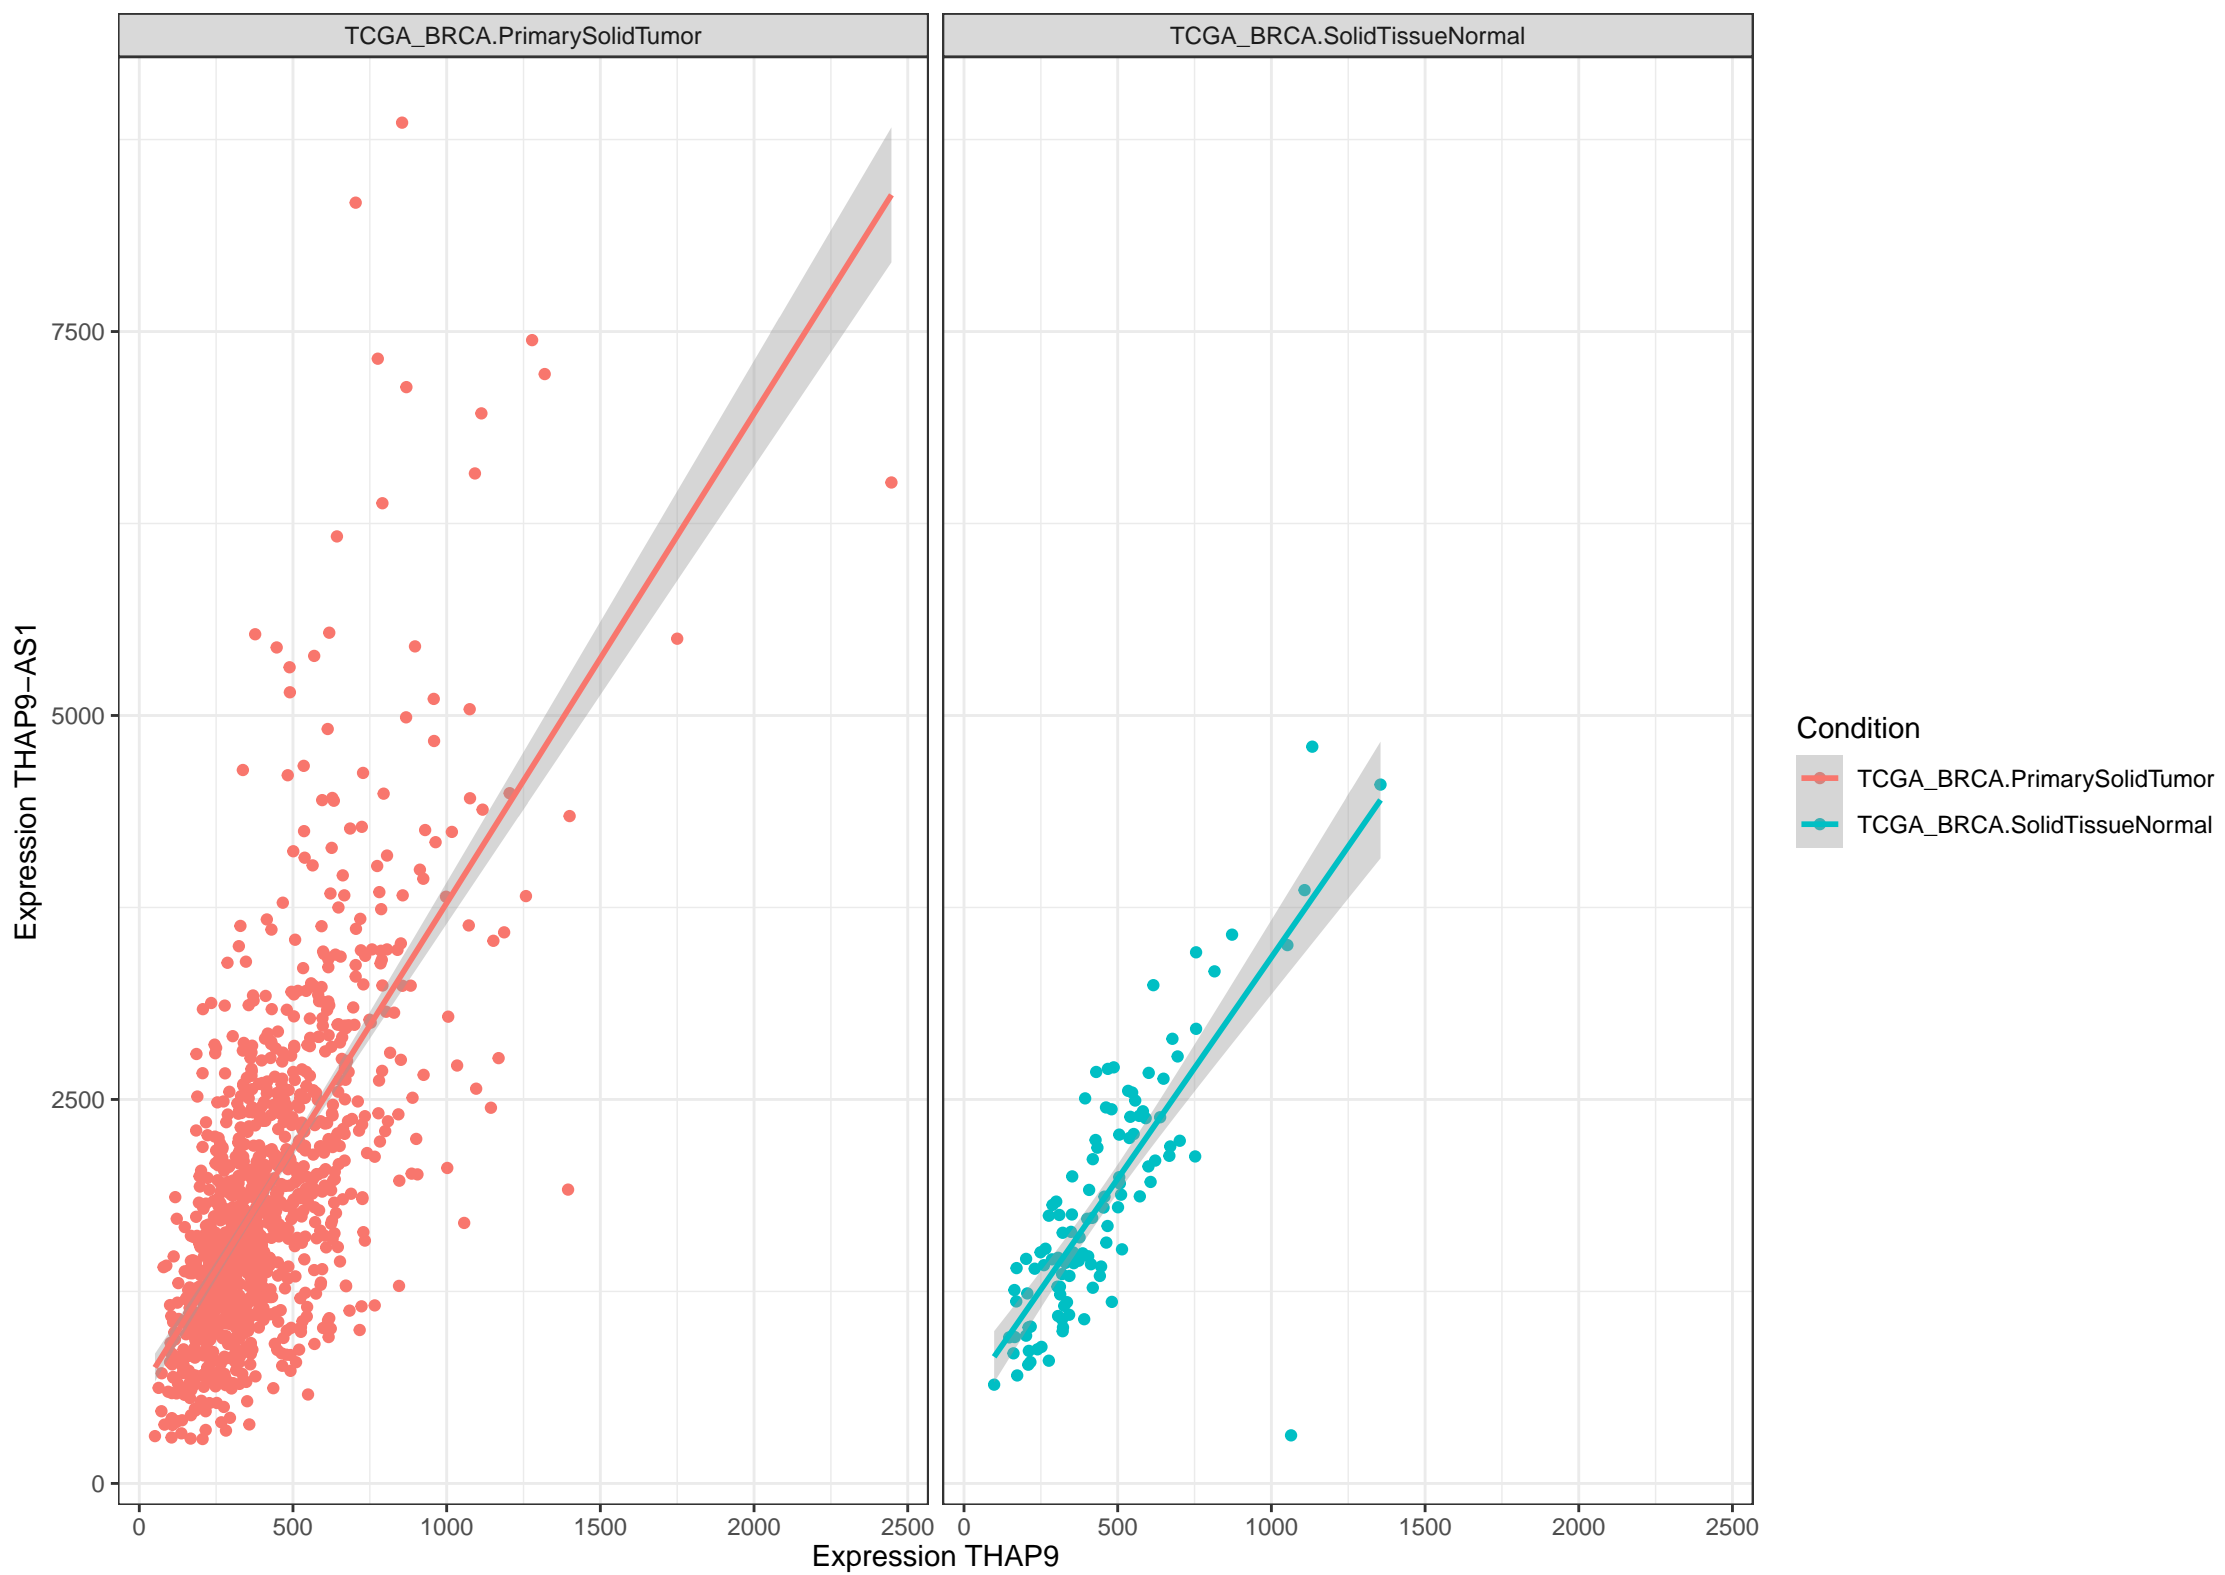

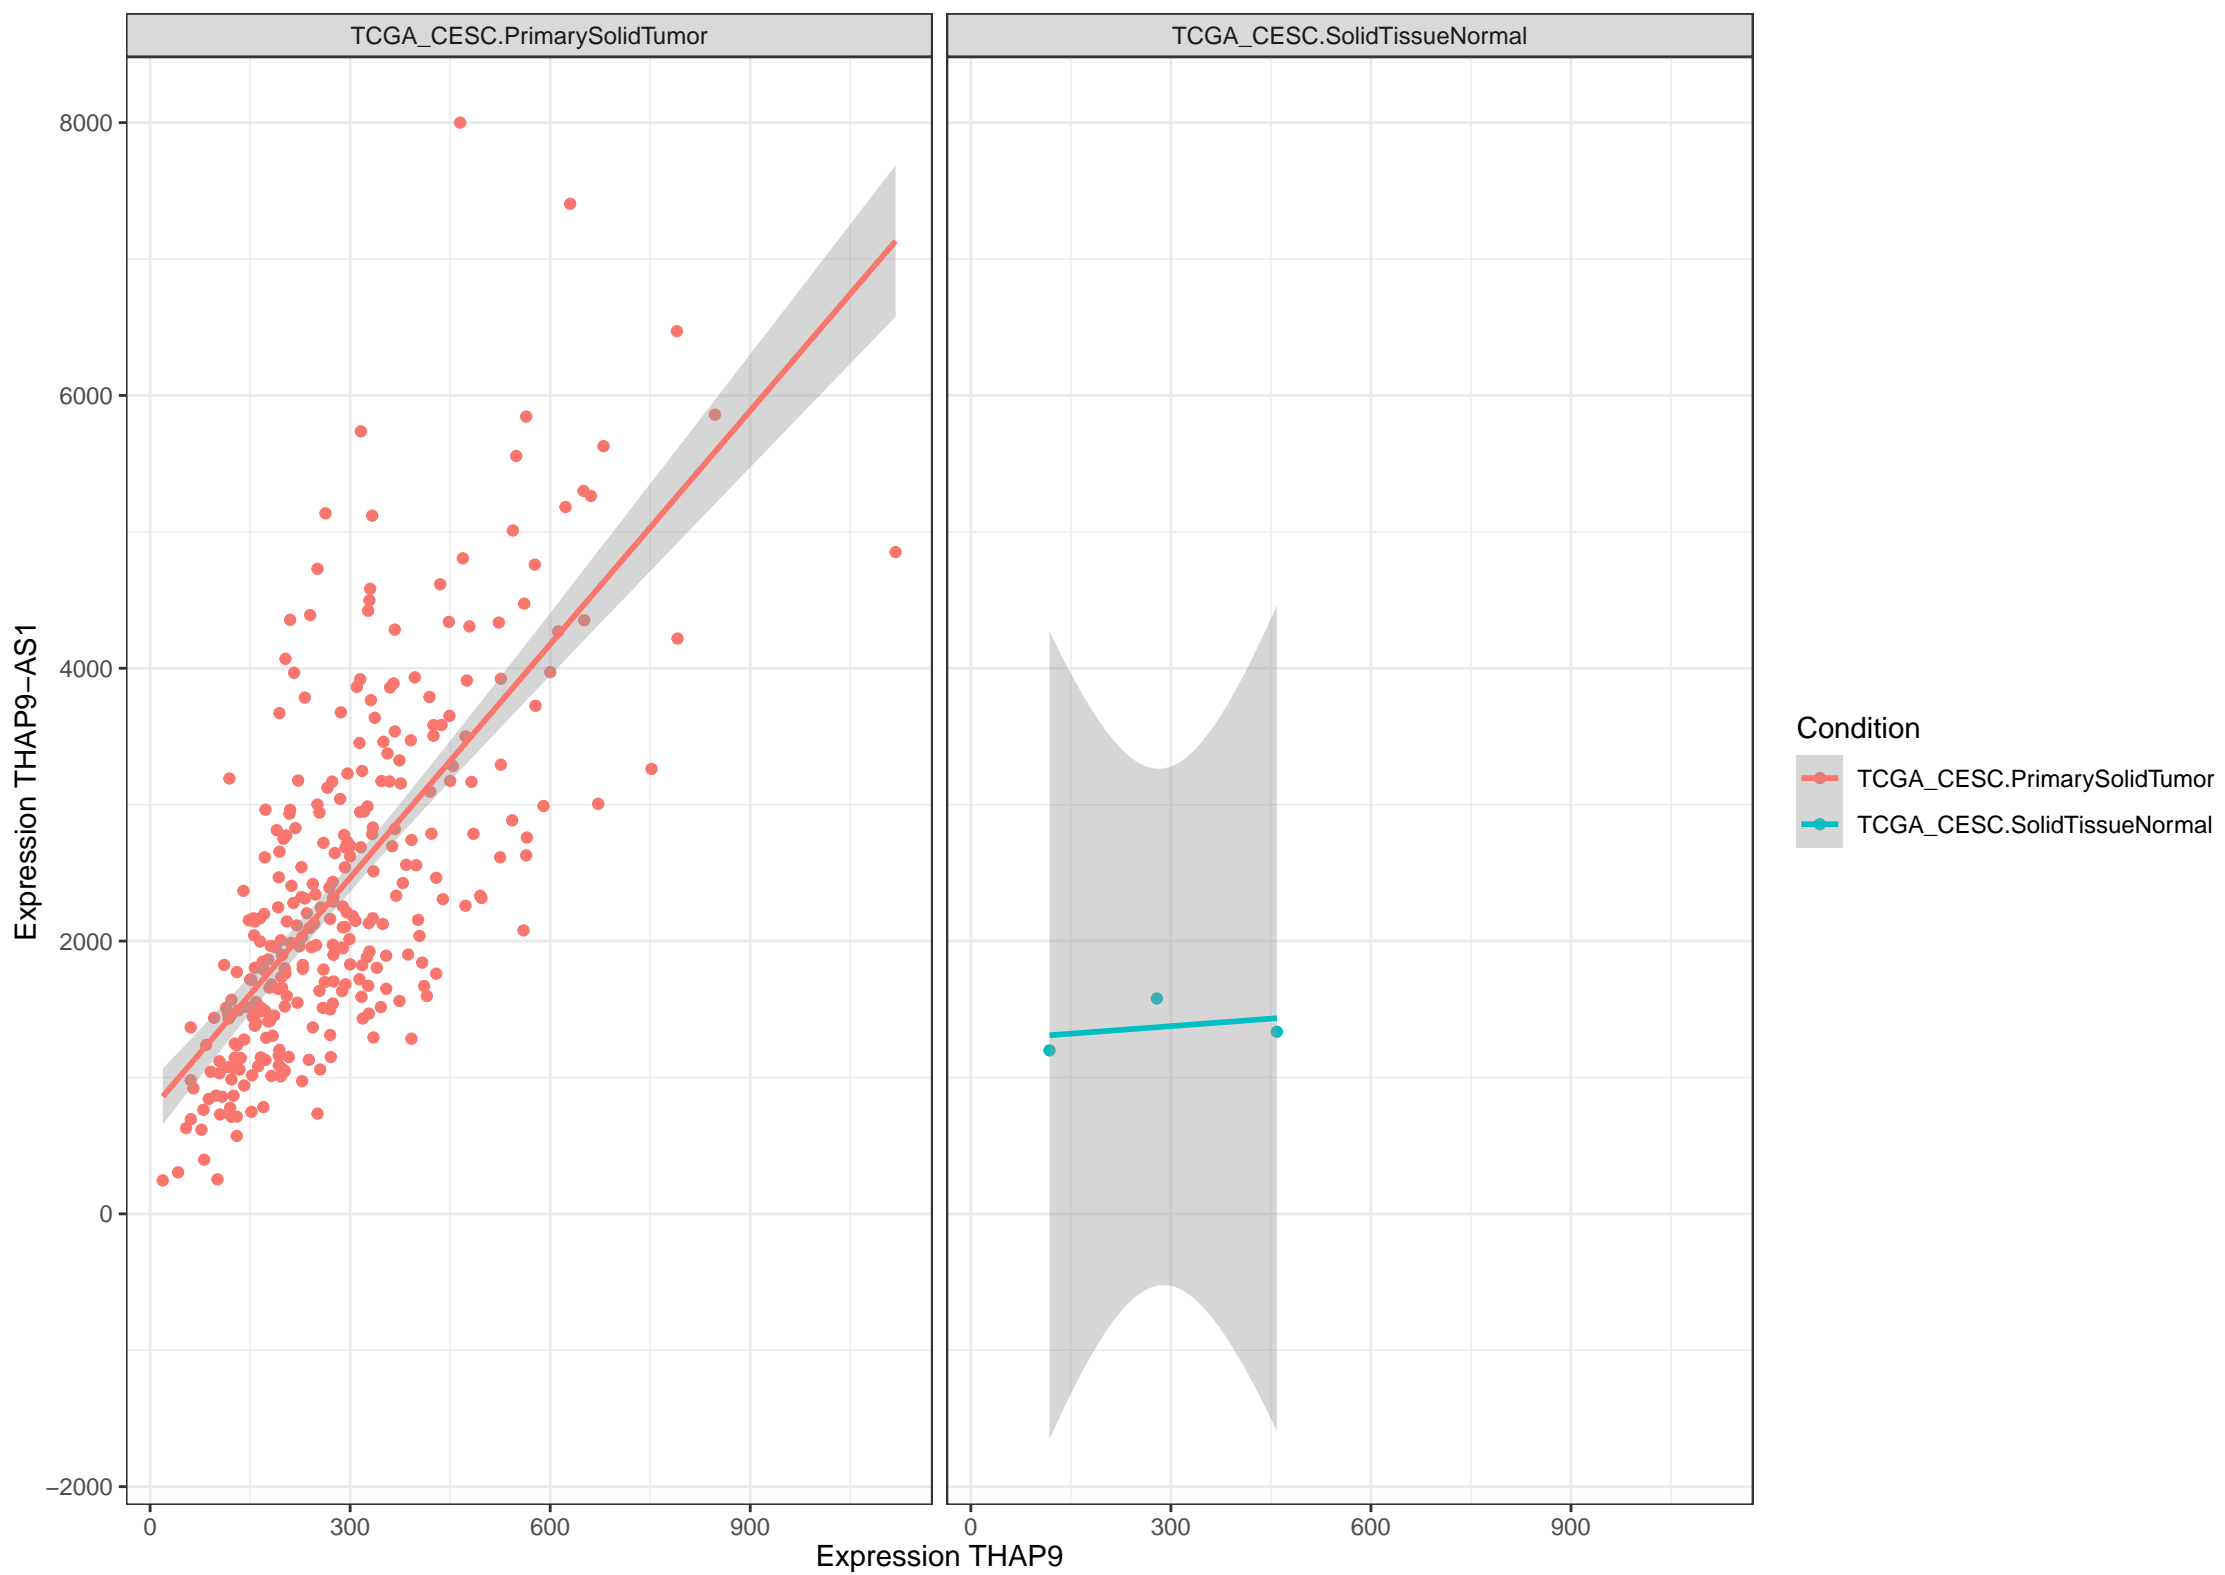

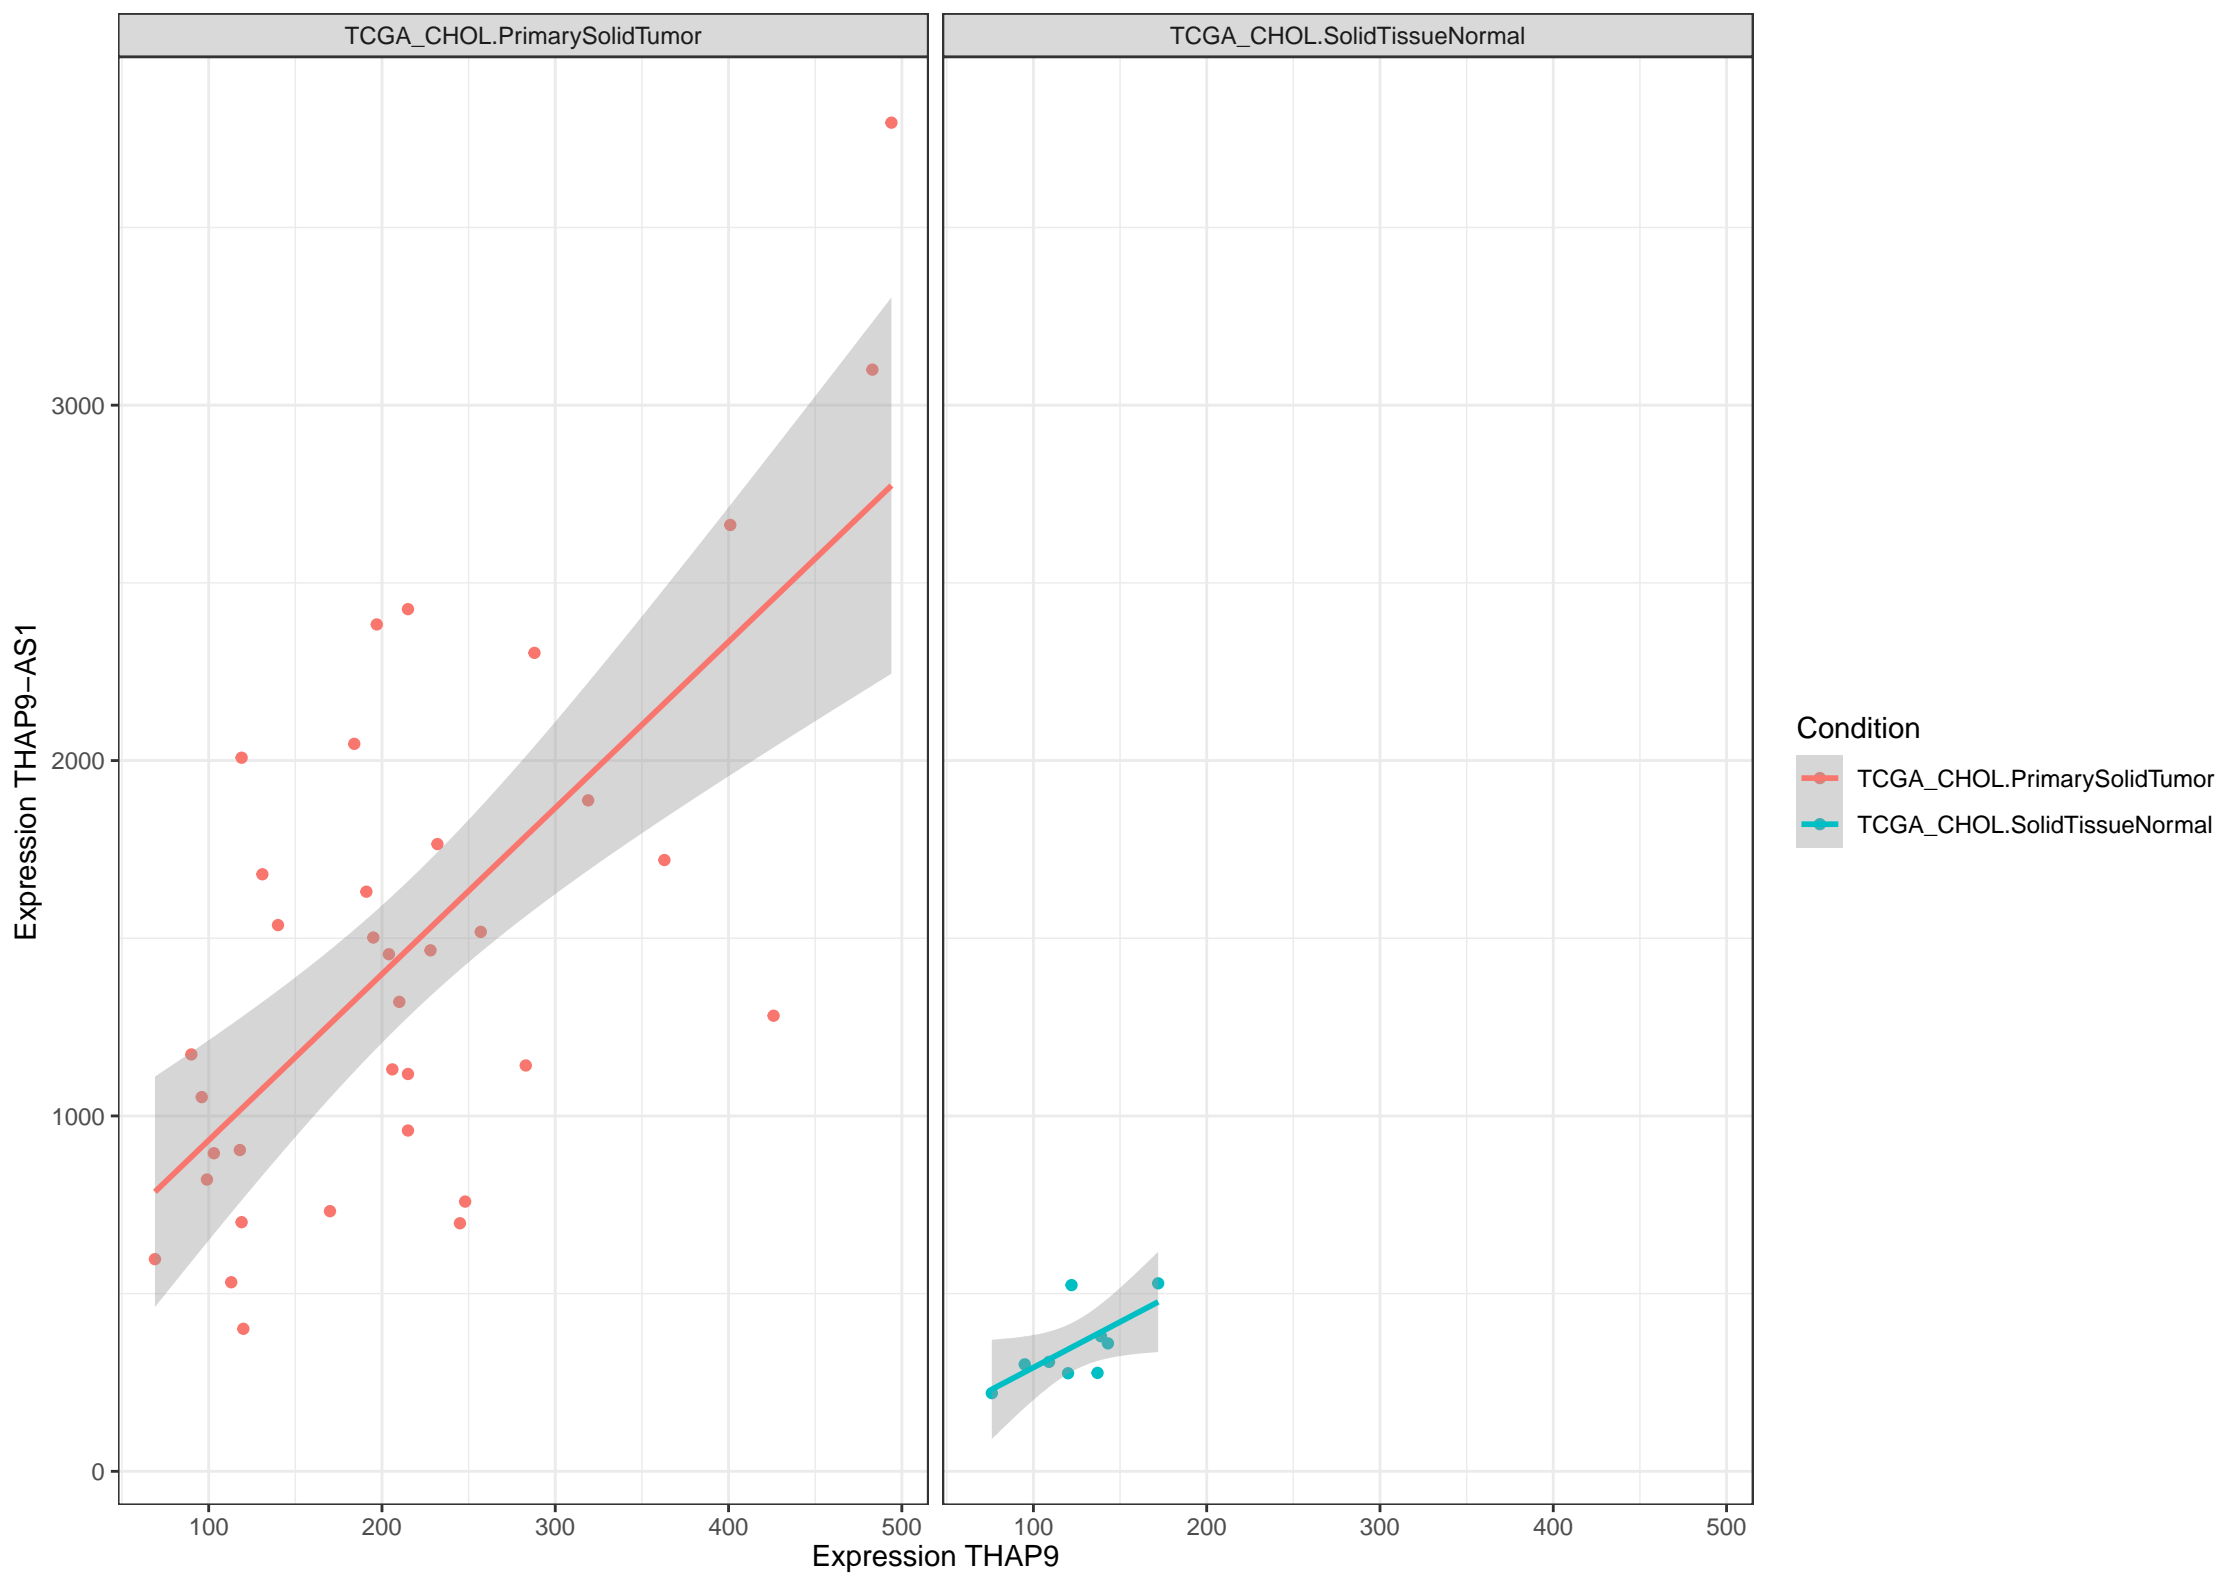

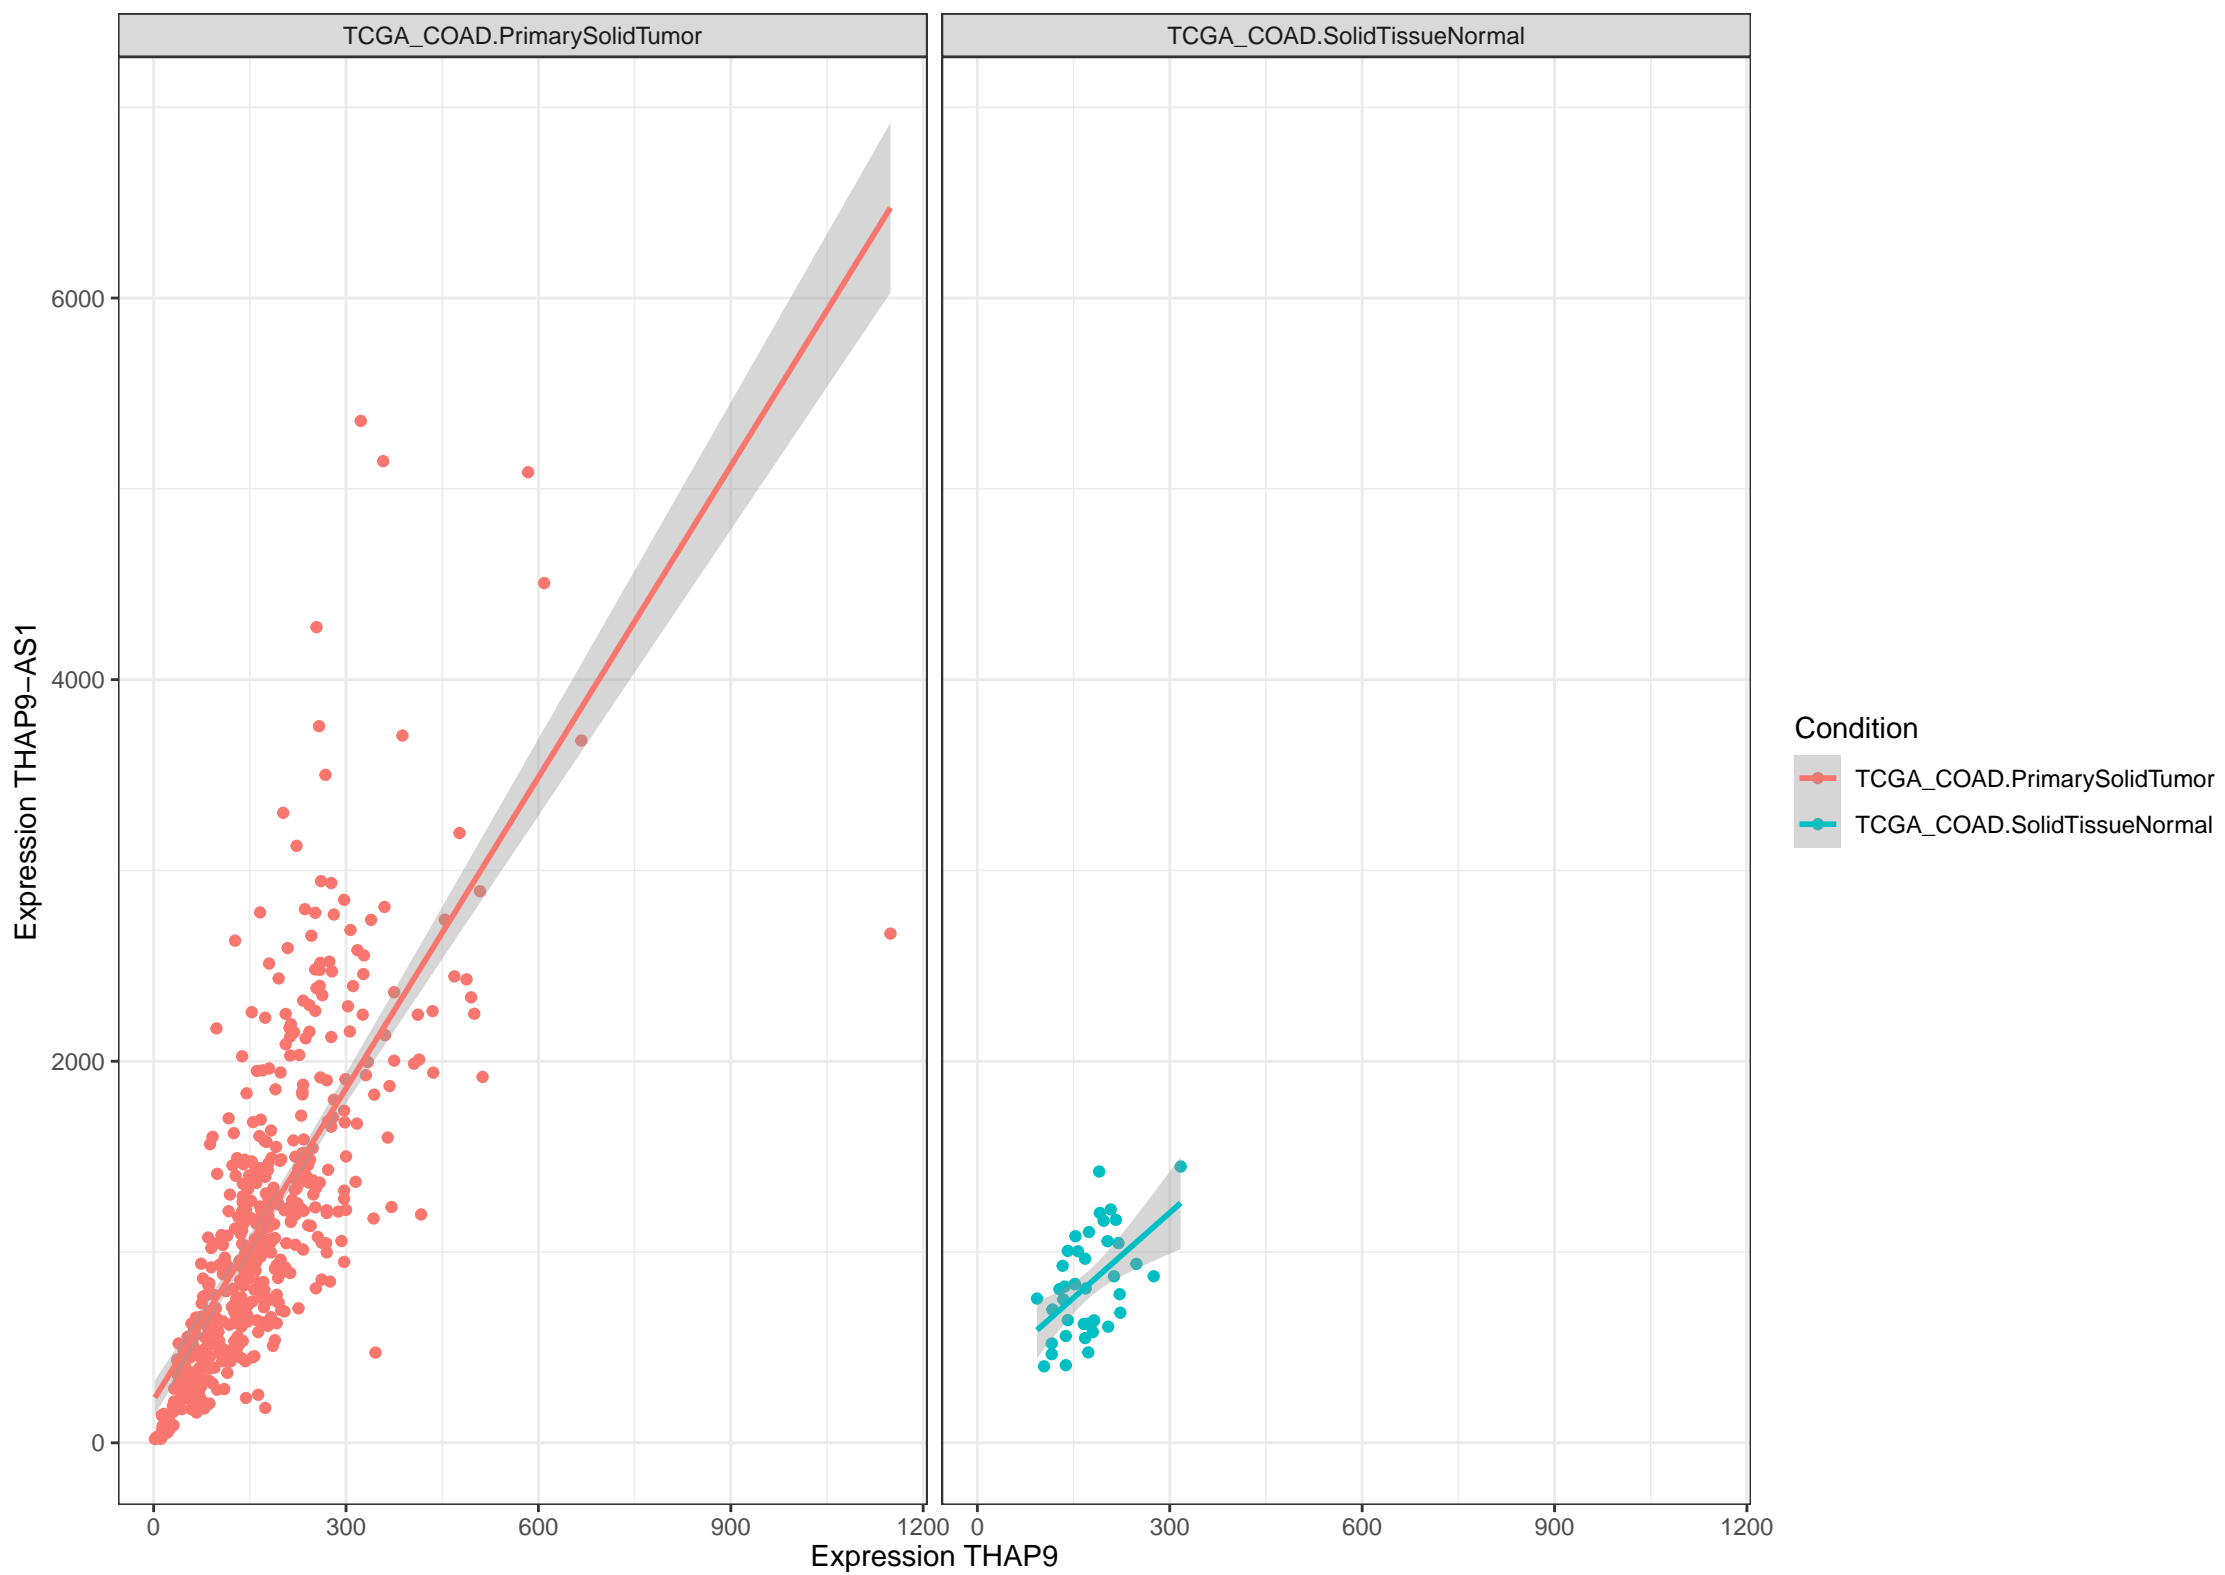

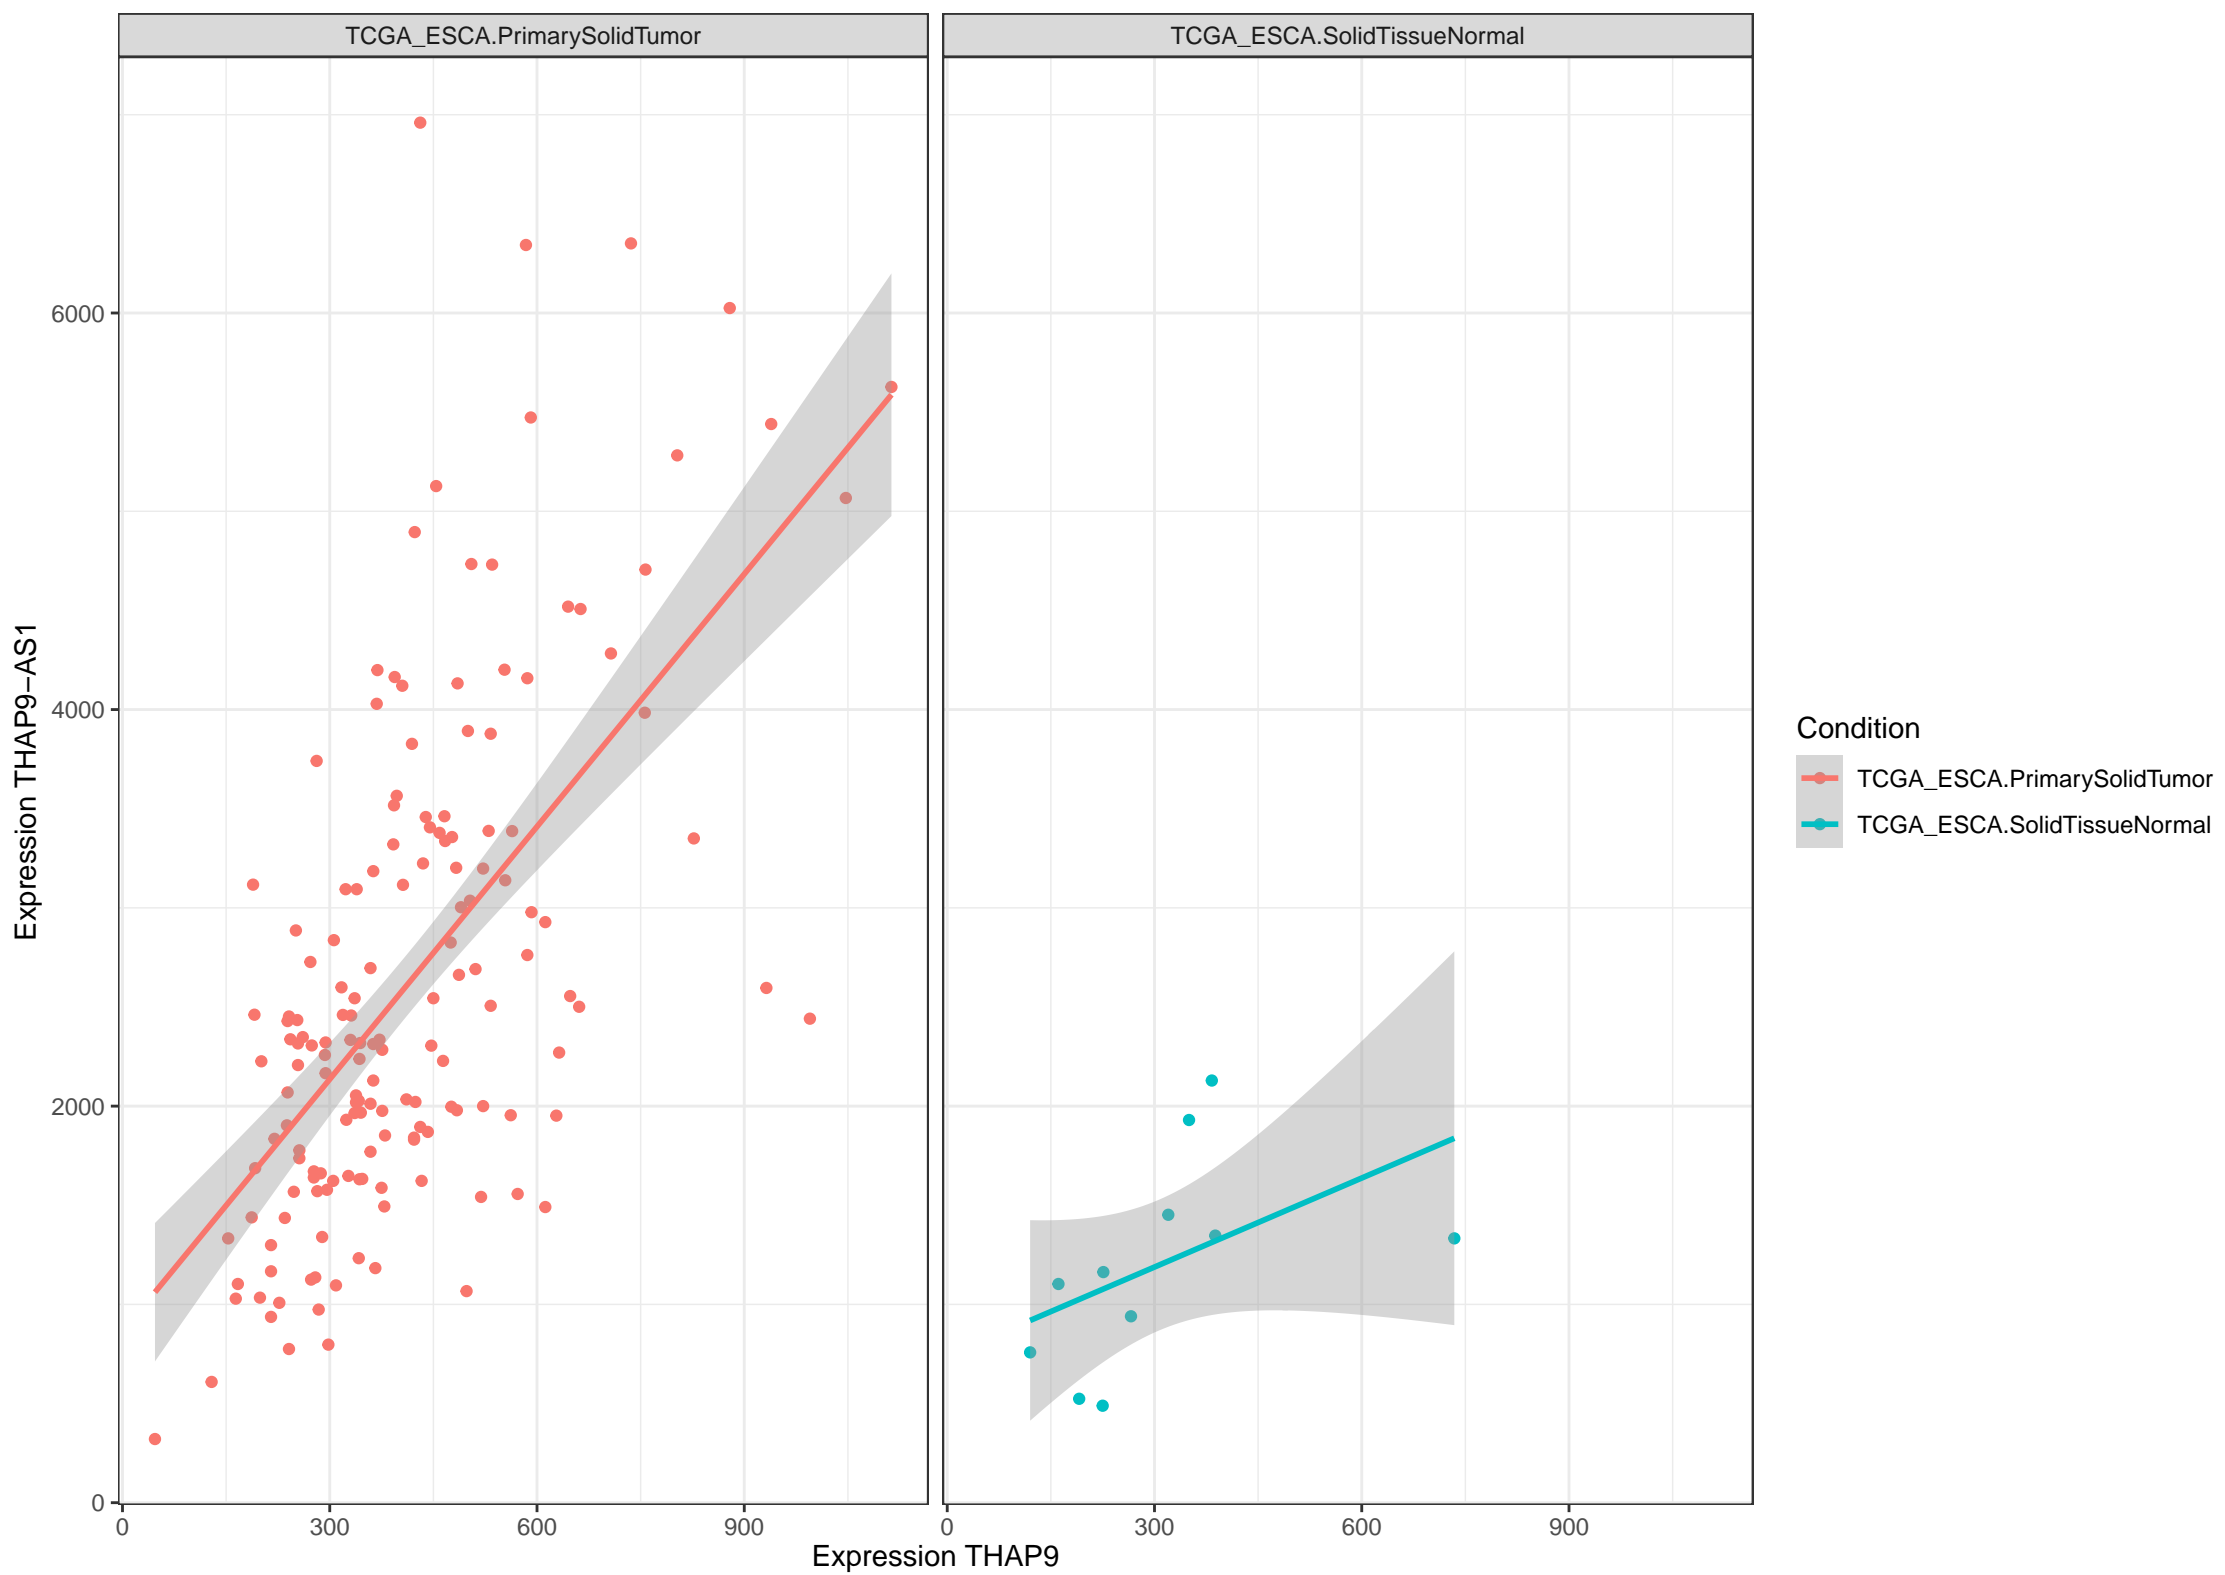

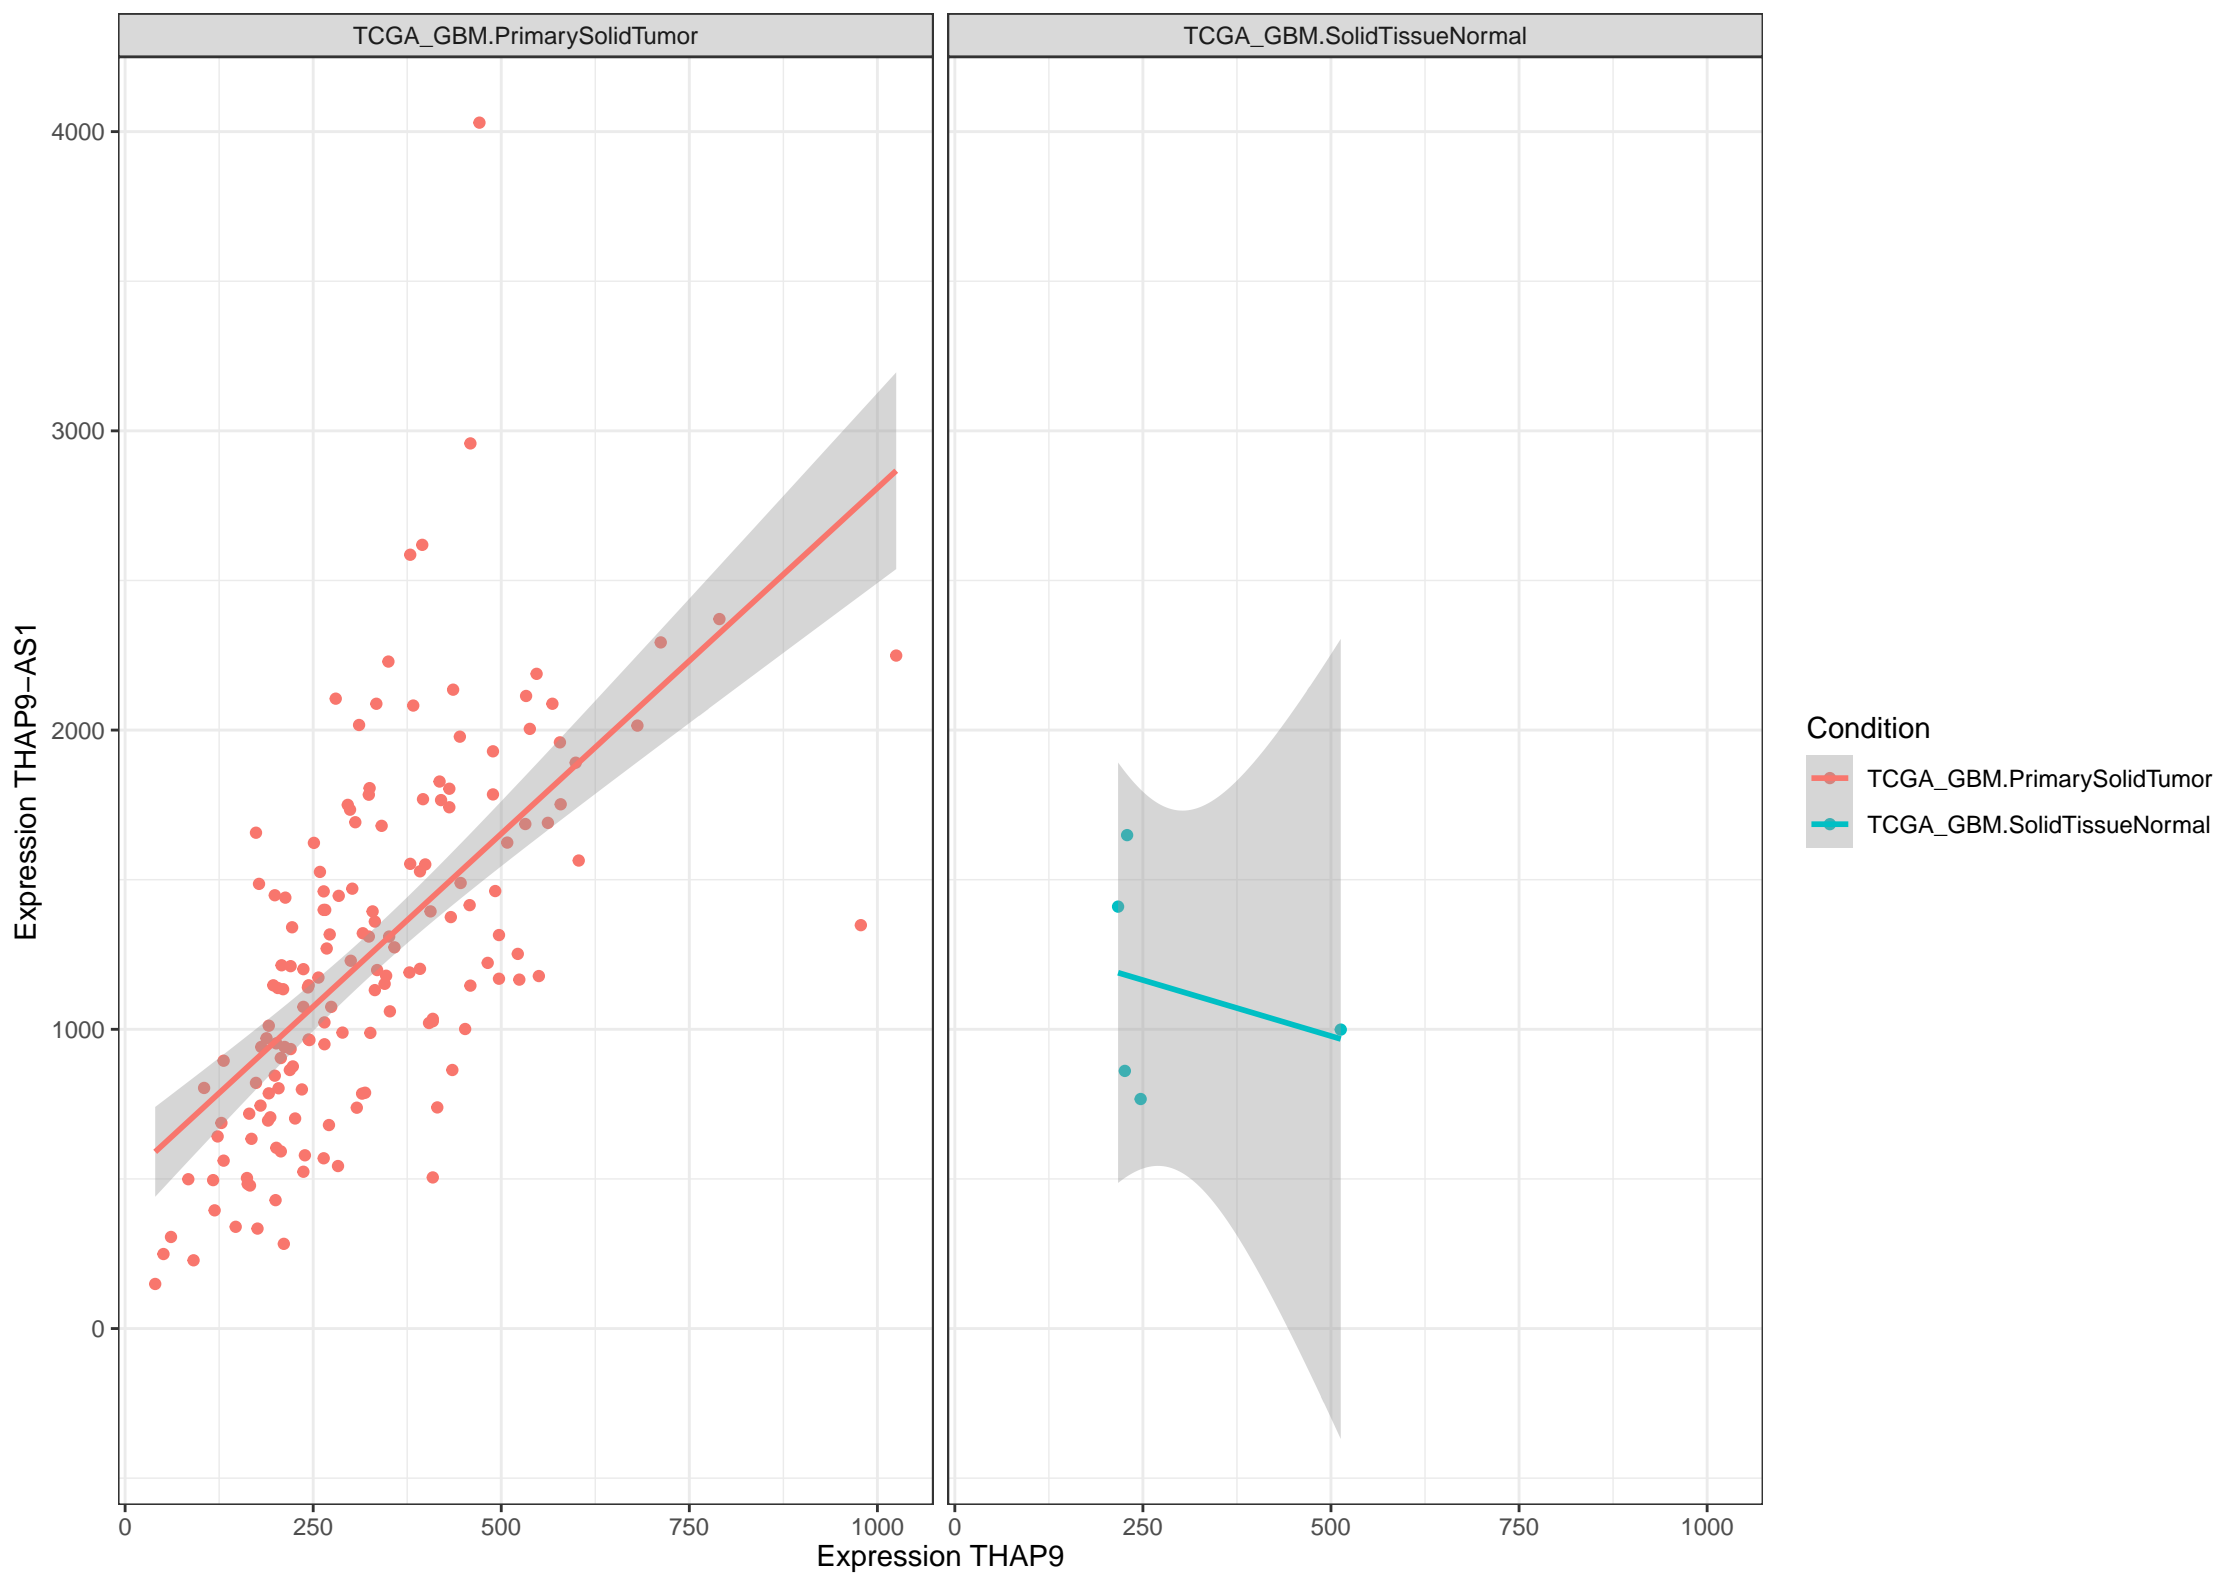

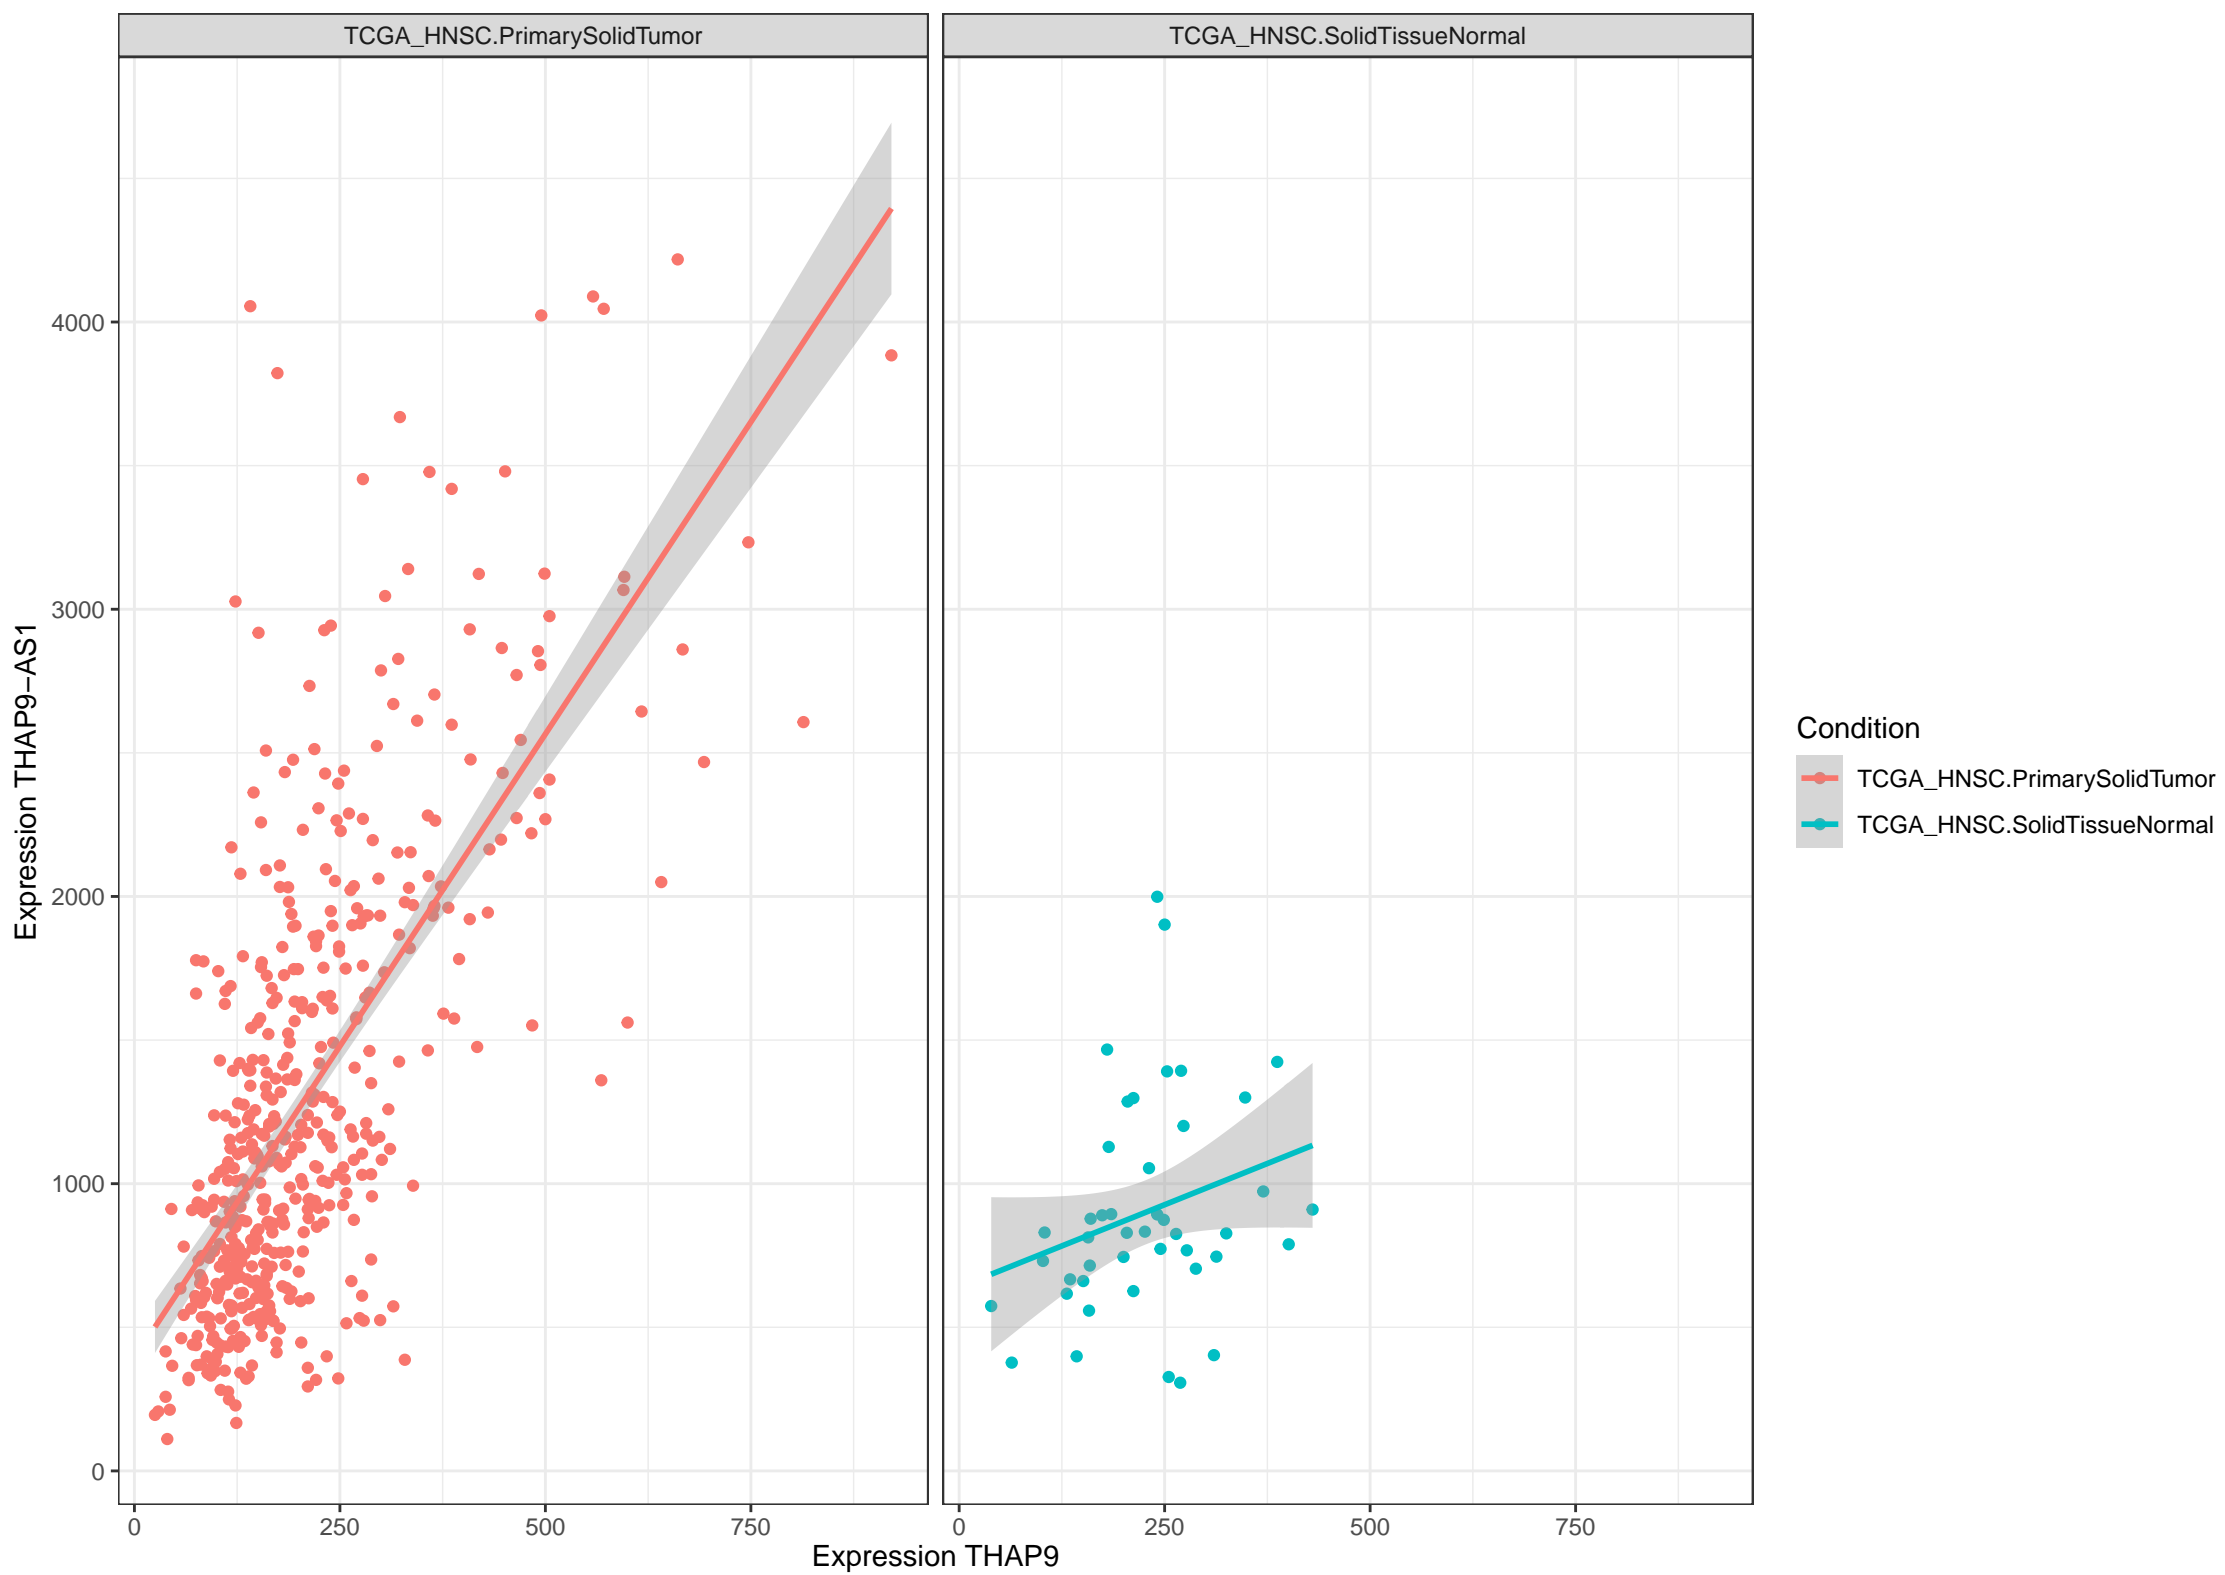



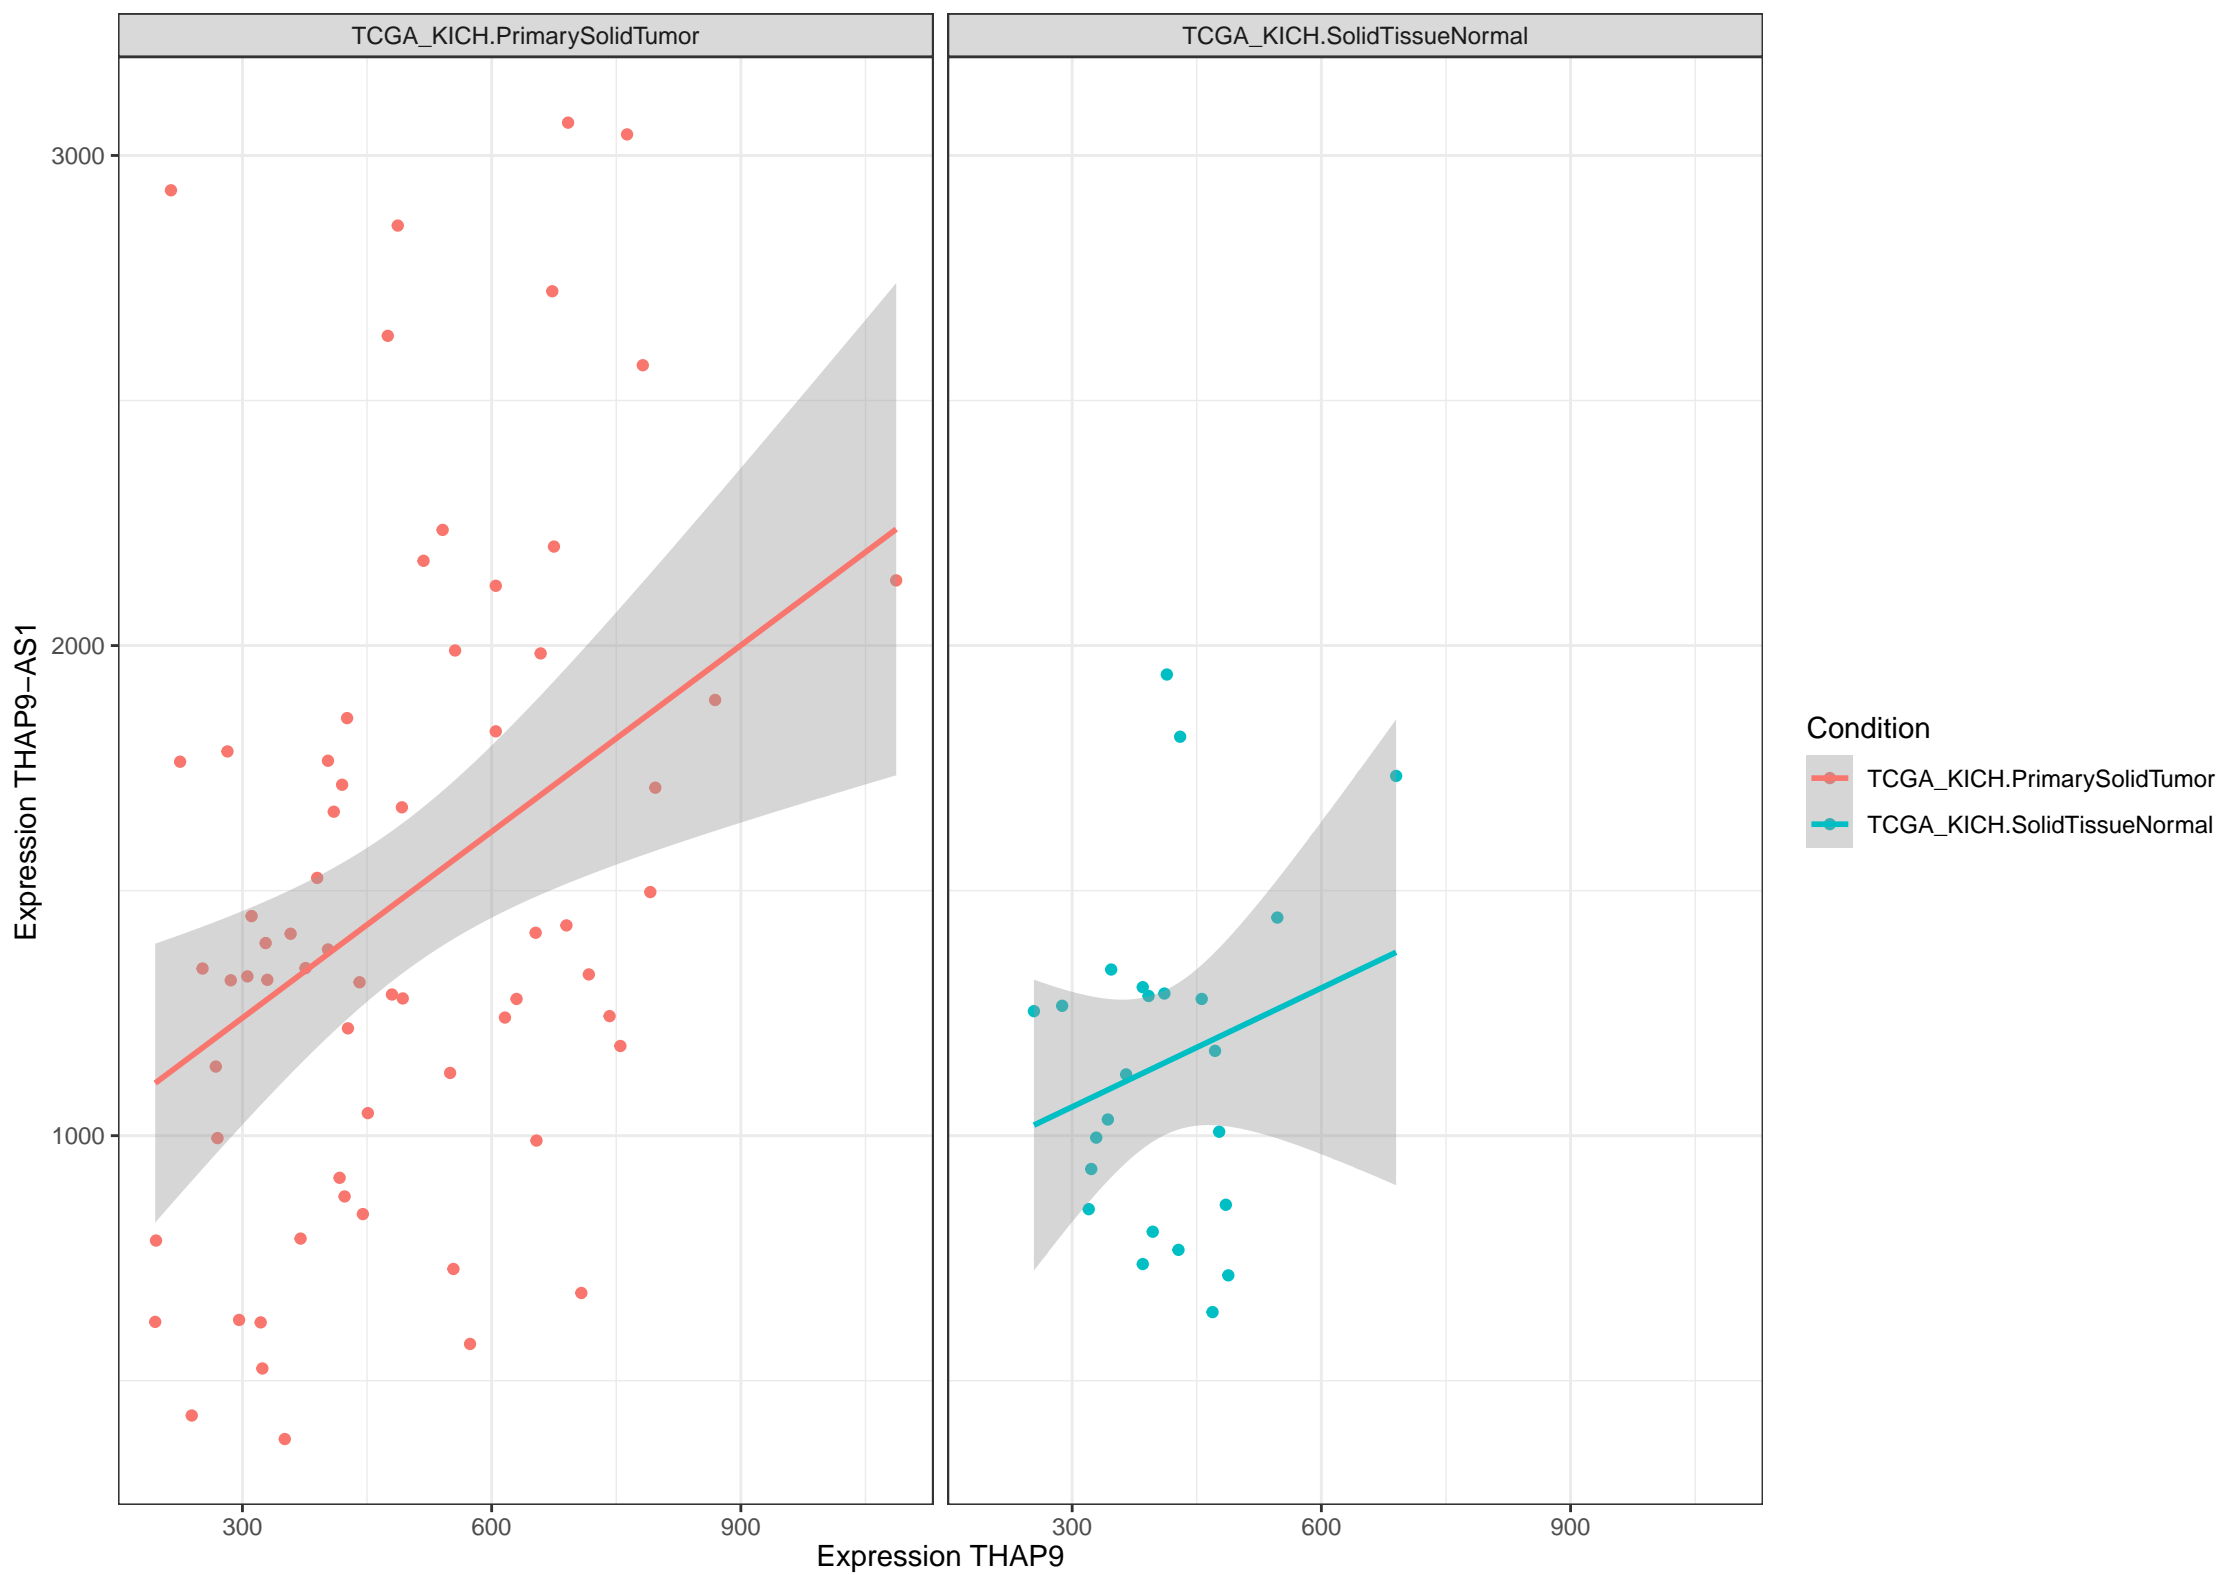

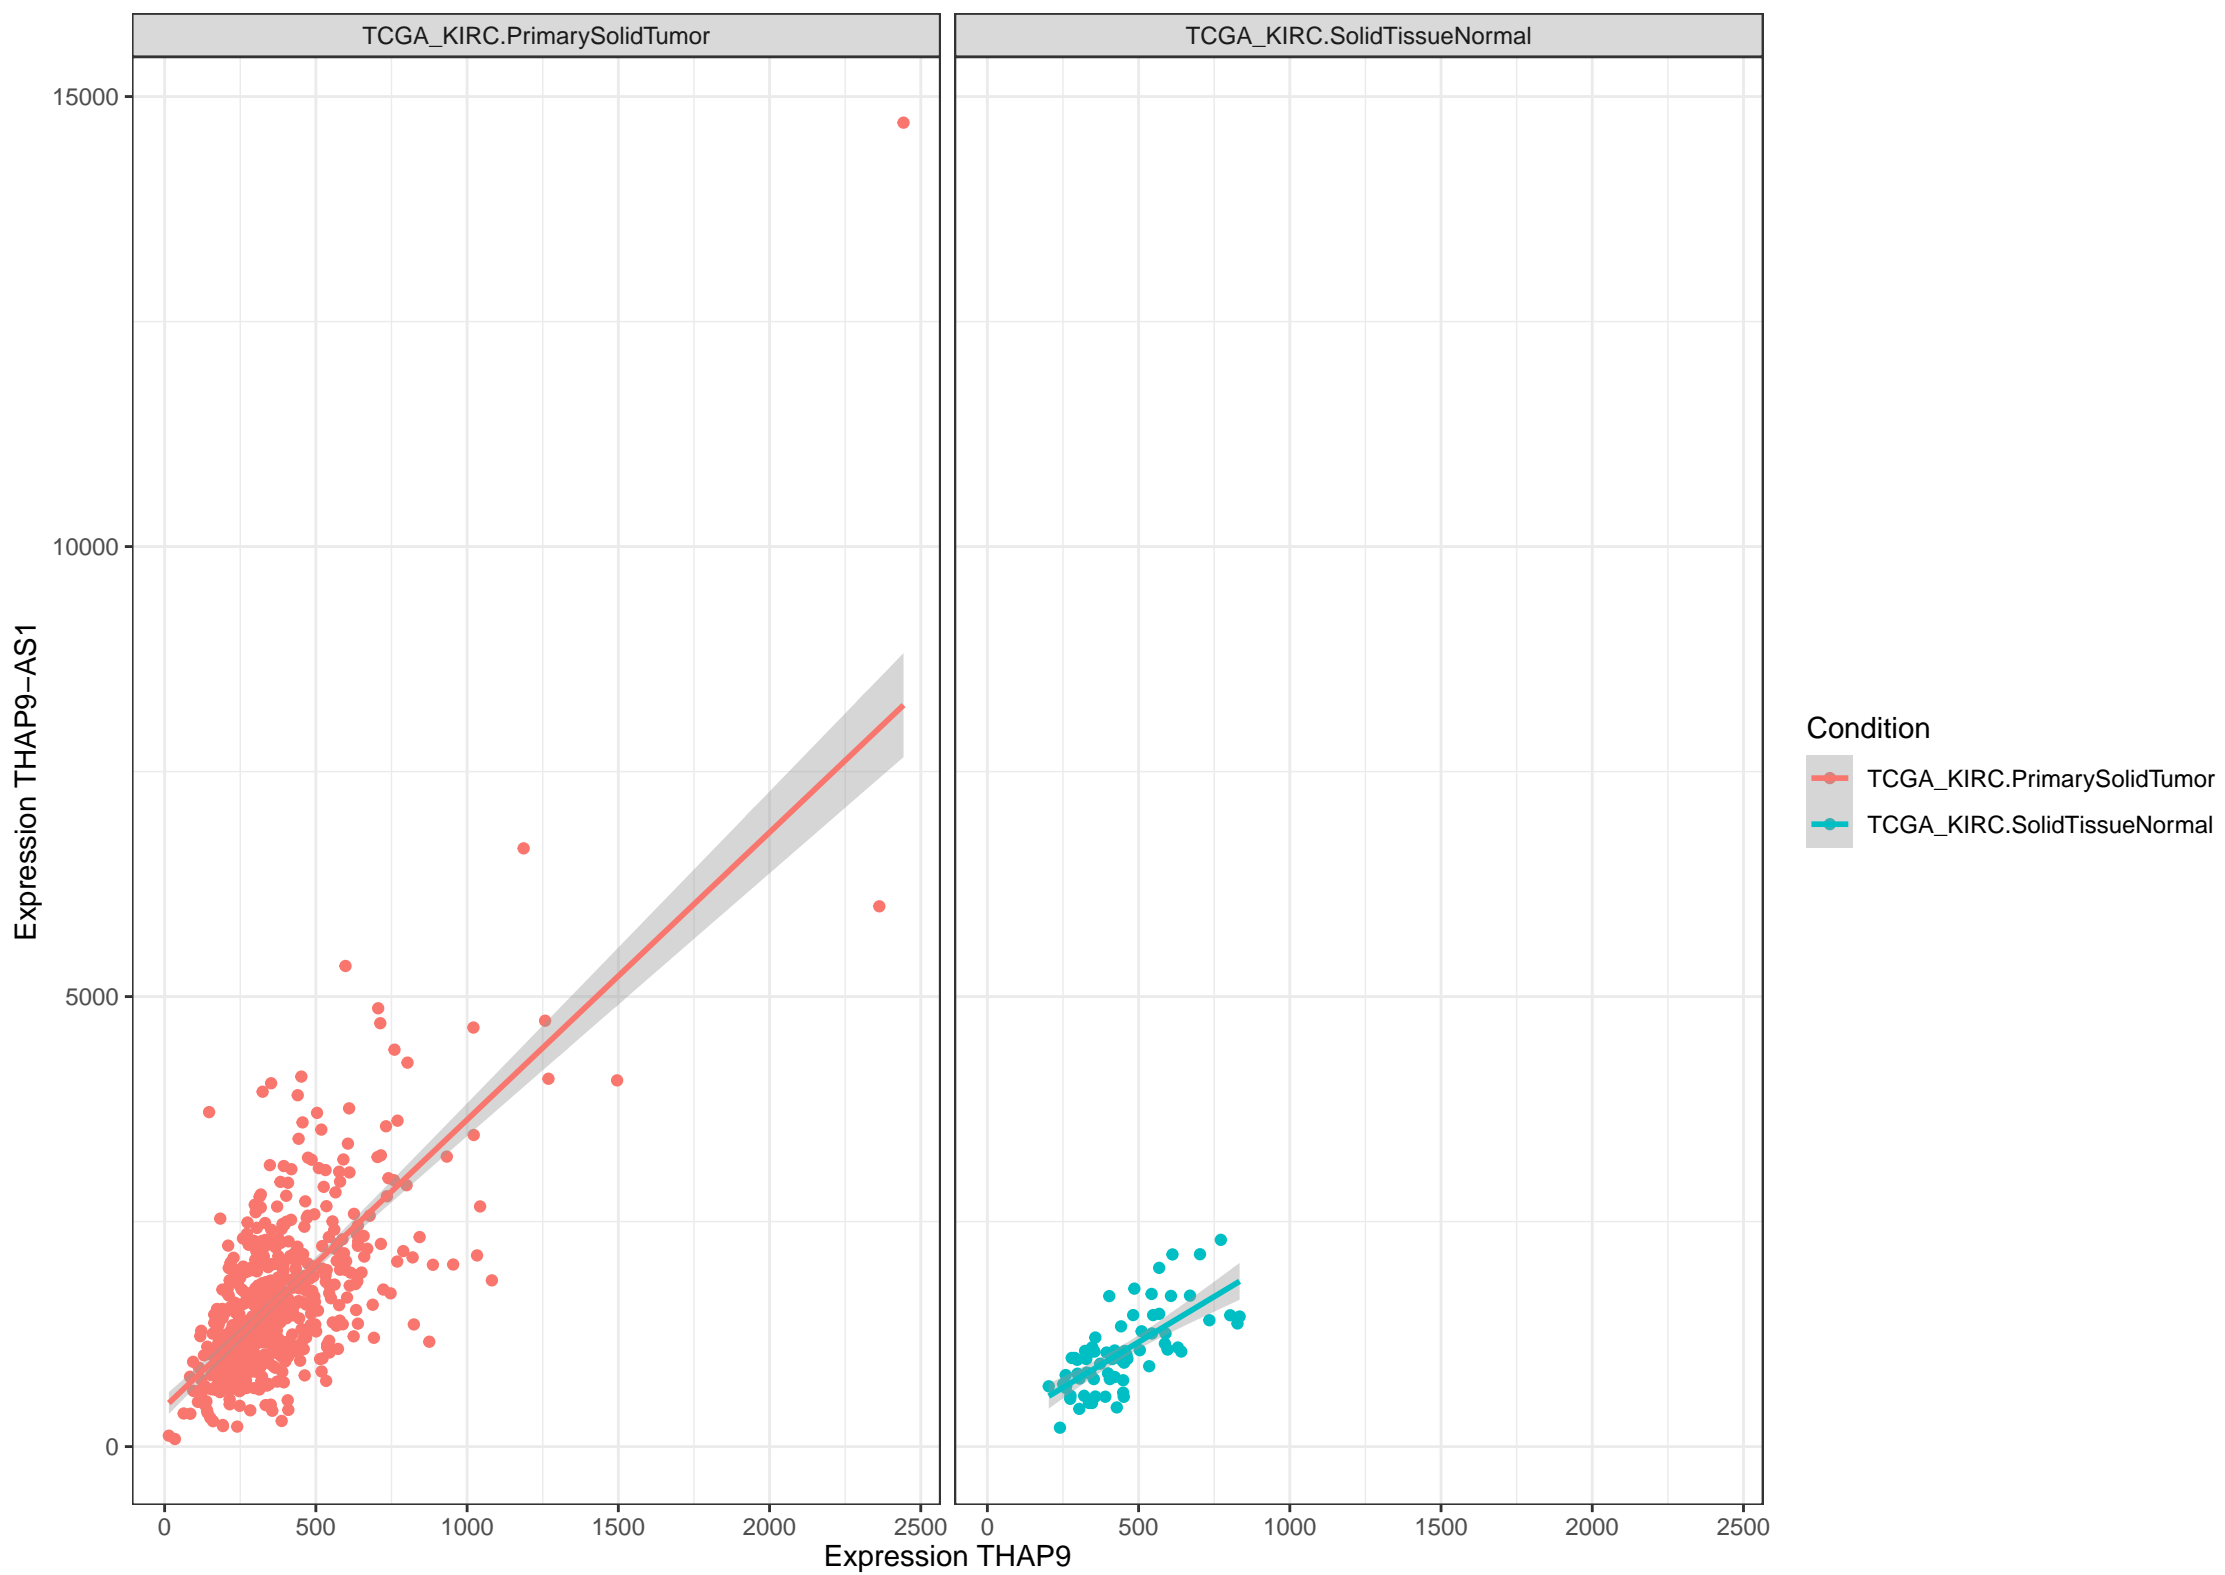

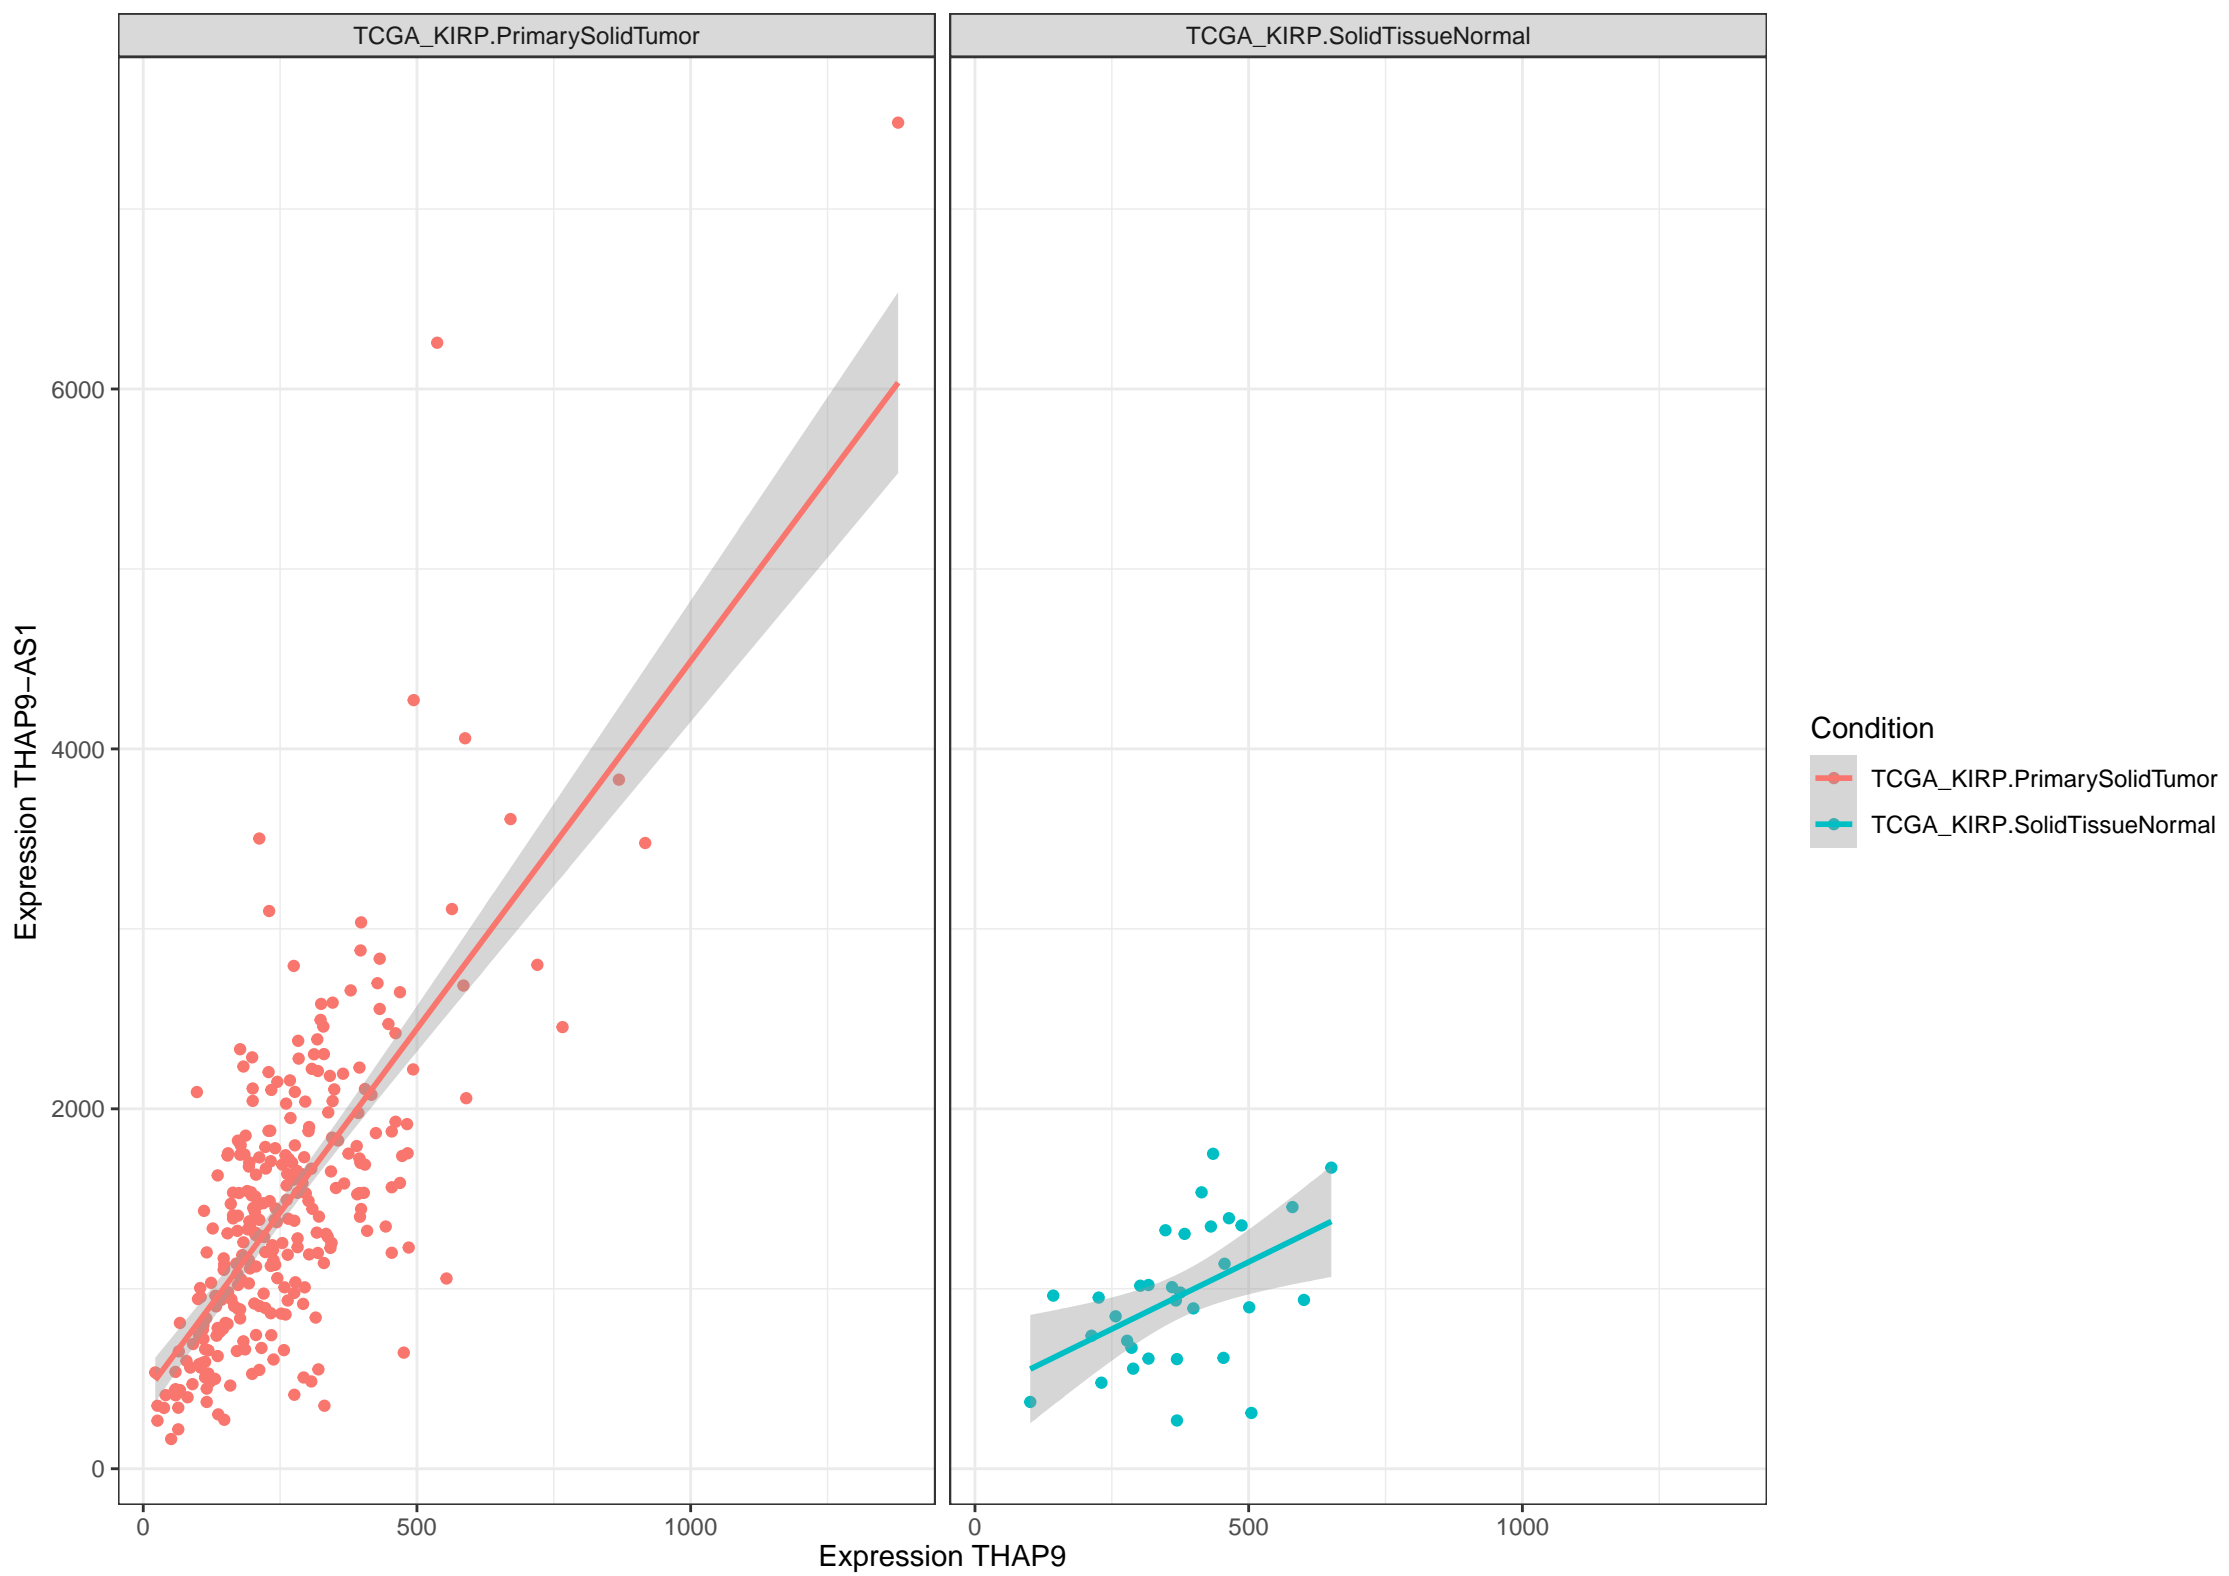

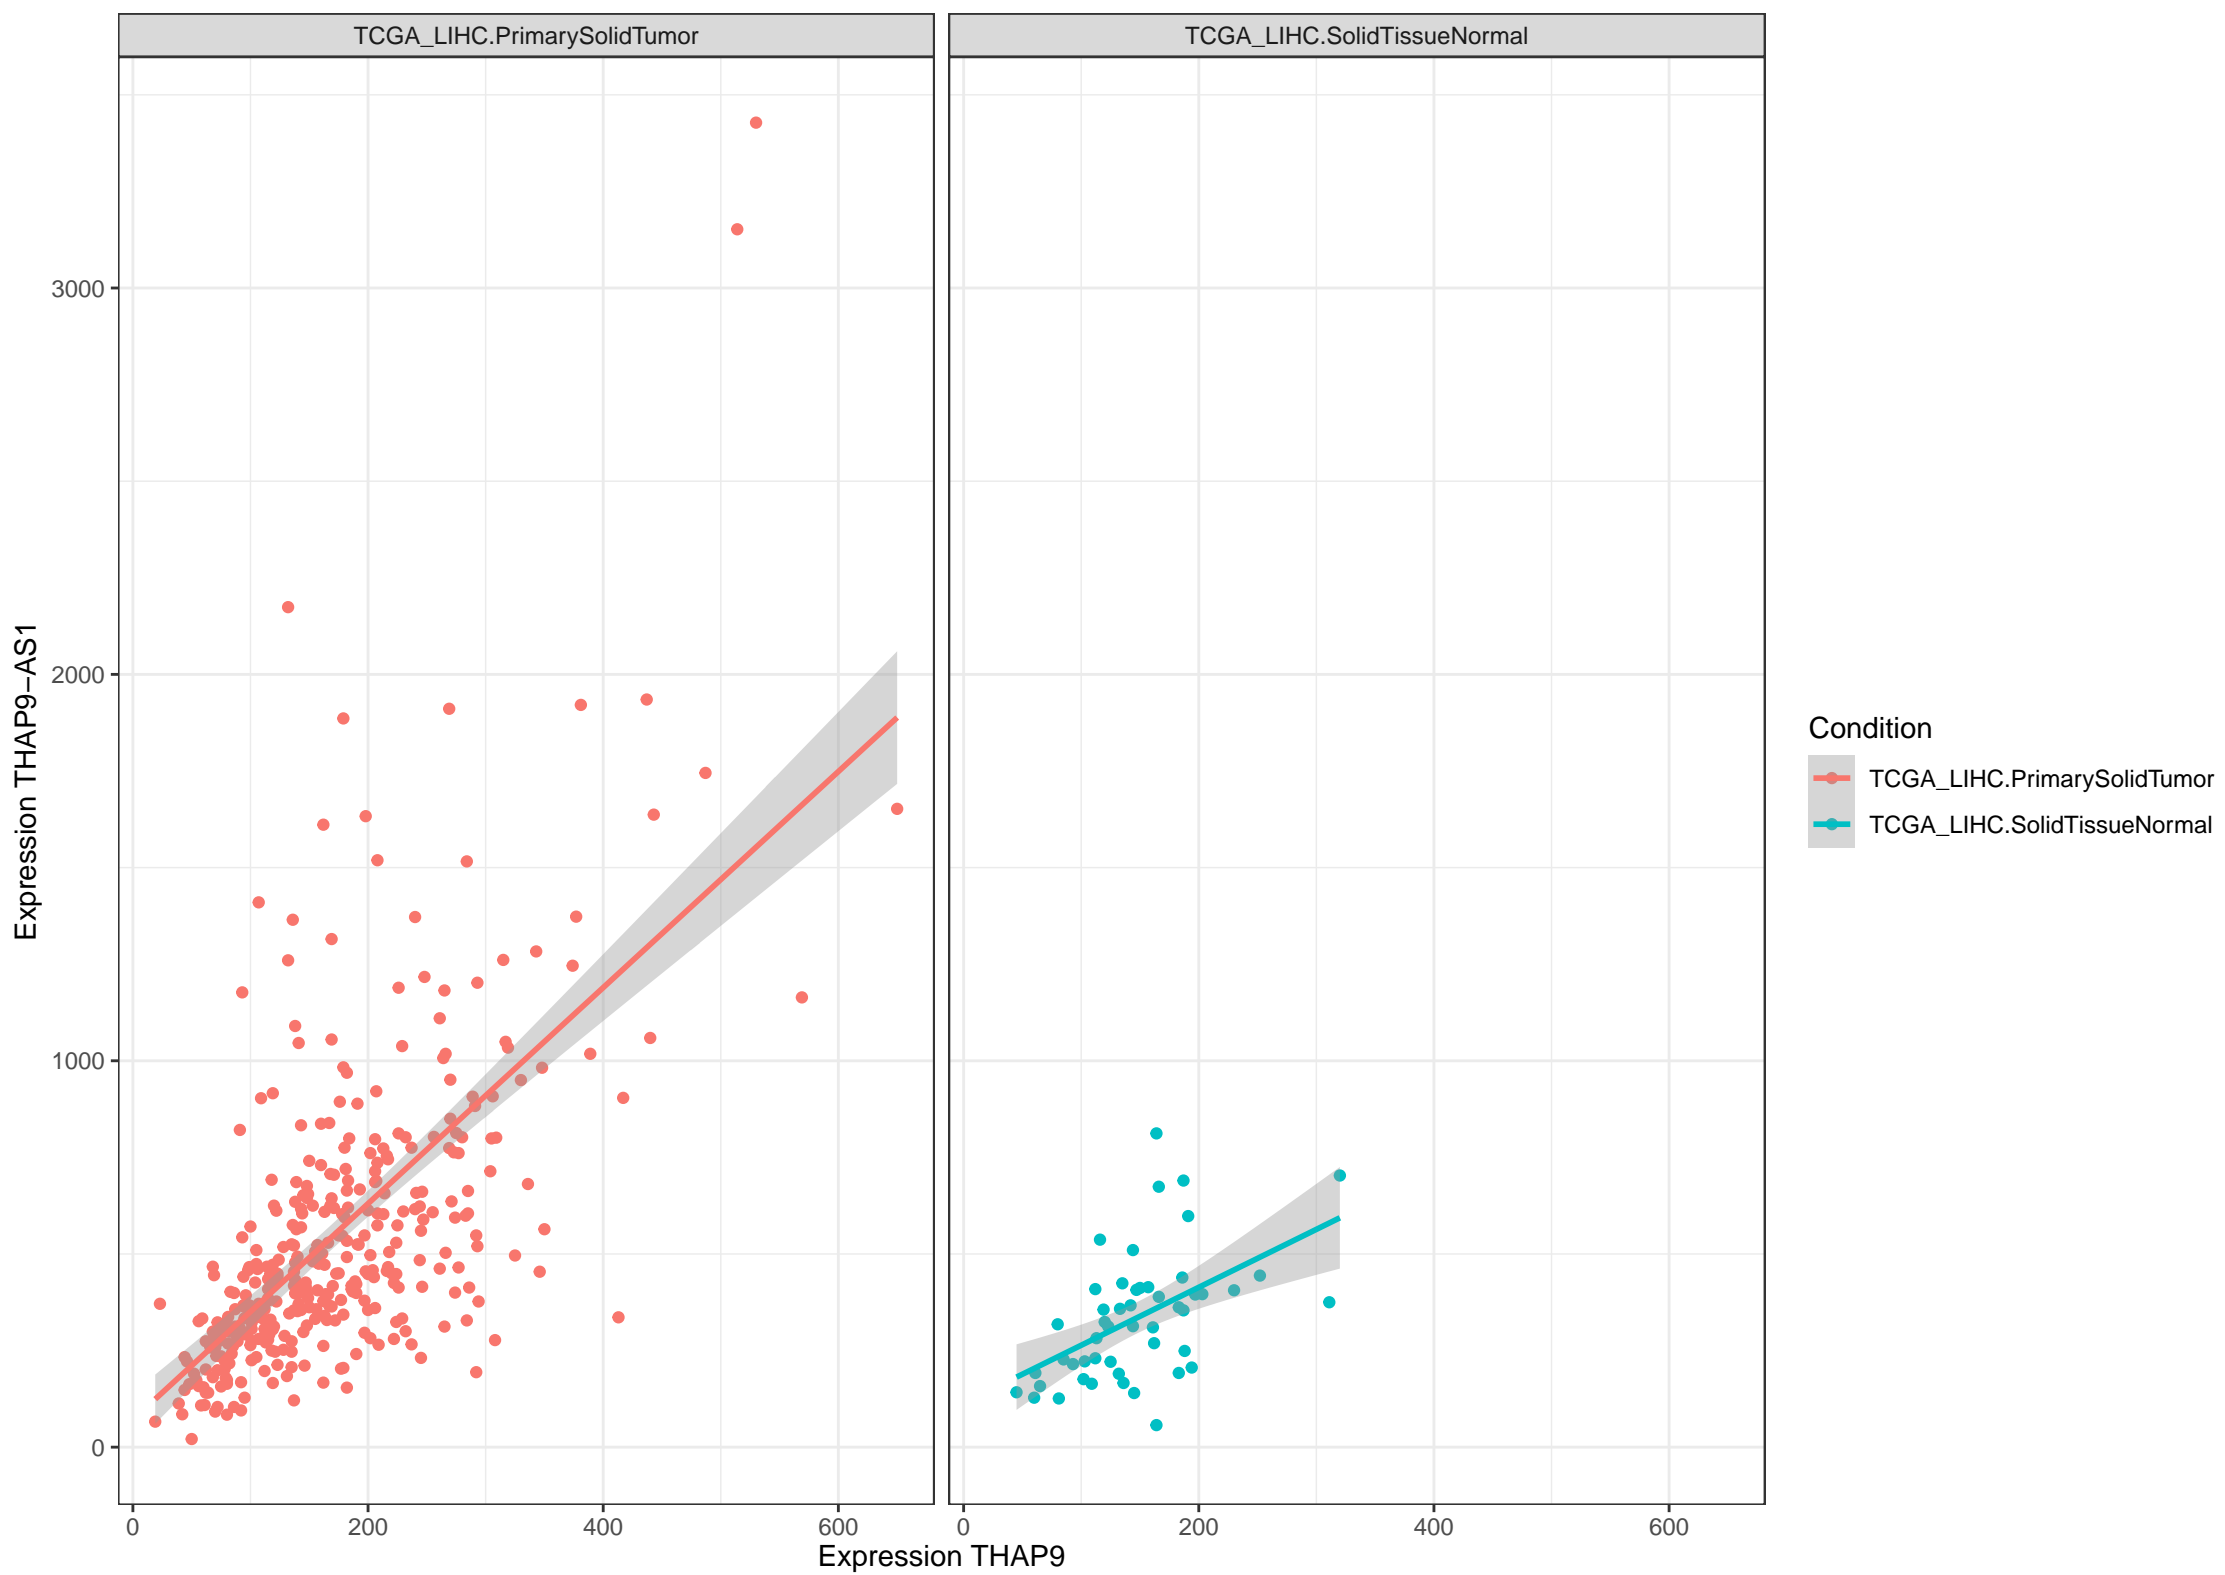

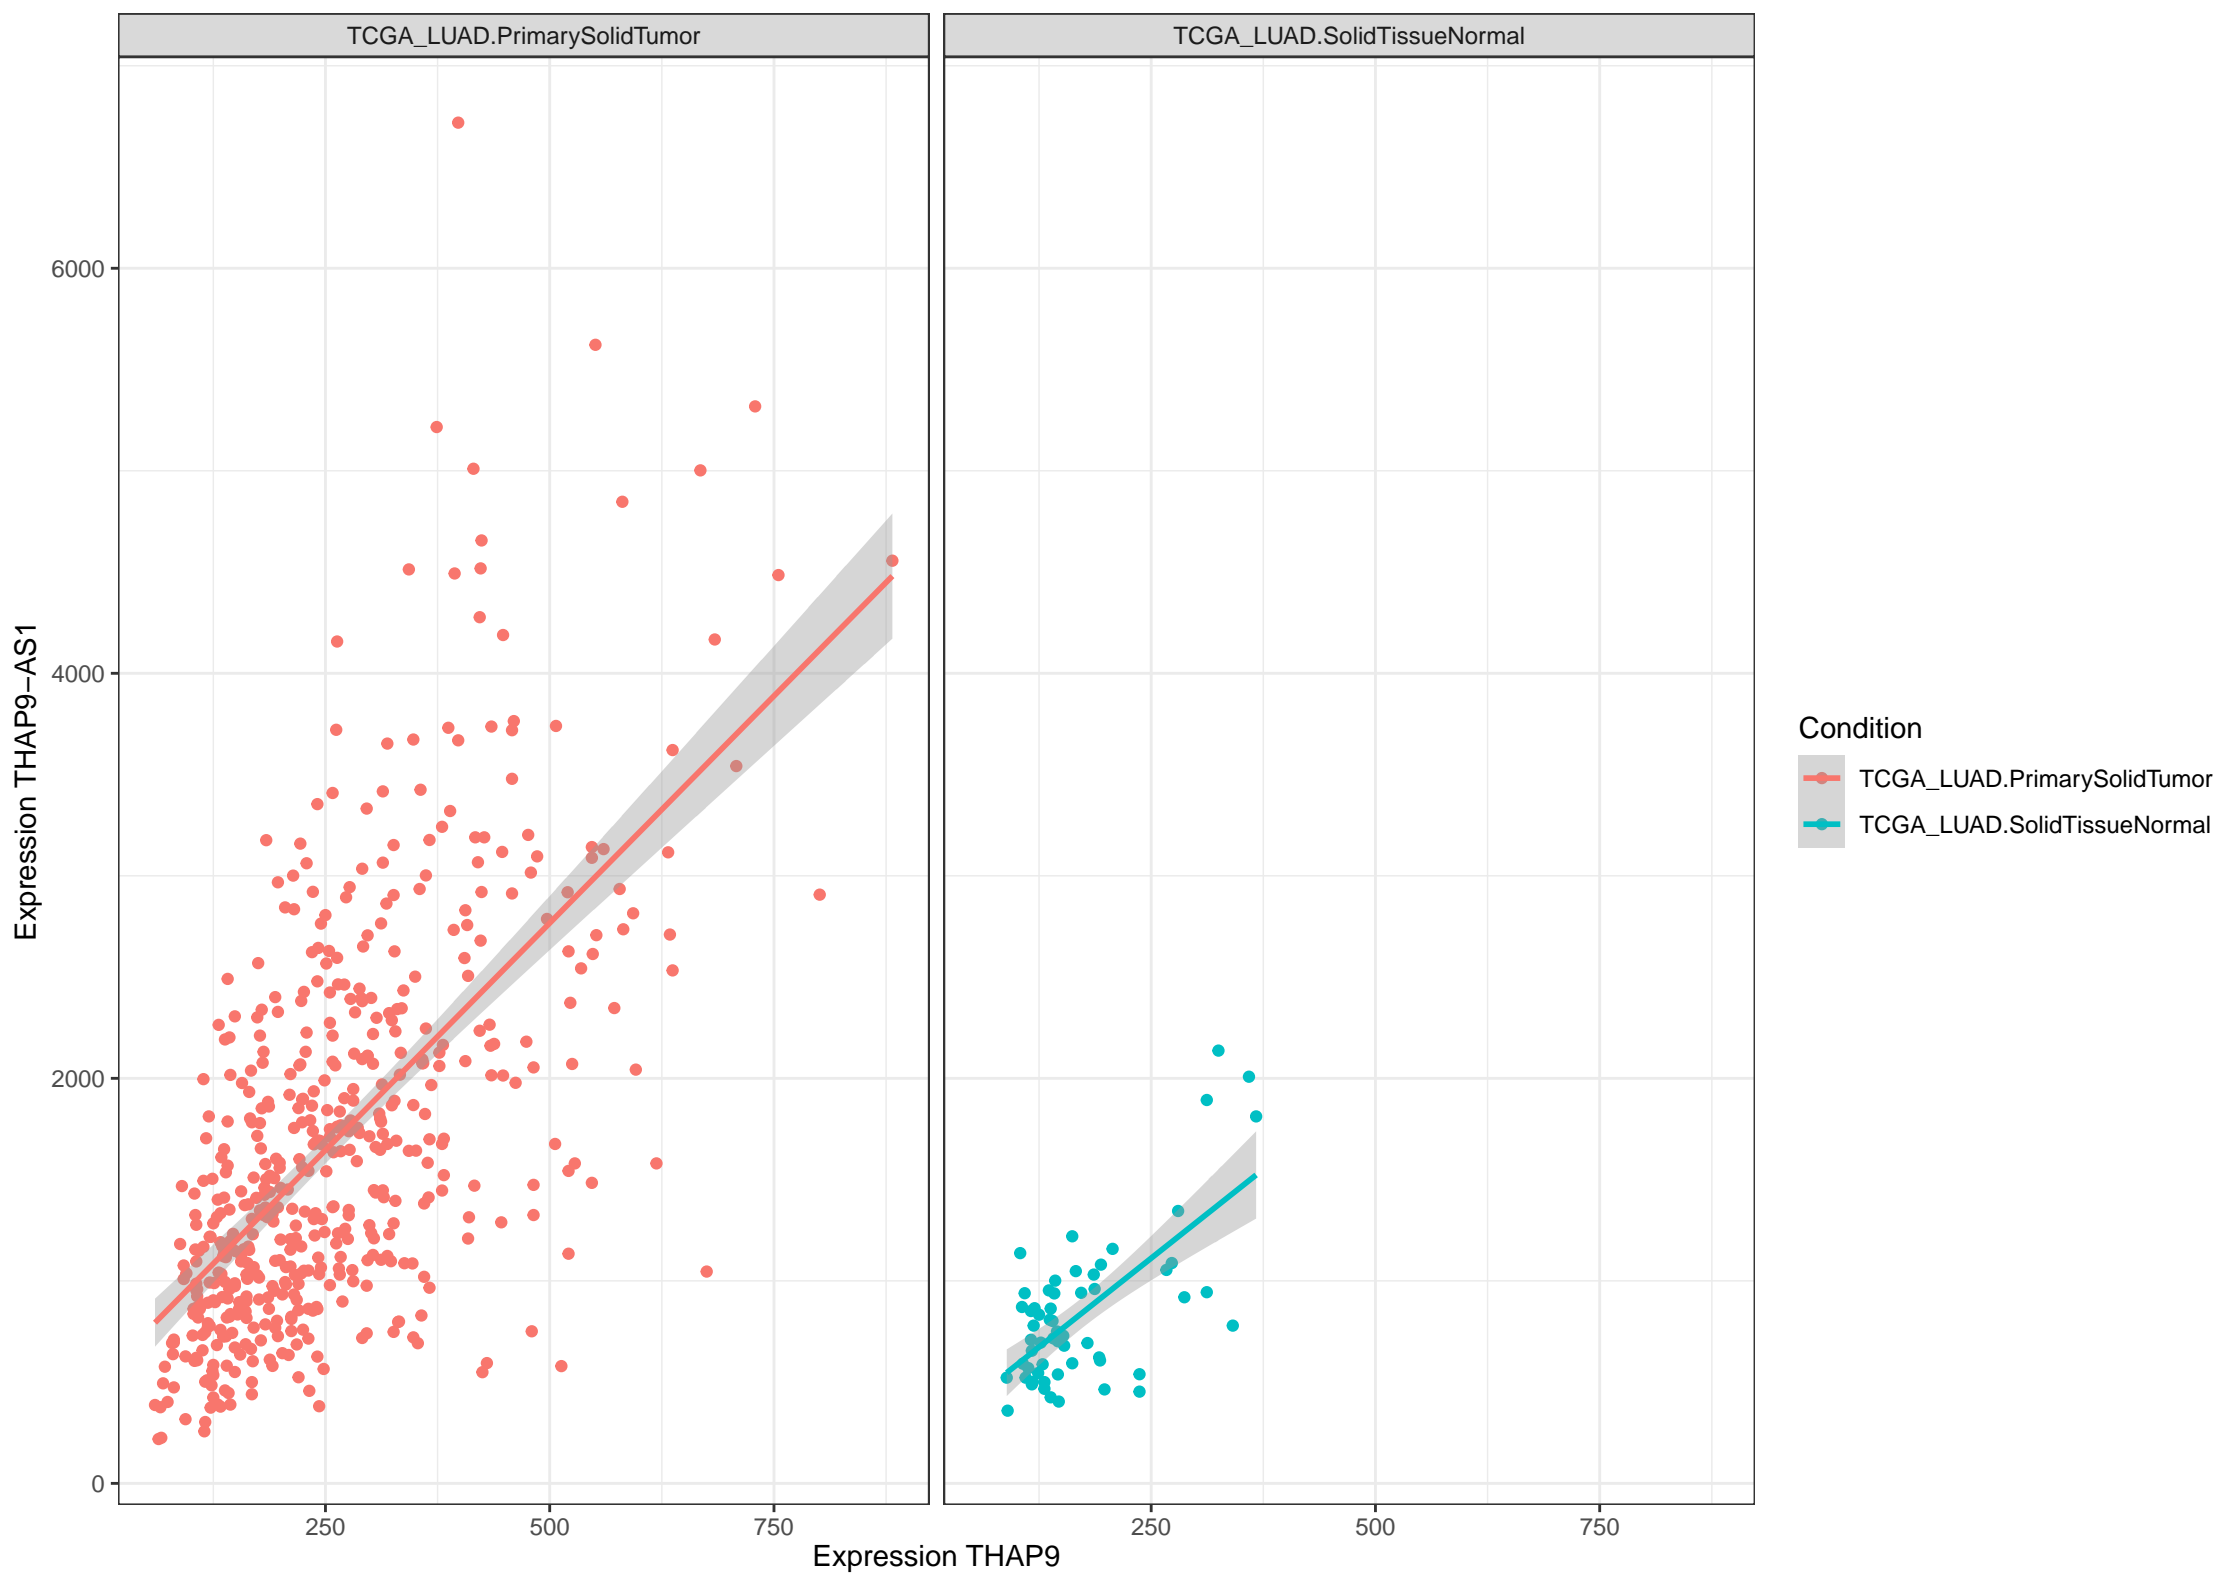

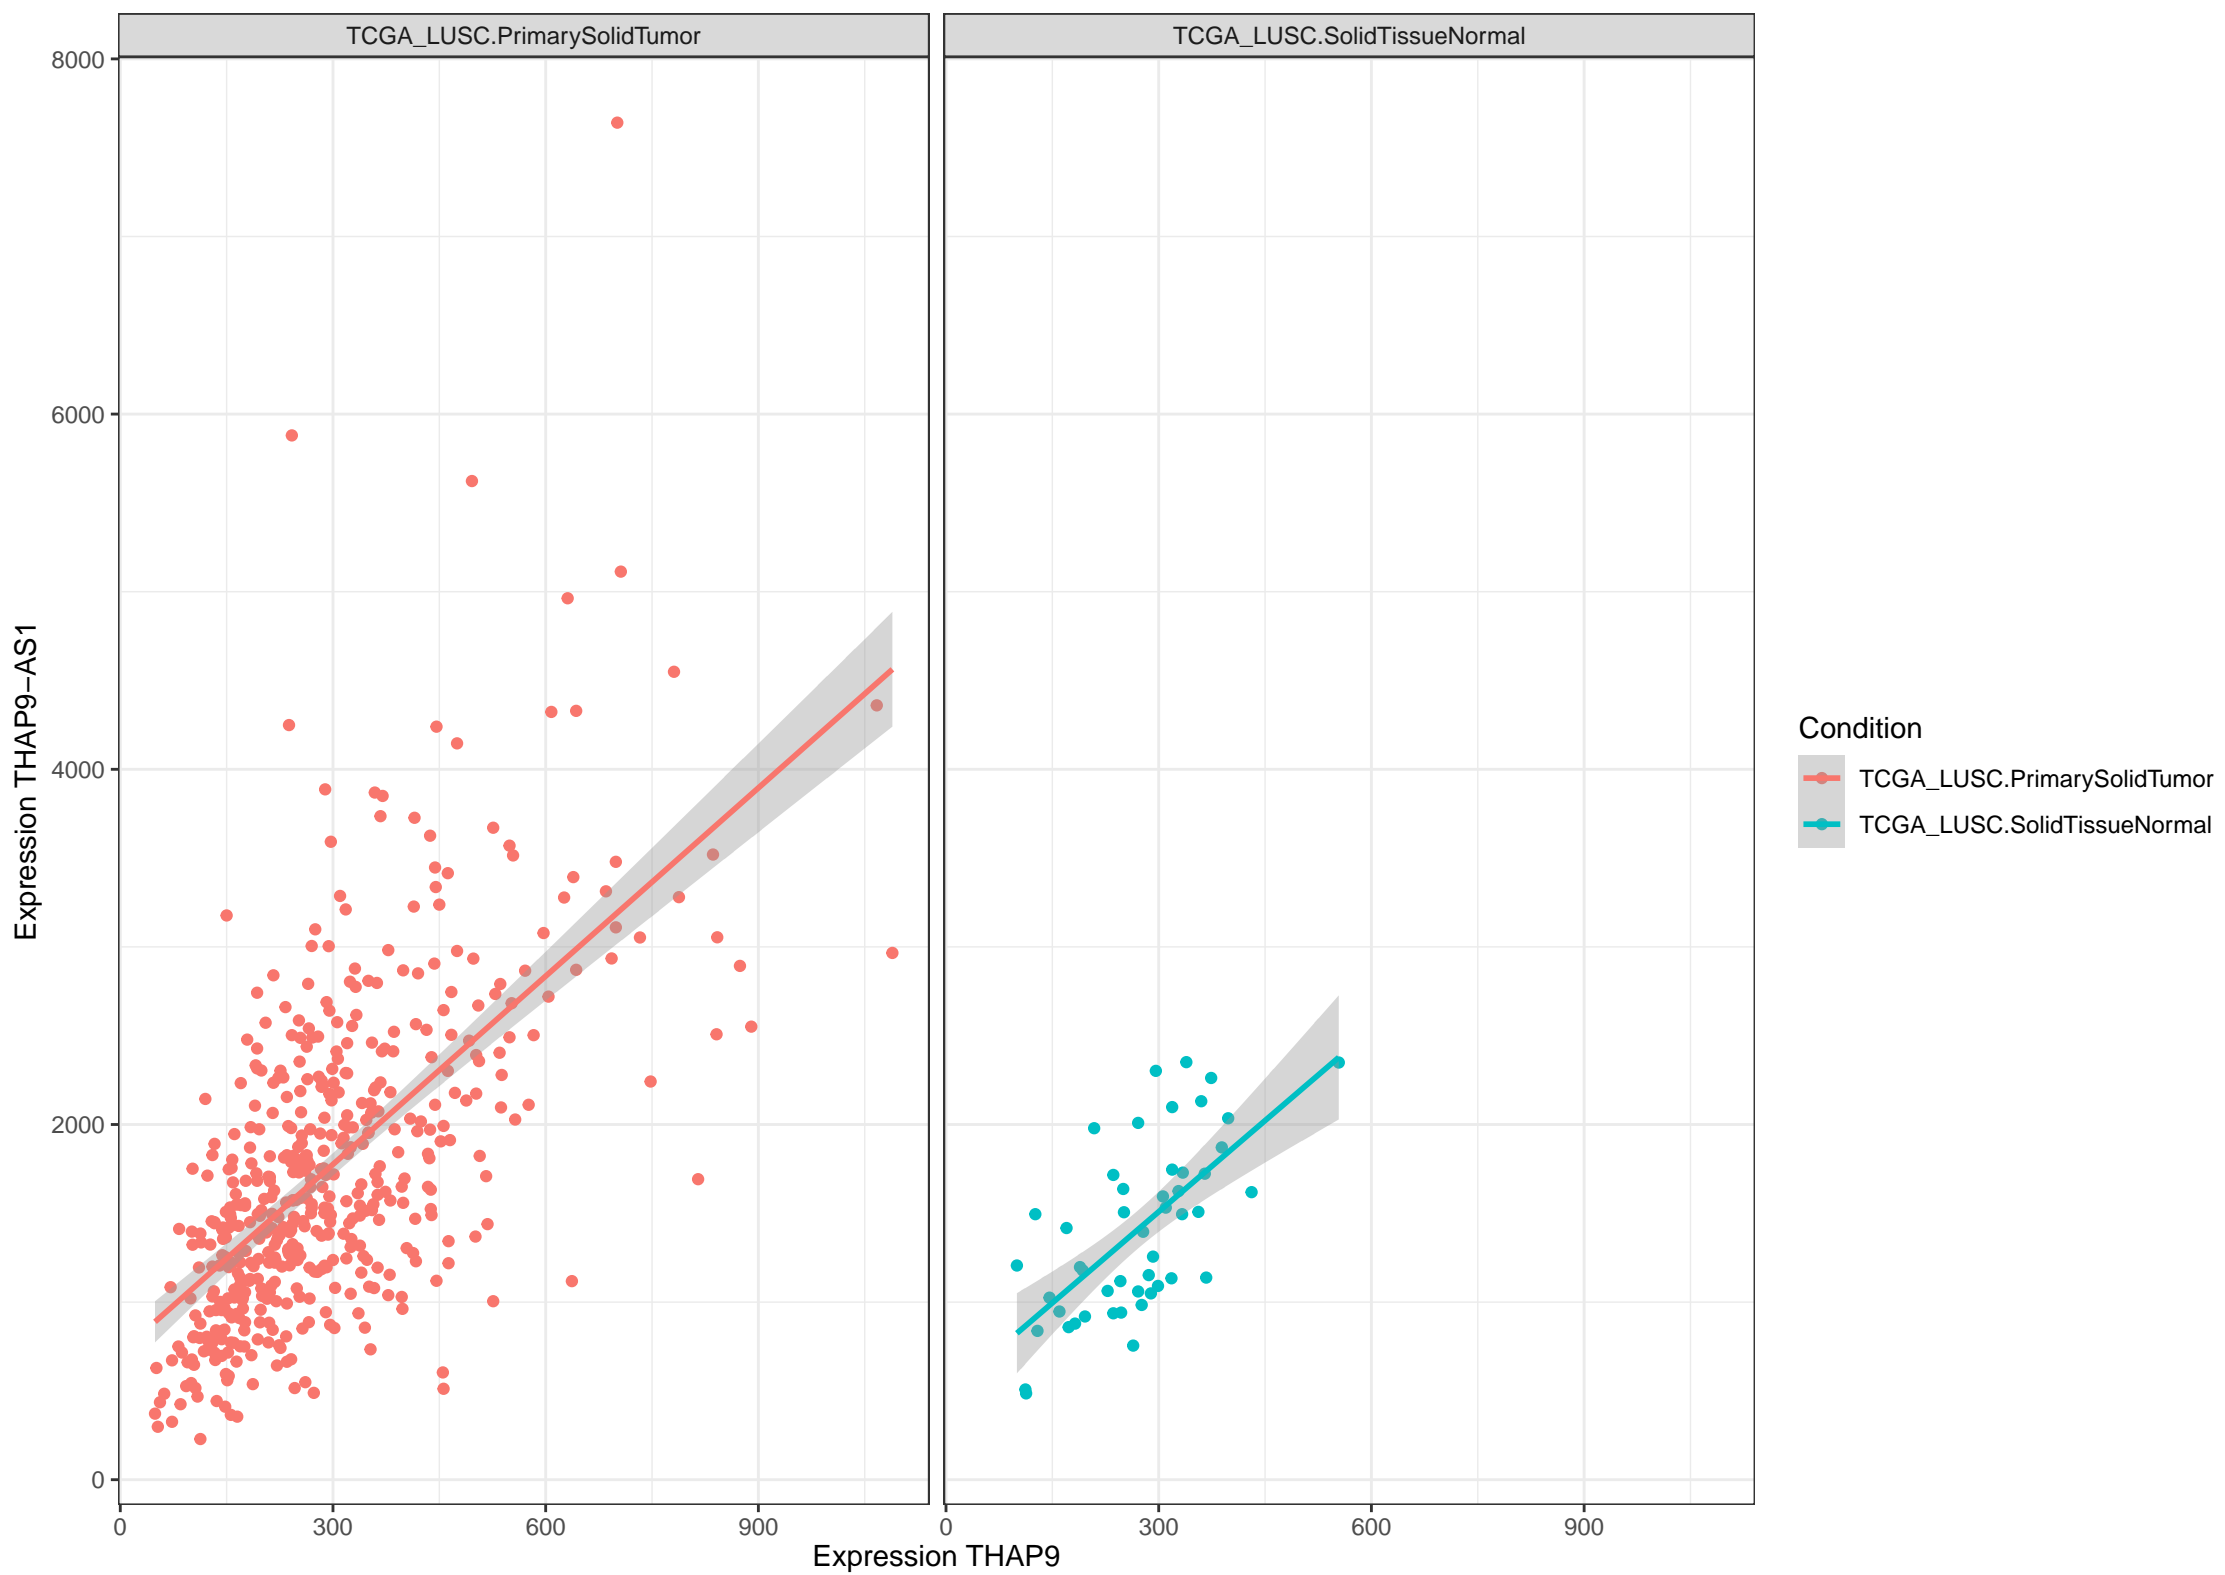

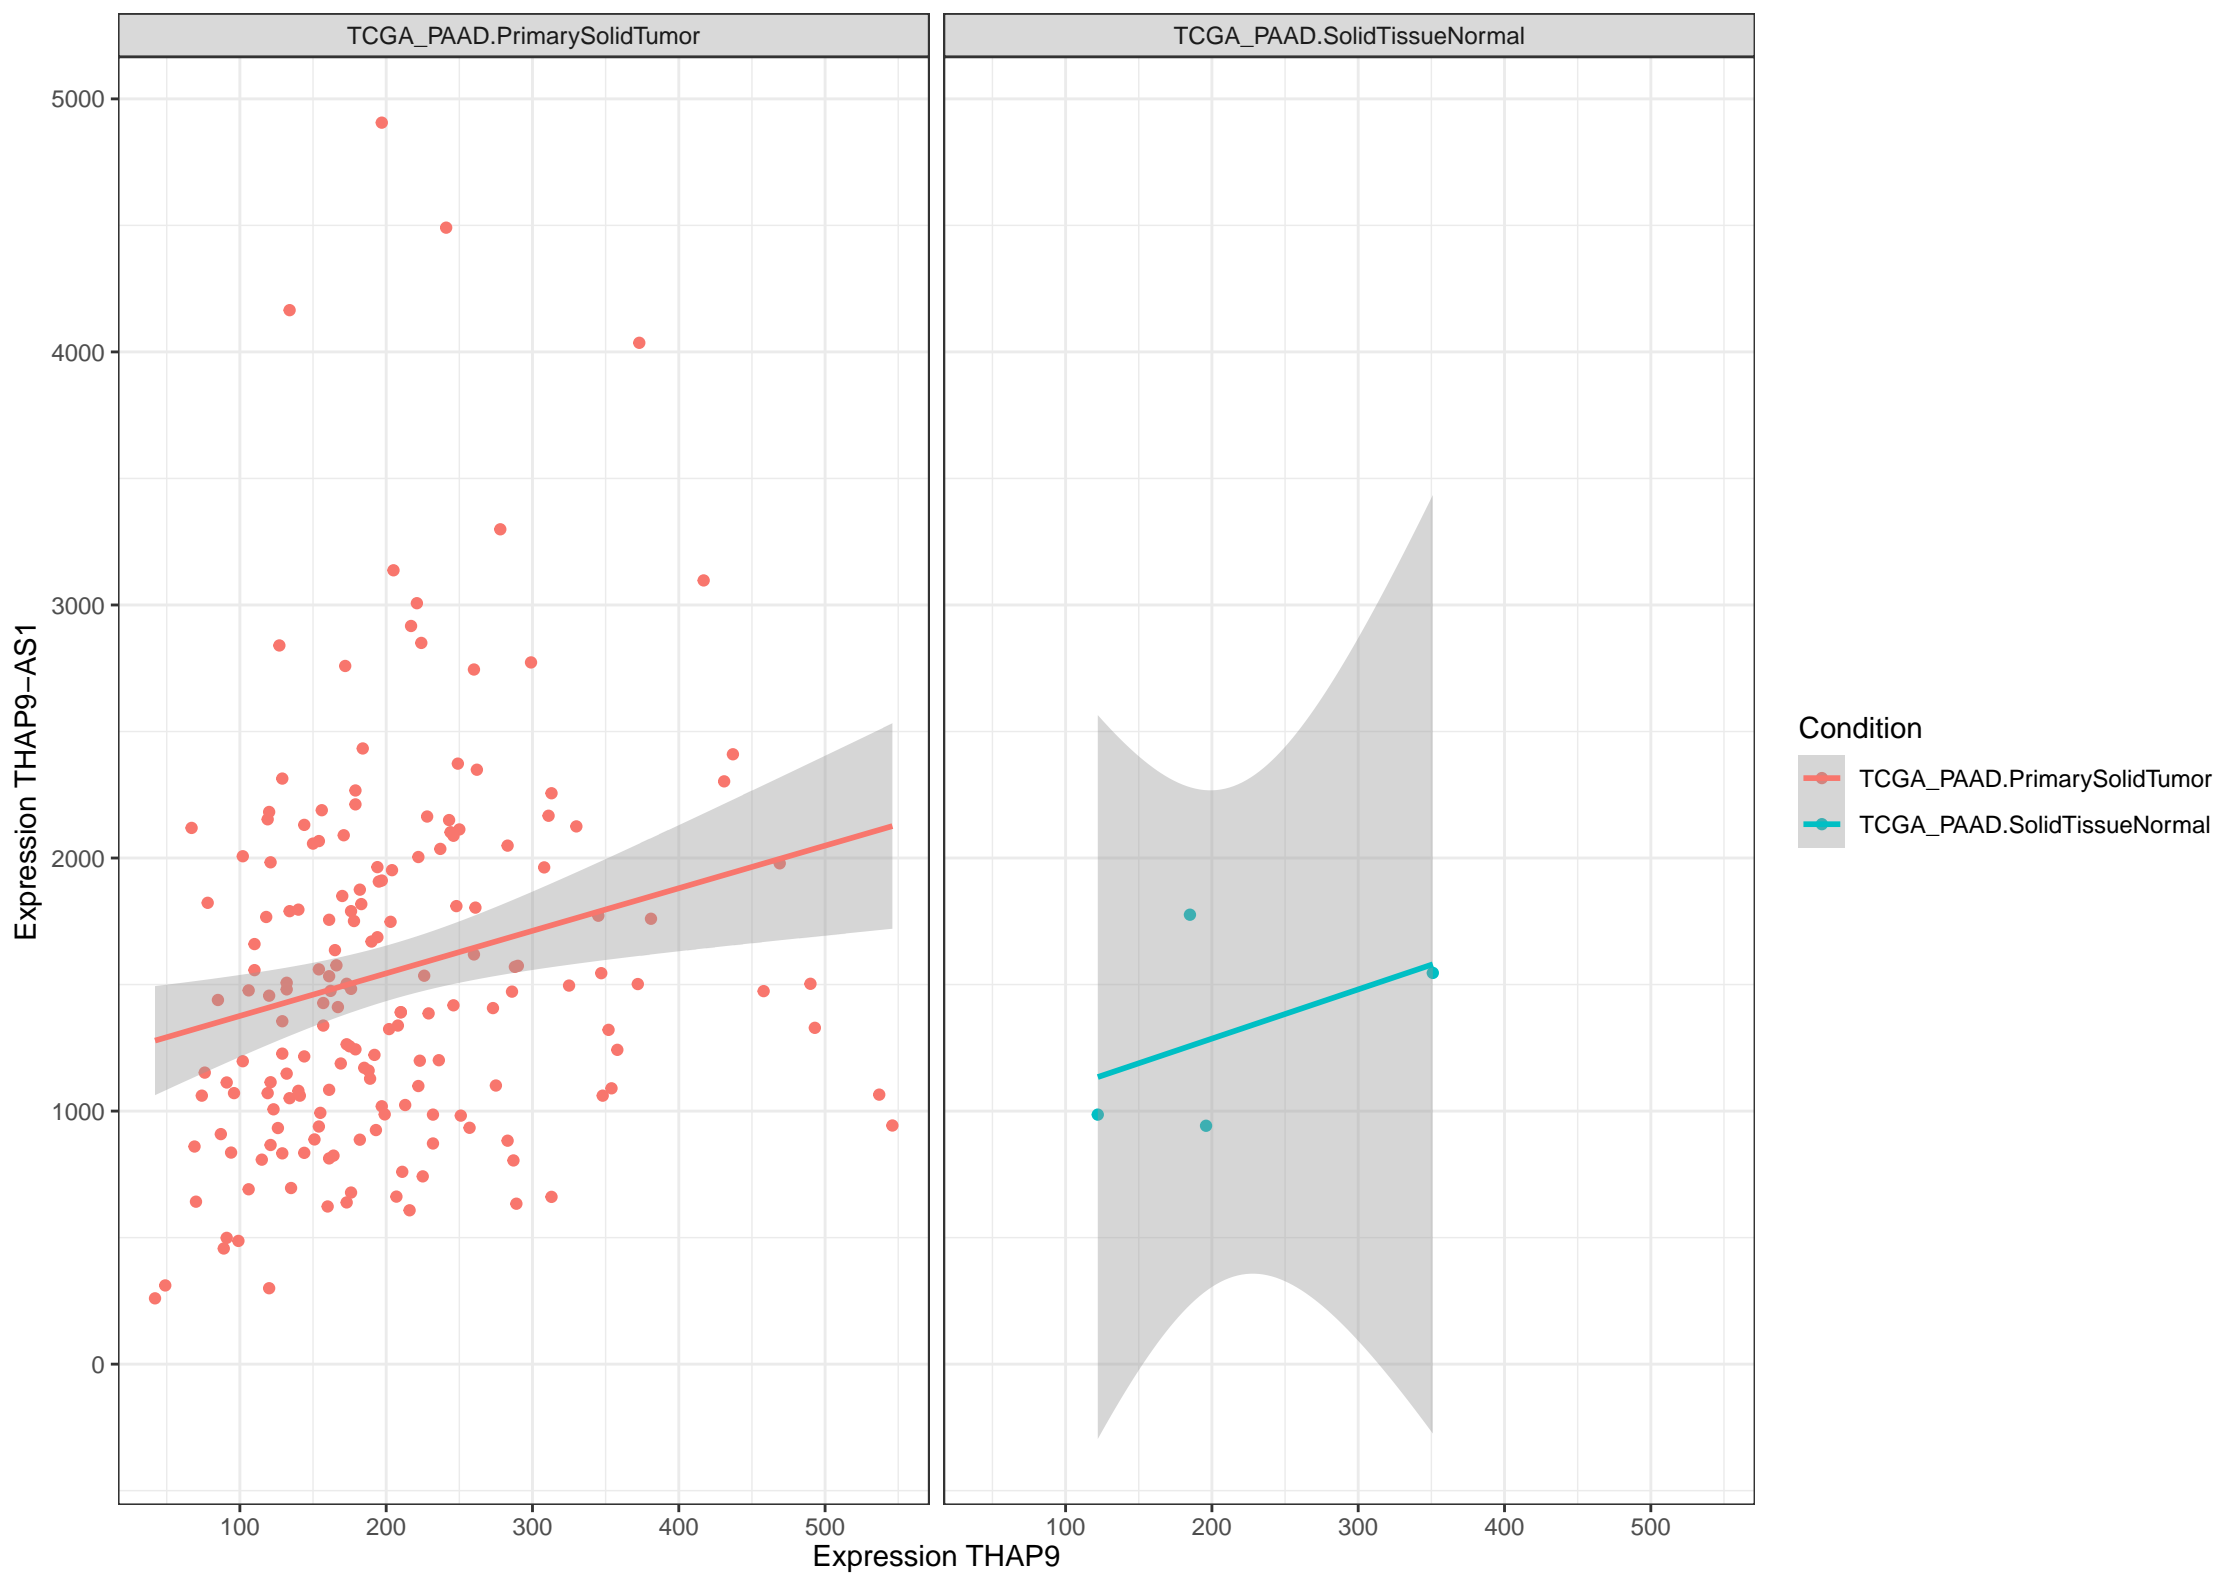

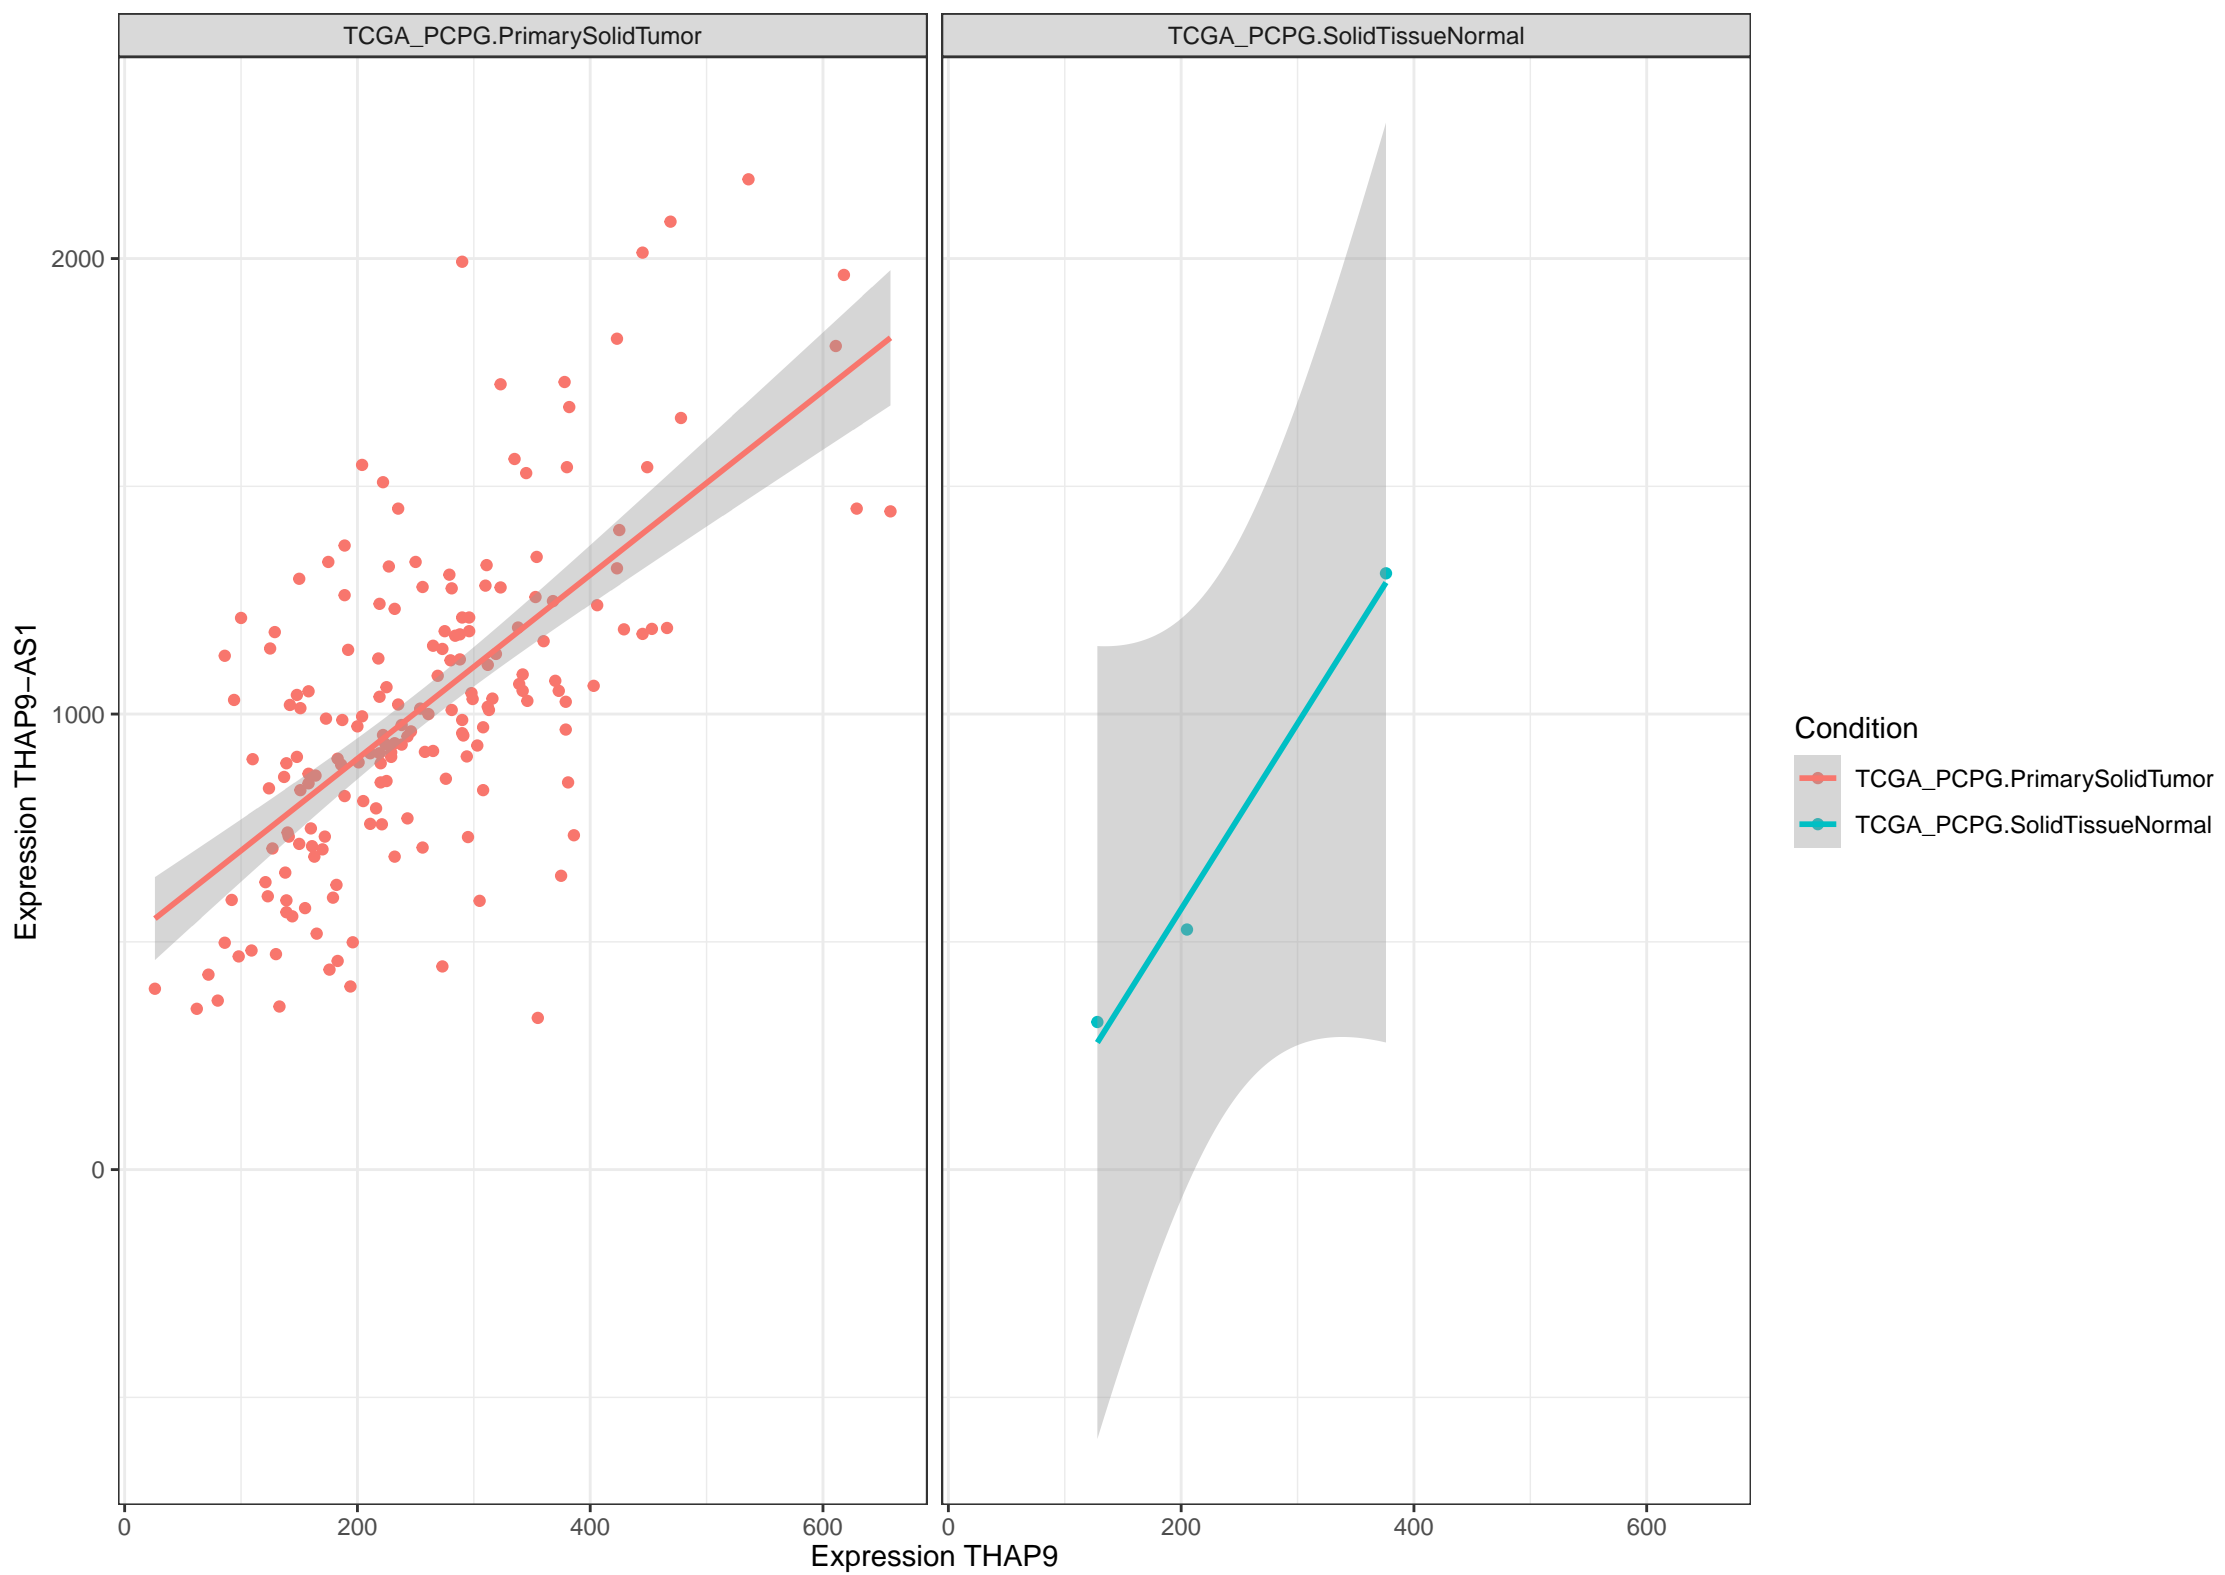



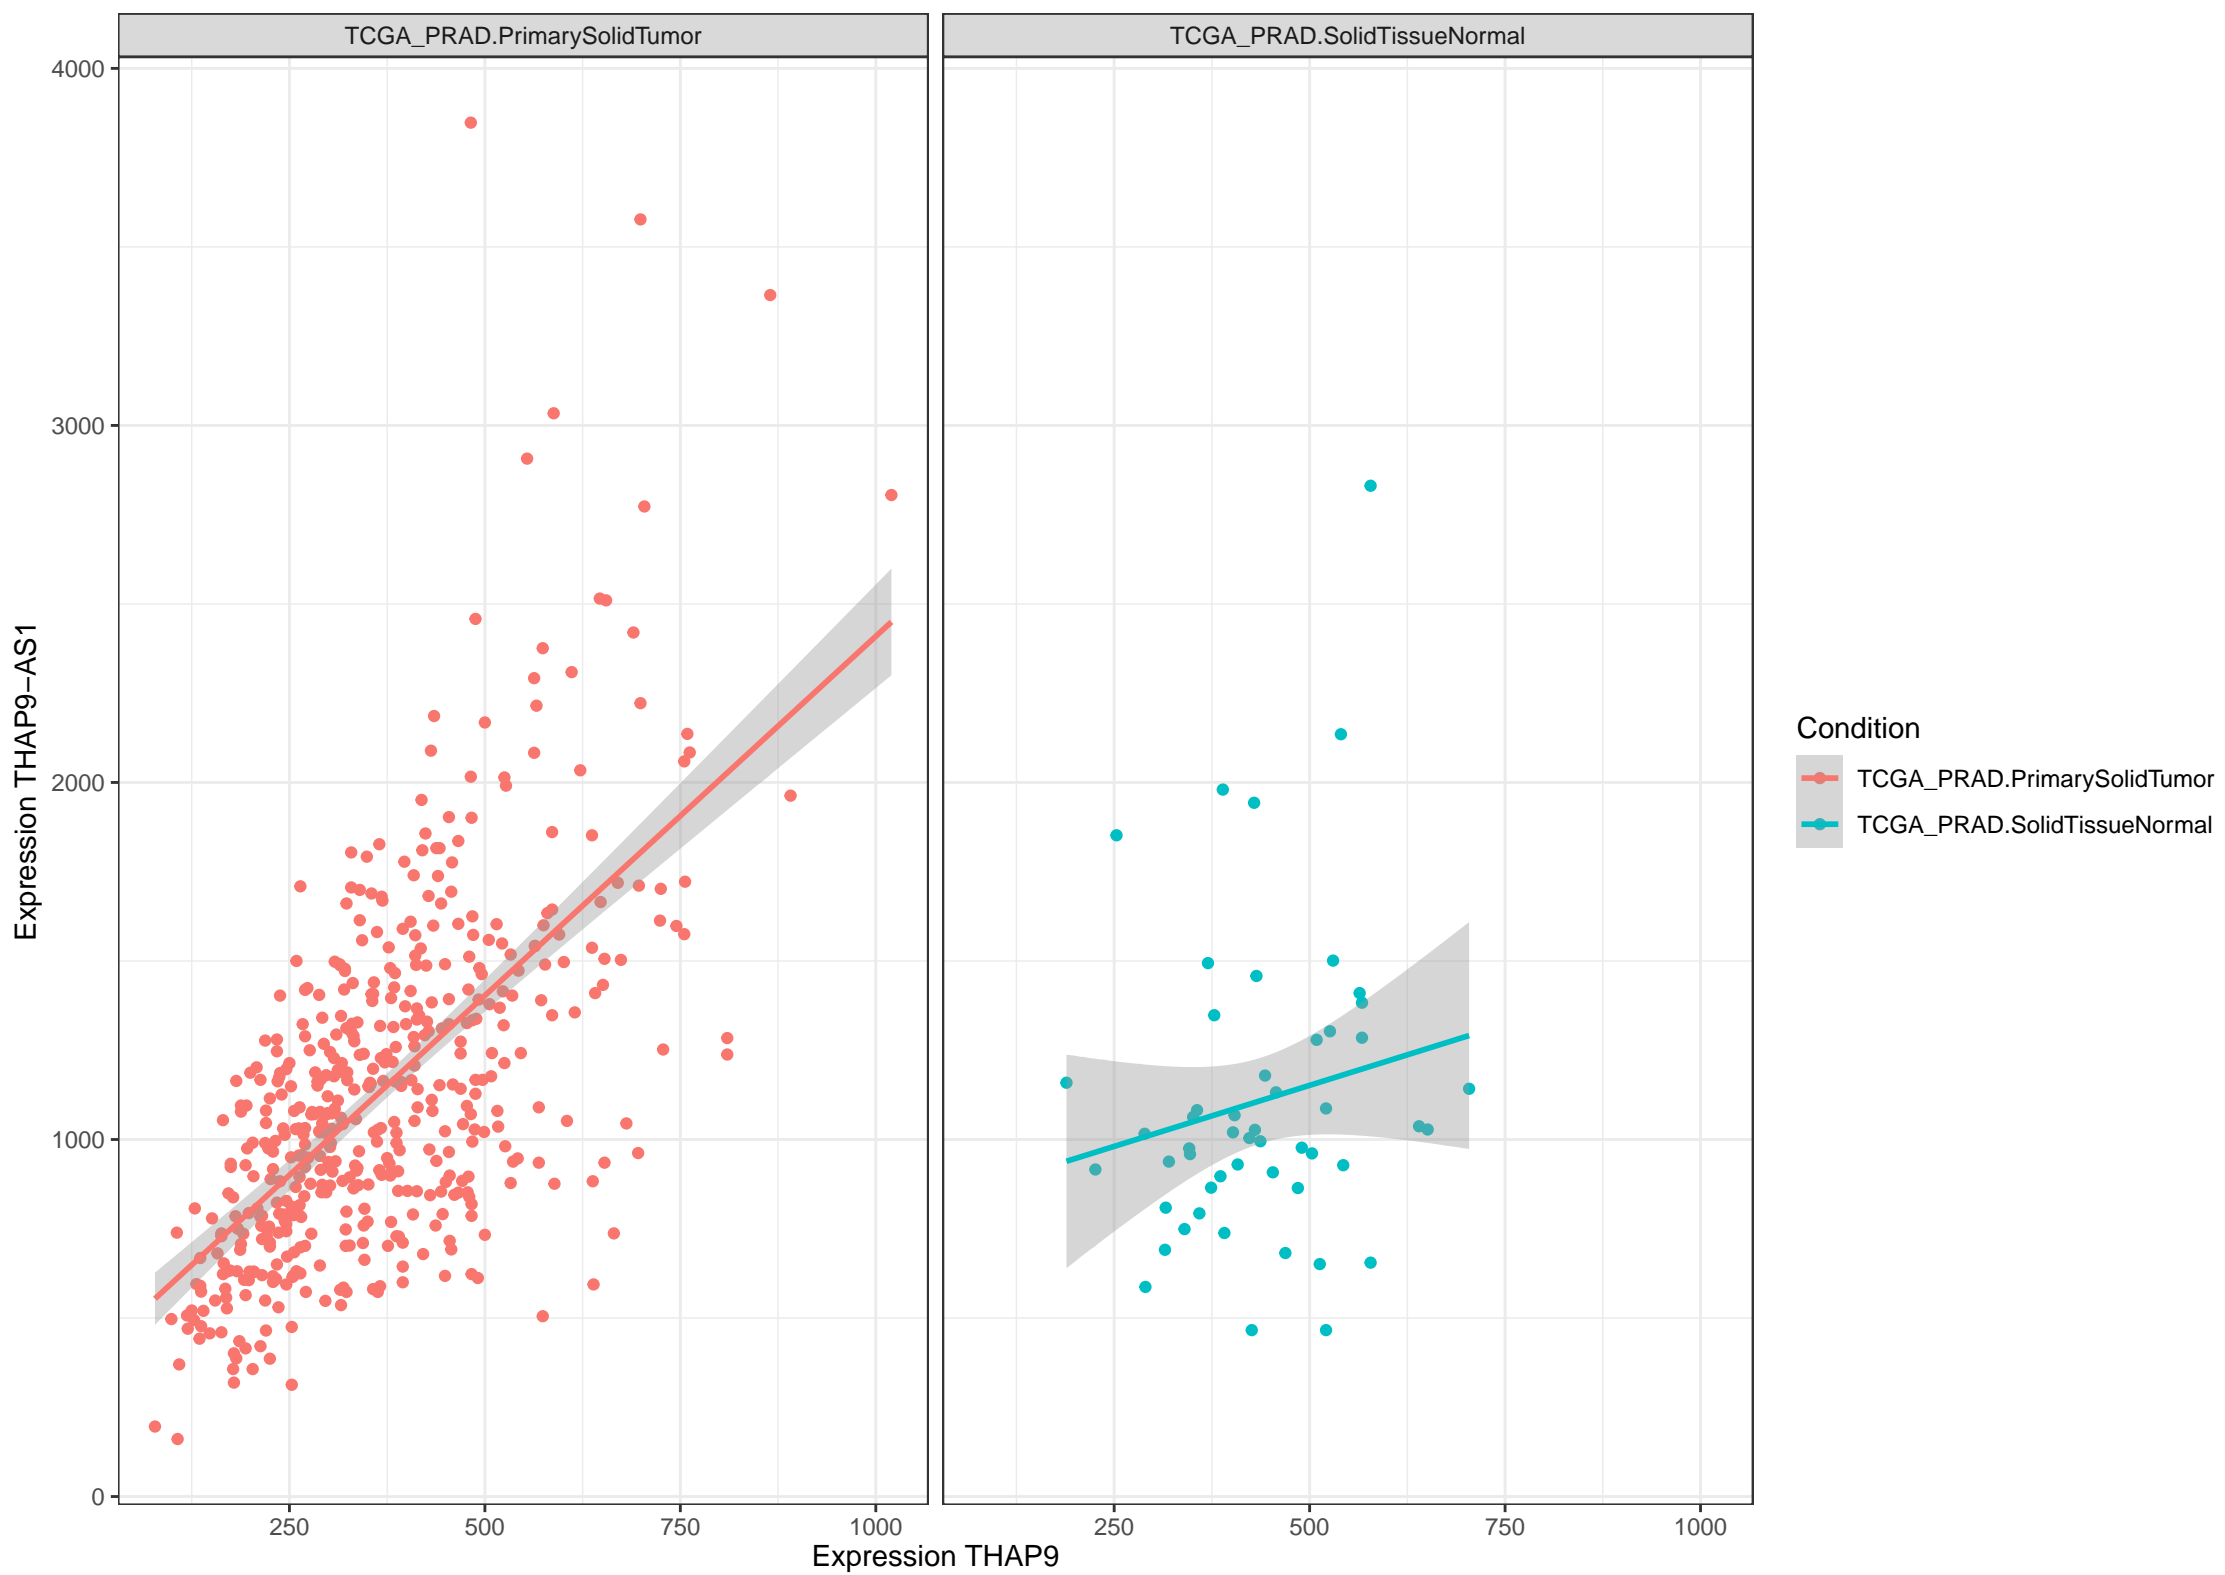

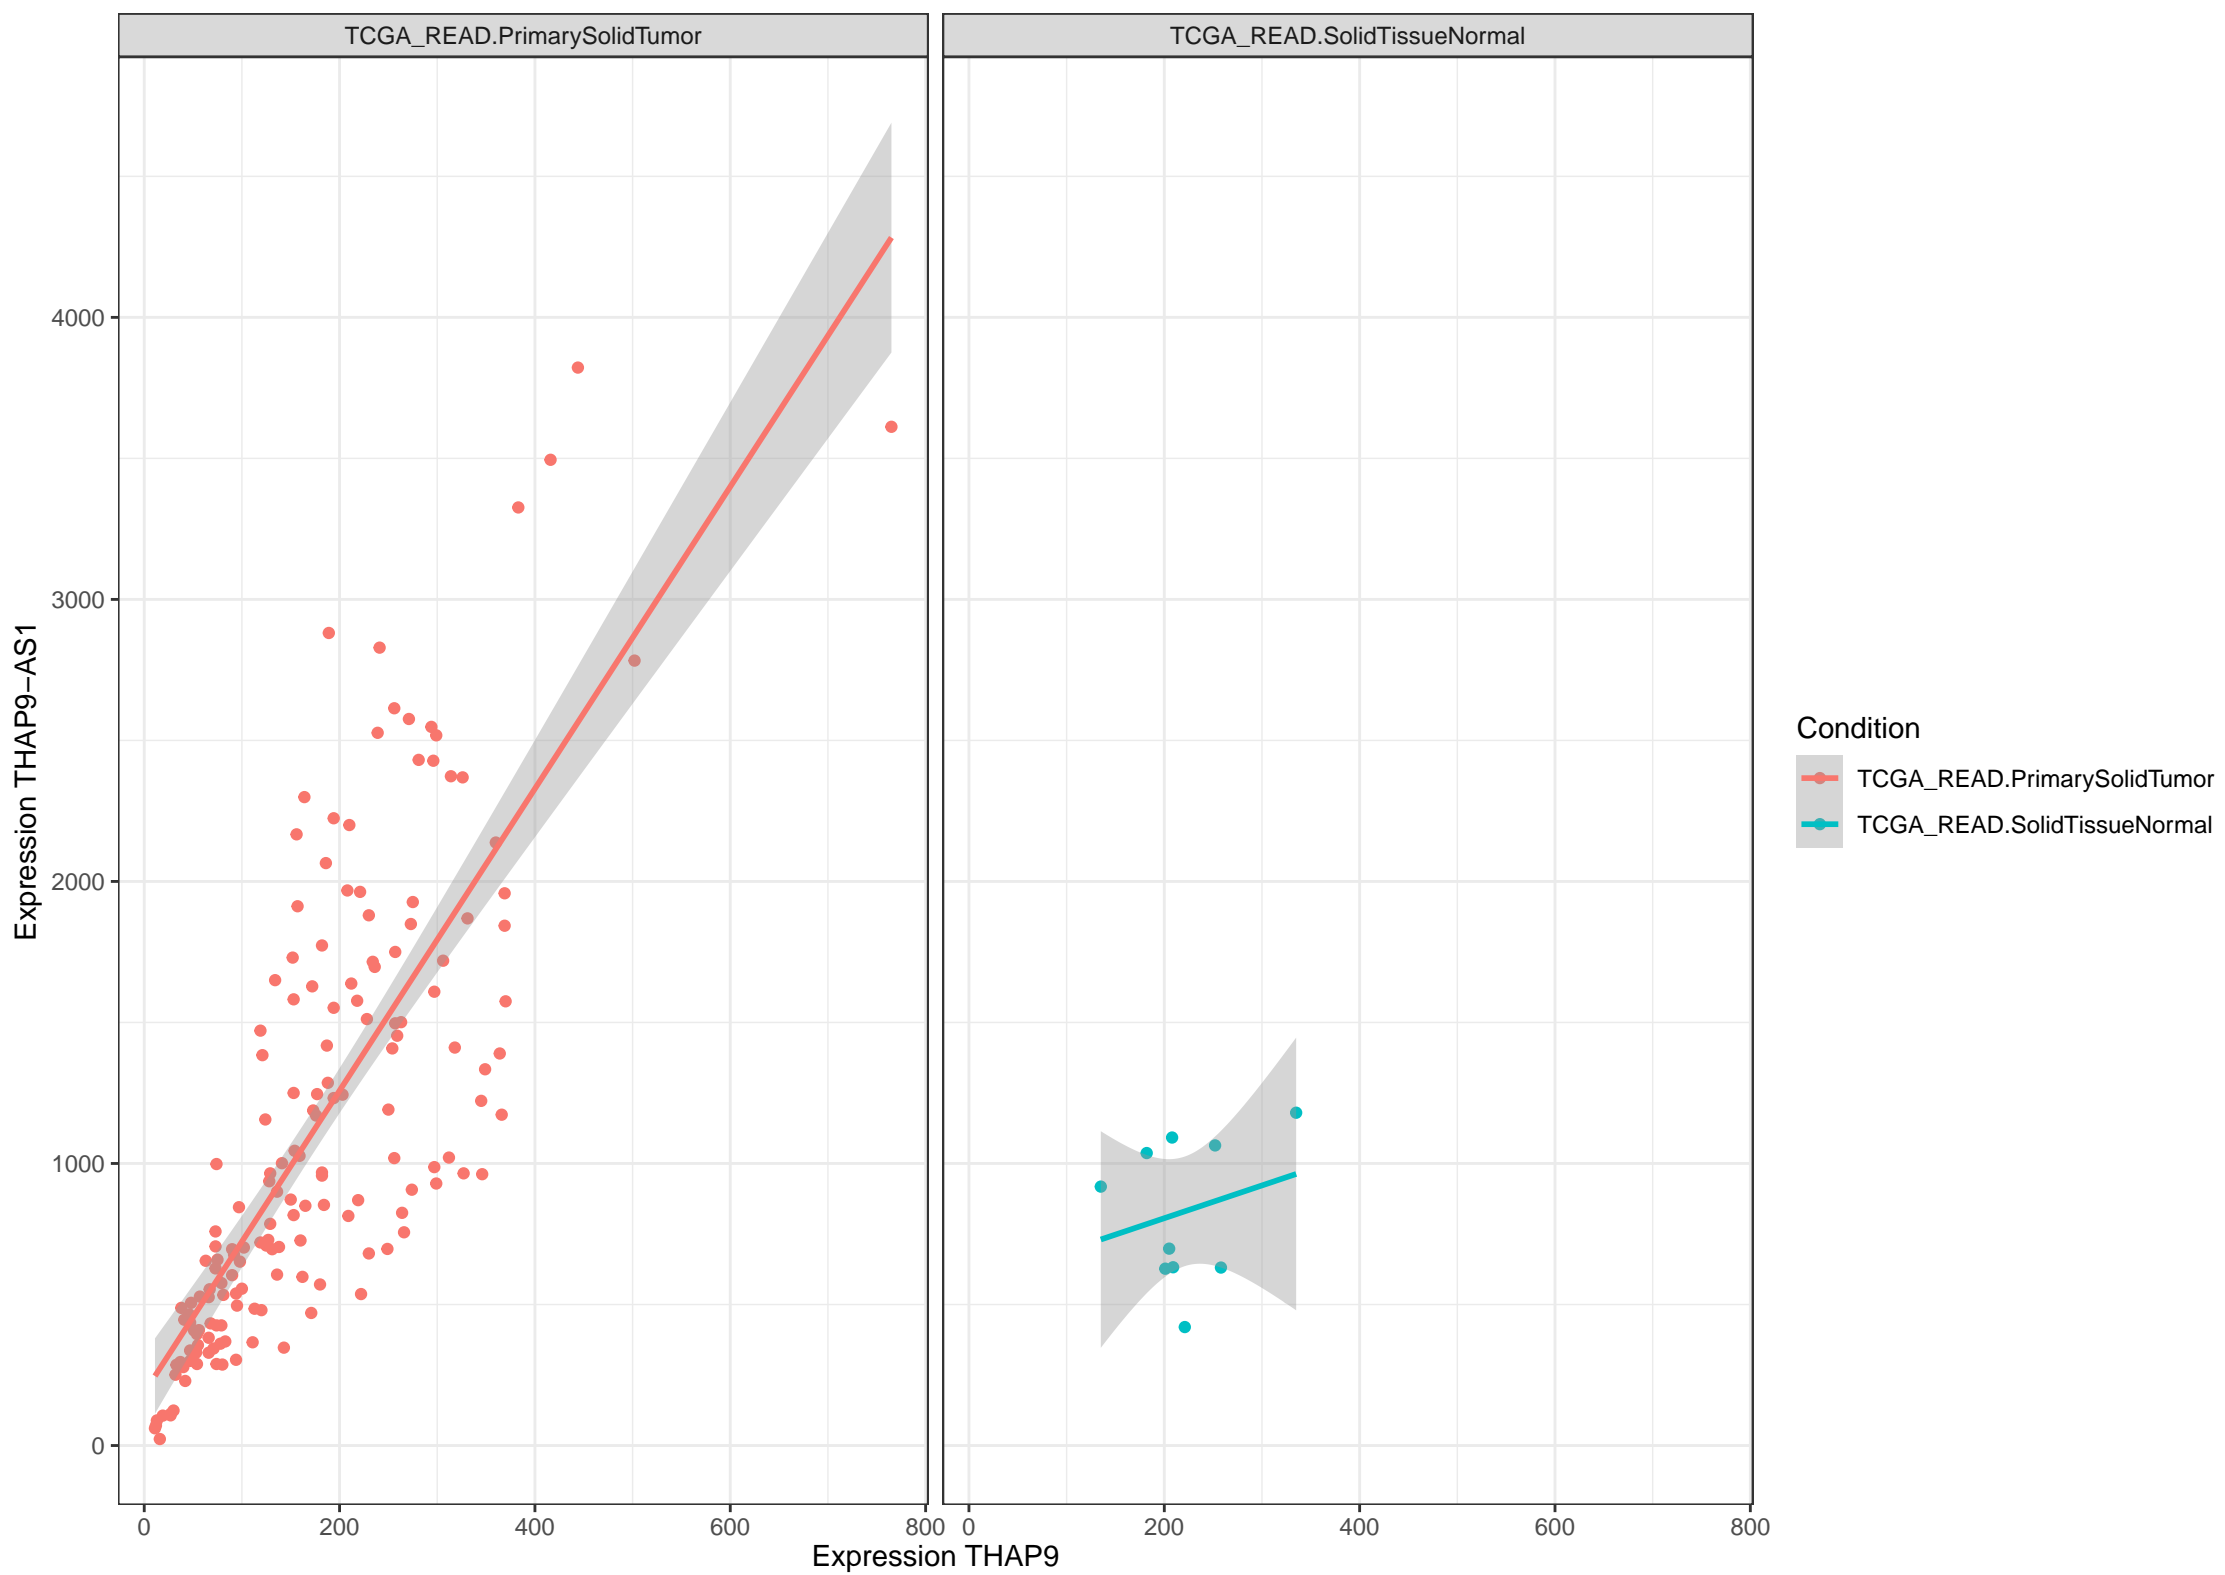

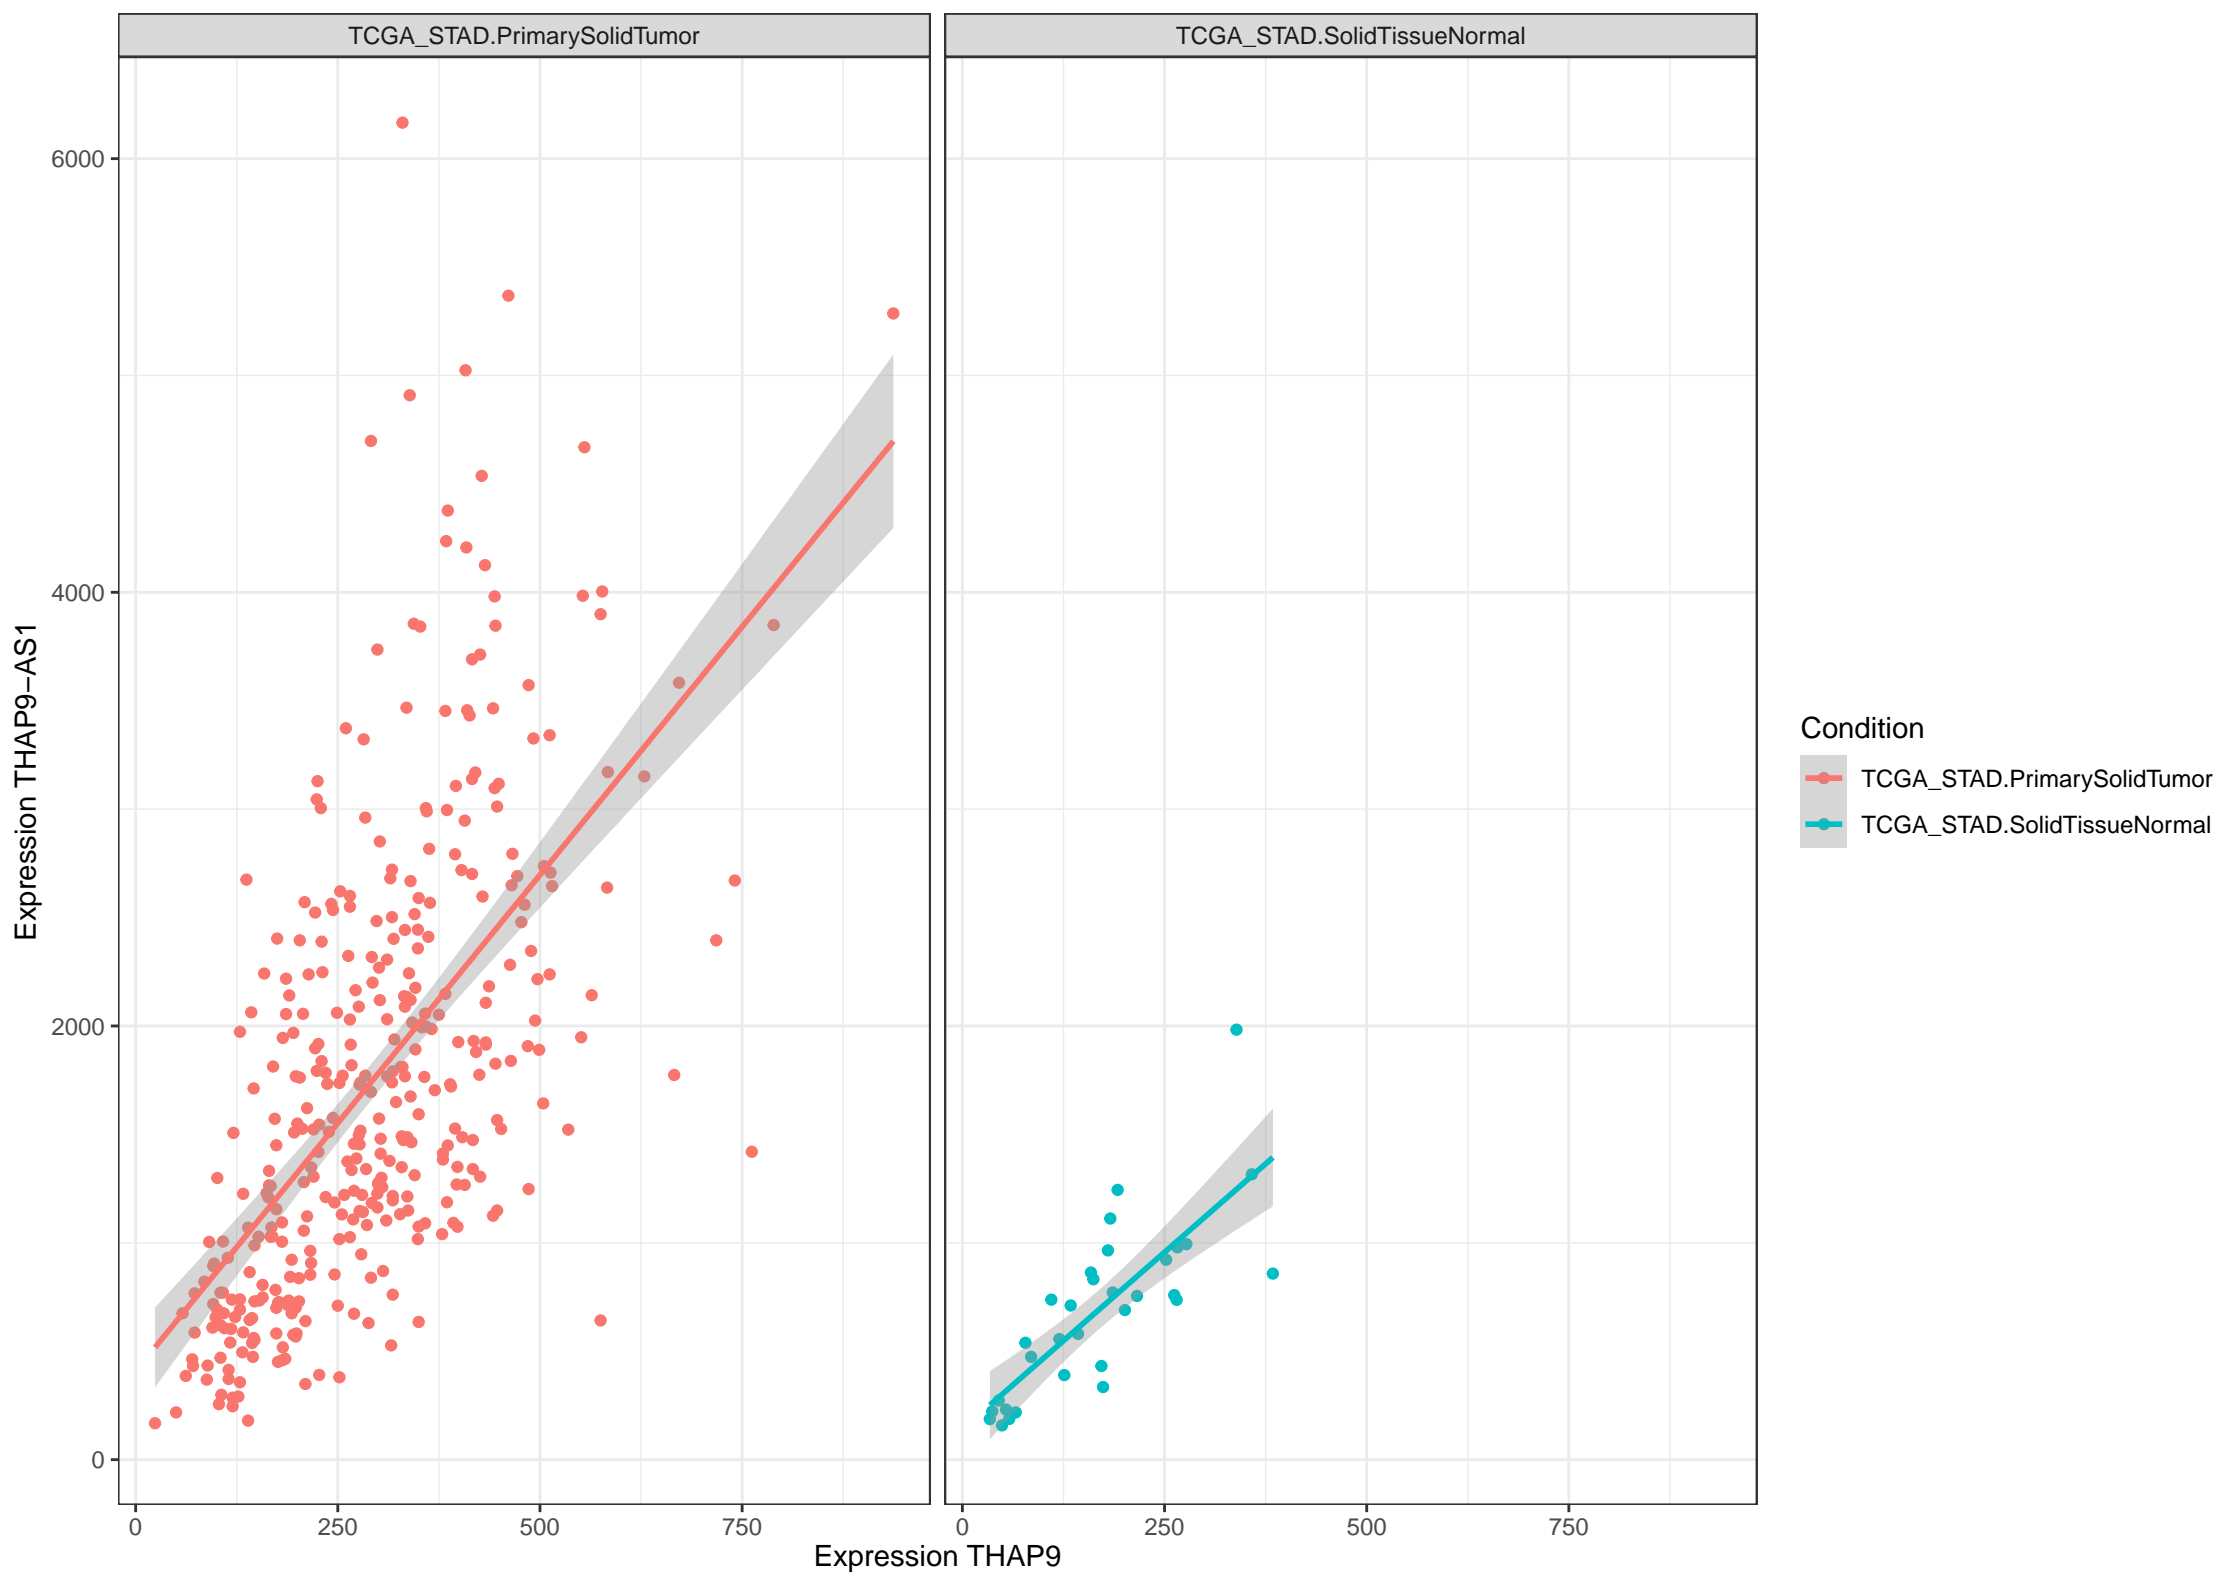

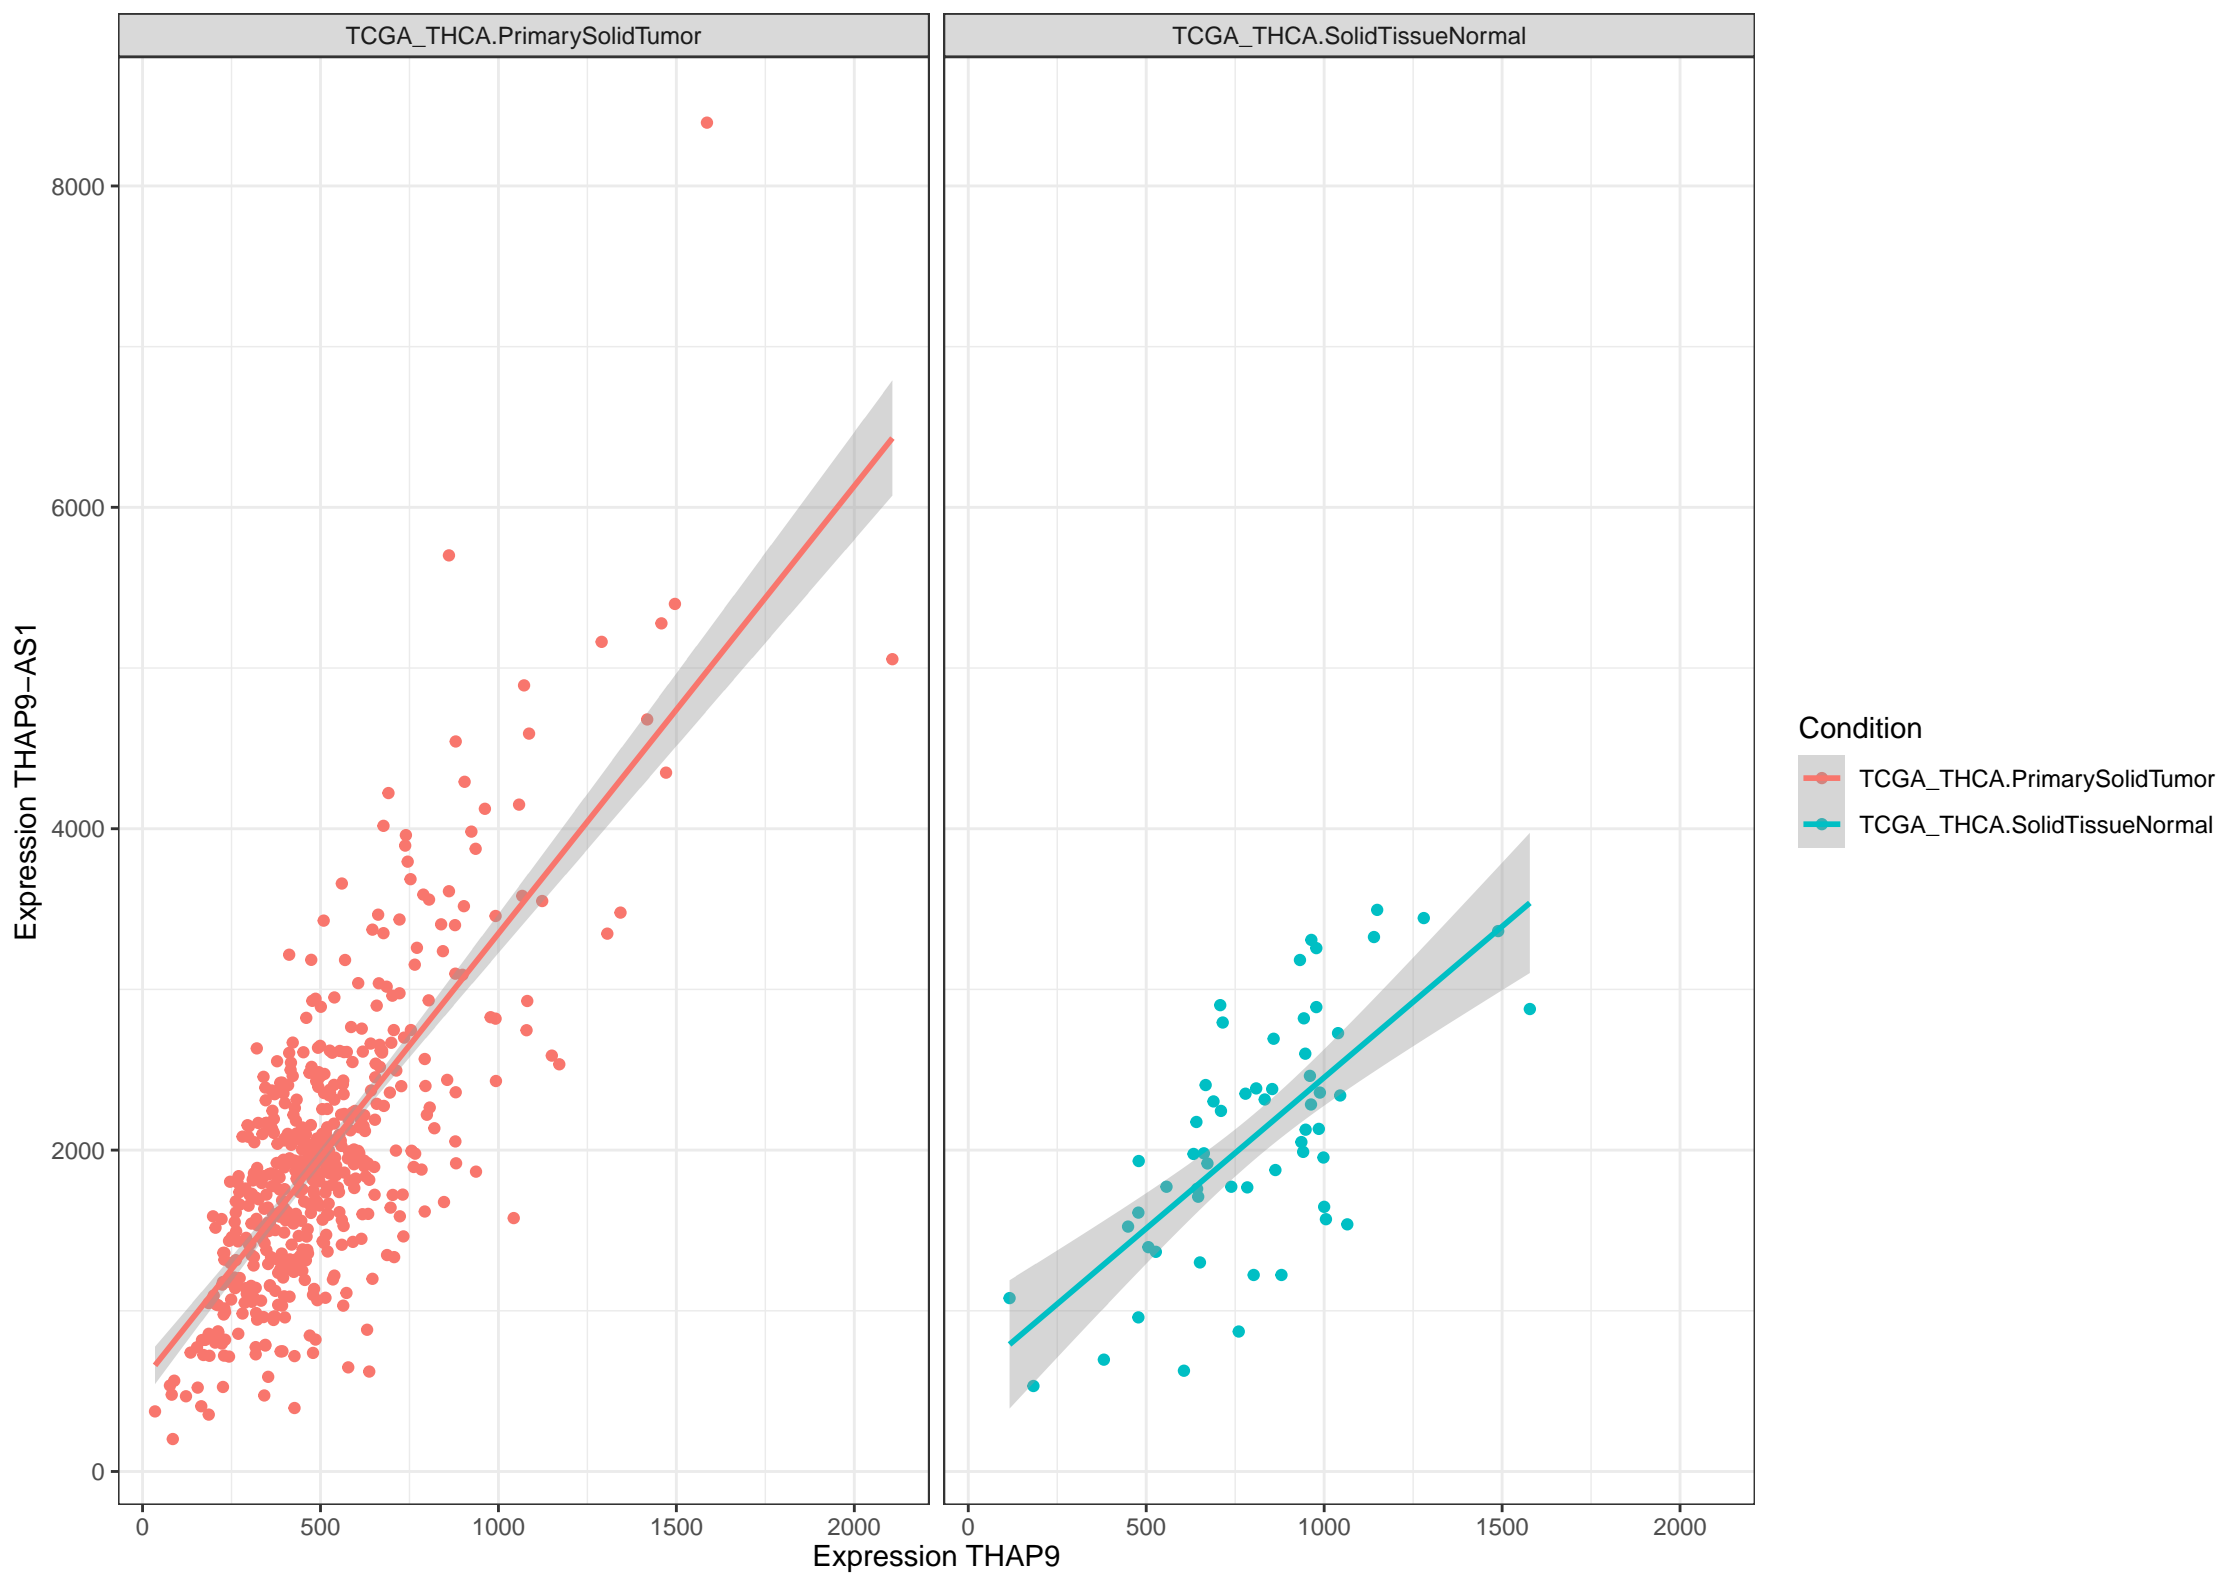

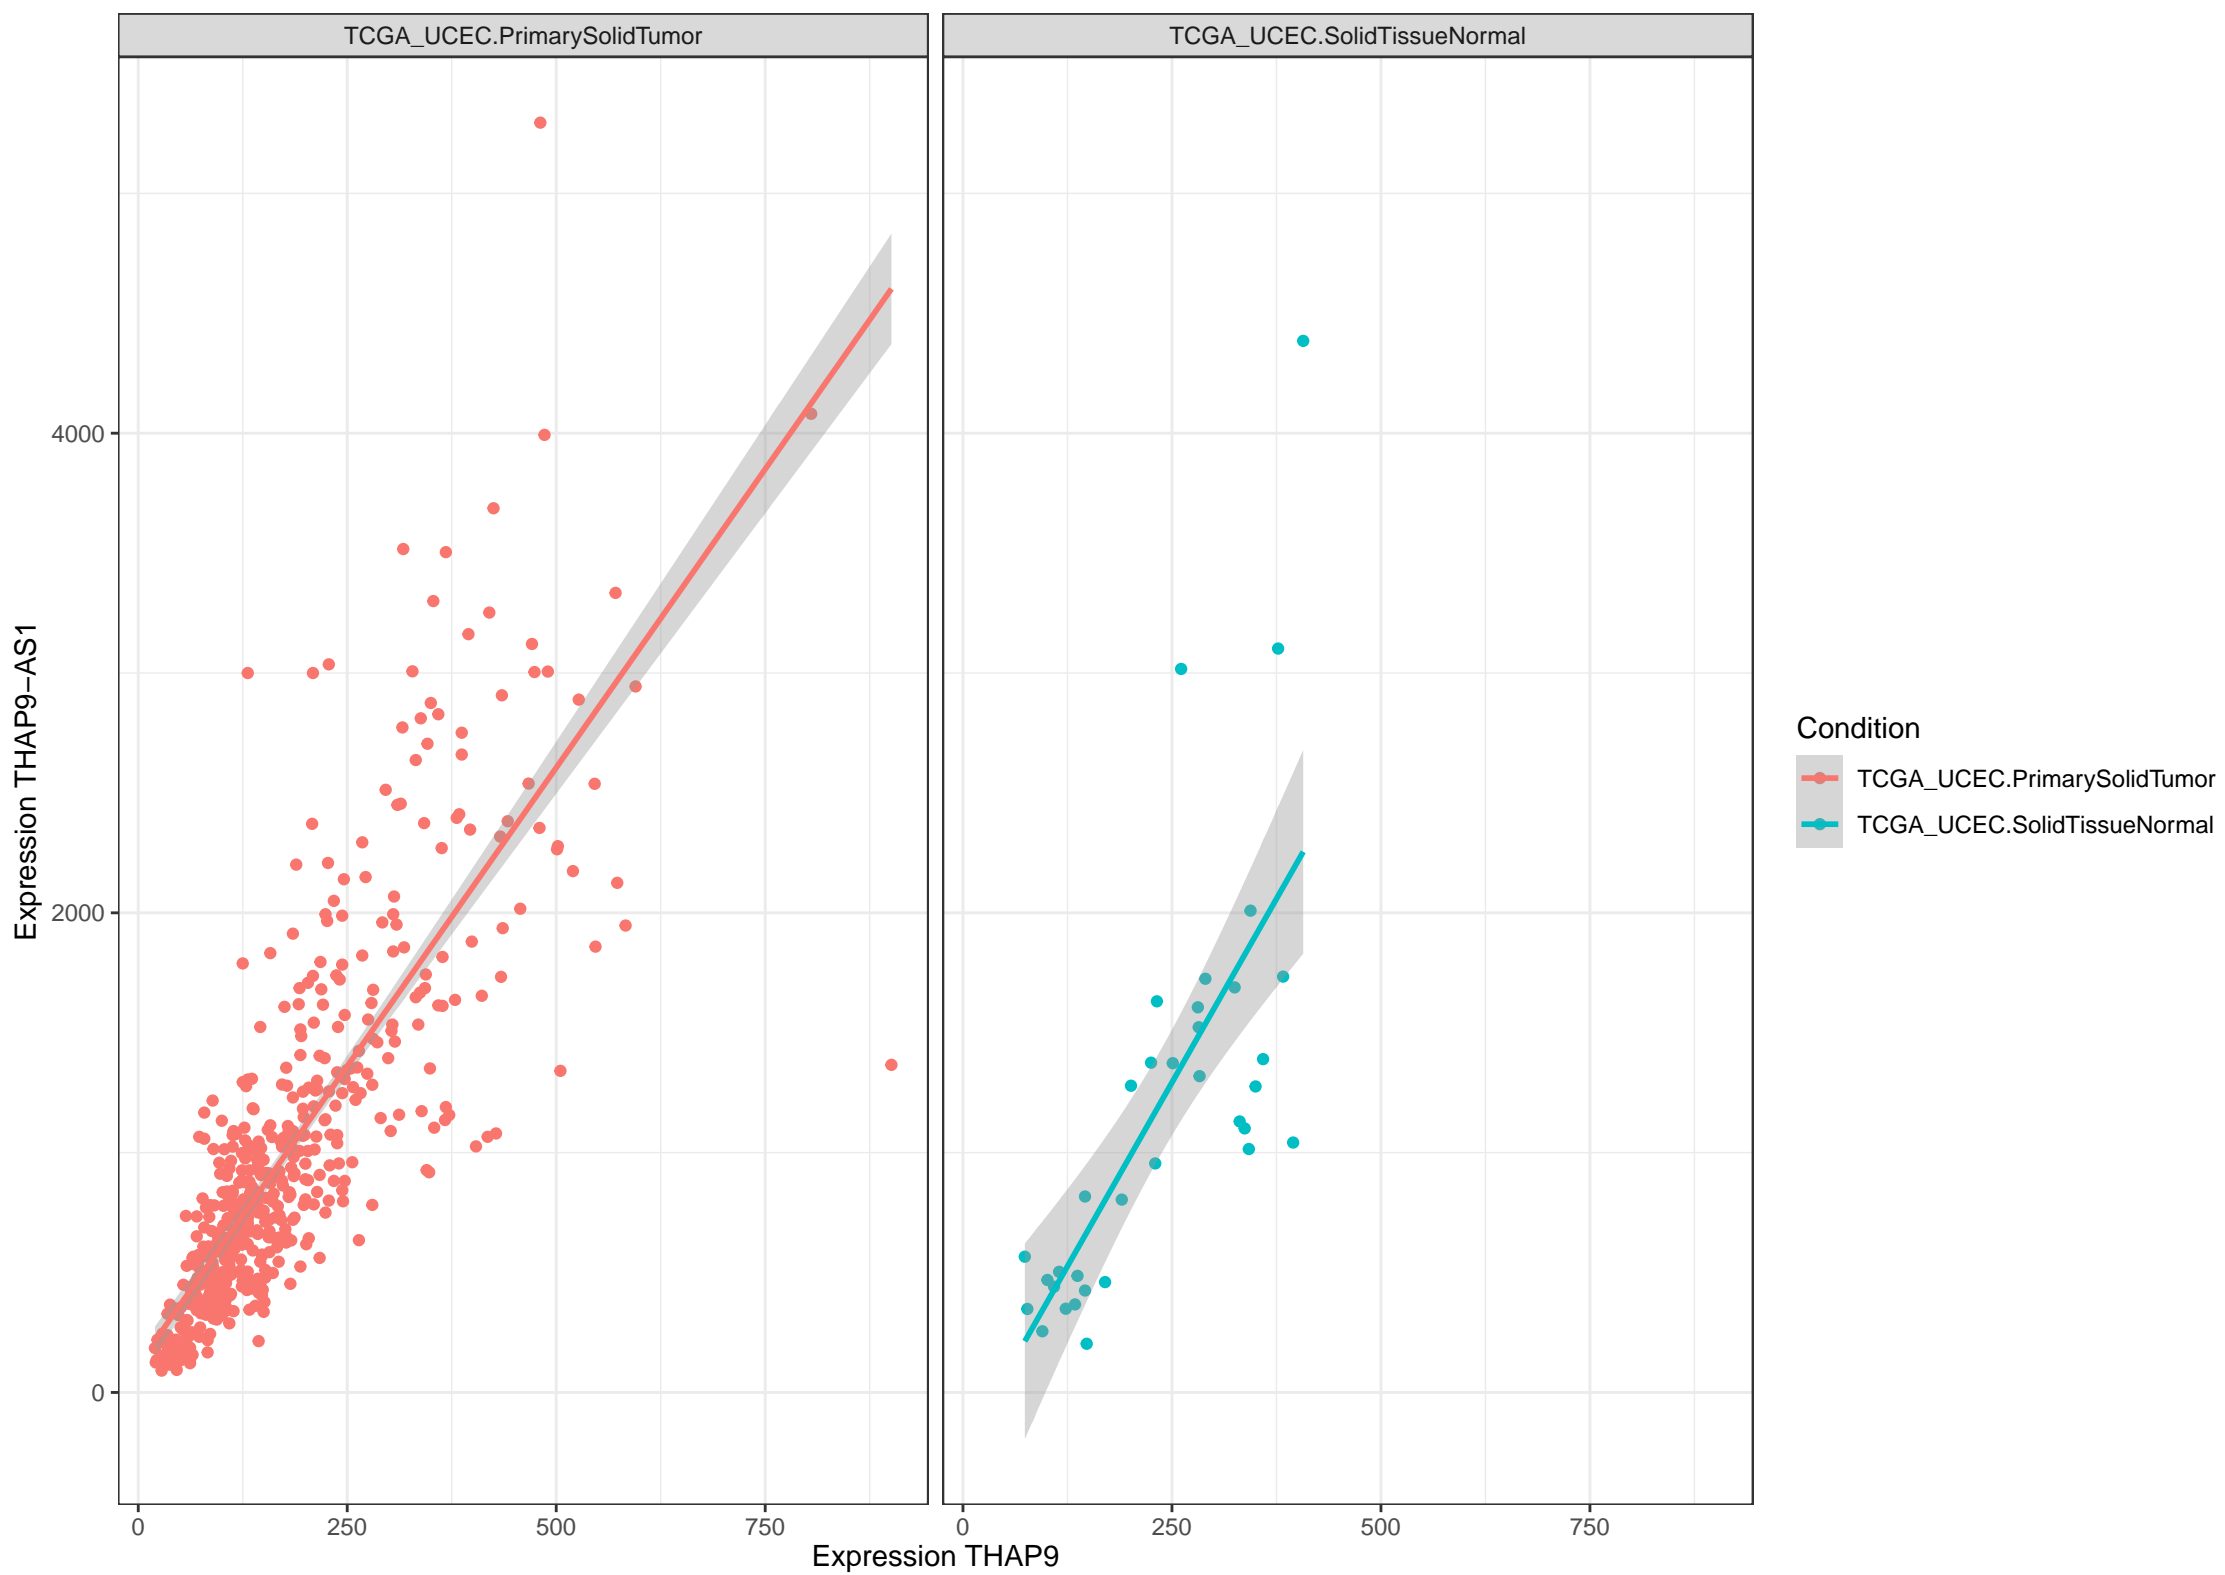

Supplement: s1 [file s1]

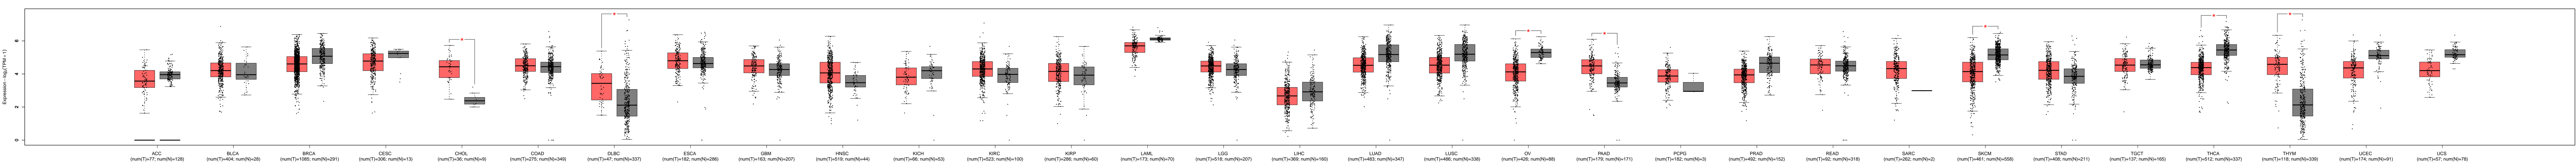

Supplement: s1 [file s1]
